# Supplementary material for: Spermidine supplementation and protein restriction protect from organismal and brain aging independently
Source: Aging (Albany NY). 2025 Jun 7;17(6):1429–51. doi: 10.18632/aging.206267 (PMC12245200; doi:10.18632/aging.206267)
Supplement: Supplementary Table 1 [file aging-17-206267-s002.xlsx]

## Sheet: Results_Figure 1A-1C
Supplementary Table 1. Global proteomic profiles of 15-day-old wild type Drosophila brains under 2% yeast and 12% yeast rearing, related to Figure 1A – 1C.
Accession	Protein	Gene	Coverage	# AAs	# Unique Peptides	# PSMs	2%BS1	2%BS2	12%BS1	12%BS2	2%BS/12%BS
Q6AWN0	1,2-dihydroxy-3-keto-5-methylthiopentene dioxygenase	Adi1	20.97	186	4	4	1.11377	0.847645	1.25381	0.876472	0.920733
A1Z992	1,4-Alpha-Glucan branching enzyme	AGBE	29.2	685	19	21	0.977965	0.902606	1.29572	0.929347	0.845175	up-regulated
P48375	12 kDa FK506-binding protein	FK506-bp2	80.56	108	6	42	1.12473	1.05475	1.09387	0.907411	1.08904	down-regulated
P92177	14-3-3 protein epsilon	14-3-3epsilon	75.19	262	19	292	1.09436	0.977444	1.12672	0.899699	1.0224
P29310	14-3-3 protein zeta	14-3-3zeta	64.92	248	12	297	1.05711	0.995972	0.975027	1.07067	1.00361
P25455	1-phosphatidylinositol 4,5-bisphosphate phosphodiesterase classes I and II	Plc21C	24.43	1318	30	61	1.11208	1.12154	0.926458	1.10224	1.10101
Q9V3U6	26-29kD-proteinase	26-29-p	10.56	549	6	8	1.18111	0.949773	1.41472	1.05288	0.863541
P48601	26S protease regulatory subunit 4	Rpt2	37.81	439	13	38	1.04598	1.10079	1.03855	1.02225	1.04172
O18413	26S protease regulatory subunit 8	Rpt6	51.36	405	10	33	1.00561	1.03211	1.08483	0.993103	0.98065
Q7KLV9	26S proteasome non-ATPase regulatory subunit 11	Rpn6	31.52	422	13	18	1.00594	1.07653	1.0025	1.08784	0.996239
Q9V3H2	26S proteasome non-ATPase regulatory subunit 14	Rpn11	16.23	308	5	11	0.990472	1.18934	1.00547	1.01931	1.07657
P55035	26S proteasome non-ATPase regulatory subunit 4	Rpn10	22.22	396	8	14	1.15037	1.00483	1.01445	0.939922	1.10276
Q9VYG1	26S proteasome non-ATPase regulatory subunit 5	CG12096	9.09	506	5	5	0.949764	0.903458	1.05991	1.05289	0.87714
Q9V3G7	26S proteasome non-ATPase regulatory subunit 6	Rpn7	25.45	389	9	17	0.997822	1.10161	0.967602	1.06216	1.03432
Q9VFS8	26S proteasome non-ATPase regulatory subunit 9	CG9588	27.27	220	5	6	1.02593	0.932611	1.00302	1.05737	0.950569
Q9V436	26S proteasome regulatory complex subunit p30	Rpn12	23.86	264	7	16	1.0811	0.948273	1.43546	0.973265	0.842506
Q7KMP8	26S proteasome regulatory complex subunit p39A	Rpn9	35.86	382	13	23	1.0843	0.950461	1.26897	0.83972	0.964941
Q9V405	26S proteasome regulatory complex subunit p48A	Rpt3	37.53	413	14	31	1.06342	1.09789	0.934469	1.11076	1.05676
Q7KMQ0	26S proteasome regulatory complex subunit p48B	Rpt1	54.04	433	21	43	1.00963	1.06999	0.960803	1.06596	1.02608
Q9V3V6	26S proteasome regulatory complex subunit p50	Rpt5	52.34	428	22	30	1.06013	1.06827	1.01546	1.09207	1.0099
Q9VW54	26S proteasome regulatory complex subunit p97	Rpn1	26.66	919	22	41	1.02323	1.00745	1.10145	0.900051	1.01458
Q9VFB2	28S ribosomal protein S10, mitochondrial	mRpS10	17.92	173	3	4	1.35396	1.02519	0.922493	0.806266	1.37622
Q9VKX4	28S ribosomal protein S7, mitochondrial	mRpS7	18.35	218	3	3	1.06502	1.10089	0.986152	0.807115	1.2078
P54397	39 kDa FK506-binding nuclear protein	FK506-bp1	16.81	357	6	9	1.21269	1.00745	0.974922	0.95666	1.14939
Q9VVH5	AT13736p	UQCR-Q	29.21	89	4	12	2.81466	1.22428	0.784929	0.76778	2.60122
Q9VUJ0	39S ribosomal protein L39, mitochondrial	mRpL39	7.51	333	2	2	1.22736	0.855079	1.03103	0.658072	1.23286
O18404	3-hydroxyacyl-CoA dehydrogenase type-2	scu	63.53	255	8	42	1.57426	0.857414	1.10647	0.732272	1.32246
P54192	General odorant-binding protein 19d	Obp19d	38.67	150	5	5	3.60435	1.92951	0.997032	1.16113	2.56415
Q9VWG3	40S ribosomal protein S10b	RpS10b	31.87	160	4	9	0.8354	1.09227	1.16191	1.18441	0.821571
Q0E9B6	40S ribosomal protein S11	RpS11	16.77	155	4	5	0.930526	1.08292	1.18014	1.01741	0.916222
P80455	40S ribosomal protein S12	RpS12	49.64	139	6	12	1.13472	0.881276	1.19275	0.849729	0.987035
Q03334	40S ribosomal protein S13	RpS13	31.13	151	6	15	0.947395	0.97272	1.21338	1.17286	0.804661
P14130	40S ribosomal protein S14	RpS14a	46.36	151	6	14	0.879106	0.910006	1.20974	1.09206	0.777267
Q9W237	40S ribosomal protein S16	RpS16	36.49	148	7	15	0.919763	0.965885	1.27533	1.03532	0.816069
P17704	40S ribosomal protein S17	RpS17	48.85	131	6	9	0.888052	0.973857	1.09977	1.1759	0.818182
P41094	40S ribosomal protein S18	RpS18	50.66	152	10	16	0.91056	1.12655	1.00773	1.19325	0.925545
P39018	40S ribosomal protein S19a	RpS19a	48.08	156	9	19	0.931734	1.14539	1.01656	1.16987	0.95001
P31009	40S ribosomal protein S2	RpS2	40.82	267	12	20	1.01279	1.03323	1.07911	1.00522	0.981623
O76927	40S ribosomal protein S21	RpS21	13.25	83	2	2	1.13464	0.727586	1.11439	0.897349	0.925677
Q8T3U2	40S ribosomal protein S23	RpS23	41.26	143	5	10	1.06041	0.997449	1.0805	1.12301	0.933905
Q9W229	40S ribosomal protein S24	RpS24	25.95	131	3	5	1.21113	0.796893	1.4553	0.650309	0.953657
P48588	40S ribosomal protein S25	RpS25	22.22	117	4	7	0.844678	1.03268	1.05985	1.10057	0.868978
P13008	40S ribosomal protein S26	RpS26	21.05	114	2	5	0.971989	0.904719	1.28752	1.02882	0.810205
Q9W334	40S ribosomal protein S28	RpS28b	49.23	65	3	7	1.14642	0.858202	1.22669	0.914335	0.936291
Q9VH69	40S ribosomal protein S29	RpS29	25	56	2	3	0.830309	1.08449	1.16028	1.16402	0.82382
Q06559	40S ribosomal protein S3	RpS3	46.34	246	12	27	0.997001	0.959748	1.26378	1.00301	0.863227
P55830	40S ribosomal protein S3a	RpS3A	49.25	268	13	25	0.875015	1.03652	1.15141	1.20991	0.809518
P41042	40S ribosomal protein S4	RpS4	36.4	261	9	14	0.892652	1.02695	1.2621	0.973755	0.858555
Q24186	40S ribosomal protein S5a	RpS5a	34.65	228	3	11	1.01345	0.887784	0.986724	1.18274	0.876363
P29327	40S ribosomal protein S6	RpS6	32.26	248	2	15	1.1051	0.987863	1.18488	1.01229	0.952575
Q9VA91	40S ribosomal protein S7	RpS7	44.33	194	8	13	0.91473	0.880312	1.13027	1.03169	0.830283
Q8MLY8	40S ribosomal protein S8	RpS8	46.63	208	9	15	0.998513	0.846458	1.26589	1.09796	0.780493
P55935	40S ribosomal protein S9	RpS9	49.74	195	3	20	1.15103	0.936183	1.59875	0.949557	0.81906
Q9VM71	5'-3' exoribonuclease 2 homolog	Rat1	4.52	908	3	3	0.949175	0.898199	1.05355	1.18826	0.824056
Q9VJZ4	AT12494p	ND-B22	11.81	144	2	2	2.60126	1.2167	0.821898	0.697897	2.51215
P28285	5-hydroxytryptamine receptor 2A	5-HT1A	4.68	834	2	2	0.950315	1.05228	0.764187	1.18716	1.02626
B7Z0Q1	5PtaseI, isoform F	5PtaseI	14.63	786	3	17	1.03131	1.13276	0.898003	1.18532	1.03876
Q9VXI6	Cytochrome b-c1 complex subunit 7	UQCR-14	19.82	111	2	9	2.92263	1.07996	0.910417	0.734207	2.43374
P19889	60S acidic ribosomal protein P0	RpLP0	39.75	317	11	25	0.972283	1.04529	1.08556	1.01705	0.959553
P08570	60S acidic ribosomal protein P1	RpLP1	70.54	112	4	14	1.21511	1.01653	1.23787	1.08262	0.961712
P05389	60S acidic ribosomal protein P2	RpLP2	66.37	113	6	12	0.929695	0.955396	1.12062	1.15506	0.828365
O61231	60S ribosomal protein L10	RpL10	47.71	218	10	15	1.07519	0.939489	1.2123	0.972013	0.922343
Q9VTP4	60S ribosomal protein L10a-2	RpL10Ab	39.63	217	8	13	1.15134	1.09755	1.0127	1.1327	1.04824
P46222	60S ribosomal protein L11	RpL11	23.91	184	5	9	1.05174	0.992569	1.20868	0.983717	0.932454
P41126	60S ribosomal protein L13	RpL13	37.16	218	11	27	1.08528	1.05629	1.00928	1.02942	1.05045
Q9VNE9	60S ribosomal protein L13a	RpL13A	40	205	8	26	1.03047	0.98849	1.09027	1.08531	0.928007
P55841	60S ribosomal protein L14	RpL14	43.37	166	8	20	1.00098	0.948034	1.24407	0.999021	0.868895
O17445	60S ribosomal protein L15	RpL15	15.69	204	4	4	0.942395	0.895693	1.28398	0.965138	0.81725
Q9W3W8	60S ribosomal protein L17	RpL17	24.19	186	6	15	1.13708	0.948053	1.25456	1.01072	0.920476
Q9VS34	60S ribosomal protein L18	RpL18	36.17	188	6	13	1.07809	0.90677	1.39962	0.963422	0.839961
P41093	60S ribosomal protein L18a	RpL18A	19.21	177	4	8	1.30975	0.988505	1.2998	1.01163	0.994301
P36241	60S ribosomal protein L19	RpL19	29.06	203	8	17	1.02759	0.87696	1.11147	0.991392	0.905694
P50887	60S ribosomal protein L22	RpL22	34.45	299	11	25	0.991272	1.00881	1.02733	1.10977	0.935882
P48159	60S ribosomal protein L23	RpL23	57.86	140	7	16	1.03179	0.969194	1.19546	0.91579	0.947769
Q9VJY6	60S ribosomal protein L24	RpL24	35.48	155	8	15	1.08109	1.05344	1.05844	1.00393	1.03498
Q9VBN5	60S ribosomal protein L27	RpL27	41.48	135	5	9	1.20656	0.992662	1.19185	1.02431	0.992358
P41092	60S ribosomal protein L27a	RpL27A	17.45	149	3	6	1.01898	0.927879	1.27155	1.01319	0.852115
Q9VZS5	60S ribosomal protein L28	RpL28	44.44	144	7	10	1.19021	0.968363	1.20353	1.07929	0.945577
O16797	60S ribosomal protein L3	RpL3	27.16	416	11	21	1.11884	1.00067	1.09511	1.0091	1.00727
Q9V597	60S ribosomal protein L31	RpL31	54.84	124	8	12	0.943571	0.958594	1.17968	1.04722	0.854175
P04359	60S ribosomal protein L32	RpL32	28.36	134	4	8	1.03424	0.804081	1.58756	0.944331	0.726065
P49630	60S ribosomal protein L36	RpL36	38.26	115	7	13	1.02186	0.960933	1.15411	0.997552	0.921514
Q9VMU4	60S ribosomal protein L37a	RpL37A	18.48	92	2	3	1.20787	0.691924	1.48526	0.827903	0.821298
Q9W5N2	60S ribosomal protein L38	RpL38	28.57	70	2	5	0.84101	1.19262	0.957983	1.27112	0.912308
P09180	60S ribosomal protein L4	RpL4	45.89	401	20	42	1.1051	0.983289	1.14967	0.99882	0.972027
Q9W5R8	60S ribosomal protein L5	RpL5	29.77	299	11	22	1.09942	1.01081	1.00849	1.02901	1.0357
P32100	60S ribosomal protein L7	RpL7	32.14	252	11	18	1.05906	0.963874	1.24372	0.987576	0.90662
P46223	60S ribosomal protein L7a	RpL7A	22.14	271	7	15	1.10872	0.907236	1.02766	1.0826	0.955313
Q9V3G1	60S ribosomal protein L8	RpL8	30.47	256	7	15	1.0356	0.88053	1.12188	1.00012	0.902984
P50882	60S ribosomal protein L9	RpL9	37.89	190	7	9	1.1439	1.03971	1.10989	0.856675	1.11037
P48611	6-pyruvoyl tetrahydrobiopterin synthase	pr	22.02	168	3	6	1.40184	0.967163	1.32572	0.91611	1.05673
Q9W197	7-methylguanosine phosphate-specific 5'-nucleotidase	cN-IIIB	36.99	319	10	11	0.990135	0.97759	0.991608	0.971905	1.00215
O77134	9 kD basic protein	ATPsynE	29.63	81	3	5	2.52673	1.22212	0.747896	0.818252	2.39367
Q9VK43	A16	A16	6.65	376	3	3	0.91642	0.952196	1.04194	1.02237	0.905202
Q0E8X7	Uncharacterized protein, isoform A	roh	30.49	82	4	6	2.52192	1.14676	0.872026	0.675023	2.3714
Q9V3W2	GM23292p	ND-B17	44.31	167	6	8	2.48799	1.19749	0.835078	0.760424	2.30992
P04755	Acetylcholine receptor subunit beta-like 1	nAChRbeta1	7.29	521	4	4	0.692365	0.957532	0.823657	1.32593	0.767541
Q9VJ12	Acinus, isoform A	Acn	22.87	739	16	22	1.18089	0.988583	0.930475	1.00216	1.12255
Q9VCV4	Aconitate hydratase	Irp-1A	27.72	902	13	33	1.08038	0.978471	1.11378	0.882812	1.03118
Q9VGZ3	Aconitate hydratase	Irp-1B	43.83	899	23	46	1.15931	0.998732	1.21669	0.865157	1.0366
Q9VTB4	NADH dehydrogenase (Ubiquinone) 13 kDa B subunit	ND-13B	46.77	124	5	8	2.36882	1.24042	0.806178	0.774071	2.28397
O97182	Actin related complex p41 subunit	Arpc1	23.87	377	8	13	1.04403	0.948393	1.02138	0.903273	1.03521
P02572	Actin-42A	Act42A	57.18	376	2	384	1.14213	1.03374	1.24251	0.918365	1.00694
P53501	Actin-57B	Act57B	51.86	376	2	276	1.08232	1.04919	0.99083	0.685582	1.27147
Q9VU68	Actin-interacting protein 1	flr	52.8	608	28	52	1.17593	0.998118	1.0941	0.892871	1.09416
P45889	Actin-related protein 1	Arp1	30.85	376	11	27	1.05641	1.03728	1.01822	0.999228	1.03779
Q9VWE8	Actin-related protein 10, isoform A	Arp10	15.87	378	6	8	0.957843	0.998687	1.11827	1.03745	0.907601
P45888	Actin-related protein 2	Arp2	35.09	399	11	18	1.06025	1.01821	0.976783	1.0507	1.02514
Q9VIM5	Actin-related protein 2/3 complex subunit 2	Arpc2	47.51	301	14	21	1.08706	0.977341	1.21882	0.955273	0.949546
Q9VF28	Actin-related protein 2/3 complex subunit 3	Arpc3A	18.64	177	3	5	1.0644	1.0894	0.979109	0.976109	1.10156
Q9VMH2	Actin-related protein 2/3 complex subunit 4	Arpc4	19.64	168	5	10	1.22831	1.00943	1.20184	0.911082	1.05907
Q9VQD8	Actin-related protein 2/3 complex subunit 5	Arpc5	50.33	151	7	10	0.973528	0.798862	1.0294	1.02719	0.861812
P32392	Actin-related protein 3	Arp3	34.93	418	12	24	1.01347	1.02003	1.01777	0.983672	1.01601
Q9VZI2	Activated Cdc42 kinase	Ack	8.39	1073	7	7	0.873809	0.983511	1.1465	1.07527	0.835963
Q7KSM5	Activator of SUMO 1	Aos1	44.21	337	10	16	1.1014	0.942087	1.06147	0.846737	1.07089
Q9V406	Activator protein 4	crp	10.46	631	6	7	0.978093	1.08439	0.843609	0.991134	1.12413
Q7K1U0	Activity-regulated cytoskeleton associated protein 1	Arc1	23.62	254	5	5	1.03489	0.986496	1.23356	1.03481	0.891115
Q9VMS1	Cyclope, isoform A	cype	41.56	77	4	10	2.59197	1.17065	0.854227	0.793537	2.28347
P42281	Acyl-CoA-binding protein homolog	Dbi	73.26	86	4	5	0.955635	0.850017	1.01899	1.02419	0.883746
Q9VIX4	Acyl-coenzyme A oxidase	CG17544-RA	13.56	693	7	9	1.04125	0.895846	1.05199	0.901838	0.991437
O62531	Adaptor protein complex 1, mu subunit	AP-1mu	20.42	426	7	8	0.920852	1.00892	1.10005	0.991158	0.922803
O62530	Adaptor protein complex 2, mu subunit, isoform A	AP-2mu	34.55	437	15	31	0.937774	1.01839	0.777627	0.998164	1.10157
Q9VDC3	Adaptor protein complex 2, sigma subunit	AP-2sigma	37.32	142	5	10	0.86582	0.950313	0.963251	1.11284	0.874787
Q9VFS1	Adenosine deaminase-related growth factor D	Adgf-D	23.11	502	12	21	1.09827	0.954748	0.895573	0.990378	1.08858
Q27580	Adenosylhomocysteinase	Ahcy13	25.23	432	2	19	1.17938	0.972449	1.17891	0.921236	1.02461
Q9VZX9	Adenosylhomocysteinase	AhcyL1	39.73	521	15	33	1.21925	1.00602	0.993335	0.95087	1.14456
Q9U915	Adenylate kinase	Adk2	62.08	240	15	34	1.25413	1.10188	0.905567	0.907542	1.29943
Q9VEP6	Adenylosuccinate lyase	AdSL	22.45	481	10	13	1.0195	0.980874	1.08546	1.05795	0.933269
Q9Y0Y2	Adenylosuccinate synthetase	AdSS	41.16	447	17	34	1.13345	0.979193	1.12246	0.922457	1.03312
Q9VPX6	Adenylyl cyclase-associated protein	capt	24.39	783	2	38	0.86006	0.936604	0.704164	1.20348	0.941824
Q7PLI0	Adherens junction protein p120	p120ctn	9.35	781	6	6	0.823979	1.06068	0.778832	1.11198	0.996745
P61855	Adipokinetic hormone	Akh	37.97	79	2	2	0.682226	0.82923	1.47928	1.42996	0.519536
P61209	ADP-ribosylation factor 1	Arf79F	39.01	182	5	43	0.992615	0.955841	1.09915	0.921777	0.964138
P40945	ADP-ribosylation factor 2	Arf102F	32.22	180	3	14	0.966563	0.96824	1.22905	0.988716	0.87241
P40946	ADP-ribosylation factor 3	Arf51F	15.43	175	2	7	0.947905	1.30029	0.764294	0.8163	1.42237
P25160	ADP-ribosylation factor-like protein 1	Arl1	14.44	180	2	2	1.03874	0.805872	1.43432	0.962705	0.769542
Q06849	ADP-ribosylation factor-like protein 2	Arl2	19.57	184	2	5	1.14076	0.994184	0.810658	1.10336	1.11542
Q9VHV5	ADP-ribosylation factor-like protein 8	Gie	28.49	186	5	12	0.902771	1.02209	0.986705	0.98937	0.974081
P91929	NADH dehydrogenase [ubiquinone] 1 alpha subcomplex subunit 10, mitochondrial	ND-42	25.8	407	11	18	2.57774	1.15607	0.817545	0.848206	2.24152
Q7JWW6	Ady43A	Ady43A	18.31	366	5	5	0.706094	1.0223	0.855177	1.11816	0.875874
Q9VU95	Alanine--glyoxylate aminotransferase 2-like	CG8745	15.18	494	6	8	1.01395	0.97666	1.15781	0.986239	0.928436
Q9VLM8	Alanine--tRNA ligase, cytoplasmic	Aats-ala	38.1	966	31	47	1.06684	0.997051	1.00296	0.955487	1.05384
P00334	Alcohol dehydrogenase	Adh	89.45	256	15	145	1.07704	0.857009	1.3345	0.989464	0.83222
P46415	Alcohol dehydrogenase class-3	Fdh	28.23	379	11	14	1.22932	0.963188	1.11487	0.866115	1.10678
Q9VLC5	Aldehyde dehydrogenase	Aldh	35.96	520	16	49	1.3589	0.899669	1.28903	0.941084	1.01276
Q9VF51	Aldehyde oxidase 3, isoform A	AOX3	14.19	1254	12	12	1.09703	0.940298	1.18216	0.879426	0.988232
Q9VRU1	Aldose 1-epimerase	CG10467-RA	23.63	364	7	8	1.08118	0.876026	1.1319	0.96197	0.934728
Q9VB05	ALG-2 interacting protein X	ALiX	27.51	836	25	35	0.759641	1.11889	0.932508	1.18953	0.885251
Q24238	Alkaline phosphatase 4	Aph4	4.7	596	2	2	1.01282	1.08814	0.987338	1.22735	0.948649
Q6NN40	Alpha N-terminal protein methyltransferase 1	Ntmt	9.78	276	2	2	0.642426	0.938423	1.04762	0.954545	0.78957
Q9VYV5	Alpha-(1,6)-fucosyltransferase	FucT6	12.6	619	7	7	0.806811	1.1293	0.886963	1.27307	0.896333
Q9VF33	Alpha-mannosidase	alpha-Man-IIb	4.72	1249	5	5	0.816257	1.05265	1.1149	1.12242	0.83533
Q23983	Alpha-soluble NSF attachment protein	alphaSnap	63.7	292	19	75	1.0407	0.976631	0.963511	0.977339	1.0394
Q9VSY4	Alpha-tubulin N-acetyltransferase 1	CG3967	39.7	461	6	48	0.969286	1.00123	0.967572	1.06164	0.97107
O77062	Amino acid transporter	Eaat1	16.08	479	6	29	1.02932	0.971514	0.639516	1.14481	1.12134
Q9I7K3	Aminoacylase-1	CG6465	25.19	401	8	11	1.07154	0.992277	1.19577	1.06524	0.912786
Q9VCR2	Aminoacylase-1	CG6726	15.96	401	5	6	1.14743	0.835564	1.27541	0.861324	0.928046
Q9VKR4	Aminomethyltransferase	CG6415	9.14	405	2	2	1.12188	0.37797	3.07986	1.87091	0.302953
Q9VJG0	Aminopeptidase P	ApepP	27.57	613	17	26	1.21167	0.913591	1.04818	0.84694	1.12144
Q9VBC7	Amontillado	amon	23.09	654	13	21	1.17283	1.00569	0.934195	1.00159	1.1254
O18645	AMP-activated protein kinase alpha subunit, isoform A	AMPKalpha	6.19	582	3	3	0.637213	1.00413	1.06252	1.02733	0.785389
Q7KLE5	Amphiphysin	Amph	30.4	602	2	28	0.996284	0.936621	0.904353	1.088	0.970164
Q9VYV4	Amun, isoform A	Amun	13.27	550	5	5	1.02236	1.09587	0.932969	1.09847	1.04272
Q9V3Y2	Anamorsin homolog	CIAPIN1	34.27	248	6	9	1.10456	0.891556	1.15983	0.90534	0.966561
Q7KJ08	Anaplastic lymphoma kinase, isoform A	Alk	6.64	1701	9	10	0.993329	0.89394	0.775266	1.05939	1.02868
Q9VRL0	Cytochrome c1, isoform A	Cyt-c1	18.57	307	6	14	2.35042	1.20911	0.77495	0.822064	2.22887
Q9VLJ6	Angiotensin-converting enzyme-related protein	Acer	3.17	630	2	2	1.12561	0.98261	1.0879	1.01593	1.00209
Q0KIE7	Ankyrin, isoform B	Ank	22.98	1549	28	49	1.02479	0.964784	0.83198	1.09082	1.03472
A0A0B4KH34	Annexin	AnxB9	38.27	324	2	30	1.07373	0.995274	1.2622	0.957388	0.932155
P22465	Annexin B10	AnxB10	69.47	321	19	68	1.06245	0.915486	1.16843	0.937694	0.939132
Q9VXG4	Annexin B11	AnxB11	25.05	511	11	13	1.05885	0.941887	1.40514	0.944419	0.851538
O16043	Anon1A4	Df31	57.92	183	14	25	1.04261	1.11257	0.916604	0.997695	1.12583
Q24050	Anon-i1 protein	anon-i1	11.07	262	2	2	0.93341	1.00955	0.990539	0.974205	0.988913
Q94546	Another transcription unit protein	Atu	1.79	725	2	2	0.977013	1.12997	0.929924	1.05046	1.06393
Q9VN55	Antimeros, isoform A	atms	15.8	538	6	6	0.820532	0.931726	0.998589	1.01079	0.872039
Q24253	AP complex subunit beta	AP-1-2beta	41.48	921	34	80	0.98407	0.994395	0.880153	1.00564	1.04914
P91926	AP-2 complex subunit alpha	AP-2alpha	38.4	940	33	78	0.882891	0.991921	0.820749	1.03595	1.00976
Q9W4K1	AP-3 complex subunit beta	rb	4.91	1160	6	6	1.00272	0.931978	1.28301	0.997283	0.848446
Q9V496	Apolipophorins	Rfabg	11.4	3351	39	48	1.13869	0.853808	1.24453	1.08241	0.856273
Q9V431	Apoptosis inhibitor 5 homolog	Aac11	28.36	536	13	18	1.06862	0.935788	1.26371	0.926495	0.915166
Q9VDT1	Arc42	Arc42	26.17	405	10	14	1.6295	0.892851	1.15344	0.801213	1.29043
Q9VGQ8	Arfaptin	Arfip	20	355	6	6	0.835644	0.915032	1.13481	1.05868	0.798125
P48610	Arginine kinase	Argk	72.75	356	2	441	1.19405	1.01567	0.943026	1.06911	1.09819
A8JNP2	Arginine kinase, isoform E	Argk	70.13	375	2	447	1.38969	1.04877	0.82878	0.953496	1.36818
Q9VGW7	Arginine methyltransferase 1	Art1	15.16	376	4	7	1.09701	1.01839	1.05622	0.948919	1.05499
Q8SX32	Arginine methyltransferase 8	Art8	7.04	341	2	2	0.964676	0.804958	1.31077	0.973987	0.774539
Q9VES1	ARL-6-interacting protein 1 homolog	CG10326	24.37	197	4	8	1.12895	0.900402	1.09404	0.91404	1.01059
Q7K486	Armadillo repeat-containing protein 6 homolog	CG5721	17.46	464	7	9	1.14196	1.00399	0.996022	0.897119	1.13354
P18824	Armadillo segment polarity protein	arm	17.32	843	12	15	0.973826	1.21112	0.815968	1.00025	1.20302
P05031	Aromatic-L-amino-acid decarboxylase	Ddc	30.78	510	12	23	1.10764	0.882728	1.16422	0.93183	0.949579
Q9VMG0	Arylalkylamine N-acyltransferase-like 2, isoform A	AANATL2	27.78	216	5	6	1.00746	0.845705	1.28548	0.826964	0.877259
Q9V434	Asparaginyl-tRNA synthetase, isoform A	AsnRS	32.8	558	18	24	0.978857	0.985208	1.01501	1.05636	0.948196
Q7K0E6	Aspartyl-tRNA synthetase, isoform A	AspRS	22.22	531	7	9	1.20896	0.984543	1.21849	0.958926	1.00739
Q9VBR3	Astrocytic leucine-rich repeat molecule	alrm	16.56	471	9	11	0.982745	0.918572	1.04555	0.926954	0.963909
Q7K3V6	AT01345p	CG12736	14.04	456	6	7	1.50214	0.997132	1.00288	0.81207	1.37705
Q94516	ATP synthase subunit b, mitochondrial	ATPsynB	33.33	243	13	25	2.58624	1.04078	0.960819	0.669187	2.22515
Q9VBC4	AT02583p	CG6420	2.2	909	2	2	0.96484	1.02228	0.822607	1.03868	1.0676
Q9VEB7	AT04491p	CG14314	17.12	438	5	5	0.738954	1.17617	0.920315	1.19147	0.906879
Q9VDV2	AT06125p	CG6195	32.23	363	11	17	0.902071	1.03961	1.02575	1.09591	0.915167
Q7JWU9	AT07420p	CG14480	17.27	249	4	4	1.03276	1.00485	0.984581	1.014	1.01953
Q8T4A9	AT07738p	Rrp45	3.4	412	2	2	1.04129	0.898777	1.26305	0.905579	0.894604
Q24171	AT08303p	ksr	1.35	966	2	2	0.772784	0.664127	1.16581	1.02474	0.655959
Q9VRP3	AT08565p	Txl	35.54	287	7	11	1.06679	0.855571	1.10829	1.01129	0.906953
O97418	EG:152A3.7 protein	ND-B14.5A	45.63	103	5	6	2.40253	1.20963	0.826701	0.813544	2.20221
Q9VXF9	AT13091p	rngo	15.28	458	5	5	0.964863	1.00827	0.991802	1.08119	0.951827
Q9VPP7	AT13539p	CG11885	11.35	141	2	3	0.675165	1.14985	1.00663	1.34775	0.775157
Q9W402	NADH dehydrogenase (Ubiquinone) B16.6 subunit, isoform A	ND-B16.6	35.06	154	5	11	2.50924	1.08279	0.923541	0.71892	2.18698
Q9VN86	AT14148p	CG2604	7.91	430	4	5	0.926969	1.00293	0.997083	1.25638	0.856414
Q9VZJ9	AT15655p	Mul1	4.73	338	2	2	1.17486	0.974307	1.04945	0.866502	1.12172
Q9VT59	AT16804p	CG10809	5.31	358	2	3	0.937635	1.14376	0.724153	1.09399	1.14479
Q9VIQ8	Cytochrome c oxidase subunit 4, isoform A	COX4	23.63	182	4	15	2.24705	1.11885	0.777184	0.7636	2.18454
Q9VC66	AT25567p	CG6607	28.33	406	13	17	1.00916	1.11735	1.01677	0.990923	1.05918
Q9VFT4	AT27578p	rin	19.86	690	12	15	1.00542	0.994611	0.808738	1.04856	1.07685
Q9VGH5	AT27789p	glo	26.79	586	11	26	0.973621	1.01294	1.00699	0.991415	0.994074
Q9VK99	Atilla, isoform B	atilla	13.29	143	2	2	1.12276	0.989421	0.606625	1.01069	1.30598
Q9VC57	Atlastin	atl	6.28	541	4	5	0.78407	0.988209	0.924673	1.31737	0.790474
P21914	Succinate dehydrogenase [ubiquinone] iron-sulfur subunit, mitochondrial	SdhB	24.92	297	7	12	2.62322	1.00138	0.998617	0.66698	2.17616
Q9VQR2	CG8844 protein	ND-PDSW	44.65	159	7	11	2.27124	1.15584	0.816181	0.767665	2.16377
Q9VGS3	RH44771p	SdhC	14.04	171	4	4	2.24126	1.08651	0.920381	0.63612	2.13798
Q24251	ATP synthase subunit d, mitochondrial	ATPsynD	60.67	178	13	53	2.4237	1.05954	0.943805	0.700159	2.11881
Q9W141	Putative ATP synthase subunit f, mitochondrial	CG4692	49.53	107	6	11	2.08058	1.19982	0.833455	0.717701	2.11481
Q24407	ATP synthase-coupling factor 6, mitochondrial	ATPsynCf6	50	106	6	32	2.36012	1.00264	0.997362	0.609643	2.09257
Q6IDF5	NADH dehydrogenase (Ubiquinone) B15 subunit	ND-B15	23.89	113	4	5	2.20165	1.14102	0.747419	0.876411	2.05851
Q9VXK7	LD31474p	ND-20	17.19	221	2	6	2.12788	1.13614	0.831367	0.757761	2.05397
Q7JWD3	ATPase ASNA1 homolog	CG1598	21.43	336	5	6	1.05659	0.936187	1.11515	0.948196	0.965798
Q7KN85	ATP-citrate synthase	ATPCL	51.44	1112	2	137	0.873953	0.979175	1.19117	1.02127	0.837594
Q9VVW8	ATP-dependent (S)-NAD(P)H-hydrate dehydratase	CG10424	13.67	300	4	5	1.50791	0.903803	1.39789	0.772703	1.11108
P52034	ATP-dependent 6-phosphofructokinase	Pfk	46.32	788	2	102	1.23174	0.748382	1.86292	0.752236	0.757169
Q9V9T4	ATP-dependent chromatin assembly factor large subunit	Acf	1.02	1476	2	2	0.915894	0.912697	0.910281	1.04807	0.933741
Q9VXZ0	GEO07190p1	ND-B18	18.8	117	2	2	2.15015	1.02347	0.937008	0.636561	2.01682
Q9V3C0	ATP-dependent RNA helicase abstrakt	abs	5.33	619	3	3	0.958672	1.08158	1.01906	1.18497	0.925689
Q9VNV3	ATP-dependent RNA helicase Ddx1	Ddx1	10.45	727	5	5	0.999097	1.0009	1.02909	0.994755	0.988218
Q27268	ATP-dependent RNA helicase WM6	Hel25E	44.1	424	9	40	0.968827	0.946554	1.00703	1.12334	0.899082
Q9W3R7	Autophagy protein 5	Atg5	24.16	269	6	8	0.94526	1.22738	0.946747	0.987709	1.12313
Q7JY94	Autophagy-related 7, isoform A	Atg7	30.41	684	4	23	1.22029	1.01776	1.23332	0.953482	1.02343
Q9VVS6	Autophagy-related protein 3	Atg3	10.61	330	3	4	0.977627	1.02288	1.0309	0.930151	1.02012
Q9VJX3	B4, isoform A	B4	3.61	1107	4	4	0.86527	0.921359	0.967651	1.12989	0.851772
Q9W258	Babos, isoform A	babos	19.9	196	4	5	0.977141	1.01786	0.982454	0.949093	1.03285
Q9VQF7	Bacchus	Bacc	34.21	152	6	38	1.13168	1.18572	0.862958	1.02758	1.22579
Q7K204	Barricade, isoform A	barc	12.59	556	6	7	0.9867	1.01346	1.06627	1.09423	0.925783
Q9VLU0	Barrier-to-autointegration factor	baf	27.78	90	2	4	1.02271	0.797471	1.0919	0.83331	0.945446
Q24439	ATP synthase subunit O, mitochondrial	ATPsynO	59.81	209	14	50	2.38024	1.02237	0.978122	0.710962	2.01447
Q9VAY6	BCAS2 ortholog	BCAS2	6.83	278	2	2	1.05661	0.940139	0.987478	1.01268	0.998296
O01666	ATP synthase subunit gamma, mitochondrial	ATPsyngamma	52.19	297	15	50	2.45138	0.950185	1.05243	0.653856	1.99355
Q9Y165	BcDNA.GH02435	morgue	10.39	491	5	5	0.839756	1.21609	0.95214	1.19946	0.955498
Q9Y162	BcDNA.GH02678	Vps4	37.56	442	18	23	0.785415	1.06956	0.917669	1.17882	0.884801
Q7JZK1	NADH dehydrogenase (Ubiquinone) B14 subunit, isoform A	ND-B14	20.97	124	4	6	2.22712	0.97875	1.01404	0.596139	1.99101
Q7KMM4	BcDNA.GH04962	GCS2alpha	27.06	924	25	34	1.06275	1.02104	1.07589	1.03426	0.987508
Q9Y128	BcDNA.GH07688	cert	16.47	601	5	10	0.945255	1.04493	1.08768	0.957004	0.973345
Q9Y114	BcDNA.GH10229	BcDNA.GH10229	25	656	15	19	0.80242	1.00494	0.834377	1.272	0.858039
Q9Y112	BcDNA.GH10614	BcDNA.GH10614	51.27	316	13	26	1.07404	0.85762	1.20443	0.973947	0.886742
Q9Y110	BcDNA.GH10711	BcDNA.GH10711	2.96	675	2	2	0.771855	0.998192	0.929542	1.12289	0.862415
Q7KMJ6	BcDNA.GH11110	nito	17.91	793	13	21	0.968433	1.03147	0.97171	1.01658	1.00584
Q9V3D9	BcDNA.GM09489	Srp54k	17.52	508	7	7	0.793227	1.05299	0.951895	1.06273	0.916406
Q9V3N7	BcDNA.HL02693	CRMP	54.5	589	7	108	1.02107	1.09224	0.894472	1.12456	1.04669
Q7KLW9	BcDNA.LD02793	Prp19	23.56	505	10	13	1.09367	0.972547	1.04067	1.02823	0.998705
Q8IN02	BcDNA.LD12153	Dph5	11.74	281	2	3	1.20679	0.944471	1.18346	0.771754	1.10027
Q9V466	BcDNA.LD18761	Nup107	13.49	845	11	12	0.80511	0.857306	1.05451	0.948303	0.830038
Q8I077	BcDNA.LD22910	Usp1	3.53	1078	4	4	0.868303	1.00369	0.996325	1.11866	0.88511
Q9V3Y5	BcDNA.LD23634	BcDNA.LD23634	14.53	998	14	16	0.886058	1.00902	0.812278	1.00984	1.04004
Q9Y0Z1	BcDNA.LD23876	BcDNA.LD23876	3.08	1658	5	7	0.744371	1.03188	0.955724	1.14661	0.844895
Q7KMH9	BcDNA.LD26050	wde	8.52	1420	10	11	1.02279	1.06284	0.876707	1.02699	1.09557
Q9V3H9	BcDNA.LD27873	Nab2	5.18	1004	4	4	1.05004	1.08638	0.928002	1.00385	1.10589
Q9Y0Y5	BcDNA.LD29885	epsilonCOP	19.93	306	6	7	0.822125	1.00409	0.995931	1.02027	0.905766
Q7KMH5	BcDNA.LD29892	Smyd4-4	2.79	573	2	2	0.987266	0.72253	0.92441	0.676857	1.06778
Q9VB23	BcDNA.LD34343	wdb	16.98	524	8	15	0.795591	0.897008	0.967206	1.09034	0.822629
O76857	BCL7-like	BCL7-like	18.18	154	3	4	1.01156	1.00688	1.02535	0.911609	1.04207
Q9VHH8	Beag	beag	17.24	557	8	11	0.992996	0.975102	1.00705	1.06171	0.951341
Q9VBC9	Beat-VII	beat-VII	10.06	517	4	7	0.942818	1.08248	0.965809	1.11702	0.97238
Q9VCE1	Beclin-1-like protein	Atg6	7.82	422	3	3	0.86217	0.998042	0.972904	1.06059	0.914787
Q9VSY8	BET3 ortholog	Bet3	20.79	178	4	8	0.813919	1.04322	1.11297	0.987156	0.884299
M9PF16	Beta spectrin, isoform B	beta-Spec	48.87	2308	4	183	0.725987	1.07211	0.595024	1.78335	0.756021
Q9XZ68	Beta subunit of type II geranylgeranyl transferase	betaggt-II	16.71	347	6	6	1.28053	0.943996	1.65983	0.809677	0.900799
Q9VI04	Beta-alanine synthase	pyd3	26.68	386	7	7	1.12419	0.78446	1.28702	0.931025	0.860512
Q9VGE7	Beta-galactosidase	Ect3	4.24	637	2	2	1.28955	0.93649	1.96294	0.918652	0.772504
Q9VLS9	Beta-lactamase-like protein 2 homolog	CG12375	21.58	292	5	6	1.10032	0.864362	1.03884	0.854493	1.03768
Q9VKM3	ATP synthase, isoform A	ATPsynG	37.37	99	4	9	2.3902	1.01281	0.987349	0.732916	1.97819
P28668	Bifunctional glutamate/proline--tRNA ligase	Aats-glupro	17.44	1714	29	37	1.01598	1.0308	1.05039	1.09181	0.955456
Q9VRP4	Bifunctional phosphopantetheine adenylyltransferase-Dephospho-CoA kinase	Ppat-Dpck	14.29	518	7	9	1.00192	0.88556	1.03813	0.956001	0.946515
Q9VTE0	Biogenesis of lysosome-related organelles complex 1 subunit 2	Blos2	22.01	159	3	4	1.0272	1.1876	0.973522	1.08566	1.07557
Q8IR45	BLOC-1-related complex subunit 8 homolog	CG32590	26.23	183	4	5	0.971548	0.947738	0.992375	1.05721	0.936427
Q9VML2	Blue cheese	bchs	19.49	3489	63	87	0.769306	0.903805	0.967867	1.0332	0.83611
Q94513	Boundary element associated factor	BEAF-32	25.18	282	3	10	1.01415	1.07404	0.717844	0.986043	1.22555
Q9W384	Brahma associated protein 111kD	Bap111	16.96	749	10	13	0.996796	1.07801	0.990361	1.07122	1.00642
Q9VF03	Brahma associated protein 155 kDa	mor	27.46	1209	2	48	0.802954	1.23733	0.822469	1.13909	1.04013
A1Z6M0	Brahma associated protein 170kD	Bap170	8.06	1688	10	10	0.959385	1.00056	1.06863	0.9202	0.985477
Q7K012	Brahma associated protein 55kD	Bap55	26.12	425	10	20	0.920234	1.10505	0.936285	1.02071	1.03489
Q9VYG2	Brahma-associated protein of 60 kDa	Bap60	24.85	515	12	17	0.75351	1.00776	0.975753	1.01865	0.88311
Q9VEL2	Brf, isoform A	Brf	2.87	662	2	2	0.712916	0.999519	1.00048	1.1091	0.811744
Q9VDE4	Bride of doubletime	Bdbt	11.54	286	3	4	1.03041	0.920715	1.12179	0.970489	0.932536
Q9VYI2	BRMS1 ortholog	Brms1	8.11	259	3	3	0.771205	1.03193	0.962919	1.10436	0.872228
Q9VAM5	Bromodomain containing 8	Brd8	3.56	872	2	2	1.00866	0.830615	0.936178	1.00514	0.947436
Q9VAJ2	Bub3, isoform A	Bub3	12.58	326	3	3	0.956835	1.166	1.00487	0.995156	1.06141
M9PCT7	Bunched, isoform O	bun	38.02	192	2	12	1.08076	1.08941	0.937022	1.04142	1.09691
Q9VIE7	Burgundy, isoform B	bur	22.99	683	13	19	0.981576	0.934753	1.08593	1.01877	0.9105
Q9W350	C11.1, isoform A	c11.1	14.29	1742	23	27	0.788692	1.0008	0.963883	1.0608	0.883842
P05990	CAD protein	r	6.12	2224	11	12	0.869818	0.991612	1.05456	0.861747	0.971365
P41044	Calbindin-32	Cbp53E	70.97	310	24	198	1.08136	1.0242	1.00554	0.938402	1.08314
Q95T12	Calcium channel flower	fwe	24.23	194	3	3	0.893059	1.02751	0.87237	1.38942	0.849139
Q9VMU0	NADH dehydrogenase [ubiquinone] iron-sulfur protein 6, mitochondrial	ND-13A	25.4	126	3	5	2.45863	1.04454	0.957361	0.815913	1.97554
O16158	Calcium-binding protein	Scp2	53.26	184	9	59	1.12148	0.973608	1.1214	0.938624	1.01702
Q9NHE5	Calcium-dependent secretion activator	Cadps	27.57	1447	37	62	0.772501	1.08521	0.82872	1.11279	0.956838
Q59DP9	Calcium-transporting ATPase	PMCA	25.02	1255	2	56	0.898173	1.02694	0.852552	1.10697	0.982438
P62152	Calmodulin	Cam	73.83	149	14	249	1.09197	0.966916	1.00438	1.08589	0.984981
Q9VT65	Calpain-B	CalpB	11.78	925	8	11	1.00415	0.88132	1.10819	0.995865	0.896115
Q02910	Calphotin	Cpn	1.5	864	2	3	1.27996	1.0658	0.963679	1.03769	1.17208
P29413	Calreticulin	Crc	47.54	406	17	53	1.18512	1.12013	1.05561	0.96524	1.14073
P12370	cAMP-dependent protein kinase catalytic subunit	Pka-C1	47.59	353	23	64	0.983472	1.0469	0.913091	1.02679	1.04665
P81900	cAMP-dependent protein kinase type II regulatory subunit	Pka-R2	58.36	377	21	145	0.971919	1.04797	0.949288	1.04665	1.012
Q9W4T4	cAMP-specific 3',5'-cyclic phosphodiesterase, isoform I	dnc	20.84	1209	3	27	0.807215	1.01905	0.721325	1.24877	0.926994
Q9VM49	Caper, isoform A	Caper	10.27	594	5	5	0.86989	1	1.02376	1.1053	0.87827
Q9I7D3	Caprin homolog	Capr	15.61	961	13	19	1.01768	1.11891	0.940623	1.15295	1.02055
Q9W4N2	Cap-specific mRNA (nucleoside-2'-O-)-methyltransferase 1	CG6379	7.11	788	4	4	0.981118	0.939751	0.93779	1.10219	0.941609
Q9UAS6	Cap-specific mRNA (nucleoside-2'-O-)-methyltransferase 2	cmtr2	4.71	700	2	2	1.05437	0.948437	1.39135	0.637588	0.987117
Q9V396	Carbonic anhydrase 1	CAH1	50.74	270	12	26	1.00224	0.77057	1.37142	0.921229	0.77326
Q9VIB5	Carboxylic ester hydrolase	alpha-Est7	6.99	572	4	4	0.943668	1.03996	1.31874	1.37397	0.736666
Q9VDT5	Carboxypeptidase	CG4572-RC	9.96	482	4	7	1.21371	0.979281	0.933456	1.02116	1.12196
Q9VIK2	Carcinine transporter	CarT	3.41	674	2	3	0.691601	0.735221	0.449981	1.01374	0.974789
Q9NIP6	Cardio acceleratory peptide 2b	Capa	26.49	151	4	6	0.892834	0.956107	1.02678	1.46196	0.742925
Q9VFS2	Carotenoid isomerooxygenase	ninaB	4.03	620	2	2	0.842809	0.927244	0.964867	1.13573	0.842644
P54367	Casein kinase I isoform alpha	CkIalpha	11.28	337	4	7	0.915053	0.79532	0.855463	1.06445	0.89086
P08181	Casein kinase II subunit alpha	CkIIalpha	32.14	336	10	17	1.09515	0.959302	1.18282	0.80612	1.03294
P17336	Catalase	Cat	27.67	506	10	15	1.09932	0.773735	1.09167	0.980362	0.903968
P35220	Catenin alpha	alpha-Cat	14.18	917	6	13	0.848851	0.959662	0.887218	1.3708	0.800928
Q7K485	CathD	cathD	26.79	392	8	15	1.24451	0.982087	1.14484	0.899883	1.08895
Q9VY87	Cathepsin B1, isoform A	CtsB1	14.41	340	4	5	1.24485	0.779934	1.25862	0.61506	1.08065
Q9VKJ6	Cation-transporting ATPase	CG6230-RA	4.57	1225	5	5	0.736334	0.844893	1.01973	1.0603	0.760196
Q9VSK2	Cbl long isoform	Cbl	7.52	878	3	7	0.744804	0.96193	1.0044	1.14625	0.793588
Q8T8R1	CCHC-type zinc finger protein CG3800	CG3800	55.76	165	9	20	1.00694	0.89726	0.993111	0.965571	0.972182
O97062	Ccp84Ae	Ccp84Ae	26.44	208	4	6	0.889092	0.939442	0.897783	0.733441	1.12096
O97064	Ccp84Ag	Ccp84Ag	11.52	191	2	2	0.863863	0.969374	1.01198	0.805584	1.00862
Q9V3G6	CCR4-NOT transcription complex subunit 10	Not10	4.57	635	2	2	0.917757	0.86998	0.976992	1.00441	0.902259
Q9VZL5	Ccz1 ortholog	Ccz1	10.72	485	4	5	1.00747	0.885566	1.37171	0.992589	0.800673
Q9VKV5	CD2 antigen cytoplasmic tail-binding protein 2 homolog	holn1	21.63	319	6	7	1.05753	0.947097	1.00272	0.920485	1.04234
P40793	Cdc42 homolog	Cdc42	31.41	191	4	10	1.05913	0.982891	0.591031	1.01741	1.26957
Q9VAI6	General odorant-binding protein 99b	Obp99b	12.75	149	2	2	2.75542	1.0156	0.984644	0.928094	1.97153
Q7KPG8	CDK7/cyclin H assembly factor MAT1	Mat1	7.19	320	2	2	0.913116	0.986049	1.05465	1.06147	0.897478
Q8SX37	CDP-diacylglycerol--inositol 3-phosphatidyltransferase	Pis	8.48	224	2	3	0.884037	0.723998	1.23274	0.974833	0.728418
Q9VKB2	Ced-12	Ced-12	14.64	724	9	9	0.771366	0.857421	0.978911	1.06403	0.797276
Q9W0R0	Cell division cycle 5 ortholog, isoform A	Cdc5	17.81	814	13	15	0.978416	1.09543	0.978584	1.02188	1.03668
Q9VCQ6	Centaurin beta 1A	CenB1A	11.11	828	3	8	0.741004	0.862428	1.05099	1.15909	0.725505
Q9VIK6	Centrocortin, isoform A	Cen	24.05	790	16	20	0.938529	1.07841	0.837493	1.12509	1.0277
Q9W4X9	Centromere/kinetochore protein zw10	Zw10	2.08	721	2	2	0.752104	1.03437	0.807187	1.26397	0.862552
Q24478	Centrosome-associated zinc finger protein CP190	Cp190	36.86	1096	31	41	0.869149	1.09572	0.825136	1.07049	1.03653
Q9VQV7	Cep97, isoform B	Cep97	26.8	806	12	23	0.931502	1.00571	0.856978	1.08328	0.998433
Q9VF70	Cerebral cavernous malformation 3 ortholog	Ccm3	13.94	208	3	4	0.74764	0.976402	1.02417	1.11028	0.807722
Q9VM69	CG10206-PA	nop5	28.77	511	10	14	1.00531	1.03455	0.994717	0.873735	1.09174
Q9VJ31	CG10623 protein	CG10623	16.92	331	5	5	1.04759	0.834938	1.11469	0.790286	0.988216
Q9VI53	CG1105	CG1105	13.03	422	5	8	0.997357	0.995391	0.829004	1.1695	0.99712
Q9VNG2	CG1109, isoform A	CG1109	6.32	807	5	5	0.901556	0.893312	1.03406	0.942499	0.908076
O76752	CG12117-PA	Sptr	44.06	261	10	17	1.00921	0.919179	1.06858	1.06498	0.90384
Q7JVN6	CG1213, isoform A	CG1213	4.89	491	2	4	1.07703	0.990124	1.00997	0.775998	1.15744
Q9VI84	CG1227, isoform A	CG1227	5.94	320	2	2	0.912218	1.02461	1.09642	1.11642	0.875268
Q8I725	CG1236	CG1236	40.35	347	12	25	1.40783	0.94114	1.17926	0.898314	1.13063
Q9VZF1	CG1309	CG1309	10.31	524	5	6	0.861388	1.14118	0.775202	1.23266	0.997363
Q9VZE4	CG1316	CG1316	27.23	470	12	17	0.811014	1.06371	0.986643	1.02633	0.931318
Q29QP4	CG13178	OSCP1	6.95	302	2	2	0.998532	0.956983	1.48928	1.00147	0.785111
M9PDU4	Acyl carrier protein	ND-ACP	11.05	181	2	11	2.08335	1.05049	0.951939	0.65502	1.95016
A1Z843	CG1371	CG1371	7.84	1199	8	9	0.821278	1.01526	0.896612	1.19407	0.878438
Q9V9Q4	CG1416, isoform A	CG1416	25.99	354	8	9	0.910443	1.02883	1.0463	1.21315	0.858295
Q9W3N1	CG1444	spidey	22.12	321	5	6	0.657698	1.00954	0.845263	1.20041	0.815007
Q9VRG8	CG1486, isoform A	CG1486	16.08	852	10	11	0.752991	0.885899	1.02021	1.08312	0.779188
Q9VRE0	CG1518, isoform A	CG1518	5.33	713	4	4	0.832775	1.12214	0.802534	1.26767	0.944313
Q9VRD4	CG1532, isoform A	CG1532	37.15	288	8	11	1.12029	0.848845	1.2493	0.85257	0.936846
Q7JVG6	CG1550	CG1550	3.99	626	3	3	0.85199	0.987915	1.03633	1.01223	0.898146
Q7KV34	CG1561	CG1561	25.35	635	13	16	1.54447	0.881841	1.34216	1.00103	1.03548
Q9VYG8	CG15717-PA	CG15717	13.49	252	2	2	1.11589	0.805576	0.947129	0.801641	1.09875
Q8MRI4	CG1578, isoform A	CG1578	6.55	901	5	6	1.01198	0.988161	1.02533	0.896449	1.04078
G2J5Z0	FI15274p1	CG8446-RE	58.75	80	2	9	2.22749	1.10061	0.908584	0.800682	1.9471
A1Z803	CG1665	CG1665-RA	20.29	340	6	8	0.930511	1.02683	0.97518	0.966781	1.00792
Q8IQ31	CG1695	CG1695	7.63	1192	8	11	0.863969	0.978181	0.943098	1.13533	0.886318
Q9VYW4	CG1703, isoform A	CG1703	8.32	901	6	6	0.868513	0.986595	1.01359	1.12646	0.866854
Q9VYF0	CG1764, isoform A	CG1764	15.3	268	3	5	1.1115	1.01422	0.985979	0.917557	1.11672
Q9W3B3	CG1885, isoform A	CG1885	7.58	277	2	3	1.01912	0.915178	1.10563	1.12195	0.86834
Q9V9U7	CG1890	CG1890	32.73	110	4	6	1.08814	0.927266	1.04335	0.961758	1.00514
Q7K1M4	CG1902, isoform A	CG1902	39.74	312	10	18	0.861481	0.976893	1.05537	1.02533	0.883538
Q9W2X6	ATP synthase, delta subunit, isoform A	ATPsyndelta	29.3	157	5	26	2.36778	0.973417	1.02731	0.711278	1.92179
Q7K4Y8	CG1909, isoform A	CG1909	3.8	606	2	2	0.641918	0.840328	0.57206	1.30601	0.789241
Q9VI56	CG1943, isoform A	CG1943	55.08	118	4	6	1.0655	1.00386	1.06313	0.865531	1.07295
Q9VAR0	CG1951	CG1951	4.19	835	3	4	0.866376	0.971109	0.799243	1.2399	0.901108
Q9VA97	CG1983, isoform A	CG1983	48.43	254	11	17	1.18447	0.987649	1.05926	0.992734	1.05854
Q9W3C3	CG2004, isoform A	CG2004	27.76	425	10	16	1.23902	0.931705	1.42134	0.901322	0.934584
Q9W087	CG2021	CG2021	42.11	95	3	4	1.25055	1.00853	1.39366	0.879096	0.993979
Q9VNI9	CG2023, isoform A	CG2023	33.92	227	7	8	0.75573	1.01264	0.917696	1.1851	0.840962
Q9VYT3	CG2025	CG2025-RA	15.69	1147	17	22	1.08132	0.924798	1.23567	0.872525	0.951578
Q0KIB3	CG2051, isoform A	Hat1	5.19	405	2	2	1.08428	0.908272	0.983915	0.982972	1.01305
Q9W3R8	CG2059, isoform A	CG2059	16.23	308	6	7	1.34649	0.872576	0.987134	0.700665	1.31477
Q7K0K1	CG2063	CG2063	10.15	325	3	3	1.00052	1.21763	0.857817	1.05999	1.15661
A1Z729	CG2064	CG2064	27.58	330	5	8	0.846898	0.862587	0.99429	1.07362	0.826674
Q9VNH5	CG2091	CG2091	20.32	374	8	12	1.04854	0.97108	0.99729	0.915981	1.05559
Q9VZW7	CG2107	CPT2	11.09	667	6	6	1.12441	0.902945	1.10749	0.877069	1.02156
Q9VZ60	CG2186, isoform A	CG2186	15.51	1128	15	19	1.07844	1.0757	0.946418	1.01914	1.09594
Q9VA71	CG2224, isoform A	CG2224-RA	6.67	420	2	2	0.936256	1.1016	1.25005	1.00628	0.903172
Q9W3L4	CG2233	CG2233	11.84	414	6	6	0.928674	0.6464	5.10136	3.94624	0.174087
Q9W3K9	CG2254	CG2254	12.81	320	3	4	0.871721	0.982309	1.10384	1.2887	0.774921
Q9W3K6	CG2258, isoform A	CG2258	10.36	801	7	11	0.840534	1.01623	0.840255	1.27403	0.878201
Q94511	NADH-ubiquinone oxidoreductase 75 kDa subunit, mitochondrial	ND-75	37.62	731	23	39	2.163	1.06918	0.9353	0.750539	1.91725
Q7K0X3	CG2469, isoform A	CG2469	3.3	1150	4	5	1.15869	0.959953	0.899285	1.13905	1.0394
Q9VIM0	CG2493, isoform A	CG2493	6.74	475	3	4	1.06427	0.772274	1.08795	0.95681	0.898171
Q9VIL2	CG2608	CG2608	9.41	255	2	3	0.998241	1.00946	1.00192	0.935883	1.03607
Q8SYJ2	GEO09626p1	ND-MLRQ	53.01	83	6	22	2.14458	1.09907	0.844563	0.856602	1.90672
Q9W4W5	CG2680	EG:100G10.4	19.02	305	5	8	1.05491	0.898404	1.15001	0.986319	0.914331
O76861	CG2685	EG:100G10.1	10.51	552	5	6	0.975685	1.0324	0.905171	1.04242	1.03106
Q9VHX4	CG2767	CG2767	44.07	329	14	25	1.20259	0.992051	1.04825	0.960042	1.09279
Q9VPR5	CG2807, isoform A	CG2807	19.03	1340	23	28	0.994317	1.11399	0.968945	1.12932	1.00478
Q0E9F9	CG2915, isoform A	CG2915-RB	15.01	453	7	9	1.1378	0.902936	1.1132	0.828923	1.05078
O46067	CG2918, isoform A	EG:25E8.1	34.34	923	28	50	1.07215	1.00434	1.1091	1.06659	0.954406
Q9W298	CG2921	CG2921	14.85	478	6	7	0.967254	0.986097	1.0141	0.939069	1.00009
Q9VND7	CG2931	CG2931	24.83	302	6	6	0.886696	0.988382	0.8166	0.993271	1.03603
Q9VF27	GM02062p	ND-23	28.57	217	7	11	2.1302	1.12317	0.890334	0.829967	1.89116
Q9VR44	CG3036, isoform A	CG3036	3.85	493	2	2	1.01893	0.949028	1.06397	1.32451	0.823942
Q9W3T9	CG3040	CG3040	26.05	238	6	8	0.927052	1.07336	0.936684	1.05087	1.00647
Q9VFP0	CG3061	CG3061	4.05	370	2	2	0.798529	1.23476	0.837635	1.6327	0.823083
Q9W503	CG3091, isoform A	CG3091	11.55	303	3	4	1.00757	0.835823	1.21747	0.628607	0.998548
Q9W1C8	CG3163	CG3163	19.57	368	8	11	0.904114	0.996417	0.901135	1.01486	0.991927
Q9W3W9	CG3168, isoform A	CG3168	3.64	632	2	2	0.908974	0.992017	1.15586	0.971851	0.893446
Q9W3X8	CG3198	CG3198	18.72	438	6	7	1.04507	0.956872	0.783992	1.06516	1.08263
Q9VHX2	CG3223	CG3223	16.87	415	6	9	0.965874	0.963805	1.04589	1.00276	0.941924
Q9W3Y3	CG3226	CG3226	36.09	230	8	11	0.815098	1.06301	0.954793	1.21474	0.865673
A1Z6N5	CG3270	CG3270-RA	30.68	440	11	22	1.12981	0.930636	1.07311	0.984849	1.00121
Q9W2N5	CG3295	CG3295	5.32	432	2	2	0.97434	0.999255	1.07892	0.962985	0.966545
Q9VDC0	CG3301, isoform A	CG3301	6.4	250	2	2	0.987492	0.846601	1.36754	1.03433	0.763611
Q9VDD0	CG3353	Smyd5	6.62	393	2	2	1.0582	0.859393	1.19763	0.758919	0.980087
Q9W196	CG3356	CG3356	2.5	1122	3	3	0.799222	1.10926	0.872127	1.44936	0.822093
Q7JUN9	CG3358, isoform E	CG3358	27.84	291	7	8	1.27971	0.966714	1.34573	0.783644	1.05497
Q9W0P4	CG3402	CG3402	12.2	123	2	2	1.09793	0.90944	1.09595	0.893699	1.0089
Q9VPL0	CG3436, isoform A	CG3436	24.5	347	8	10	1.07637	1.03911	0.981178	0.968806	1.08487
Q960Q8	CG3511, isoform A	CG3511	6.59	637	4	5	1.05177	0.988604	1.09155	0.793369	1.08247
Q9VQK5	CG3542	CG3542	12.41	806	10	10	0.946331	1.00462	0.855361	1.1698	0.963353
Q9W140	CG3548	CG3548	14.35	453	7	8	0.994448	1.01825	0.99754	1.05671	0.979775
O46079	CG3587	EG:39E1.2	6.02	299	2	4	1.15077	0.571358	2.92938	0.7072	0.473557
Q9W4U2	CG3603, isoform A	CG3603	34.94	249	8	11	1.40254	0.872345	1.3248	0.784257	1.07863
Q9VQK7	CG3605, isoform A	CG3605	23.23	749	15	18	1.01595	1.09388	0.882152	1.09523	1.06698
Q9VQB4	CG3609, isoform A	CG3609	49.25	335	16	32	1.12883	0.975485	1.12138	0.94375	1.01897
Q9W4K8	CG3626	CG3626-RA	8.63	939	7	8	1.4291	0.871017	1.11318	0.706747	1.26385
Q9VQX6	CG3702, isoform A	CG3702	7.33	641	6	14	0.701605	1.01011	0.715197	1.16637	0.909728
Q9W5C1	CG3703	EG:BACR7A4.15	3.38	711	2	2	0.659558	1.13049	1.029	1.12938	0.829351
Q9VQG4	Congested-like trachea protein	colt	6.86	306	2	2	1.66399	1.00084	0.999156	0.82566	1.46033
Q9W410	CG3815	CG3815	7.06	878	4	5	0.957648	0.948076	0.893265	1.0906	0.96061
Q9VDH5	CG3822	CG3822	4.34	853	4	5	1.01145	0.988681	0.80709	0.858491	1.20086
Q7K511	CG3835, isoform A	D2hgdh	24.2	533	10	15	1.08413	0.801879	1.17739	0.807673	0.950102
Q9W403	CG3847	CG3847	8.68	380	4	5	1.04339	0.890349	1.12595	0.958415	0.927734
Q9W112	CG3894	CG3894	7.14	322	2	2	0.872133	1.05201	1.23344	1.12782	0.814883
Q9VVU1	CG3902	CG3902-RA	38.89	414	12	29	1.43766	0.939976	1.44304	0.991703	0.976544
Q9XZ19	CG3909	CG3909	20.85	331	5	6	0.999999	1.03346	1	0.938605	1.04893
Q9U1K7	CG3939, isoform A	EG:140G11.5	34.07	135	5	5	1.11642	1.0421	1.00646	0.86209	1.15518
Q0E8X8	FI01416p	CG13551	42.99	107	5	11	2.52888	1.20027	1.07212	0.913925	1.87767
Q9VH09	CG3999, isoform A	CG3999	2.13	985	2	2	0.972852	0.660918	2.93679	1.68214	0.353712
Q9W4F8	CG4041	CG4041	10.13	819	8	9	0.831183	0.989476	1.00671	0.993333	0.910309
Q9W1A8	CG4049	CG4049	3.71	1669	4	4	0.812189	1.22276	1.21039	1.01379	0.914917
Q9VPC3	CG4074, isoform A	CG4074	9.83	295	2	2	0.787841	0.909786	1.3714	1.02156	0.709424
Q9VV83	CG4098	CG4098	7.17	307	2	2	0.997198	1.00281	1.05116	0.980556	0.984392
Q9VGA3	CG4115	CG4115	20.91	220	3	3	0.993427	0.979256	1.3276	0.859515	0.901956
Q9VPQ2	CG4164	shv	23.16	354	8	12	0.975342	0.964532	0.882185	1.25041	0.909631
Q9VPC2	CG4186, isoform A	CG4186-RA	22.35	85	2	3	1.17256	1.06776	0.942241	0.821527	1.27019
Q9VPU4	CG4291, isoform A	CG4291-RA	12.72	338	3	4	1.03217	0.968447	1.02522	1.09339	0.944305
Q6NP72	GEO09659p1	CG13220	28.1	153	3	5	2.12701	1.10023	0.830698	0.895466	1.8696
Q9VGV8	CG4511, isoform A	CG4511	8.8	216	2	2	1.08653	1.0013	0.918886	0.907664	1.14305
Q9VF23	CG4546	CG4546	6.56	457	3	3	0.949475	0.999274	1.00073	0.873025	1.04002
Q9VPW9	CG4552	CG4552	3.77	689	2	2	0.694156	0.766234	1.35138	0.701898	0.711247
Q9W3V2	CG4557	CG4557-RA	4.5	933	3	3	0.750316	0.98111	1.26099	0.768414	0.853168
Q9VVW3	Sideroflexin	CG6812-RA	12.23	327	4	7	1.87109	1.17379	0.785931	0.851944	1.85904
Q9VL66	CG4592, isoform A	CG4592-RA	13.59	287	3	4	1.4749	0.984073	1.28517	0.794493	1.18239
Q9W3T2	CG4593, isoform A	CG4593-RA	8.13	209	2	2	0.962348	1.05014	1.03156	1.13761	0.927771
Q9VL67	CG4594, isoform A	CG4594	16.07	280	3	3	1.22266	0.928628	1.14381	0.767014	1.12584
P24156	Protein l(2)37Cc	l(2)37Cc	47.1	276	11	20	1.71249	1.09281	0.821466	0.691964	1.8536
Q9W158	CG4612, isoform A	CG4612	13.03	307	4	6	0.940396	1.01966	0.981735	1.13792	0.924703
Q9W3S4	CG4617, isoform A	CG4617	7.42	418	3	4	0.864433	0.92568	0.940221	1.00883	0.918455
Q9VPE2	NADH dehydrogenase (Ubiquinone) 39 kDa subunit, isoform A	ND-39	32.21	416	11	15	2.04719	1.02727	0.973453	0.686771	1.85184
Q9VCU1	CG4721	CG4721-RA	8.31	686	5	5	1.07607	0.778342	1.26419	0.817772	0.890703
Q9W247	CG4752	CG4752-RA	2.7	1294	3	3	0.966712	0.791851	1.25661	0.950403	0.796808
Q9VV47	CG4842	CG4842	18.53	259	3	6	1.40997	0.866374	1.03258	0.984791	1.12837
Q9VAX8	CG4849	CG4849	17.64	975	15	19	1.08722	0.887134	1.05831	0.910478	1.00283
Q8SY58	CG4872	CG4872	8.73	355	3	3	1.26145	0.951501	1.06102	0.827554	1.17175
Q9VY41	Uncharacterized protein	CG13404	8.44	154	2	2	1.30215	0.966388	0.500524	0.7259	1.84972
Q9VPY4	CG4887, isoform A	CG4887-RA	1.89	1004	2	2	0.861721	1.02224	0.93227	1.00849	0.970735
Q9VV40	CG4925	Golgin104	5.03	776	3	3	1.01761	0.828784	1.38967	0.909352	0.80312
Q9VMB9	Cytochrome c oxidase subunit 5B, isoform A	COX5B	38.33	120	4	16	2.02897	1.07596	0.929402	0.74943	1.84946
Q9VDP8	CG4973 protein	mdlc	6.44	357	3	3	1.11378	1.03761	0.879035	1.13907	1.06604
Q9VAZ0	CG5003	CG5003-RA	4.49	713	2	2	1.14219	1.05187	0.950688	0.925659	1.16932
Q9VX77	CG5010, isoform A	CG5010	17.06	170	4	6	1.09263	1.0787	1.06631	0.926739	1.08945
Q961B9	CG5027	CG5027	8.6	430	4	4	0.8922	1.11905	0.915339	1.08095	1.00749
Q9VBQ5	CG5112	CG5112	5.74	523	2	3	0.910774	1.01467	1.08389	1.17572	0.852116
Q9VPY7	CG5126	CG5126	22.64	455	11	12	1.18605	0.984248	1.4021	0.866918	0.956495
Q9VX36	NADH dehydrogenase (Ubiquinone) 24 kDa subunit, isoform A	ND-24	39.67	242	8	18	1.99847	0.993592	1.00645	0.611481	1.84931
Q9VM22	CG5149	CG5149	27.23	448	12	17	0.852323	0.988582	0.747309	1.105	0.993844
Q9VKW1	CG5168, isoform A	CG5168	19.85	408	7	8	1.08954	0.760592	1.01654	0.822687	1.00593
B7Z0N0	CG5180, isoform B	CG5180	7.89	355	2	2	1.07965	0.946941	1.04238	0.931377	1.02677
Q9VF56	CG5205	obe	2.2	2183	5	5	0.884026	0.926495	1.06701	0.989311	0.880465
P35381	ATP synthase subunit alpha, mitochondrial	blw	60.87	552	34	264	2.22264	0.96577	1.03544	0.690175	1.84769
Q9VVM8	CG5290	CG5290-RA	4.26	798	3	3	0.926718	0.787612	1.07127	1.04535	0.809937
Q9VY24	CG5321, isoform B	CG5321	15.5	413	7	7	1.17265	0.813575	1.21356	1.00723	0.894377
Q7JVK8	CG5323	CG5323	36.3	146	5	6	1.24776	0.92374	0.878182	0.850088	1.25646
Q9VKV6	CG5337	TBC1D16	5.27	702	4	5	0.959077	0.93628	1.14563	1.04267	0.866132
Q9VKW5	CG5355	CG5355	48.54	756	37	81	1.18416	1.01346	1.03791	0.844069	1.16771
Q9VMH9	CG9150	CG9150	19.12	251	4	5	1.85281	1.02962	0.971231	0.589199	1.8472
Q9VL01	CG5390, isoform A	CG5390-RA	4.93	406	2	3	1.26757	0.872765	1.08422	0.922326	1.06668
Q9VF45	CG5404	CG5404	9.25	627	5	5	1.02053	0.936946	0.910628	1.19184	0.931039
Q9VUY4	CG5414	IleRS-m	8.61	941	7	9	1.65984	0.894358	1.01327	0.708444	1.48352
Q7K3D4	CG5482, isoform A	CG5482	16.62	397	6	6	0.968908	1.03017	0.898463	1.24079	0.934472
Q9VCC2	CG5510	CG5510	4.86	329	2	2	0.760829	1.00851	0.700213	1.33507	0.869332
Q9VCB9	CG5515, isoform A	CG5515-RA	29.1	244	8	10	1.0399	1.0798	1.02757	1.10594	0.993532
Q9VVL5	CG5567	CG5567-RA	26.36	330	7	10	1.0038	0.996211	1.08534	0.948386	0.983425
Q0E8E8	MIP08013p1	Mpcp	28.09	356	9	34	2.08587	1.06211	0.941523	0.769155	1.84019
Q9VL06	CG5604	CG5604	1.5	2727	3	3	0.772362	0.880158	1.19354	1.53078	0.60658
Q9VG59	CG5608	CG5608-RA	8.3	687	5	5	0.867897	1.02907	0.971755	1.21406	0.867852
Q9VEY5	MICOS complex subunit	CG5903	11.06	226	2	4	1.72005	1.07757	0.592794	0.928015	1.83956
Q9VSR8	CG5653	CG5653	8.19	476	3	3	1.27156	1.04667	0.982654	0.655973	1.41474
Q9VSR7	CG5660, isoform A	ValRS-m	4.53	994	4	4	1.23097	0.841624	0.899351	0.820632	1.20501
Q9VL16	CG5676	CG5676	22.44	156	4	5	1.11007	0.992822	1.10655	1.00723	0.994846
Q0E8P5	CG5758, isoform A	CG5758-RC	10.4	625	6	9	1.04639	0.92018	0.947083	0.955666	1.03354
Q9W4W8	CG2658, isoform A	CG2658	5.01	819	4	4	1.62815	1.07574	0.92745	0.929593	1.45602
Q9VDE2	CG5793, isoform B	CG5793	39.09	220	7	11	1.26505	0.806943	1.18647	0.89381	0.996015
Q9VMU2	CG5828, isoform A	CG5828	11.91	361	4	5	1.13371	0.991708	1.18655	0.972436	0.984449
Q9VG69	CG5844	CG5844	35.45	378	13	27	1.80184	0.866276	1.08424	0.759626	1.44702
Q9VCF8	CG5854	CG5854	11.59	371	4	4	0.890835	0.958712	1.09545	1.04307	0.864876
Q9VL69	CG5885, isoform A	BEST:CK01296	10	190	2	3	0.783384	1.15714	0.879757	1.50543	0.813573
Q9VBL3	CG5886	CG5886	3.88	515	2	3	1.11785	1.09457	1.01519	0.925145	1.14023
Q9VBK9	CG5913	CG5913	18.5	454	8	10	0.914699	0.943595	0.977059	1.0575	0.913366
O76742	CG5915 protein	Rab7	61.35	207	11	14	1.03005	0.990084	0.964886	0.947846	1.05615
Q9VEY4	CG5916, isoform A	CG5916	23.03	330	9	10	0.909489	1.02057	0.787704	1.23695	0.95328
Q9W444	CG5937, isoform C	CG5937	1.61	2051	3	3	0.931251	0.960432	0.955126	1.1162	0.913271
Q9VPE8	CG5955	CG5955	16.08	367	4	4	1.35958	0.869013	1.47973	0.885846	0.942095
Q9VCE2	CG5986, isoform A	CG5986	6.03	232	2	2	0.964573	0.966673	1.03448	1.11266	0.899452
Q9VE12	CG6005, isoform A	CG6005	10.49	324	3	3	0.737429	1.02455	0.875989	1.21532	0.842526
Q9VE08	CG6013	CG6013	21.6	213	4	4	1.13092	0.994009	1.01302	0.978104	1.0672
Q9VD52	CG6015	CG6015	4.34	576	2	2	0.63887	0.981731	0.963349	1.1659	0.761114
Q95SI7	CG6028	CG6028	72.01	293	15	28	1.16765	0.915989	1.02725	0.686665	1.21572
Q9VTL0	CG6083	CG6083-RA	19.57	322	6	8	1.0741	0.996874	1.16589	0.912839	0.996269
Q9VKU3	CG6094 protein	CG6094	10.34	203	2	2	1.21684	0.888851	1.01106	0.740634	1.20209
Q9VWW2	CG6123, isoform A	CG6123	25.57	614	11	18	0.793632	1.09966	0.67808	1.09831	1.06581
Q9VZ01	RH44935p	CG11752	19.27	109	2	3	2.31661	1.00251	0.9975	0.815356	1.83088
Q9VKU5	CG6144, isoform B	CG6144	17.98	228	6	9	1.00244	0.855712	1.05427	0.876868	0.962209
Q9VCC6	CG6178	CG6178	9.01	544	5	5	1.16749	0.909287	1.06785	1.04006	0.985228
Q9VK60	CG6180	CG6180	49.42	257	9	19	1.17194	0.867978	1.12407	0.840921	1.03813
Q9VKJ8	CG6201	CG6201	3.93	636	3	3	1.15263	0.976711	1.03332	0.871968	1.1176
Q9VF86	CG6218, isoform A	CG6218	29.02	348	9	12	1.03065	0.846155	1.16388	0.862025	0.926401
Q9VXW2	CG6227	CG6227	14.54	1224	17	20	0.939924	1.03165	0.906907	1.076	0.994285
Q9VTE8	CG6272, isoform A	CG6272	19.47	113	2	3	1.01716	1.0597	0.925327	1.27177	0.945276
Q9VKI8	CG6287	CG6287	42.47	332	12	21	1.18047	0.851934	1.28273	0.940052	0.91435
Q7K188	CG6329, isoform A	CG6329	13.55	155	2	8	1.02708	0.97363	0.580397	1.35045	1.03619
A8DRW0	Cuticular protein 49Aa	Cpr49Aa	34.72	144	3	3	3.42094	1.22859	1.57913	0.9684	1.82511
A0A0B4LGD3	Kazachoc, isoform G	kcc	22.93	1077	3	90	0.942809	1.06066	0.416208	1.18152	1.25395
A1Z9I0	CG6357	CG6357	14.35	439	4	4	1.23152	0.887606	1.36705	0.927229	0.923656
Q9VAY3	Mitoferrin	mfrn	5.54	379	2	2	1.24768	1.09513	0.913135	0.854183	1.32563
Q9VTC1	CG6418	CG6418	19.47	791	15	19	1.00139	1.0515	0.998615	1.07957	0.987828
Q0E938	CG6424, isoform A	CG6424	4.64	798	3	3	0.780355	0.898372	0.964621	0.941769	0.88058
Q9W4N6	CG6428	CG6428	16.32	631	8	9	1.0478	0.954377	1.17393	0.922116	0.955219
Q9VD58	CG6439, isoform A	CG6439	37.3	370	14	53	1.35852	0.996482	1.00353	0.780164	1.32029
Q94514	Cytochrome c oxidase subunit 5A, mitochondrial	COX5A	55.03	149	8	25	2.12519	1.02012	0.980281	0.75416	1.81344
Q9VJZ6	CG6523	CG6523	84.72	216	14	22	1.07094	0.948487	1.04115	0.98989	0.994282
Q9VWI0	NADH dehydrogenase (Ubiquinone) 18 kDa subunit	ND-18	34.43	183	4	4	2.14838	0.984788	1.01545	0.716823	1.80871
Q9W293	CG6613	CG6613	2.92	720	2	2	0.8269	0.995222	1.23071	1.0048	0.81508
Q9VWS1	CG6617	CG6617	43.11	225	7	8	0.999564	0.976351	1.00044	0.992841	0.99129
Q9VSL9	CG6638	CG6638	4.76	420	2	2	1.32455	0.946309	1.30525	0.99541	0.987048
Q9VFB9	CG6654	CG6654	3.76	639	2	2	0.887649	0.920079	0.984771	0.923168	0.947477
Q9VVC8	CG6664, isoform A	CG6664	12.59	532	7	11	0.995107	1.02655	0.895559	1.00492	1.06376
Q9VKP5	CG6700, isoform A	CG6700	4.58	874	4	4	0.791685	1.04558	1.05588	1.04939	0.872699
Q9VGP3	CG6723	CG6723-RA	10.9	587	7	11	1.06984	0.96232	0.786058	1.01238	1.12996
Q9VKD0	CG6734	CG6734	1.43	1953	3	4	0.773909	0.856438	1.19057	1.01863	0.737981
Q9VSK9	CG6745	CG6745	12.94	734	8	8	1.06859	0.93508	1.13148	0.947395	0.963828
Q9VKC7	CG6766	CG6766-RA	3.24	525	2	2	0.801169	1.21397	0.724262	1.29729	0.996829
Q9VAM6	CDGSH iron-sulfur domain-containing protein 2 homolog	Cisd2	23.31	133	3	14	1.30617	1.08305	0.760683	0.923321	1.41877
Q9VGJ7	CG6834	CG6834-RA	6.26	895	6	8	0.792229	0.935312	0.995117	1.25479	0.767826
Q9VVU6	CG6841, isoform A	CG6841	21.7	931	21	24	0.879874	1.06331	0.896344	1.05311	0.996785
Q9VVT6	CG6852, isoform A	CG6852	29.82	114	3	12	1.12413	1.0105	0.981433	0.992153	1.0816
Q8SXC2	CG6950, isoform A	CG6950-RC	24	450	10	11	1.05875	0.713722	0.974251	0.672736	1.07619
Q9VSK4	CG6983, isoform A	CG6983	41.67	180	7	10	0.995048	0.922732	1.11571	1.00498	0.904321
Q9W392	CG7033	CG7033	53.27	535	24	43	0.998477	1.06354	1.00153	1.03815	1.01095
Q8SXS0	CG7071, isoform A	CG7071	5.3	302	2	2	0.846134	1.02605	0.974612	1.32771	0.813173
Q9VD40	CG7084, isoform B	CG7084	2.68	597	2	2	1.22671	0.989808	0.998943	1.00106	1.10826
Q9VWY5	CG7135	CG7135	17.99	417	7	7	1.2955	0.915976	1.54725	0.874047	0.913346
Q9VLX2	CG7154	CG7154	2.44	861	2	2	0.836502	1.01994	1.04838	1.07595	0.873891
Q9VP08	CG7166, isoform B	CG7166	9.42	467	3	3	0.931521	0.750814	1.10778	0.739341	0.910787
Q9VEB2	CG7168	CG7168	17.17	233	4	4	0.886389	1.03055	1.048	1.0264	0.924093
Q9VEC8	CG7215, isoform A	Prx5-RA	23.85	130	4	4	0.972053	1.00957	0.927876	1.16001	0.949109
Q9VMM3	CG7239	CG7239	3.27	459	2	2	0.948564	0.980015	0.965948	1.14797	0.912325
Q9VFE9	CG7265	CG7265	13.22	469	6	6	0.943762	0.999165	1.17546	0.969147	0.905961
Q9VWP2	CG7322, isoform A	CG7322	15.7	242	3	4	0.981869	0.794894	1.2187	1.02686	0.791235
Q9VW68	CG7433, isoform A	Gabat	76.13	486	36	228	1.5319	0.87579	1.07468	0.756546	1.3148
Q9VVL8	CG7441, isoform A	TrpRS-m	4.36	665	3	4	1.34596	1.01591	0.919538	0.858623	1.32827
Q9VNX2	CG7442	SLC22A	7.75	568	3	4	1.17143	1.0576	0.757191	0.763691	1.46562
A1ZBJ2	CG7461, isoform B	CG7461	32.54	627	16	25	1.22996	0.981509	1.00571	0.994319	1.10572
Q9VNW6	CG7470, isoform A	CG7470	32.09	776	23	35	1.34241	1.17147	1.10411	0.865072	1.27661
Q9VVJ7	CG7484	CG7484	35.96	178	5	9	1.01831	1.08035	0.982022	1.06011	1.02768
Q9VG06	MIP04754p	CG17327-RA	20.86	139	2	2	1.23466	1.26731	0.588242	0.807503	1.79256
Q9VWL4	CG7556, isoform A	CG7556	5.56	522	2	2	0.944434	0.87261	1.14276	1.04712	0.829747
Q9VVI1	CG7564, isoform A	CG7564	13.57	420	5	6	1.07997	1.21177	0.871843	1.2381	1.08616
Q9VGF7	Glutamate carrier 1, isoform A	GC1	18.69	321	4	10	1.88883	1.02803	0.972732	0.656424	1.79041
E2QCZ5	CG7706	CG7706	4.41	726	3	3	1.04201	1.15976	0.94726	1.13886	1.05544
Q9VUQ7	CG7739	CG7739	4.19	596	2	2	0.892792	0.920481	0.995263	1.07899	0.874183
Q7K231	CG7747	CG7747	3.68	517	2	2	0.78615	1.00826	1.07807	1.20007	0.787667
Q9VLP2	CG7781, isoform A	CG7781	41.5	147	6	29	1.09368	1.01048	0.635969	1.0456	1.2513
Q9VAG9	CG7789	CG7789	39.54	306	10	14	1.09898	0.982604	1.12587	0.930136	1.01244
Q9W1F7	CG2970, isoform A	CG2970	26.5	366	8	12	1.95251	1.05422	0.883722	0.801277	1.78441
Q9VHV3	CG7800	CG7800-RA	4.88	533	2	2	1.05177	0.810885	0.769854	1.26387	0.915884
Q9VQM2	NADH dehydrogenase [ubiquinone] 1 subunit C2	ND-B14.5B	12.07	116	2	2	1.85549	1.02779	0.972963	0.644943	1.78211
Q9VUN9	CG7857	CG7857-RA	16.67	312	4	5	1.10565	0.97462	1.00388	0.996133	1.04013
Q9W0D6	CG7879, isoform A	CG7879-RB	6.29	985	5	5	0.85521	1.0326	0.918241	1.10973	0.930887
Q9VB69	Malic enzyme	Men-b	43.44	617	2	88	1.64584	1.1443	0.873899	0.694898	1.77852
Q9VAA9	CG7946, isoform A	CG7946	21.68	475	8	9	1.00069	0.942693	0.999315	0.990526	0.97665
Q9VFZ4	CG7966	CG7966	7	486	4	4	1.01292	0.883107	1.16307	0.893035	0.922146
Q9W0B3	CG7967	Vta1	15.19	316	5	8	1.0473	0.911544	1.51944	0.954833	0.791688
Q9W0A9	CG7974, isoform A	CG7974	12.24	294	3	3	1.03164	1.04145	0.989837	0.939265	1.07464
Q7K127	CG7997, isoform A	CG7997	19.9	417	7	14	1.15846	0.860889	1.29966	1.08539	0.846669
Q9VTB0	CG8003, isoform A	CG8003	16.71	407	6	6	0.839973	1.15997	1.02501	0.975596	0.999665
Q9VG04	CG8031	CG8031	20.68	295	5	10	1.17862	0.934938	1.08856	0.902571	1.06149
Q9VHN8	CG8032, isoform A	CG8032	14.41	583	7	10	1.01912	1.01027	1.00009	0.999909	1.0147
Q9VHN4	CG8043	CG8043	24.43	348	8	8	1.33881	0.993968	0.865498	0.757209	1.43758
Q95RB2	Cuticular protein 49Ae	Cpr49Ae	25.37	134	4	7	2.35216	1.27124	1.14215	0.916462	1.76012
Q9VT61	CG8108, isoform A	CG8108	11.43	919	11	16	1.06002	1.03178	0.884634	0.969198	1.12836
Q9VXR9	CG8128, isoform A	CG8128	15.45	330	6	6	1.32521	0.855103	1.14205	0.811376	1.11615
Q9VHE4	CG8132	CG8132	29.68	283	7	11	1.27471	0.961586	1.02058	0.931232	1.14575
Q9VHC8	CG8149	CG8149	31.82	308	9	13	1.00996	1.06888	0.87485	1.03012	1.09128
Q5BI03	CG8155	CG8155	3.01	1098	3	3	0.92852	1.01098	0.979121	0.989141	0.985386
Q7K1W5	CG8187	CG8187	36.17	376	12	17	1.67901	0.958646	1.01685	0.846217	1.41577
Q8SXU3	CG8207	CG8207	12.56	438	6	8	1.10313	0.996524	1.12355	0.984426	0.996051
Q9VSC5	CG8209	CG8209	41.99	331	12	20	1.06217	1.07586	0.944244	0.996514	1.10165
A1Z7K8	CG8235	AIMP1	23.53	323	7	9	0.995741	0.83365	1.06882	0.969724	0.897401
A1Z7K6	CG8243	CG8243-RA	5.8	517	3	4	0.971959	1.03797	0.87677	1.13774	0.997726
A1Z6G9	CG8245	CG8245-RA	10.79	343	3	4	0.780065	0.859504	1.02003	0.980362	0.819623
Q7K3J0	CG8258	CG8258	56.41	546	28	52	1.02747	1.03516	1.01715	1.00273	1.02116
Q9VRX1	CG8270	CG8270	7.63	642	5	5	1.03575	0.965481	1.33567	0.964182	0.870159
Q7JY99	CG8298, isoform A	CG8298	3.36	596	2	2	1.377	0.872231	0.994082	0.594488	1.41588
A1ZA77	CG8320	CG8320-RA	10.92	174	2	2	0.827983	1.21459	0.813171	1.50941	0.879439
Q9VT21	CG8336, isoform A	CG8336	8.88	383	2	3	0.937717	1.04692	0.992726	1.00733	0.992293
Q9VLR3	CG8360, isoform A	CG8360	10.13	158	2	2	0.937886	1.0256	1.08362	1.00949	0.938073
A1ZA83	CG8397	CG8397	6.12	245	2	2	0.863009	1.12563	0.845869	1.30645	0.923952
Q7JVH0	CG8435	CG8435	6.01	333	2	3	0.875994	1.01031	1.04774	0.989795	0.92578
Q7K1V1	CG8441, isoform A	CG8441	10.67	253	2	2	1.19488	1.06396	0.828708	1.03236	1.21374
Q9VLS0	CG8460	CG8460	13.68	402	5	8	1.04633	0.891755	1.01102	0.975632	0.975552
Q0E981	CG8485, isoform A	CG8485	2.21	860	2	4	1.00144	0.991194	0.998561	0.902449	1.0482
Q9VLS4	CG8498, isoform A	CG8498	66.67	90	4	15	1.23228	1.02673	1.00632	0.934484	1.16395
Q9VH66	CG8500, isoform A	CG8500-RA	45.92	233	7	10	1.08079	0.92525	1.223	0.747934	1.01781
Q9VH64	CG8507	CG8507	20.32	379	9	16	1.01593	1.04205	0.923247	1.07266	1.0311
Q7K4T8	CG8520, isoform A	CG8520	9.83	458	4	4	0.970861	1.03001	0.951004	1.06087	0.994535
Q9VRY5	CG8549, isoform A	CG8549	6.75	252	2	2	0.85699	0.941187	0.998382	1.07568	0.866985
Q9VXN3	CG8578, isoform A	CG8578	23.23	396	9	10	0.973458	1.01537	0.896072	1.03646	1.02913
Q9VS47	CG8602, isoform A	CG8602	8.79	478	3	3	0.899471	1.11176	0.816707	1.32925	0.937221
Q9VV75	AT02348p	UQCR-C2	66.36	440	20	45	2.12015	0.993164	1.00688	0.763936	1.75812
Q5BIA9	CG8613	CG8613	24.13	808	18	30	1.20873	0.990629	1.06421	0.881791	1.13019
Q9VS10	CG8641, isoform A	CG8641-RA	9.45	434	4	5	0.767793	0.918345	0.821932	1.25464	0.811983
Q8SZ72	CG8646	CG8646	6.76	562	4	5	1.53911	0.949829	0.993474	0.903384	1.31214
Q9VID9	CG8677, isoform B	CG8677	4.81	2663	11	11	0.999791	0.975835	0.918055	1.04311	1.00737
Q7K3W2	CG8728	CG8728-RA	23.92	556	11	13	1.43753	0.968396	1.00401	0.797134	1.33577
Q7K2N0	CG8735, isoform A	CG8735	9.56	387	3	4	0.793021	1.04019	0.854544	1.14286	0.917797
Q9VU92	CG8757	CG8757	13.1	252	2	2	1.2134	0.698143	1.0501	0.638177	1.13225
Q7JWF1	Electron transfer flavoprotein-ubiquinone oxidoreductase, mitochondrial	Etf-QO	12.75	604	8	9	1.523	0.989636	1.01047	0.800393	1.38753
Q9VFF0	GH01077p	UQCR-C1	42.55	470	16	39	2.15869	0.915845	1.01108	0.739116	1.75668
Q7K2E1	CG8839, isoform A	CG8839	19.85	529	8	10	0.849078	0.927875	1.13099	1.36455	0.712052
Q0E9B5	CG8841, isoform A	CG8841	5.62	837	4	4	0.683587	0.697106	0.965951	1.23639	0.626921
Q9W199	GEO07594p1	mRpS17	9.03	155	2	2	1.80484	1.14976	0.869745	0.840638	1.72745
Q9VHF9	CG8861, isoform B	CG8861	10.11	178	2	7	1.17641	0.964451	0.519528	1.03686	1.37553
Q9VEX6	AAA family protein Bor	bor	17.38	604	9	11	1.63723	1.03757	0.935552	0.866047	1.48468
Q9VMI5	CG9135 protein	CG9135	4.31	487	2	2	1.04431	0.879099	1.11861	1.07141	0.878264
Q9W0H6	CG9149	CG9149	30.1	392	10	15	1.13151	1.02714	1.01542	0.979034	1.08233
Q8T0N5	CG8768	CG8768	11.26	302	5	8	1.50782	1.03574	0.797271	0.965493	1.44294
Q9W0K9	CG9205, isoform A	CG9205	16.52	224	3	4	0.819299	1.12346	0.821722	1.16131	0.979688
Q9VIF2	CG9248, isoform A	CG9248	11.34	494	6	10	1.08259	0.863543	0.938824	0.84241	1.09258
Q9VIG0	CG9257	CG9257	27.09	347	8	9	0.759758	1.2018	0.71697	1.13183	1.06099
Q9VIH1	CG9273 protein	RPA2	17.07	246	5	7	1.14804	1.00934	1.02812	0.961367	1.08439
Q9VXR5	CG9281, isoform B	CG9281	12.44	611	7	9	0.96767	0.912339	1.39148	1.03341	0.775296
Q9VJZ1	CG9302	CG9302-RA	17.45	510	8	9	1.02808	0.894894	1.27869	1.00237	0.843018
Q9VIH9	CG9338, isoform A	CG9338	16.33	147	2	3	0.996634	0.933188	1.04371	0.988807	0.949473
Q9W2P5	CG9344	CG9344	22.78	79	2	3	1.30527	1.01822	1.12521	0.893901	1.15075
Q9W2N6	CG9346	CG9346	4.91	957	4	4	0.894711	1.05456	0.795587	1.00305	1.08375
Q9VYU9	CG9360	CG9360	27.49	251	6	9	1.02654	0.913636	1.11576	0.947749	0.940233
Q7KTW5	CG9391, isoform A	CG9391	50.72	278	14	34	1.05652	0.996324	1.13421	1.00369	0.960216
Q9W2L6	CG9394, isoform A	CG9394	42.86	679	26	120	1.00912	0.960048	1.09128	0.990959	0.945697
Q9VUH9	CG9425, isoform B	CG9425	0.81	2103	2	2	0.831986	1.06976	0.9222	1.09479	0.942861
Q7JVH6	CG9436	CG9436	21.86	311	5	7	0.957199	0.881353	1.20149	0.904037	0.873202
Q9VH72	CG9471, isoform A	CG9471-RA	37.25	204	6	14	0.94273	0.893111	1.17011	0.792342	0.935482
Q9VME3	CG9507	CG9507	11.4	684	9	9	0.992948	0.819184	1.01248	1.0071	0.897279
Q9VY05	CG9512, isoform A	CG9512	5.46	623	4	4	1.55232	0.860665	1.9208	0.928531	0.84686
Q86BM0	CG9515, isoform A	CG9515	18.66	209	4	6	1.21939	1.04357	1.18421	0.838169	1.11896
Q9VQ29	Cytochrome b-c1 complex subunit Rieske, mitochondrial	RFeSP	23.48	230	4	8	1.79537	1.04964	0.952705	0.701351	1.72002
Q9VMC6	CG9547	CG9547	16.71	419	6	6	1.3275	0.832152	1.30426	1.02742	0.926221
Q9VZU4	LD25561p	ND-30	34.34	265	7	15	2.1206	0.977149	1.01522	0.804456	1.70236
Q9W5W6	CG9578	CG9578	13.97	272	3	4	1.03105	1.06319	0.983564	1.08829	1.01081
Q9W2D6	Mitochondrial import inner membrane translocase subunit Tim10	Tim10	16.3	92	2	2	1.90483	1.05419	0.948596	0.793819	1.69823
Q9VF39	CG9590	CG9590	15	460	7	8	0.914827	1.07977	0.867584	1.37344	0.890038
Q8SXQ1	CG9629	CG9629	41.11	540	20	34	1.27212	0.968629	1.1164	0.893474	1.11487
Q9W3R0	CG9657, isoform A	CG9657-RA	6.66	601	4	5	1.22935	1.0289	0.762815	0.802442	1.44274
Q9VHR5	CG9684	CG9684	7.63	642	4	4	0.872014	0.876279	1.09451	1.06916	0.808023
Q9W309	CG9686	CG9686	37.65	162	6	9	0.906354	1.09225	0.986623	1.06695	0.973234
Q9W306	CG9691, isoform A	CG9691	14.05	121	2	2	0.943796	0.915847	0.978598	0.999579	0.94008
Q9W2I2	CG9752	CG9752	16.62	343	6	10	1.03392	1.01982	1.04601	0.883342	1.06448
Q9W1V8	CG9893 protein	DCTN3-p24	46.88	192	8	8	1.05137	0.982613	0.895721	1.01435	1.06487
Q9W1W4	CG9896	CG9896	9.49	253	3	4	1.20463	1.12417	0.773496	0.889549	1.40032
Q9VXI1	CG9914, isoform A	CG9914	15.56	315	5	6	1.00551	0.961278	1.16565	0.99452	0.910479
A8JV07	CG9915, isoform B	CG9915	2.68	820	2	2	1.06653	0.870121	1.031	0.909704	0.99791
Q9VXH7	CG9917, isoform A	CG9917-RA	10.63	301	3	4	1.08226	1.07186	0.876633	1.01518	1.13865
Q9VFN9	CG9922, isoform A	CG9922	41.94	124	5	9	0.975381	0.962622	1.1718	0.94975	0.913487
Q9VK44	CG9934, isoform A	CG9934	11.67	1217	14	15	0.899689	1.04873	0.905807	1.04857	0.996953
Q9VS02	CG9953	CG9953	8.86	508	5	6	1.20285	0.870315	1.30185	0.917246	0.934236
Q9VAU6	CG9986	CG9986	6.73	535	3	3	0.937589	1.10751	0.926219	1.10846	1.00512
Q95SH2	Charged multivesicular body protein 1, isoform A	Chmp1	19.21	203	5	8	1.14029	1.07944	0.903704	1.01203	1.15868
Q9VRJ5	Charged multivesicular body protein 2b	CHMP2B	30.19	212	6	6	1.04608	1.0351	0.931055	0.96609	1.09701
Q9VVI9	Charged multivesicular body protein 5	Vps60	36.73	226	7	13	1.03862	1.02077	1.03257	1.07599	0.976682
Q9XYW6	CHIP ortholog	STUB1	29.07	289	8	10	0.995846	1.07743	0.877021	1.00417	1.10211
Q23997	Chitinase-like protein CG5210	CG5210	24.56	452	9	12	0.860377	1.02998	0.980096	1.2386	0.852012
Q9W303	Chitinase-like protein Idgf4	Idgf4	26.92	442	9	17	0.957976	1.11586	1.04387	1.28093	0.892049
Q9VGH7	Chloride channel protein 2	ClC-a	3.02	1193	3	3	0.915951	0.99841	0.810945	1.24388	0.931643
Q9VY78	Chloride intracellular channel, isoform A	Clic	8.85	260	2	2	1.17295	0.886783	1.10104	0.594438	1.21484
P07668	Choline O-acetyltransferase	Cha	45.63	721	32	85	0.965208	1.05774	1	1.0426	0.990379
Q9VU35	RH34413p	CG11267	64.08	103	6	32	1.71569	1.09284	0.915045	0.742092	1.69481
Q9W4K0	CHOp24, isoform A	CHOp24	15.38	208	3	3	0.908158	1.11704	0.997846	1.19111	0.925189
Q9V444	Chromatin accessibility complex 14kD protein	Chrac-14	35.94	128	3	3	0.94921	0.926775	0.950045	1.14254	0.896494
Q24368	Chromatin-remodeling complex ATPase chain Iswi	Iswi	30.96	1027	31	38	0.898125	1.0213	0.922091	1.03626	0.980121
Q86BS3	Chromator, isoform A	Chro	32.4	926	24	37	0.992155	1.05156	0.876045	1.00791	1.0848
P22058	Chromosomal protein D1	D1	29.86	355	10	31	1.17804	0.98449	0.78772	1.01575	1.19909
O97428	Ciboulot, isoform A	cib	68.99	129	3	27	1.33088	1.07029	1.00247	0.935472	1.23903
Q9VM65	Circulating cathodic antigen homolog	CG10158	14.6	315	4	4	1.09005	1.00319	0.96607	1.01178	1.05834
Q9VAG5	Claret, isoform A	ca	2.35	1961	5	5	0.978872	0.947373	0.980959	1.09199	0.929231
P29742	Clathrin heavy chain	Chc	45.17	1678	69	150	0.989766	0.990654	0.966177	1.00943	1.00243
Q9VWA1	Clathrin light chain	Clc	29.22	219	7	24	1.04255	1.02648	0.887867	0.974201	1.11115
Q9VE51	Cleavage and polyadenylation specificity factor 73	Cpsf73	5.26	684	3	4	0.824571	1.03211	0.990349	0.997444	0.934041
Q9V726	Cleavage and polyadenylation specificity factor subunit 1	Cpsf160	3.44	1455	4	5	1.02363	0.976916	0.856323	0.951928	1.10634
Q9VE52	Cleavage stimulation factor 64 kilodalton subunit	CstF-64	25.54	419	10	13	1.04877	1.02499	0.939457	0.99843	1.07011
Q9NBD7	CLIP-associating protein	chb	11.2	1491	17	23	0.825947	1.03042	0.766107	1.27458	0.909678
Q9VMQ9	Clot protein	cl	54.76	126	8	18	1.22525	1.07599	0.922117	0.967703	1.21771
Q9W0B8	Coatomer subunit alpha	alphaCOP	21.72	1234	25	29	0.844842	0.958555	1.08654	1.09843	0.825363
P45437	Coatomer subunit beta	betaCOP	22.61	964	16	18	0.906726	0.986854	1.11834	1.01332	0.888311
O62621	Coatomer subunit beta'	beta'COP	15.65	914	14	20	0.982826	0.988347	1.00481	1.08687	0.942386
P45594	Cofilin/actin-depolymerizing factor homolog	tsr	44.59	148	7	58	1.10059	0.924848	1.05621	0.931915	1.01877
Q9VVB4	Coiled-coil domain-containing protein 22 homolog	CG9951	27.39	555	14	15	0.955839	1.03068	0.970235	1.10955	0.955153
Q9VVA0	Cold shock domain-containing protein CG9705	CG9705	22.38	143	3	8	1.17222	1.01416	0.971359	0.98604	1.11698
P08120	Collagen alpha-1(IV) chain	Cg25C	2.19	1779	3	4	0.7716	1.00582	0.697744	0.994218	1.05051
E1JJ33	Complexin, isoform U	cpx	62.24	143	2	47	1.10366	1.25687	0.733151	1.0487	1.32476
Q9W2E8	NADH dehydrogenase (Ubiquinone) B12 subunit, isoform A	ND-B12	11.82	110	2	2	1.96316	0.898692	0.945817	0.750413	1.68718
Q7KNQ9	Connector enhancer of KSR protein CNK	cnk	3.15	1557	3	3	0.818462	1.04241	0.79514	1.00461	1.03396
Q961G1	Conserved oligomeric Golgi complex subunit 3	Cog3	4.2	905	3	3	0.824872	1.06605	1.00757	1.08818	0.902269
Q9VJD3	Conserved oligomeric Golgi complex subunit 5	fws	4.93	751	3	4	0.88079	0.959004	1.04275	1.046	0.880809
Q9VAD6	Conserved oligomeric Golgi complex subunit 7	Cog7	5.39	742	4	4	0.781884	0.968468	0.973225	1.206	0.803199
Q9VN14	Contactin	Cont	3.53	1390	5	6	1.00455	0.910445	0.932176	0.995467	0.993441
Q9VVU5	COP9 signalosome complex subunit 1b	CSN1b	8.95	525	4	5	0.793512	1.03823	1.01007	1.0972	0.869247
Q94899	COP9 signalosome complex subunit 2	alien	16.44	444	6	8	0.7311	1.03373	0.984485	1.20336	0.806653
Q8SYG2	COP9 signalosome complex subunit 3	CSN3	21.35	445	9	10	0.912789	0.933001	1.01496	1.11574	0.866283
Q9V345	COP9 signalosome complex subunit 4	CSN4	47.42	407	16	21	0.85472	0.958354	1.02658	1.14168	0.836187
Q9VCY3	COP9 signalosome complex subunit 6	CSN6	13.2	341	4	6	0.885442	1.05589	0.940526	1.18147	0.914864
Q9V4S8	COP9 signalosome complex subunit 7	CSN7	14.75	278	4	7	0.845197	0.963358	1.01157	1.16248	0.83188
Q7KTH8	COP9 signalosome complex subunit 8	CSN8	16.48	182	4	6	0.832199	1.01011	0.991224	1.01604	0.917819
Q9VF71	Copper homeostasis protein cutC homolog	CG6136	60.84	263	13	19	1.14929	0.961843	1.09098	0.87344	1.07469
Q9VDF4	Cortactin, isoform A	Cortactin	23.43	559	13	21	1.12638	1.10151	0.924803	0.984821	1.16666
A1ZBK7	Crammer	cer	34.18	79	2	4	1.02829	0.883676	1.00951	0.990577	0.955938
Q9W2F4	Cricklet	clt	9.25	562	5	5	1.23378	1.0246	0.975987	0.886318	1.21268
Q9VKE2	Crystallin, isoform A	Crys	13.63	477	6	6	1.23599	1.18932	1.53121	1.62393	0.768683
Q9V9V0	CstF-50	CstF-50	4.01	424	2	2	0.921672	1.05567	0.965906	1.11212	0.95155
Q9VAP3	CTL-like protein 2	CG11880	3.39	796	3	3	0.994344	1.00569	0.755256	1.01578	1.1293
Q9VUL1	CTP synthase	CTPsyn	11.16	627	7	8	1.08549	0.921242	1.12161	0.854244	1.01563
Q8SZK9	C-type lectin 27kD, isoform A	Clect27	14.72	231	3	3	1.44441	0.876229	1.03687	0.808486	1.25755
Q9V9R2	Cullin 2, isoform A	Cul2	29.61	753	20	23	0.98037	0.916499	1.12047	1.02002	0.886181
Q5BI50	Cullin 4, isoform A	Cul4	8.4	821	7	7	0.821956	0.945022	1.03244	1.07156	0.839819
Q9VAQ0	Cullin 5	Cul5	8.57	852	9	9	0.780528	0.975232	1.0254	1.07313	0.836663
Q24311	Cullin homolog 1	Cul1	7.49	774	6	6	0.888632	0.761143	1.0828	1.05428	0.771976
Q9VKY2	Cullin-associated NEDD8-dissociated protein 1	Cand1	18.43	1248	24	31	0.749765	1.01088	0.918844	1.13684	0.856476
A1Z7X7	Glutathione S transferase T2	GstT2	10.09	228	2	2	1.13251	1.23763	0.664161	0.740723	1.68707
Q7JXC4	CG6459 protein	P32	29.28	263	5	16	1.80992	0.994687	1.00534	0.658045	1.68608
Q9VZG1	Cuticular protein 64Ab	Cpr64Ab	25.83	120	2	2	0.987186	0.657956	1.17812	0.535812	0.959865
Q9VZF9	Cuticular protein 64Ad	Cpr64Ad	27.94	247	5	9	0.870279	0.997652	0.963222	0.834889	1.03883
Q9VSN3	Cuticular protein 66D	Cpr66D	8.52	270	2	2	2.02878	1.00043	0.999573	1.01946	1.50033
Q9VV46	Cuticular protein 72Ec	Cpr72Ec	5.59	429	3	3	1.37254	1.07191	1.10781	1.07052	1.12217
Q7K569	Glycerol-3-phosphate dehydrogenase	Gpo-1	25.97	724	17	25	1.83139	1.07246	0.864502	0.862924	1.68103
P48609	Cyclin-dependent kinase 5 homolog	Cdk5	13.95	294	5	5	0.694665	0.9912	1.02792	1.03329	0.817902
Q9VN13	Sideroflexin	CG11739	13.71	321	5	6	1.26917	0.874431	1.03086	0.909595	1.10469
Q9VRD9	Cystathionine beta-synthase	Cbs	26.44	522	11	14	1.10107	0.864507	1.14267	0.925077	0.950587
Q9VCC0	Cysteine and histidine-rich domain-containing protein	CHORD	11.3	354	4	5	0.921284	1.0333	1.00075	1.01548	0.969426
Q9VZV5	Cysteine and histidine-rich protein 1 homolog	CG32486	8.25	412	3	4	1.01367	0.986516	1.09971	1.15072	0.888799
Q7KN90	Cysteine--tRNA ligase, cytoplasmic	Aats-cys	28.88	741	23	31	1.11368	0.937947	1.11373	0.921533	1.00804
Q9V4N3	Cytochrome b5	Cyt-b5	31.34	134	3	7	0.699556	0.995625	0.839379	1.43431	0.745563
P19967	Cytochrome b5-related protein	Cyt-b5-r	8.94	436	3	3	0.934675	0.976868	1.75059	1.86065	0.529332
Q9VAJ9	CG1907	CG1907	16.09	317	4	5	1.05166	0.959463	1.04225	0.694573	1.15793
Q9VSW4	CG4447	CG4447-RA	21.26	254	5	5	1.89981	1.1133	0.898187	0.898227	1.6773
Q9W5N0	Cytochrome c oxidase assembly factor 7 homolog	CG13865	22.93	266	7	10	1.37355	1.02258	0.96461	0.800996	1.35711
Q9V420	FI02878p	Su(P)	9.59	417	4	5	1.64082	1.07367	0.905489	0.713322	1.67684
Q9VZF6	GH04863p	CG14997	14.88	457	5	6	1.34986	0.988684	1.01145	0.826944	1.27206
Q9VMD3	CG9531, isoform A	CG9531	31.89	323	9	15	1.66111	1.1417	0.875887	0.797514	1.67492
P04657	Cytochrome c-1	Cyt-c-d	18.1	105	2	2	1.17697	0.986141	1.02239	0.775843	1.20291
Q9VMI3	GM14163p	ND-51	31.22	474	9	14	1.86646	0.960413	1.04122	0.650098	1.6714
P84029	Cytochrome c-2	Cyt-c-p	67.59	108	8	167	1.28798	1.03453	0.966625	0.900212	1.24409
Q9VYY4	Cytochrome P450 4g15	Cyp4g15	7.67	574	5	7	0.737847	0.996087	0.859157	1.22511	0.831915
Q9VF87	Cytoplasmic FMR1-interacting protein	Sra-1	14.33	1291	18	28	0.994223	1.07497	0.819604	1.0063	1.13324
Q9U9P7	Cytoplasmic phosphatidylinositol transfer protein 1	rdgBbeta	21.98	273	6	10	0.978641	0.950982	1.13724	0.839864	0.975982
Q9VJI9	Cytosolic Fe-S cluster assembly factor NUBP1 homolog	CG17904	27.01	311	7	8	0.898914	0.963737	1.07835	1.03763	0.880281
Q9VPD2	Cytosolic Fe-S cluster assembly factor NUBP2 homolog	CG4858	11.92	260	2	2	1.04575	0.910837	1.06181	0.932225	0.981223
Q9VRV4	D19B	D19B	3.88	774	2	2	0.939878	1.12838	1.01599	0.979373	1.03653
Q9VD64	Dead end	dnd	26.26	179	3	7	1.06216	1.0115	1.39259	1.06445	0.843965
O61305	DEAD-box helicase Dbp80	Dbp80	19.35	460	3	12	0.658358	1.04807	0.84712	1.0233	0.912323
Q24307	Death-associated inhibitor of apoptosis 2	Diap2	8.84	498	3	3	0.996901	1.05966	1.00311	0.811299	1.13346
Q24298	DE-cadherin	shg	7.03	1507	8	8	0.904497	0.945299	0.801567	1.15488	0.945485
Q9W1H5	Decapping protein 1, isoform A	DCP1	15.59	372	5	7	0.860328	0.986507	1.03959	1.08833	0.867904
Q9VVH3	MICOS complex subunit MIC13 homolog QIL1	QIL1	32.79	122	3	5	1.68655	1.05079	0.87772	0.777875	1.65338
Q9VTV9	Delta-aminolevulinic acid dehydratase	Pbgs	13.76	327	5	7	1.47506	1.00485	1.3968	0.829102	1.11412
Q9VX98	Density-regulated protein homolog	DENR	46.56	189	7	8	1.11164	1.0623	1.02816	0.959831	1.09353
Q9V9U4	Deoxyhypusine hydroxylase	nero	39.4	302	9	10	1.14727	0.995829	1.05375	0.980671	1.05342
Q9VI57	Dephospho-CoA kinase	Dpck	8.9	236	2	3	1.00734	1.42221	0.759681	1.43241	1.10833
Q7K4Y0	Desaturase 1, isoform A	Desat1	4.96	383	2	2	0.744971	0.938473	1.10782	1.46896	0.653314
Q7K3M5	DHX15 ortholog, isoform A	Dhx15	19.48	729	14	19	0.996654	0.966984	1.12805	1.00336	0.921286
Q4V6M1	Diadenosine tetraphosphate hydrolase	Apf	34.51	142	5	6	1.1361	1.09374	0.977555	0.938394	1.16383
Q9VTT9	Differentially expressed in FDCP 8 homolog	CG11534	5.49	492	3	4	1.15701	0.789567	1.46456	0.634919	0.927172
Q9VXY3	Dihydrolipoamide acetyltransferase component of pyruvate dehydrogenase complex	CG5599	6.06	462	3	3	1.02251	0.93379	1.04859	0.99437	0.957584
Q9W3W4	5-demethoxyubiquinone hydroxylase, mitochondrial	COQ7	12.33	219	2	2	1.27296	0.964162	0.788353	0.564885	1.65316
Q9VSR5	GM03767p	mRpL12	35.16	182	5	8	1.81844	1.0231	0.977423	0.745834	1.64893
Q9VSU6	Dihydropteridine reductase	Dhpr	55.32	235	10	30	1.1268	0.90433	1.06588	0.855841	1.05693
Q9VMY9	Dihydropterin deaminase	DhpD	10.04	448	3	3	1.23961	0.889033	1.23714	0.791626	1.04923
Q9W374	Dihydropyrimidine dehydrogenase	su(r)	13.39	1031	11	12	1.005	0.838121	1.20505	0.84369	0.899635
Q9VSD6	D-Importin 7/RanBP7	msk	8.2	1049	8	10	0.776127	0.999262	0.917934	1.12498	0.869047
Q9VFQ9	Dipeptidase B, isoform A	Dip-B	48.03	508	23	34	1.38508	0.944716	1.13304	0.863508	1.16691
Q9VG79	Dipeptidase C, isoform A	Dip-C	8.96	491	5	6	1.29938	0.930204	1.19715	0.677932	1.18906
Q9VHR8	Dipeptidyl peptidase 3	DppIII	44.02	786	30	59	1.28331	0.990573	1.04066	0.913673	1.16351
Q9VXQ3	Diphosphomevalonate decarboxylase	CG8239	17.53	388	6	8	1.03634	0.97974	1.10762	1.03419	0.941298
Q9VC93	Dis3, isoform A	Dis3	8.15	982	7	7	0.982242	0.92759	0.972225	1.05527	0.941967
E1JJH5	Discs large 1, isoform M	dlg1	21.94	1030	3	32	0.858088	0.882017	0.961297	1.14549	0.825951
O76324	Discs overgrown protein kinase	dco	7.95	440	3	3	0.961518	0.957132	1.01638	0.983882	0.959199
Q9VH98	Diuretic hormone 44, isoform A	Dh44	26.4	356	8	15	0.814086	1.01014	0.797263	1.18758	0.919082
Q24114	Division abnormally delayed protein	dally	13.42	626	8	9	1.03436	1.01082	0.71189	0.989296	1.20221
Q9VA37	Dj-1beta	dj-1beta	37.97	187	7	16	1.05226	0.996267	1.00375	0.840465	1.11079
Q9XYZ5	DNA damage-binding protein 1	pic	13.25	1140	16	20	1.11944	0.961652	1.16901	0.867746	1.02176
Q7K3D8	DNA methyltransferase 1 associated protein 1	DMAP1	5.31	433	2	2	0.819699	0.934547	0.883503	1.17845	0.850768
Q9V3W9	DNA repair protein Rad23	Rad23	47.34	414	5	26	1.06466	0.983049	1.30429	0.854748	0.948434
Q94883	DNA replication-related element factor, isoform A	Dref	21.16	709	15	22	0.815607	1.01798	0.864759	1.06216	0.951565
P15348	DNA topoisomerase 2	Top2	32.07	1447	47	70	0.905208	1.09121	0.988279	1.09368	0.958911
O96651	DNA topoisomerase 3-beta	Top3beta	2.86	875	3	3	0.941572	1.02008	0.913873	1.04907	0.999341
Q24312	DNA-binding protein Ewg	ewg	3.82	733	2	4	0.981963	1.03932	0.963771	1.01636	1.02078
P13468	DNA-binding protein K10	fs(1)K10	3.02	463	2	2	0.998858	0.922206	1.1425	1.02593	0.885925
P13469	DNA-binding protein modulo	mod	25.46	542	11	19	1.14216	0.94421	1.11721	1.03505	0.969383
P91875	DNA-directed RNA polymerase I subunit RPA1	RpI1	0.97	1642	2	2	0.890076	0.843462	0.974225	1.00364	0.876468
Q9VEA5	DNA-directed RNA polymerase II 16 kDa polypeptide	Rpb4	24.46	139	3	3	1.16595	0.956828	0.999908	1.02311	1.04931
P04052	DNA-directed RNA polymerase II subunit RPB1	RpII215	9.01	1887	16	17	1.01721	0.880317	1.10275	0.944377	0.926921
P08266	DNA-directed RNA polymerase II subunit RPB2	RpII140	8.59	1176	7	7	0.949122	0.969292	1.11844	1.03829	0.889501
P36958	DNA-directed RNA polymerase II subunit RPB9	RpII15	11.63	129	2	2	1.3977	0.88799	1.22862	1.00286	1.02429
Q24133	DnaJ protein homolog 1	DnaJ-1	32.63	334	10	12	0.889957	1.11419	0.94908	1.04986	1.0026
Q9VFV9	DnaJ-like-2, isoform A	Droj2	34.74	403	14	30	0.968185	1.11042	0.988563	1.15037	0.971798
Q7KN75	Dodeca-satellite-binding protein 1, isoform A	Dp1	26.29	1301	33	46	0.938312	0.957714	1.11504	1.15197	0.836358
Q24319	Dolichyl-diphosphooligosaccharide--protein glycosyltransferase 48 kDa subunit	Ost48	21.6	449	8	15	0.850338	1.01101	0.943826	1.12219	0.900937
Q76NQ0	Dolichyl-diphosphooligosaccharide--protein glycosyltransferase subunit 1	CG33303	16.38	458	8	11	0.871182	1.19888	0.750419	1.4113	0.957599
Q9VLM5	Dolichyl-diphosphooligosaccharide--protein glycosyltransferase subunit DAD1	l(2)k12914	17.86	112	2	3	0.909563	1.21814	0.78394	1.37669	0.984761
Q9VLQ1	Dolichyl-phosphate beta-glucosyltransferase	wol	5.21	326	2	2	0.668565	1.0006	0.889678	1.25739	0.777416
Q94521	Dopamine N-acetyltransferase	Dat	25.45	275	8	13	0.992948	1.00147	1.08632	0.948342	0.980221
Q7JZD5	Dorsal interacting protein 3	Dlip3	17.24	348	5	6	1.01741	0.98289	0.97906	1.18481	0.924408
E1JHK2	Dorsal-related immunity factor, isoform C	Dif	7.29	987	3	10	0.887339	0.891588	0.952453	1.16859	0.838704
P24785	Dosage compensation regulator	mle	11.6	1293	13	13	0.965775	0.995609	1.00859	1.01447	0.969514
A8JNC7	Dpr-interacting protein delta, isoform D	DIP-delta	6.82	469	2	4	0.911254	1.05859	0.907748	1.30642	0.889654
O18335	Drab11	Rab11	52.34	214	12	28	0.955444	1.00096	1.03854	0.980229	0.969109
Q9V3I2	Drab5	Rab5	45.21	219	7	20	0.894626	1.18567	0.912522	1.07668	1.04579
Q9VU84	Drebrin-like protein	Abp1	30.7	531	14	20	0.99571	1.04344	0.969403	1.09956	0.985593
P61849	Dromyosuppressin	Dms	29	100	3	6	0.97682	1.02373	0.852648	1.19573	0.976649
Q9VUQ9	Drop out, isoform A	dop	2.66	2139	5	6	0.8544	1.01426	1.17603	1.14378	0.805527
Q8STG9	DSec61alpha	Sec61alpha	10.71	476	5	7	0.837401	1.04604	1.02014	1.10348	0.886899
Q9V3C8	DShc protein	Shc	20.78	409	6	6	0.875509	0.951659	1.04327	1.0249	0.883471
Q7KNA0	Dymeclin	CG8230	2.29	699	2	2	0.794918	1.01166	0.98847	1.06056	0.881676
Q7K130	Dynactin 4, p62 subunit	DCTN4-p62	13.23	514	6	8	0.976618	0.935729	1.04718	1.00856	0.930246
Q9VJQ6	Dynactin 5, p25 subunit	DCTN5-p25	14.81	189	3	3	1.23494	0.781373	1.45138	0.809758	0.891725
P13496	Dynactin subunit 1	Gl	19.6	1265	24	29	0.745908	1.04144	0.910164	1.1892	0.851372
Q7K2D2	Dynactin subunit 2	DCTN2-p50	57.89	380	21	35	1.067	1.09939	0.967722	1.00164	1.10005
Q9VQE0	Dynamin related protein 1, isoform A	Drp1	44.63	735	28	48	0.746515	1.05584	1.00532	0.994709	0.901163
Q9VZ20	Dynein light intermediate chain, isoform A	Dlic	27.59	493	4	18	0.924729	1.15799	0.850772	1.16103	1.03525
Q9VDW3	Dystrophin, isoform B	Dys	5.63	1669	3	11	0.80691	1.03227	0.800138	0.968741	1.03974
Q9VRP9	E3 ubiquitin-protein ligase Bre1	Bre1	13.03	1044	14	14	0.942018	1.01139	0.993027	1.07051	0.94663
Q9NB71	E3 ubiquitin-protein ligase highwire	hiw	3.1	5233	15	15	0.787687	1.05977	1.02023	1.21611	0.826108
Q9VB08	E3 ubiquitin-protein ligase RING1	Sce	6.9	435	2	4	0.956575	1.0454	0.951918	1.04923	1.00041
Q9VE61	E3 ubiquitin-protein ligase RNF181 homolog	CG7694	17.01	147	3	3	1.22492	0.85365	1.58634	0.956319	0.817481
Q9VX91	E3 ubiquitin-protein ligase UBR1	Ubr1	5.26	1824	8	11	1.0763	0.843237	1.08877	0.86749	0.98123
Q9VI55	E3 UFM1-protein ligase 1 homolog	CG1104	4.99	782	4	4	0.822358	0.910074	0.911048	1.32505	0.774757
A1Z6P3	Eb1, isoform F	Eb1	34.68	297	2	16	1.0056	1.17041	0.922885	1.2603	0.996718
Q9VDC6	Ebony	e	48.58	879	33	62	1.10193	0.981627	1.26262	1.01872	0.913306
Q7KUB3	Ecdysone-inducible gene E1, isoform A	ImpE1	1.73	1616	2	3	1.22535	0.936476	1.06783	0.884809	1.10713
Q9VYY9	Ecotropic viral integration site 5 ortholog	Evi5	14	807	9	10	0.737814	1.01415	0.986048	1.14831	0.82084
Q9VJ26	EF-hand domain-containing protein D2 homolog	Swip-1	37.33	217	7	9	1.07544	1.01558	0.97401	1.14827	0.985271
O76863	EG:100G10.3 protein	eIF2B-beta	6.25	352	2	3	1.00231	0.997697	1.19459	1.14474	0.854946
O77430	EG:115C2.4 protein	SkpA	43.83	162	8	11	1.08495	1.00867	0.890641	1.02567	1.09253
Q9W5E2	EG:115C2.8 protein	EG:115C2.8	10.54	408	3	3	1.00229	1.03791	0.752026	0.99771	1.16601
O96824	EG:131F2.3 protein	EG:131F2.3	61	100	5	6	1.02442	0.914584	0.976162	1.13196	0.91978
O18399	EG:152A3.5 protein (Fbgn0003116;pn protein)	pn	27.65	405	9	10	0.987336	0.962908	1.16916	0.961368	0.915379
Q94522	Succinate--CoA ligase [ADP/GDP-forming] subunit alpha, mitochondrial	Scsalpha	47.26	328	12	88	1.89973	1.00035	0.999654	0.759689	1.64839
Q7K738	EG:52C10.4 protein	Ubc10	33.77	154	6	11	1.19372	1.04427	1.00767	0.966822	1.13345
O46094	EG:86E4.5 protein	Ocrl	23.76	850	17	17	0.928111	0.976135	1.02445	1.12248	0.886962
Q9W4Y1	EG:BACR25B3.5 protein	EG:BACR25B3.5	50.88	228	12	20	1.11101	0.973185	1.10839	0.861868	1.05783
Q9VAD4	EIF2B-alpha protein	eIF2B-alpha	8.82	306	3	3	0.991676	0.972537	1.1769	1.01182	0.897423
Q9W541	EIF2B-epsilon protein	eIF2B-epsilon	7.47	669	6	8	0.974088	0.976051	1.04549	1.07594	0.919258
A1ZA22	eIF2B-gamma	eIF2B-gamma	18.46	455	7	9	1.06962	0.746431	1.26454	0.860096	0.854757
Q7JXZ2	Eip55E, isoform A	Eip55E	27.74	393	10	20	1.07859	1.13577	1.04622	1.00095	1.08167
Q9W1C9	Ejaculatory bulb-specific protein 3	EbpIII	27.78	126	5	6	1.50071	0.804345	0.981273	0.931843	1.20487
Q9VW12	UPF0389 protein CG9231	CG9231	32.8	125	3	4	1.44646	0.957813	0.795642	0.872296	1.44147
P08736	Elongation factor 1-alpha 1	Ef1alpha48D	41.04	463	5	97	1.01302	1.01922	1.07142	1.0014	0.980424
P05303	Elongation factor 1-alpha 2	Ef1alpha100E	35.71	462	3	98	1.08	1.00214	1.28529	0.878987	0.962049
Q9NJH0	Elongation factor 1-gamma	Ef1gamma	46.64	431	21	41	1.1161	1.13789	1.06047	1.0078	1.0898
P13060	Elongation factor 2	EF2	42.65	844	35	90	1.19978	0.98627	1.25379	0.996763	0.971342
Q9U616	Glycine cleavage system H protein, mitochondrial	ppl	18.18	165	2	5	1.4793	0.845379	1.18221	0.861069	1.13772
Q9VJC7	Elongation factor Ts, mitochondrial	CG6412	23.9	318	7	7	1.23111	0.937646	0.926382	0.913151	1.17897
A1Z9E3	Elongation factor Tu	EfTuM	41.92	489	16	28	1.54517	0.952118	1.01702	0.734065	1.42614
O44226	Elongin B	EloB	83.9	118	7	19	1.0476	0.943044	1.12774	0.872692	0.995105
Q7JWD6	Elongin C, isoform A	EloC	29.06	117	2	5	1.04413	0.884293	1.01778	1.02901	0.942169
Q9XYZ4	Endo/exonuclease Mre11	mre11	4.84	620	2	2	1.01766	1.008	0.992068	0.822262	1.11647
Q9V3V9	Endonuclease G inhibitor, isoform A	EndoGI	45.13	359	13	14	1.08468	0.939752	1.03712	0.917213	1.03587
Q8T390	Endophilin-A	EndoA	55.01	369	19	80	0.881694	1.14933	0.870063	1.14388	1.00848
Q9VUB8	Endosulfine, isoform A	endos	40.34	119	5	7	1.10666	1.03814	0.972181	0.991559	1.0922
Q9VVI2	Enhancer of mRNA-decapping protein 3	Edc3	10.29	680	6	7	0.933999	1.01676	1.07047	0.959872	0.960804
Q9VKK1	Enhancer of mRNA-decapping protein 4 homolog	Ge-1	8.42	1354	12	16	0.656665	1.02759	0.87789	1.19284	0.813364
Q9VYX1	Enhancer of yellow 2 transcription factor	e(y)2	25.74	101	2	3	0.974219	1.02301	1.08083	0.943888	0.986424
Q5U117	Enigma	Egm	18	639	10	11	1.40346	0.932022	1.07294	0.750063	1.28112
Q9VN95	Enolase-phosphatase E1	CG12173	30.47	256	8	11	1.0189	0.981447	1.07593	0.867966	1.02904
Q9VHY6	ER membrane protein complex 1, isoform A	EMC1	14.75	915	2	17	0.725343	1.20197	0.791525	1.36068	0.895505
Q9VKR0	ER membrane protein complex 3	EMC3	12.96	247	2	2	0.980436	0.928516	1.01995	1.23402	0.846926
Q9VNQ3	ER membrane protein complex subunit 4	CG11137	20.48	166	2	2	0.413469	1.17265	1.81017	1.24477	0.5192
Q9W1Y1	ER membrane protein complex subunit 8/9 homolog	EMC8-9	10.84	203	2	4	0.965422	1.04327	0.996722	1.0946	0.96049
Q9V3A8	Ergic53, isoform A	ergic53	25.78	512	9	10	0.766543	1.04293	0.939884	1.06367	0.903132
Q9V3A6	Ero1-like protein	Ero1L	3.73	483	2	3	0.97367	1.01916	1.06616	0.914555	1.00612
Q9VRN3	Esa1-associated factor 6	Eaf6	8.89	225	2	3	1.0405	0.912482	0.934727	0.987548	1.01597
Q9VDL1	Esterase CG5412	CG5412	15.77	279	4	5	0.880935	0.981484	1.00732	1.07468	0.894535
Q9VNF9	Ethanol sensitive with low memory, isoform A	elm	26.98	189	4	6	0.848636	0.926739	1.00198	0.998023	0.887686
P54352	Ethanolamine kinase	eas	4.05	518	2	2	0.858774	0.990788	1.07146	1.0093	0.88889
Q9VEJ0	Peroxiredoxin 3	Prx3	31.2	234	8	21	1.70523	1.04861	0.953646	0.724962	1.64055
Q02748	Eukaryotic initiation factor 4A	eIF-4a	44.42	403	19	51	1.02687	0.973832	1.24827	0.902345	0.930292
Q9VHS8	Eukaryotic initiation factor 4A-III	eIF4AIII	30.58	399	10	15	1.14601	1.05641	1.13975	0.837431	1.11392
Q7PLL3	Eukaryotic initiation factor 4B	eIF-4B	22.88	459	3	13	0.877427	1.11776	0.971167	1.22784	0.907312
P41374	Eukaryotic translation initiation factor 2 subunit 1	eIF-2alpha	42.82	341	14	25	1.00084	1.01286	0.966826	1.12342	0.963377
P41375	Eukaryotic translation initiation factor 2 subunit 2	eIF-2beta	21.15	312	8	11	0.940077	1.01504	1.00759	1.00205	0.972869
Q24208	Eukaryotic translation initiation factor 2 subunit 3	eIF-2gamma	37.05	475	12	23	1.0592	0.866295	1.20671	0.944106	0.895241
Q9VN25	Eukaryotic translation initiation factor 3 subunit A	eIF3-S10	23.86	1140	29	40	0.819791	0.991626	1.03479	1.14524	0.830911
Q0E940	Eukaryotic translation initiation factor 3 subunit B	eIF3-S9	13.48	690	11	13	0.96023	1.07447	1.01745	1.21909	0.909756
A1ZAX1	Eukaryotic translation initiation factor 3 subunit C	eIF3-S8	23.74	910	20	27	0.856275	1.09001	0.973341	1.08544	0.945359
Q9VCK0	Eukaryotic translation initiation factor 3 subunit D-1	eIF-3p66	13.93	560	7	11	0.935259	0.991259	1.03961	1.00882	0.940487
O77410	Eukaryotic translation initiation factor 3 subunit E	eIF3-S6	16.78	435	6	9	0.810909	1.07608	0.979969	1.14283	0.888915
Q9VN50	Eukaryotic translation initiation factor 3 subunit F-1	eIF3-S5-1	21.07	280	5	7	0.899103	0.979406	1.25431	1.02602	0.82379
Q9W4X7	Eukaryotic translation initiation factor 3 subunit G-A	eIF3ga	22.68	269	5	9	0.97291	1.02484	1.01958	1.08872	0.94756
Q9U9Q4	Eukaryotic translation initiation factor 3 subunit H	eIF-3p40	17.16	338	5	7	0.810608	1.02722	1.02377	1.17336	0.83647
O02195	Eukaryotic translation initiation factor 3 subunit I	Trip1	30.37	326	8	13	0.945257	1.05596	1.10389	1.06901	0.920989
Q7K550	Eukaryotic translation initiation factor 3 subunit J	Adam	17.37	236	4	5	1.00379	0.927172	0.949694	1.07132	0.955442
Q9W2D9	Eukaryotic translation initiation factor 3 subunit K	CG10306	21.62	222	4	6	1.00313	0.963042	1.45962	0.996876	0.800399
Q9VTU4	Eukaryotic translation initiation factor 3 subunit L	CG5642	20.41	539	8	11	0.972739	1.00157	1.00057	1.04613	0.964632
Q7JVI3	Eukaryotic translation initiation factor 3 subunit M	Tango7	32.56	387	12	18	0.863831	1.12568	0.972262	1.13138	0.945747
P48598	Eukaryotic translation initiation factor 4E	eIF-4E	29.73	259	6	7	0.857949	1.06928	0.937668	1.04114	0.973938
Q9VCH1	Eukaryotic translation initiation factor 4G2, isoform A	eIF4G2	3.57	2072	6	6	0.695338	0.854209	1.0704	1.20282	0.681652
Q9VXK6	Eukaryotic translation initiation factor 5	eIF5	31.03	464	14	18	0.914447	1.02786	1.03817	1.03415	0.937257
Q9GU68	Eukaryotic translation initiation factor 5A	eIF-5A	35.85	159	6	27	1.25538	0.973169	1.02757	0.879835	1.16836
Q9VVG4	Exocyst complex component 1	Sec3	11.02	889	9	9	0.738583	0.973459	0.850277	1.14961	0.85607
Q9VQQ9	Exocyst complex component 2	Sec5	15.55	894	12	13	0.816069	0.952556	0.999907	1.11061	0.838006
Q9V8K2	Exocyst complex component 3	Sec6	7.45	738	5	7	0.889783	0.960133	0.880063	1.14907	0.911676
Q9VNH6	Exocyst complex component 4	Sec8	8.12	985	7	7	0.813396	0.966	0.91856	1.0352	0.910756
Q9XTM1	Exocyst complex component 5	Sec10	8.17	710	6	6	0.700768	0.974912	0.899389	1.02573	0.870427
Q9VDE6	Exocyst complex component 6	Sec15	7.83	766	6	7	0.8639	1.04972	0.837578	1.16488	0.955637
Q9VSJ8	Exocyst complex component 7	Exo70	11.98	693	7	8	0.821214	1.00598	0.958632	1.11173	0.882544
Q9TVM2	Exportin-1	emb	22.86	1063	21	28	0.835719	0.90427	1.05356	1.02782	0.835978
Q9XZU1	Exportin-2	Cas	5.03	975	5	6	0.812146	1.04381	0.958032	1.19371	0.862535
A1Z8N1	Facilitated trehalose transporter Tret1-1	Tret1-1	4.67	857	3	3	0.85855	0.992177	1.00788	1.35294	0.783932
Q8IRG6	FACT complex subunit spt16	dre4	8.77	1083	9	10	1.04784	0.865585	0.91505	0.91332	1.04652
Q05344	FACT complex subunit Ssrp1	Ssrp	9.68	723	7	7	1.28196	0.797862	0.91285	0.971773	1.10358
Q9W2N0	F-actin-capping protein subunit alpha	cpa	20.63	286	6	9	1.16628	1.05257	0.918946	1.00983	1.15039
P48603	F-actin-capping protein subunit beta	cpb	18.12	276	5	12	1.0342	1.08831	0.915191	0.99997	1.10827
Q9VMD5	Farjavit, isoform A	frj	7.57	489	4	6	0.865991	1.1456	0.855298	1.35566	0.909829
Q9VR31	Farnesyl transferase alpha, isoform A	Fnta	29.61	331	8	11	1.0281	0.852849	1.02105	0.906566	0.975792
Q9VJ58	Fas-associated factor, isoform A	Faf2	10.34	464	4	4	0.982233	0.805306	0.92296	1.13715	0.86769
P06002	Opsin Rh1	ninaE	10.72	373	4	9	1.56186	1.10808	0.620379	1.01098	1.63663
Q494G8	F-box and leucine-rich repeat protein 6, isoform A	Fbl6	23.47	720	12	16	0.987427	1.10443	0.925852	1.07449	1.04575
Q95RJ9	F-box-like/WD repeat-containing protein ebi	ebi	8.71	700	5	7	1.05791	0.971805	1.0499	0.922128	1.02925
Q7JPS2	Igloo, isoform A	igl	43.33	240	2	57	0.933106	1.07169	0.558655	1.11319	1.19915
Q9VB17	CG5611, isoform A	CG5611	8.59	326	3	3	1.62796	1.00913	0.990957	0.782111	1.4873
Q9VW53	FI01414p	Mtr3	4.91	326	2	2	0.915688	1.06703	0.910955	1.07631	0.997708
P08985	Histone H2A.v	His2Av	31.21	141	6	9	1.24734	0.992508	0.712449	0.946127	1.35047
A1Z6V5	FI01422p	Spn43Ab	8.14	393	2	3	0.953754	0.942988	0.881205	1.48749	0.800753
A1ZB68	FI01423p	GstE3	32.73	220	8	11	1.26669	0.992366	1.53248	1.00022	0.89196
O18332	FI01544p	Rab1	36.59	205	5	21	0.892413	1.03208	0.830153	1.13951	0.977066
Q9W2I4	FI01566p	Sgf29	15.22	289	3	5	0.818229	1.07798	0.871398	1.02018	1.00245
Q9W0A8	FI01658p	RpL23A	35.74	277	13	23	1.02995	0.994816	1.00521	1.03408	0.992876
Q9VH82	FI02086p	CG12948	9.92	252	2	2	0.936602	1.01359	0.862054	1.00881	1.0424
Q7PLV6	FI02158p	CG40470-RA	12.54	941	10	13	0.994448	0.816898	1.11499	0.890703	0.903102
Q9W499	FI02809p	RpL35	23.58	123	3	7	1.05926	1.00051	1.27075	0.99949	0.90729
Q7KB18	FI02870p	Jheh2	12.96	463	3	5	1.23472	1.04892	0.921147	1.28736	1.03402
P51905	Sodium-dependent serotonin transporter	SerT	3.7	622	2	4	0.945163	1.05802	0.530163	1.1171	1.21607
A1Z7X8	FI02944p	CG12926	25.88	313	8	10	0.962973	0.932617	1.16416	1.03845	0.860609
Q7JZN0	FI02994p	Sec61beta	47	100	4	5	0.745222	1.12123	0.853153	1.48753	0.797397
Q9VS84	FI03225p	ltl	1.96	817	2	2	1.18153	0.865794	1.40084	1.0163	0.846998
Q9VTN9	FI03238p	CG10361-RA	41.01	417	12	16	1.26651	0.864317	1.23856	0.951363	0.973013
Q9VKC8	FI03495p	Tom70	15.79	589	10	12	1.00701	1.04923	0.893773	0.993034	1.0898
Q8INU6	FI03731p	CG31674-RA	11.01	327	2	3	0.968003	0.882097	1.35598	0.769415	0.870474
Q9Y095	FI04011p	XRCC1	4.89	614	3	3	1.07694	0.979911	0.991175	1.0089	1.02839
Q9VDE9	FI04035p	RhoGAP93B	9.32	1330	10	11	0.858002	0.980781	0.876953	1.13471	0.91406
Q9VU43	FI04407p	SRm160	6.71	954	5	8	1.06508	1.00226	0.891539	0.997743	1.09425
Q9VQR9	FI04424p	CG17593-RA	9.45	476	5	6	0.795301	1.15392	0.825151	1.38452	0.88213
Q9VGE4	FI04457p	GCC185	2.64	1135	3	3	0.794025	0.942073	1.05898	1.01531	0.836961
Q9W0M7	FI04459p	CG13900-RA	16.14	1227	11	18	1.01451	0.975762	1.1078	0.985693	0.950697
Q7KUC2	FI04467p	Pdxk	27.3	304	9	16	1.19316	0.967254	1.16105	0.948303	1.0242
Q9VTL8	FI04525p	CG32085-RA	5.56	666	3	3	1.05029	0.952121	1.09479	0.886553	1.01063
Q9VPG2	FI04531p	CG13248-RA	5.08	669	3	3	0.82965	0.919542	1.02204	1.1623	0.800786
Q9W074	FI04779p	HBS1	9.85	670	6	6	0.992606	0.873111	1.13256	0.969707	0.887479
Q95WY3	FI04781p	Nop56	12.7	496	6	6	0.963503	1.08765	0.860127	1.03214	1.08397
O76877	CG3719	EG:132E8.3	15.63	160	2	2	1.89933	0.783361	0.978511	0.676678	1.62078
Q7K9H6	FI05490p	Sara	7.07	1343	6	6	0.732601	0.987374	0.913716	1.08944	0.858632
Q0KI98	FI06027p	TrpRS	23.95	430	10	11	1.005	1.05251	1.16962	0.928859	0.980475
Q8IRN0	FI06485p	CG10962-RB	10.04	249	2	2	1.04074	0.748318	1.41512	1.07253	0.719176
Q9VAI3	FI06539p	CG18731-RA	15.97	119	2	2	1.0753	1.00391	0.830633	0.996101	1.13821
Q9VGZ2	FI06805p	Rrp46	10.73	233	2	2	0.971999	1.01989	1.01369	0.986491	0.995853
Q9W396	FI06908p	HP1b	11.67	240	3	4	0.911923	1.05858	0.88599	1.09317	0.995627
Q9W1F2	FI07217p	CG16787-RA	5.14	253	2	2	1.15721	0.871896	1.02116	0.750219	1.14549
Q9VK19	FI07225p	Ski6	12.6	246	2	2	0.997395	0.888855	1.13674	0.894773	0.928493
Q9VKW8	FI07244p	LSm-4-RB	30.52	154	5	9	1.09391	1.05808	0.91234	0.955915	1.15187
Q9W3Q0	FI07418p	Rab39	16.06	218	3	4	0.80511	1.04434	0.641374	1.03751	1.10159
Q9VHT2	FI07663p	tex	14.06	320	4	4	1.06161	0.937898	1.01054	1.04715	0.971722
Q9VN44	FI07923p	Karybeta3	17.29	1105	16	19	0.842299	0.978366	0.988862	1.01126	0.910275
Q9W0Q3	FI08521p	CG17180-RA	7.28	302	2	2	0.934614	0.977354	1.05229	1.10339	0.886944
Q8IMX8	FI09213p	LSm3	19.42	103	2	4	1.09593	0.956173	1.04664	0.988223	1.00847
Q7KND8	FI09619p	Mad1	18.22	730	13	13	0.810431	1.0952	0.944092	1.11217	0.926744
Q8MLQ0	FI14118p	HSPC300	23.68	76	2	2	0.996884	1.06043	1.10559	0.972757	0.989881
Q9VQ58	FI15207p1	CG15356-RA	8.21	1023	7	8	0.981827	0.903485	0.873631	1.01851	0.996392
Q9V9E3	Presequence protease, mitochondrial	CG3107	24.76	1034	24	39	1.8177	0.938957	1.06501	0.64021	1.6166
Q9VF77	FI16517p1	Trax	20.13	298	5	8	1.10512	0.935573	1.12231	0.877246	1.02057
Q9VH25	FI16817p1	gammaSnap2	12.72	283	2	5	0.969515	0.731275	0.759645	0.864907	1.04693
Q8IPA2	FI17312p1	Mal-B2	6.91	564	3	3	1.01421	0.793592	1.19972	0.995585	0.823487
Q9W5Y0	FI17316p1	Nep3	10.81	786	8	9	1.16837	0.966289	1.03489	1.17916	0.964146
Q9VPB7	FI17508p1	CG11399-RB	2.93	920	3	4	0.979605	1.01644	0.956724	0.959876	1.04145
Q9VY15	FI17948p1	CG14411-RA	7.83	843	6	6	0.843563	1.04598	0.99826	1.06403	0.916237
Q9VQQ6	FI18122p1	Snx1	40.83	458	2	25	0.801565	1.13335	0.787687	1.33984	0.909467
Q9VWX8	FI18190p1	Frq2	54.01	187	4	14	0.939209	0.91267	1.09156	0.893859	0.932737
Q9VW22	FI18195p1	l(3)76BDm	5.38	1319	6	6	0.985711	0.981632	1.00494	1.02001	0.97155
A1Z9G2	FI18620p1	fand	5.21	883	5	5	1.02349	0.935529	1.06892	1.09018	0.907331
Q9VB46	FI18644p1	Hmu	12.44	579	6	7	0.912049	0.992343	0.904837	1.28225	0.870743
Q9U6P7	FI18813p1	Syt4	18.78	474	9	12	0.762156	1.05817	0.834266	1.25713	0.870386
Q8IM93	FI18814p1	CG32017-RB	28.42	482	14	24	0.743266	0.961408	0.799115	1.14533	0.87669
Q9V9X7	FI18849p1	PNPase	7.78	771	5	6	1.04757	0.954595	0.875786	0.664991	1.29945
Q9VBX6	FI20018p1	CG13650-RB	5.32	752	3	3	0.919709	1.07363	0.828815	1.1043	1.03115
Q9VDD8	FI20021p1	Usp8	8.15	896	7	7	0.982462	0.995383	1.00464	1.05898	0.958434
Q0KI00	FI20034p1	SP1029	5.36	932	5	5	1.05767	0.825239	1.32152	0.912458	0.842849
Q9W2V2	FI20035p1	CG32683-RA	12.56	804	7	9	0.853849	0.993529	1.07613	1.00651	0.887034
Q9VJ68	FI20105p1	CG31751-RA	14.15	417	6	8	0.996718	0.977058	1.04422	0.999005	0.966012
Q9VEN3	FI20177p1	GckIII	19	642	11	15	0.974241	1.17315	0.875395	1.35228	0.963961
P02283	Histone H2B	His2B	44.72	123	6	18	1.21954	0.833081	0.731646	0.778378	1.35933
Q9VYE3	FI21110p1	CG15747-RA	8.53	387	3	4	1.18479	1.01205	0.887851	0.972414	1.18093
Q8IRD0	RH17559p	CG32267	28.57	49	2	2	1.10094	1.07649	0.635956	0.928942	1.39142
M9PCU0	FI21215p1	ninaC	43.08	1135	3	102	1.07977	1.03555	0.905751	1.04023	1.08703
Q9VHW4	FI21225p1	unc-45	2.01	947	2	2	0.79894	0.929148	0.914393	1.26564	0.792688
Q9VHC7	FI21236p1	rump	16.77	632	9	13	1.09647	0.999793	0.918016	1.00021	1.09281
Q9W3N0	FI21262p1	snz	3.94	1117	6	6	0.615933	0.996752	0.788791	1.35106	0.753644
A1Z6L9	FI21274p1	Trap1	26.63	691	16	24	1.14494	1.00338	0.895464	0.906477	1.19222
Q9VR38	FI21343p1	Mon1	4.92	528	2	2	0.945958	0.910017	1.00064	1.11435	0.877532
A1Z6R7	FI21445p1	CG30158-RA	60.36	280	15	25	0.933247	1.01425	0.959861	1.02806	0.979662
Q9VRV8	FI21453p1	Trn	3.25	893	3	4	0.712467	0.999016	0.965485	1.20039	0.790205
Q94523	Succinate dehydrogenase [ubiquinone] flavoprotein subunit, mitochondrial	SdhA	38.43	661	19	56	1.9822	0.944511	1.05875	0.75634	1.61244
Q9VEU9	FI21838p1	CG14883-RA	9.09	330	2	2	0.765532	0.781132	1.04356	1.56808	0.592219
Q9W259	FI23916p1	CG13506-RA	10.34	503	5	7	0.956744	1.04521	0.806297	1.2651	0.966478
A1ZAC7	Fidipidine	fidipidine	10.42	595	6	6	0.840193	1.03333	0.938944	1.12327	0.908502
O61604	Fimbrin	Fim	35.63	640	2	37	0.957005	1.20357	0.84405	1.24755	1.03298
Q9VL78	FK506-binding protein 59	FKBP59	54.44	439	24	41	1.00443	1.02834	0.995591	1.02967	1.00371
Q7K7A9	Flap endonuclease 1	Fen1	7.27	385	2	2	0.345253	1.42972	0.97763	0.83384	0.979852
Q867Z4	Longitudinals lacking protein, isoforms F/I/K/T	lola	11.44	970	2	9	1.40176	0.708319	0.707138	0.987418	1.24521
P10552	FMRFamide-related peptides	FMRFa	8.36	347	3	6	1.16524	0.972336	1.09333	1.07093	0.987669
Q7KSD3	Frayed, isoform A	fray	18.66	552	10	13	0.996617	0.903548	1.2805	1.00339	0.831986
P37236	Frequenin-1	Frq1	54.01	187	4	14	1.04624	0.891053	0.957643	1.00905	0.985048
P07764	Fructose-bisphosphate aldolase	Ald	68.7	361	3	326	1.13729	1.10077	0.879418	1.05084	1.15946
Q7K3S3	Fuseless, isoform A	fusl	7.28	453	2	2	0.682954	1.25898	1.17782	1.09287	0.855218
P20353	G protein alpha i subunit	Galphai	14.37	355	3	19	0.996523	0.755433	0.834771	1.09613	0.907325
Q9VS44	CG8607	CG8607	18.18	275	3	4	2.11389	0.741433	1.09506	0.677788	1.61059
P23625	G protein alpha q subunit	Galphaq	31.44	353	11	25	1.22106	1.14251	0.851454	1.08573	1.2201
P32865	G protein-coupled receptor kinase 1	Gprk1	21.86	700	14	22	0.972876	1.10716	0.964449	1.16427	0.977131
P32866	G protein-coupled receptor kinase 2	Gprk2	7.98	714	5	6	0.959975	1.02088	0.863407	1.00936	1.05772
O97422	Galactosylgalactosylxylosylprotein 3-beta-glucuronosyltransferase I	GlcAT-I	5.23	306	2	2	0.819467	1.01803	0.957195	1.28602	0.819134
Q95RA9	Gamma-interferon-inducible lysosomal thiol reductase 1	GILT1	20	250	4	6	1.25294	0.99776	0.950028	0.94817	1.1857
Q9VCK1	Gamma-interferon-inducible lysosomal thiol reductase 2	GILT2	16.91	207	3	3	1.33587	0.985693	1.0092	0.983535	1.16501
Q9W3Y4	GAS2-like protein pickled eggs	pigs	3.68	977	3	3	0.924905	1.03195	0.896402	1.15204	0.955291
Q9W1J3	Gastrulation defective protein 1 homolog	CG5543	6.26	655	4	5	0.971619	0.958003	1.11662	1.00695	0.908672
Q9W3J1	Gbeta5	Gbeta5	34.64	358	11	16	1.08976	0.99838	0.942305	1.03485	1.05613
Q9VGR1	GCC88 ortholog	GCC88	4.6	695	3	3	0.93614	0.907639	1.06904	1.10094	0.849675
Q7K0S5	GDI interacting protein 3, isoform B	Gint3	26.08	441	11	16	0.903814	0.976995	0.874108	1.03161	0.98693
Q9VLB7	GDP dissociation inhibitor, isoform A	Gdi	62.53	443	29	130	1.08127	1.05205	1.0388	0.935543	1.08052
Q9V6X7	GDP-fucose protein O-fucosyltransferase 1	O-fut1	12.44	402	5	6	1.1335	1.1296	1.04697	0.985099	1.11369
Q9VMW9	GDP-mannose 4,6 dehydratase	Gmd	16.2	395	5	6	1.02035	1.10349	1.12593	0.924625	1.03574
Q95TK5	CG1635	CG1635	30.13	448	12	21	1.78329	1.01159	0.988546	0.751465	1.60624
Q8SY61	General odorant-binding protein 56d	Obp56d	13.74	131	2	2	1.39664	0.904618	1.275	1.3799	0.866797
Q9VTU2	NADH dehydrogenase (Ubiquinone) SGDH subunit, isoform A	ND-SGDH	16.67	186	4	6	1.67401	1.07848	0.888206	0.827997	1.60382
Q05913	General transcription factor IIF subunit 1	TfIIFalpha	9.71	577	5	5	0.900591	1.00756	0.890024	1.04549	0.985862
P41900	General transcription factor IIF subunit 2	TfIIFbeta	14.08	277	3	4	0.975418	1.14639	1.01917	1.09539	1.00343
A1Z933	GEO02273p1	CG33672-RA	38.37	86	3	6	1.13187	0.989503	0.966546	1.01061	1.07294
B7Z0I5	GEO02494p1	CG42245-RA	17.88	151	3	3	1.13873	1.06056	1.02921	1.07929	1.04306
Q9VZE2	GEO04055p1	CG15012	15.13	152	2	2	1.0214	0.917513	0.958965	0.893311	1.04677
Q9VHK6	GEO04668p1	IscU	37.01	154	5	6	1.7583	0.989795	1.01031	0.885833	1.44931
Q9VGK3	GEO05125p1	CG14715	41.3	138	5	7	1.20697	1.02826	0.978961	0.998347	1.13044
Q9VNV2	GEO05133p1	CG11523	19.62	158	2	2	0.979106	0.893683	1.05064	1.01282	0.907596
Q7KLX3	GEO05407p1	Tapdelta	28.31	166	5	7	0.758469	1.11733	0.81226	1.45478	0.82742
Q9VU46	GEO07182p1	CG11279	23.53	102	3	3	0.936176	1.02779	0.972964	1.17304	0.915171
Q9VST4	CG5144	CG5144	8.25	388	3	5	1.91333	0.786719	0.927457	0.764255	1.59604
Q9VUZ8	GEO07442p1	PDCD-5	42.11	133	5	6	1.05465	1.01228	0.998539	1.00146	1.03347
Q9VVU2	GEO07453p1	RpL26	38.26	149	7	16	1.01901	0.943835	1.23573	1.06769	0.852141
Q9VNB9	GEO07455p1	RpL35A	32.48	157	6	11	1.05683	0.818313	1.087	1.14858	0.83877
Q4V5I9	Succinate dehydrogenase assembly factor 2-A, mitochondrial	CG14757	15.95	163	2	6	1.55471	0.981046	1.01932	0.699805	1.47503
Q9W1B9	GEO07602p1	RpL12	44.85	165	5	14	0.997024	1.00298	1.07052	1.12483	0.911018
Q9VMH8	GEO07746p1	Pfdn1	22.22	126	3	5	1.0356	1.06901	1.07596	0.941256	1.04333
Q9VY92	GEO07753p1	CG11151	49.57	115	5	11	1.16658	0.983644	1.05714	1.00926	1.04057
O97454	GEO08125p1	l(1)10Bb	27.78	144	4	4	1.0268	1.02633	1.02574	0.712656	1.18105
Q9W1F8	GEO08248p1	Orcokinin	27.82	133	3	5	1.21317	1.06556	0.818769	0.973532	1.2714
Q9VII5	GEO08323p1	CG31676-RA	20.75	159	3	4	1.09319	0.909173	0.838985	1.08127	1.04276
Q9VJI7	GEO08441p1	LSm7	13.64	110	2	2	1.08791	1.07603	1.01941	0.954209	1.09643
Q8MLP9	GEO08457p1	CSP1	16.96	112	2	2	1.01548	0.889818	1.13882	0.956396	0.909358
Q9VMI2	GEO08832p1	CG13994	27.61	163	3	3	0.980422	1.08511	0.983032	1.01726	1.03261
E1JIY8	GEO08993p1	CG42498-RA	31.53	111	3	4	1.01063	0.890963	1.24711	0.989478	0.850222
Q9VAC4	GEO09167p1	Nph	38.46	156	6	17	1.09892	1.08792	1.01172	0.98565	1.09486
Q9VF15	GEO09476p1	glob1	39.22	153	7	16	1.08856	0.988927	1.14235	0.908163	1.01315
Q9V3T9	NADPH:adrenodoxin oxidoreductase, mitochondrial	dare	20.17	466	9	12	1.72095	1.03858	0.962856	0.770011	1.59246
Q7KMS3	GEO09640p1	robl	50.52	97	3	7	0.852794	1.10355	1.01638	1.06944	0.937925
Q9VMX4	AT19154p	Scox	23.9	251	4	4	1.69526	1.0764	0.854841	0.886258	1.5919
Q9VJL6	GEO09696p1	GMF	13.77	138	2	2	1.05075	1.04241	1.10124	0.946076	1.02239
Q9VCI0	Probable oligoribonuclease	CG10214	11.37	211	2	2	1.86363	0.967101	1.03402	0.750534	1.58624
Q0E8V7	GEO11073p1	Tim13	42.86	84	3	6	1.40404	1.00819	0.991872	0.749462	1.38528
Q9VD00	CG5377	CG5377-RA	17.63	278	5	10	1.55944	0.948974	1.05377	0.758161	1.38439
Q9VZ24	GEO11412p1	CG15201	48.67	113	7	15	1.01476	0.833289	1.09475	0.90183	0.925609
Q7K1D7	CG1358, isoform A	CG1358-RB	8.51	482	4	7	0.911924	1.09658	0.524092	1.16735	1.18746
Q9VTE1	GEO12001p1	CG32069	26.25	80	2	2	0.867042	0.953983	0.983026	1.01727	0.910379
Q9VZC8	GEO12024p1	CG15019	13.01	146	2	2	0.957095	0.912468	1.14041	0.918041	0.908236
Q9VZZ5	GEO12033p1	CG16986-RA	23.78	143	3	3	1.61012	0.889656	1.01532	0.851843	1.33881
Q2MGK7	GEO13330p1	CG33995-RB	29.92	127	5	8	0.961312	0.869224	1.14496	0.858023	0.913903
Q9VZE9	GEO13389p1	VhaM9.7-a	21.18	85	3	8	0.91575	0.922745	0.900336	0.877262	1.03426
A1Z8U7	GEO13458p1	CG33964-RA	14.18	141	2	2	0.788199	0.904266	0.911548	0.982567	0.893539
Q9V4E0	LD47962p	ND-49	32.91	468	11	17	1.84455	0.948848	0.991115	0.771509	1.5848
Q9VFE7	GH01087p	Nup93-2	4.02	796	3	3	0.855327	0.973798	0.933786	0.911895	0.991029
O18333	GH01619p	Rab2	52.58	213	10	17	0.944313	0.931999	0.985424	1.09406	0.902296
Q7K3Z3	GH01724p	p47	55.77	407	16	33	1.01547	1.06697	0.984769	1.0424	1.02726
Q9VZJ3	GH01794p	Rcd5	9.34	578	5	5	0.98235	0.973892	0.944952	1.05107	0.980069
Q7K3Y9	GH02025p	CG17739	3.21	873	3	3	1.00569	0.813733	0.916603	1.0022	0.948205
Q9VPR1	GH02075p	Tspo	15.14	185	2	3	0.833867	0.809613	1.08157	0.710956	0.916851
Q9VCW6	GH03051p	Gclm	24.91	285	7	10	1.14553	1.01049	1.19532	0.976478	0.992736
Q9VVL7	Dihydrolipoyl dehydrogenase	CG7430	42.06	504	20	92	1.80574	0.969148	1.03183	0.720898	1.58318
Q9VNF5	3-oxoacyl-[acyl-carrier-protein] synthase	CG12170	20.55	438	7	8	1.72006	0.937184	0.990884	0.702568	1.56913
Q9VEP9	GH03554p	CG16941	16.71	784	13	15	0.779913	1.07064	0.825168	1.03869	0.992864
Q9VT38	GH03795p	CG18178	16.31	374	6	7	1.04219	0.868801	1.0116	1.0504	0.926766
P38040	Guanine nucleotide-binding protein subunit gamma-1	Ggamma1	37.14	70	2	3	0.924814	1.0813	0.653628	1.26381	1.04625
Q9VN91	GH04877p	rtp	9.6	198	2	2	1.54204	0.995826	0.999865	0.878248	1.35129
Q9VXP3	GH05406p	mRpS30	5.92	557	3	3	1.31452	0.753558	0.965691	1.03553	1.03341
Q9VD30	GH05294p	rdhB	23.39	248	6	8	1.35114	0.77067	1.56778	1.00025	0.826239
Q9VZ67	Uncharacterized protein	CG15210	28.99	69	2	2	0.976739	1.14792	0.667216	1.02381	1.25643
Q9VLM9	GH05949p	CG17294	39.22	255	10	21	1.15542	0.948268	1.08686	0.844056	1.08947
Q95U54	GH06271p	Mms19	18.67	959	17	18	0.997916	1.00209	1.1033	0.744635	1.08229
Q5U0V7	GH06496p	Synj	29.56	1218	32	77	0.994657	0.979975	0.9156	1.01517	1.02272
Q9VTB3	GH06691p	CG11811	25.32	233	6	7	1.43793	0.975746	0.912421	1.02486	1.24591
Q9VD14	GH07286p	CG13850	19.5	564	9	12	1.15447	1.06091	0.815692	0.942591	1.25997
Q9VEK8	GH07711p	sds22	29.75	326	11	14	1.16599	1.00162	1.05233	0.881866	1.12068
Q9VAY9	GH07821p	mRpS22	19.34	393	6	6	1.5039	0.858051	0.990769	0.775904	1.33695
Q9VJ75	GH08340p	CG10413	3.61	941	4	5	0.839421	0.969824	0.852382	1.19419	0.884036
P08928	Lamin Dm0	Lam	49.68	622	31	42	1.06582	0.9362	0.697093	0.938246	1.22422
Q9VDH3	GH08630p	Ktl	55.7	228	12	41	1.23505	0.913093	1.43706	0.84723	0.940398
Q24090	GH08712p	Snr1	29.73	370	9	15	0.837238	0.98128	0.964208	1.07504	0.891759
Q7K1H0	GH09096p	CG6491	9.88	324	3	3	0.741208	1.38865	0.874595	1.00163	1.13518
B7Z107	GH09380p1	cin-RB	33.7	92	3	6	1.44169	0.903123	1.00393	0.941783	1.20512
Q961Q8	GH10454p	CG10562	8.15	405	4	5	0.821107	0.802466	1.16264	0.832093	0.813931
Q9VKY3	ATP-dependent Clp protease proteolytic subunit	CG5045	13.83	253	4	7	1.60781	1.05918	1.05721	0.646509	1.5654
Q7K568	GH10642p	hebe	4.39	456	2	2	1.10023	0.815008	1.16442	0.860286	0.945934
Q8MZI3	GH10652p	CG10077	27.38	818	4	32	0.741513	1.00477	0.714611	1.11993	0.95189
Q95U34	GH11113p	Galk	10.82	490	5	6	0.916185	0.867177	1.2443	0.998833	0.79503
Q9W4A0	GH11193p	Rab18	34.52	197	6	8	0.960513	1.06297	0.755857	1.04013	1.12667
Q9V3Z4	GH11341p	Rpn5	19.52	502	10	15	1.01595	0.984299	1.05342	0.954525	0.996171
Q9VUW4	GH11740p	CG17027	10.07	288	3	3	1.06918	0.837564	1.16819	0.795788	0.970858
Q9W0C3	GH11843p	CG13928	37.96	245	7	11	1.00018	0.999819	0.925226	1.05193	1.01156
Q8SY53	GH11935p	Ostgamma	11.52	330	4	5	0.806606	1.20053	0.872004	1.46172	0.860056
Q9VW76	GH12423p	CG14186	4.83	704	3	3	0.80591	0.983454	0.788795	1.07245	0.961378
Q9W0K2	GH12537p	Trh	9.01	555	5	5	0.920495	1.03002	1.0294	1.13266	0.902157
Q9VH81	GH12714p	PpD3	21.35	520	11	18	1.0834	1.08459	0.995788	1.05518	1.05706
Q9VAW3	GH12731p	Gfat2	42.46	683	20	28	1.02825	0.964758	1.14211	0.982235	0.938179
Q7JXF5	GH12838p	Nup62	31.98	394	10	13	0.976371	0.968988	0.881035	1.0242	1.02106
Q9U6R9	GH13039p	gammaSnap1	53.97	302	17	42	1.02064	1.02377	0.902128	0.987595	1.08186
Q9W022	CG8993	CG8993	28.87	142	5	29	1.65506	1.01662	0.983654	0.825189	1.47701
Q9W438	GH13296p	Mipp2	12.36	453	4	4	0.939016	0.870212	1.211	1.04483	0.802022
Q9VBT7	GH13495p	CG10513	13.98	422	6	8	0.9613	0.811807	1.08191	0.979583	0.86011
Q8IR23	GH13542p	vap	5.35	954	5	8	0.93461	1.06429	0.83496	1.02444	1.07502
Q9VXQ5	GH13725p	Tcp-1zeta	42.4	533	21	36	1.08042	1.17672	0.99451	1.05832	1.09953
Q8T0Q4	GH13992p	shrb	76.11	226	15	28	1.06786	0.99396	1.01347	1.01683	1.01553
Q9VFC2	GH14439p	Spn88Ea	22.01	427	9	9	1.14813	0.892219	1.05623	0.94676	1.01865
Q9VN02	GH14561p	Vps24	29.15	223	5	7	1.05217	1.02982	0.987947	1.08412	1.00479
Q7KK90	GH14654p	GstE1	17.86	224	4	5	1.06302	0.69133	1.64252	0.70356	0.74778
P91927	LETM1 and EF-hand domain-containing protein anon-60Da, mitochondrial	Letm1	13.72	1013	11	16	1.5529	1.13591	0.865581	0.852492	1.56501
Q9VU77	GH14974p	CG10133	8.23	316	2	2	1.01941	0.850007	1.11766	0.557455	1.11599
Q9VWK5	GH15225p	Ulp1	4.23	1513	4	4	0.813314	1.00013	1.02396	0.999875	0.89604
Q9W0D3	GH15728p	CG13917	5.3	2019	10	12	0.776676	0.960029	0.793149	1.19832	0.872074
Q95NU8	GH16255p	jeb	21.79	560	11	21	0.985573	1.08055	0.92664	1.01464	1.06431
Q8I941	GH16843p	CG32485	22.97	222	6	9	0.883214	1.15224	1.03169	1.24071	0.895729
Q7K2Q8	GH17639p	Trs31	20.1	194	4	5	0.971069	0.97421	1.06032	1.00287	0.94285
Q9VE73	GH17724p	CG12333	24.44	487	11	15	1.00367	1.11622	0.985596	1.07703	1.02776
Q9W483	GH18971p	CG15772	16.99	259	4	5	0.867955	0.981815	1.14571	0.739115	0.981402
Q9W337	GH19985p	CG32700	58.26	218	11	22	1.07149	1.0173	0.994475	1.00556	1.04438
Q9VDU1	GH20840p	CG11407	10.04	538	4	6	1.16927	0.770565	1.0445	1.0183	0.940387
Q9VNA3	GH21273p	CG11999	30.09	216	6	9	1.18497	1.09281	1.00365	1.07001	1.09843
A8JR25	Fasciclin 1, isoform D	Fas1	44.41	662	2	176	1.02881	1.0032	0.634515	0.996814	1.24562
Q9V4E7	Transporter	Gat	13.68	636	3	22	1.04721	1.03915	0.525978	1.25987	1.16827
Q9VP78	GH23156p	ICA69	10.46	411	4	5	0.887128	0.866887	1.0053	1.17569	0.804227
Q9VJU8	GH23407p	NimB4	5.36	448	3	3	1.22544	0.928589	0.829766	1.09192	1.1209
A8JNU6	Neural conserved at 73EF, isoform I	Nc73EF	50.68	1105	2	127	1.5772	1.06511	0.918713	0.938873	1.42244
Q9VIU5	GH24474p	CG10137	9.56	941	9	11	0.79189	1.03434	0.966804	1.12159	0.874463
Q8T0L3	GH24511p	Uba1	41.73	1191	2	110	1.07164	1.11945	0.839683	1.00808	1.18581
Q9VIU8	GH25853p	CG10132	15.87	1361	25	32	1.00481	1.04563	0.694685	1.01549	1.19896
Q9VZU0	GH26392p	CG12032	12.61	111	2	2	1.01782	1.05211	0.882034	1.17517	1.00619
Q95SH0	GH26463p	Pask	2.94	985	3	3	0.886208	0.886364	1.12124	0.951051	0.855367
Q7K2L7	GH27120p	CG17765	12.56	199	2	3	0.871217	0.768676	1.07622	1.02565	0.780205
Q7K3N1	GH27401p	HPS1	6.71	596	4	5	1.06185	0.983243	0.889659	1.15979	0.997876
Q7JV09	GH28348p	jp	2.85	1054	2	2	0.755399	1.02682	0.563225	1.10656	1.06733
Q6NL44	GH28815p	CG31188	19.46	478	9	9	0.995653	1.0044	1.14893	0.99426	0.933213
Q9VI66	GH28833p	CG2640	27.89	251	8	12	0.965104	0.871068	0.931304	0.778388	1.07398
P52029	Glucose-6-phosphate isomerase	Pgi	38.71	558	21	74	1.2812	1.01926	1.24184	0.981106	1.03487
Q9VZ04	Glucosidase 1, isoform B	GCS1	12.01	849	10	11	0.840528	1.08284	0.855192	1.19268	0.939202
Q9VJD1	Glucosidase 2 beta subunit, isoform A	GCS2beta	20.07	548	10	12	0.970358	1.12198	1.00262	1.18458	0.956626
P33438	Glutactin	Glt	15.89	1026	13	19	0.821971	1.00171	0.998297	0.957919	0.932247
Q9Y166	BcDNA.GH02431	Dic1	10.36	280	2	2	1.04897	0.597136	1.03693	0.625925	0.989927
P20228	Glutamate decarboxylase	Gad1	41.96	510	20	248	1.09569	0.976056	1.15524	0.950867	0.983684
P54385	Glutamate dehydrogenase, mitochondrial	Gdh	44.31	562	5	130	1.92144	0.958129	1.12605	0.826486	1.47479
Q9W3K5	Glutamate--cysteine ligase	Gclc	15.34	717	11	13	1.02145	0.922177	1.01201	0.977344	0.977017
Q9VV59	CG4573	GluRS-m	5.68	511	3	4	1.69964	0.993048	0.96623	0.755025	1.56437
Q9VG92	Glutathione S transferase D8	GstD8	25.47	212	4	10	1.22697	1.01795	1.72975	0.982367	0.827736
Q9VGA0	Glutathione S transferase D9, isoform A	GstD9	32.57	218	6	14	1.26388	0.641	2.26187	0.86519	0.609162
Q9XYZ9	Glutathione S transferase E12, isoform A	GstE12	31.84	223	6	8	1.43039	0.908735	1.48537	0.856048	0.999018
Q7JVI6	Glutathione S transferase E13, isoform A	GstE13	18.58	226	4	6	1.04219	0.8984	1.08372	0.924813	0.966169
Q7JYZ9	Glutathione S transferase E2	GstE2	33.03	221	7	12	1.0336	0.887346	1.33942	0.802175	0.896969
A1ZB69	Glutathione S transferase E4	GstE4	37.84	222	8	18	0.860174	1.0019	1.38219	0.998104	0.782286
A1ZB71	Glutathione S transferase E6	GstE6	17.57	222	4	4	1.00159	0.770404	1.60936	0.998412	0.679505
Q9VSL5	Glutathione S transferase O2, isoform A	GstO2	35.06	251	7	8	1.22351	1.01822	1.11832	0.780631	1.18051
Q9VSL4	Glutathione S transferase O2, isoform B	GstO2	39.6	250	10	28	1.1752	1.08417	0.999792	0.950696	1.15837
Q9VSL2	Glutathione S transferase O3	GstO3	18.26	241	5	9	1.16307	0.983294	1.15993	1.01699	0.985964
Q9W125	NADH dehydrogenase [ubiquinone] 1 alpha subcomplex subunit 8	ND-19	14.86	175	3	4	1.69352	0.958717	1.04306	0.756468	1.47385
Q9W401	Probable citrate synthase, mitochondrial	kdn	51.29	464	21	139	1.85258	0.933058	1.07174	0.710101	1.56335
P20432	Glutathione S-transferase D1	GstD1	41.63	209	8	21	1.18322	0.933289	1.3293	0.936449	0.934131
Q9VG98	Glutathione S-transferase D2	GstD2	14.42	215	2	5	1.04087	0.821606	1.0079	0.992161	0.931211
P07486	Glyceraldehyde-3-phosphate dehydrogenase 1	Gapdh1	58.43	332	4	160	1.13432	1.01995	1.04346	0.980444	1.06441
P07487	Glyceraldehyde-3-phosphate dehydrogenase 2	Gapdh2	77.41	332	6	187	1.20306	1.11275	1.00643	0.993606	1.15788
Q9VQC4	Glycerate kinase	Glyctk	10.68	487	3	4	0.900107	0.803819	1.03635	0.89239	0.883439
O77477	CG4882, isoform A	CG4882	17.24	406	6	7	1.5095	1.02545	0.975183	0.797951	1.42964
Q8IQ70	Calcium uniporter protein, mitochondrial	CG18769	6.56	366	2	2	1.62101	0.789724	0.955121	0.588083	1.56217
Q9XTL9	Glycogen phosphorylase	GlyP	47.75	844	38	103	1.13008	0.995061	1.12526	0.986382	1.00639
Q9VVY3	Glycogen-binding subunit 76A	Gbs-76A	4.11	681	3	3	1.04379	0.850443	1.2445	0.972282	0.854495
Q9VAY2	Glycoprotein 93	Gp93	38.37	787	29	49	0.86543	1.20949	0.951067	1.22996	0.95135
O61613	Glycylpeptide N-tetradecanoyltransferase	Nmt	29.87	472	11	14	0.940822	1.0607	1.04909	1.02117	0.966796
A1Z6X6	Glyoxalase 1	Glo1	13.64	176	2	3	1.29675	1.02384	1.29671	0.890347	1.06106
Q7JXB5	RE12569p	CG10924	14.11	638	2	9	1.90698	0.988693	0.982861	0.871674	1.5614
P48604	GrpE protein homolog, mitochondrial	Roe1	29.58	213	7	15	1.6297	1.04256	0.959181	0.843702	1.48221
Q9VGT3	GM04645p	Ugt86Da	3.98	528	2	2	0.692258	0.980089	0.640366	1.23325	0.892578
Q9VSN9	GM04779p	SrpRbeta	10.25	244	2	2	1.00022	0.79153	1.03149	1.49326	0.709673
Q9VRG6	GM05135p	CG1704	11.52	243	3	3	1.004	0.906392	0.909497	0.996013	1.00256
Q9VR62	GM14138p	CG17598	9.83	651	6	9	0.922123	0.988453	1.0912	1.15012	0.852433
Q94920	Voltage-dependent anion-selective channel	porin	79.79	282	21	125	1.42365	1.09562	0.823593	0.912728	1.45092
Q9W3Q1	GM14286p	Pdp	9.47	475	4	5	1.38764	0.814081	1.03422	0.832486	1.17947
Q9W4J4	GM14292p	CG11444	24.19	215	6	9	1.05613	0.970965	1.03344	1.04162	0.976879
Q9VJ60	GM16226p	CG10343	22.9	214	5	6	0.992402	1.09956	1.00129	1.26378	0.923578
Q8SZA8	Ferredoxin 2	Fdx2	24.34	152	4	5	1.7253	1.01517	0.98506	0.841902	1.50002
Q7JVK6	GM27569p	trsn	23.83	235	5	12	1.26281	1.01296	1.31315	0.835414	1.0592
Q9W289	Golgi matrix protein 130 kD ortholog	GM130	30.82	795	23	28	0.986365	1.02952	1.00874	1.09075	0.960176
Q3ZAN1	Golgi pH regulator	GPHR	4.62	455	2	2	0.747707	1.02453	0.811778	1.44959	0.7837
Q9VN19	Golgi to ER traffic protein 4 homolog	CG9853	5.9	339	2	2	0.645	0.992586	0.871954	1.25574	0.769654
Q9W329	Golgi-localized, gamma-adaptin ear containing, ARF binding protein	Gga	10.15	660	7	7	0.952276	0.98541	1.20337	1.01481	0.87355
Q9W1R3	Golgin-245 ortholog	Golgin245	10.41	1489	14	15	0.992425	1.00763	0.982688	1.03938	0.989114
A1Z6H7	Gp210 ortholog, isoform A	Gp210	2.35	1876	4	4	0.80598	1.0779	0.798217	0.966055	1.0678
Q9VW57	Grasp65	Grasp65	10.87	460	4	4	0.977508	0.892145	1.13392	1.02301	0.86681
Q0KI15	GEO11096p1	CG34150	49.64	137	6	7	1.77945	1.00827	0.991801	0.865393	1.50104
Q8IRE3	Gryzun	gry	11.36	1320	12	12	0.978534	0.96622	1.02194	1.11628	0.909521
E2QCN9	GS1-like, isoform B	Gs1l	27.27	231	2	9	1.06501	0.81388	1.03155	0.969412	0.93899
Q6NP69	GST-containing FLYWCH zinc-finger protein	gfzf	8.61	1045	7	10	0.889278	1.07465	0.767792	1.14979	1.02417
P48596	GTP cyclohydrolase 1	Pu	5.86	324	2	2	1.20272	1.09444	1.01631	0.983952	1.14843
Q9VGP7	Mitochondrial ribosomal protein L40	mRpL40	11.22	196	2	2	1.65868	1.00487	0.73145	0.975282	1.56061
A8JNN5	GTPase activating protein and centrosome-associated ortholog, isoform B	GAPcenA	7.62	1194	3	9	0.83501	1.03467	0.997193	1.27764	0.821899
Q9VZ23	GTP-binding nuclear protein Ran	Ran	49.07	216	9	15	1.08375	1.00349	1.03438	0.880247	1.09016
P32234	GTP-binding protein 128up	128up	29.35	368	8	11	0.834855	0.975167	1.05022	1.03519	0.867946
Q9VND8	GTP-binding protein Rheb homolog	Rheb	13.74	182	3	3	0.94544	1.12316	0.936241	1.27794	0.93425
Q9VLP3	Guanine nucleotide exchange factor MSS4 homolog	CG7787	50.82	122	5	7	1.079	0.933029	1.04895	0.842196	1.06392
P26308	Guanine nucleotide-binding protein subunit beta-1	Gbeta13F	35	340	11	52	1.02416	0.970075	0.658153	1.09037	1.14052
P29829	Guanine nucleotide-binding protein subunit beta-2	Gbeta76C	54.34	346	16	37	1.50127	0.988895	1.0585	0.996423	1.2118
O18640	Guanine nucleotide-binding protein subunit beta-like protein	Rack1	34.28	318	6	21	1.14835	0.800944	1.1446	0.853191	0.975722
Q7K1C5	CG6406, isoform A	CG6406	6.62	544	4	5	0.975326	1.16068	0.634206	1.0253	1.28713
Q8MT06	Guanine nucleotide-binding protein-like 3 homolog	Ns1	7.06	581	4	4	0.847143	0.985065	1.25487	0.896163	0.85178
Q9VAM9	Guanosine-3',5'-bis(diphosphate) 3'-pyrophosphohydrolase MESH1	Mesh1	15.64	179	3	5	1.00634	1.08768	1.17385	0.980492	0.972
Q9VA09	Guanylyl cyclase beta-subunit at 100B	Gycbeta100B	26.94	787	21	27	0.984244	1.08139	0.918956	1.1424	1.00207
Q9V3U2	H/ACA ribonucleoprotein complex subunit 2-like protein	NHP2	18.13	160	4	5	1.25526	0.947381	0.876854	0.984591	1.1833
O44081	H/ACA ribonucleoprotein complex subunit 4	Nop60B	8.07	508	2	4	1.26412	0.859038	0.793939	0.913565	1.24343
Q07093	Head-specific guanylate cyclase	Gycalpha99B	26.92	676	16	28	0.92838	0.957545	1.04434	1.08738	0.884697
P29844	Heat shock 70 kDa protein cognate 3	Hsc70-3	45.73	656	26	118	1.00734	1.01166	0.992711	1.10462	0.962653
P11147	Heat shock 70 kDa protein cognate 4	Hsc70-4	62.52	651	26	251	1.00319	1.03882	0.977518	1.11234	0.977103
Q9W1H8	GH13256p	Thiolase	21.32	469	11	19	1.58339	0.966198	1.03498	0.897376	1.31942
P02516	Heat shock protein 23	Hsp23	70.43	186	13	85	1.14074	1.03942	1.00558	0.965735	1.10594
P02517	Heat shock protein 26	Hsp26	52.4	208	8	29	1.13527	1.18725	0.953412	1.00033	1.18875
P02518	Heat shock protein 27	Hsp27	56.81	213	13	33	1.20806	1.13289	0.933615	0.955589	1.23912
P05812	Heat shock protein 67B1	Hsp67Ba	11.34	238	3	4	1.00841	0.889779	1.18009	0.999891	0.870736
P22979	Heat shock protein 67B3	Hsp67Bc	40.7	199	6	15	1.12757	1.06358	0.979664	0.95937	1.13002
O97125	Heat shock protein 68	Hsp68	37.64	635	15	38	0.948323	0.946754	0.967374	1.02999	0.948788
P02828	Heat shock protein 83	Hsp83	48.26	717	35	134	0.99215	1.14738	1.02813	1.11231	0.999573
Q24113	FI21126p1	nonA-l	11.59	630	4	6	0.975689	1.24537	0.705464	1.35288	1.07905
Q9VF20	Heavy metal tolerance factor 1	Hmt-1	4.04	866	3	3	0.836162	0.977548	1.02297	1.16648	0.828389
Q9VGJ9	Heme oxygenase	Ho	21.62	296	7	9	0.873802	1.0205	0.979912	0.978834	0.967099
Q960X8	Hepatocyte growth factor-regulated tyrosine kinase substrate	Hrs	16.84	760	10	14	0.904473	1.00078	1.03374	0.961923	0.954698
P05205	Heterochromatin protein 1	Su(var)205	68.93	206	11	19	1.23675	0.999647	0.957717	1.00035	1.14214
Q9VCU6	Heterochromatin protein 1c	HP1c	21.52	237	5	5	0.908539	1.07899	1.00706	0.963406	1.00866
P48809	Heterogeneous nuclear ribonucleoprotein 27C	Hrb27C	40.38	421	10	16	0.989497	0.960928	1.16328	0.90847	0.941439
P48810	Heterogeneous nuclear ribonucleoprotein 87F	Hrb87F	35.06	385	11	34	1.14882	1.09752	0.969186	0.955769	1.16696
Q9W3C4	Hexosaminidase 2	Hexo2	40.51	622	19	40	1.19066	0.861059	1.22768	0.909114	0.960186
Q05783	High mobility group protein D	HmgD	26.79	112	2	4	1.30149	0.989116	0.840988	0.902727	1.31363
Q06943	High mobility group protein Z	HmgZ	34.23	111	3	7	1.12095	1.15974	0.923831	0.906033	1.24637
Q9VE46	High-affinity choline transporter 1	CG7708	14.82	614	8	13	0.79969	1.08596	0.63029	1.13342	1.06914
Q94517	Histone deacetylase Rpd3	Rpd3	16.51	521	7	9	1.03828	1.20193	0.953166	1.09055	1.09614
Q9W0Y6	Transient receptor potential cation channel protein painless	pain	14.9	913	4	15	0.934989	1.06953	0.674316	1.29078	1.02006
Q9V6Y3	Probable 28S ribosomal protein S16, mitochondrial	mRpS16	14.73	129	2	3	1.63171	0.935328	1.00546	0.812498	1.41205
P37193	Adrenodoxin-like protein, mitochondrial	Fdxh	30.23	172	4	6	1.66258	0.929528	1.07581	0.748648	1.42075
Q9VNI3	Histone PARylation factor 1-like	CG1218	11.58	449	6	7	0.937249	1.121	0.882704	1.09976	1.03822
Q32KD2	Histone-lysine N-methyltransferase eggless	egg	4.52	1262	4	4	0.926699	0.955118	0.916679	1.04846	0.957601
Q9VP06	HL02815p	CG11306	14.53	475	6	6	0.859813	0.982505	1.02685	1.23453	0.814687
Q9VHY7	HL04706p	wtrw	12.27	986	2	14	0.741782	0.864842	0.796727	1.15628	0.822641
Q7K187	HL07962p	Tango10	4.6	587	3	3	1.05834	1.10591	1.02373	0.882836	1.13515
Q9VL70	HL08109p	yip2	47.24	398	16	35	1.54255	0.891656	1.25142	0.804624	1.18392
P40427	Homeobox protein extradenticle	exd	8.78	376	3	4	0.821499	0.96639	1.06804	1.03734	0.849199
Q0E8S7	Homer, isoform E	homer	39.36	531	4	36	1.01554	0.941199	0.790819	1.18357	0.991059
Q7JR83	Hormone-sensitive lipase ortholog, isoform A	Hsl	6.36	881	5	5	0.776064	1.03658	0.788179	1.10911	0.955388
Q9V4C8	Host cell factor	Hcf	14.93	1500	20	27	0.836211	0.993873	0.954994	1.04326	0.915841
Q9VNI8	Hpr1	Hpr1	7.13	701	5	5	1.039	0.796509	1.04061	0.962461	0.916348
Q86DS1	Hsc70-interacting protein 2	HIP-R	38.2	377	16	40	1.12961	1.0821	0.994617	1.00541	1.10584
Q9VPN5	Hsp70/Hsp90 organizing protein homolog	Hop	52.24	490	26	51	1.10559	1.10399	0.980565	1.02531	1.10155
Q24276	Hsp90 co-chaperone Cdc37	Cdc37	25.96	389	8	10	0.865666	1.02262	0.929996	1.19069	0.890414
Q9V3N4	Huntingtin, isoform A	htt	1.37	3583	6	6	0.970324	1.06166	0.995484	1.15323	0.945676
Q7K1S1	CG8067, isoform A	CG8067	14.71	333	5	5	1.52274	1.08248	0.923802	0.910311	1.42043
Q9VHI1	Hyrax	hyx	10.78	538	5	6	0.903796	1.00745	0.869442	1.11047	0.965317
Q9V428	Icarus, isoform A	ics	10.95	283	3	3	0.889417	1.00723	0.992826	0.876012	1.01488
Q8SY96	NFU1 iron-sulfur cluster scaffold homolog, mitochondrial	CG32500	19.08	283	4	6	1.52789	1.03578	0.965455	0.804815	1.44818
Q9V455	Importin subunit alpha	Kap-alpha3	22.37	514	10	17	0.865126	0.985189	1.05713	0.940643	0.926187
O18388	Importin subunit beta	Fs(2)Ket	6.11	884	5	5	0.561178	0.966107	1.32718	0.962011	0.667172
Q9VG97	Inactive glutathione S-transferase D3	GstD3	29.15	199	5	10	1.18359	0.954456	1.45703	1.02407	0.861734
P27716	Innexin inx1	ogre	15.19	362	6	6	0.88623	0.977647	0.667632	1.5567	0.837948
Q9V427	Innexin inx2	Inx2	30.52	367	10	12	0.776246	0.930419	0.62345	1.39523	0.845437
Q9VMW7	Inosine triphosphate pyrophosphatase	CG8891	43.98	191	7	12	1.15408	0.96473	1.07426	0.886535	1.08059
Q07152	Inosine-5'-monophosphate dehydrogenase	ras	23.65	537	10	12	1.06281	0.936299	1.00926	0.947699	1.02154
A0A0B4LGN1	Inositol 1,4,5,-tris-phosphate receptor, isoform C	Itp-r83A	9.19	2828	2	26	0.845268	1.01486	0.919421	0.985357	0.97656
Q9VFP6	Inositol polyphosphate 1-phosphatase	Ipp	41.33	375	14	21	1.20079	0.99828	1.08658	0.945776	1.08203
O97477	Inositol-3-phosphate synthase	Inos	27.08	565	12	20	1.04314	0.873491	1.19381	1.05065	0.853939
P22817	Insulin-degrading enzyme	Ide	27.37	990	27	38	1.27371	0.985638	1.12215	0.849495	1.14592
Q9VAH9	Integrator complex subunit 11	IntS11	3.69	597	2	2	0.854688	1.05691	1.00012	0.744796	1.09552
Q9VBB3	Integrator complex subunit 12	IntS12	7.01	328	2	2	1.11262	0.926764	0.945731	1.05738	1.0181
Q7PLS8	Integrator complex subunit 3	IntS3	4.12	1068	3	3	0.78921	0.930363	1.20033	1.01306	0.776897
O44386	Integrin alpha-PS3	scb	1.7	1115	2	2	1.04411	0.957751	0.823639	1.11944	1.03025
Q9V400	Integrin linked kinase, isoform A	Ilk	4.02	448	2	2	0.877751	0.947579	0.683417	0.816473	1.21698
Q9VG73	Interleukin enhancer-binding factor 2 homolog	CG5641	34.34	396	11	16	1.00768	0.982345	1.10283	0.992374	0.949803
Q9V3Q9	IP03705p	GABA-B-R1	5.83	841	4	5	0.996841	1.0374	0.914059	1.30809	0.915439
M9NEC7	Hyperkinetic, isoform F	Hk	4.01	698	2	3	0.834703	0.914508	0.972087	1.55323	0.69267
Q9W2K2	IP04848p	LSm1	27.74	137	4	5	1.03127	0.799791	1.10829	0.934256	0.89646
Q9VP84	IP06402p	CG10581	15.87	189	2	6	1.03124	1.01708	0.772921	1.12772	1.0777
Q9VRJ6	IP07706p	Prpk	25.89	224	5	6	1.06865	0.935758	1.08795	0.865777	1.02594
Q9W3G8	IP08110p	CG15343	23	213	4	4	1.02363	0.928195	1.0423	1.12247	0.901629
Q4QQ49	IP09595p	CG15082	11.15	296	3	3	0.824224	1.0271	0.824243	1.00699	1.01097
Q9VUW1	IP09635p	CG17026-RA	9.86	284	2	2	0.996394	0.955596	1.51871	0.931637	0.796618
Q500Y7	GEO11443p1	UQCR-6.4	38.6	57	2	4	1.58078	0.476904	1.04148	0.938767	1.03911
Q9W019	IP09724p	CG15877	6.5	277	2	2	0.854414	0.751481	0.728951	1.17039	0.845499
Q4QQ70	IP09819p	CG15602	26.9	342	10	11	1.08758	0.999103	1.00308	0.987239	1.04842
Q29QQ9	IP10364p	Rrp42	8.78	296	2	2	0.933533	1.0336	1.08831	1.05083	0.91959
Q9VGF3	IP11040p	CG18547	4.93	345	2	2	0.984526	0.841938	1.39421	1.20856	0.701738
Q8IMT3	IP12392p	CG31436	5.95	420	2	2	1.3142	0.983974	1.59175	0.883554	0.928443
Q0KI81	IP14232p	CG14713	2.87	1429	3	3	0.772821	0.827749	0.909528	1.16979	0.769756
Q9W0H8	IP16409p	scf	44.98	329	5	13	1.13102	1.13714	1.00906	1.16546	1.04306
Q9VLT7	IP17351p	RpL36A	14.42	104	2	3	1.04288	0.821971	0.964741	1.01151	0.943631
Q9VA76	IP18706p	CG15537-RB	21.25	353	8	10	1.00698	0.993064	0.949348	1.02451	1.01327
A8E6W0	IP19808p	CG34039-RA	12.63	198	3	4	1.01078	1.07567	0.979676	1.07635	1.01479
Q9W249	IP21806p	CG10384-RA	4.07	492	2	2	0.941255	1.04036	0.960722	1.11699	0.953746
Q8T3X9	Iron-sulfur cluster assembly 1 homolog, mitochondrial	l(1)G0136	56.15	130	7	9	1.36959	0.899889	1.14334	0.892179	1.11494
Q8MSW0	Isoleucyl-tRNA synthetase, isoform A	IleRS	23.11	1229	27	32	0.976907	0.893511	1.03658	1.05222	0.895452
Q9TVP3	J domain-containing protein	jdp	63.08	195	11	61	1.06772	1.02287	0.977638	1.06205	1.02496
Q9VGR7	J domain-containing protein CG6693	CG6693	28.09	299	7	7	1.02998	0.986826	1.08812	1.00501	0.963537
Q9XTL2	Jak pathway signal transduction adaptor molecule	Stam	15.38	689	9	13	1.00808	1.15763	0.979577	1.15425	1.01494
Q9VHH9	JmjC domain-containing histone demethylation protein 1	Kdm2	5.72	1345	7	7	0.832807	0.954006	0.956763	1.13275	0.855132
Q9VT00	Jumonji, AT rich interactive domain 2	Jarid2	9.4	2351	18	19	1.01741	0.982887	0.757491	1.02946	1.11939
Q7JRC3	Juvenile hormone epoxide hydrolase 1	Jheh1	15.4	474	6	9	0.721166	0.955202	1.0469	1.1954	0.747612
Q7K1W4	Juvenile hormone epoxide hydrolase 3	Jheh3	10.47	468	5	7	0.898764	1.19391	0.910721	1.65637	0.815191
Q7K0P0	Juvenile hormone-inducible protein 26	JhI-26	9.57	439	4	5	1.00295	0.961517	1.10048	1.11421	0.887017
Q9VJ59	Jwa ortholog	Jwa	9.64	249	3	8	0.801739	1.04474	0.816513	1.28525	0.878539
Q9VKA4	Probable G-protein coupled receptor CG31760	CG31760	7.32	1093	7	7	0.899431	1.11181	0.555138	1.25223	1.11281
P17210	Kinesin heavy chain	Khc	48.62	975	43	88	0.996337	1.04462	0.915841	1.02937	1.04922
P46824	Kinesin light chain	Klc	51.18	508	2	41	1.02801	1.22582	0.798054	1.13454	1.16622
Q9VRK9	Kinesin-like protein	Klp64D	4.58	677	2	3	0.909712	0.922657	1.03174	1.12403	0.84998
Q960Z0	Kinesin-like protein Klp10A	Klp10A	15.03	805	9	13	0.950134	1.11434	0.956658	1.20071	0.956944
P46867	Kinesin-like protein Klp68D	Klp68D	5.99	784	4	5	0.999846	1.1808	0.949729	1.16984	1.02881
Q9W1J0	Transporter	CG5549	26.18	1188	21	30	0.954637	1.04752	0.582891	1.0989	1.19049
Q9V447	Krueppel homolog 2	Kr-h2	30.07	276	8	10	0.82082	0.958588	0.989366	1.20373	0.811368
Q8SX89	Kugelkern, isoform A	kuk	5.26	570	3	4	0.899855	1.16673	0.896217	0.982966	1.09972
Q9V393	Kurtz arrestin	krz	14.47	470	6	9	1.07984	0.926632	1.07593	0.834141	1.05047
Q9VMC9	Kynurenine formamidase	KFase	4.67	300	2	2	1.05276	0.984148	1.0263	1.01611	0.997307
Q9Y134	L.2.35Df	Mtr4	10.71	1055	9	9	0.990383	0.870605	1.03405	0.898798	0.962823
P40796	La protein homolog	La	27.69	390	10	22	1.1256	1.00916	1.12804	0.990082	1.00786
Q9VLP0	IP04187p	CG14274	14.44	187	3	3	0.933342	1.36254	0.923902	1.23284	1.06451
P19334	Transient receptor potential protein	trp	4.16	1275	3	5	1.675	0.894544	0.660743	1.09411	1.46425
Q00174	Laminin subunit alpha	LanA	6.52	3712	22	22	1.00215	0.997851	0.936333	0.936455	1.06793
P11046	Laminin subunit beta-1	LanB1	6.54	1788	10	11	1.01883	1.08281	0.968076	0.981515	1.07799
P15215	Laminin subunit gamma-1	LanB2	11.04	1639	16	17	0.916378	1.03311	0.870761	1.00672	1.03835
Q9Y0Y7	LanC-like protein 3 homolog	CG2061	9.31	419	3	4	1.16089	0.828188	1.39125	0.727588	0.938761
Q9VAW5	La-related protein 1	larp	7.29	1673	2	11	0.857221	1.04458	1.8153	1.19401	0.631975
Q9I7T7	La-related protein CG11505	CG11505	10.25	1531	13	16	0.944244	1.11413	0.90391	1.1106	1.02177
Q9VSD7	Lariat debranching enzyme	ldbr	9.36	534	4	4	1.01372	0.966108	1.02172	0.971672	0.993195
Q24388	Larval serum protein 2	Lsp2	12.41	701	8	8	2.3197	1.01647	1.35297	0.877005	1.49606
Q9VTZ4	LD02044p	nst	26.23	549	13	28	1.11038	1.03484	1.00785	0.992207	1.07258
Q7K180	LD02709p	Map60	17.73	440	9	15	0.980984	0.92992	1.01387	0.984335	0.956311
Q9W299	LD03212p	CG11474	32.34	436	12	19	1.15292	1.0591	1.13214	0.813979	1.13663
Q95RX5	LD03515p	CG11984	14.02	599	6	7	0.502346	1.07198	0.997724	1.08702	0.755165
Q9W1I8	LD03592p	Snap29	20.77	284	6	6	0.994994	1.00503	0.79667	1.00886	1.10772
Q7K172	LD04933p	ste24a	9.53	451	4	5	0.806621	0.993276	0.942224	1.05375	0.901763
Q8SX78	LD05679p	CG8446-RB	13.13	396	4	4	1.20669	0.767453	0.966949	0.698952	1.18503
Q9VDU7	LD05707p	Naam	24.09	357	7	8	1.12487	0.933856	1.15979	0.984978	0.959879
Q9VZX6	LD06441p	mRpS35	7.06	326	2	2	1.25046	0.907222	1.00506	0.830771	1.17531
Q9VYT5	LD06533p	CG10347	7.41	580	5	6	0.957542	0.919316	1.26979	0.982753	0.833218
Q7K159	LD06557p	mip40	35.96	267	8	10	0.967832	1.07819	0.903345	1.08714	1.0279
Q9V426	LD07162p	vig	48.57	490	22	35	1.14413	1.08873	0.952652	1.0497	1.11512
Q9VJZ5	LD07294p	Tap42	14.21	380	5	7	0.973684	1.15613	0.973191	1.07226	1.04125
Q9W542	LD07342p	mip130	9.33	986	8	9	0.835764	1.02124	0.958759	0.983999	0.95586
Q9VBU5	LD07939p	CG10425	8.04	336	2	2	0.922939	0.95665	1.03586	1.23895	0.82626
Q9W362	LD09531p	Larp7	13.28	595	6	6	0.942422	0.931678	1.03147	0.8848	0.977993
Q9VJ43	LD10783p	ScpX	17.65	544	5	13	1.09997	0.960349	1.10431	1.15952	0.910103
Q9VJ14	LD11955p	mib2	1.81	1049	2	2	0.949037	0.998195	0.879336	1.00181	1.03513
Q9W1I6	LD12035p	ytr	10.82	194	2	2	0.994098	1.06798	0.805346	1.19475	1.03099
Q9VXM4	LD12946p	MSBP	57.26	248	10	12	0.825757	1.12703	0.805305	1.38641	0.890985
Q9W486	LD13361p	CG32758	28.25	531	4	16	0.982902	0.980485	1.10036	1.00269	0.933593
Q7K126	LD13864p	Not3	5.45	844	5	5	0.935685	1.00403	1.06466	1.19627	0.857929
Q9W0B6	LD14179p	CG17249	9.32	472	4	5	0.959027	1.02313	1.08528	1.00254	0.949393
Q9VP57	LD15904p	pzg	25.4	996	19	34	1.08582	1.09454	0.883953	0.985487	1.16632
Q9VR53	LD15927p	wap	19.53	343	6	6	1.06776	0.996086	0.963594	1.00393	1.04896
Q9VQ78	LD16031p	TBCD	11.1	1189	13	16	0.984477	0.856895	1.05207	1.02486	0.886582
Q9VW59	LD16419p	RhoGDI	50.25	201	11	18	0.998077	0.953306	1.11251	0.99381	0.926443
Q9W423	LD18904p	schlank	7.25	400	3	3	0.856277	1.08292	0.850162	1.41925	0.854496
Q9VYB2	LD19061p	CG11178	9.62	707	7	7	0.917288	1.07487	0.965598	1.04611	0.990284
Q9VT75	LD19812p	vnc	25	196	5	7	1.20413	0.988433	1.1213	0.91841	1.07494
Q9W0S7	LD20211p	Tudor-SN	31.75	926	26	39	1.00481	0.992575	1.10626	1.01004	0.943812
Q9VTT2	LD20590p	l(3)j2D3	10.49	391	4	6	1.04521	1.05379	0.944001	1.0073	1.07569
Q9VY91	LD21074p	Pdcd4	12.97	509	7	9	0.838248	0.960826	1.04077	1.15369	0.819826
Q59E33	LD21442p	scaf6	6.88	960	4	6	0.818791	1.05146	0.937659	1.01265	0.95895
Q9VQG0	LD21546p	Trn-SR	2.04	932	2	2	0.976802	0.759562	1.85197	0.956033	0.618363
Q9W1G7	LD21576p	Nap1	24.32	370	7	11	0.953938	1.0824	0.976788	1.08362	0.988319
Q9VTZ5	LD22449p	Tsf2	5.01	819	4	4	1.02021	0.82531	0.943355	1.17306	0.872001
Q7KUA4	LD22577p	Uba2	30.29	700	19	25	1.05263	1.01374	0.991527	0.894696	1.09551
Q9VL91	LD23102p	zf30C	11.45	777	8	8	0.918408	0.969217	1.03176	1.17074	0.857035
Q9W2M0	LD23155p	Rbpn-5	30.76	647	19	22	0.980868	1.00893	0.991147	1.08757	0.957223
Q9VCH8	LD23303p	tst	6.02	1197	5	5	0.920996	1.04034	0.961224	1.08204	0.959903
Q7K0X9	LD23667p	Syx7	17.38	282	4	5	0.858254	1.03611	0.703803	1.28284	0.953548
Q9VCC9	LD23779p	Tsc1	5	1100	5	5	0.71207	0.866383	0.991574	1.06857	0.766186
Q9W461	LD23868p	CG16721	14.57	494	6	7	0.762139	1.00487	0.995157	0.947447	0.909607
Q9VHC0	LD23870p	RnpS1	16.84	374	4	5	1.06414	1.00058	0.873093	0.999419	1.10265
Q9VP77	LD23875p	CG10565	8.05	646	4	5	1.10163	0.862835	0.957444	1.00537	1.00084
Q9VIE8	Aconitate hydratase, mitochondrial	Acon	52.22	787	32	185	1.78041	0.994683	1.00535	0.773732	1.55985
Q9W3N9	LD24105p	CG10932	30.98	410	10	18	1.43886	0.939257	1.12422	0.959285	1.1414
Q9VYQ9	LD24662p	Tango4	7.68	482	2	5	0.999069	1.07011	0.836517	1.09459	1.0715
Q9VJD4	LD24721p	Sgt	26.89	331	10	16	1.01527	1.09008	0.984382	1.0985	1.01079
Q9V3E7	LD24793p	Ref1	41.35	266	13	38	0.986652	1.06248	0.838918	1.03552	1.0932
Q9VJE3	LD24839p	CG15141	13.61	404	5	5	0.871054	0.994625	1.08883	1.10639	0.84988
Q9VC06	LD37516p	CG11771	27.26	730	17	22	1.57718	0.935117	1.06938	0.794262	1.34806
Q9VI24	LD25151p	Zif	17.53	388	5	5	0.884059	0.975451	0.998072	1.00193	0.929753
Q9W436	GH03315p	Nep1	7.42	849	4	5	0.889339	1.06961	0.940569	1.06319	0.977637
Q9VHA8	LD25575p	P58IPK	21.89	498	12	12	0.928159	1.09589	0.896469	1.28002	0.929963
Q7K5K3	GH08474p	CG11876	42.47	365	11	55	1.84924	0.918934	1.08822	0.697978	1.54976
Q7K0D8	LD27030p	Nup50	10.64	564	5	6	0.90623	0.963445	0.772443	1.10395	0.996417
Q9VPL5	LD27216p	Tbc1d15-17	2.94	715	2	2	0.778282	0.825113	1.02515	0.975467	0.801451
Q9W0N6	LD27967p	Vti1a	8.26	230	2	2	0.778006	1.05563	0.832384	1.2205	0.893201
Q9VGM4	LD28119p	CG10898	8.82	340	3	3	0.864179	1.04716	1.11844	0.86308	0.96458
Q9VZS1	LD28127p	CG17746	11.59	371	4	4	0.896189	1.14734	0.978436	1.21207	0.932904
Q95RI2	LD28549p	CG10973	22.88	306	7	10	1.00469	0.972773	0.995336	1.04243	0.970404
Q9VMI9	LD28822p	mtm	16.16	619	8	8	0.959301	0.939107	1.05586	0.992905	0.926612
Q9VJW1	LD29171p	Sec71	4.05	1653	5	5	0.822518	0.782312	1.09957	0.996177	0.765757
Q9VLS5	LD29542p	Rbsn-5	23.37	505	9	11	0.920449	1.01574	0.947913	1.01981	0.983975
Q9VL71	LD29830p	Srp54	12.67	513	5	9	0.980405	1.0417	0.872434	1.07968	1.03585
Q9VN21	LD30155p	lost	46.97	545	25	53	1.01638	1.07143	0.954914	1.02992	1.05188
Q9VHM3	LD30467p	M1BP	14.59	418	6	8	0.911832	0.975846	0.843648	1.03767	1.00338
Q9VYT1	LD30509p	CG11802	22.92	349	6	7	0.721851	1.0965	0.840046	1.01079	0.982446
Q9VHG4	LD30634p	VhaM8.9	8.75	320	3	3	0.874487	1.11145	0.99109	1.22436	0.896404
Q9VI64	LD30995p	CG10098	52.69	353	15	78	1.11618	0.992653	1.14618	0.945734	1.00809
Q9VWF4	LD31102p	MKP-4	5.68	387	2	2	0.842525	0.969463	0.917297	1.0315	0.929798
Q9VN77	LD31216p	CG12007	5.44	515	3	4	0.960184	0.719628	1.12623	0.906449	0.826403
Q9VW40	LD31235p	CG14103	6.31	301	3	3	0.8645	1.12577	0.859724	1.02831	1.05415
Q9VL11	CG4957	CG4957	7.32	246	2	3	1.50305	1.1105	0.789625	0.900499	1.54636
Q9VFB6	LD32196p	CG12241	2.74	804	2	2	0.494972	0.825719	1.11706	1.25241	0.557378
Q9VHJ2	LD32381p	CG11975	19.71	340	6	8	0.99933	0.974902	1.04351	0.908481	1.01139
Q9V3T8	LD32469p	SC35	19.49	195	4	10	1.08093	0.997302	1.0834	0.922289	1.03617
Q9W3M7	LD32873p	mahe	19.47	945	14	21	0.933297	1.05878	0.996681	1.06668	0.965454
Q9V3D0	LD33485p	mRpL4	6.08	296	2	2	1.16013	0.826155	1.00618	0.676266	1.18059
Q9VB22	LD33695p	pins	15.35	658	9	13	1.07852	0.981162	0.838756	1.0192	1.10857
Q9VCK6	LD34157p	CG10184	9.92	383	3	3	1.12358	0.832751	1.35758	0.921391	0.85843
Q9VM62	LD34181p	SA	5.77	1127	6	6	0.874128	1.12475	0.966298	1.03488	0.998853
Q9W3M8	LD34211p	Ykt6	47.74	199	9	20	0.889552	1.16747	0.764245	1.213	1.04035
Q9VYR9	LD34222p	CG10362	5.79	1037	6	7	0.748731	1.09426	0.820265	1.50696	0.791926
Q9VK59	CG5787, isoform A	CG5787	20.95	950	20	22	0.97391	1.02679	0.736208	1.03946	1.12673
Q9VWD5	LD35087p	CG14232	6.25	480	2	3	0.932253	1.03663	1.12206	1.02186	0.918359
Q8MSB1	LD35157p	CG13638	14.47	394	4	4	0.956462	1.0014	1.10392	0.875665	0.989026
Q9VBX4	LD36051p	CG31510-RA	4.7	1150	5	5	0.774118	1.13798	0.849229	1.1835	0.940657
Q9VEJ1	LD36095p	SF1	4.96	787	2	4	0.927715	0.941609	1.06604	1.05972	0.879365
Q9W3H4	LD36273p	sni	56.28	247	11	17	1.39841	0.988996	1.01113	0.788912	1.32631
Q9V414	LD36341p	Smg5	11.89	1177	12	12	0.784873	1.02789	0.972867	1.15586	0.85157
Q9VEV7	LD36454p	CG17565	5.49	419	2	3	1.04596	0.80858	1.27556	0.695663	0.940807
Q9VK18	LD36945p	CG16812	12.97	455	5	5	0.880563	0.916575	0.953521	1.14086	0.858076
Q9VV52	LD37257p	RAF2	4.92	1117	4	4	0.873903	1.10136	0.872236	1.27555	0.919676
Q9VCA0	CG6356	CG6356	5.44	570	3	5	0.996497	1.00352	0.814601	1.69179	0.797964
Q9W379	LD37736p	Zpr1	8.1	457	3	5	0.944084	1.05434	0.979752	1.02067	0.999002
Q9VWP1	LD38070p	Usp39	12.35	494	6	7	1.10427	0.899124	0.988828	1.0113	1.00163
Q9VWD9	LD38919p	Ubqn	42.78	547	18	30	0.976282	0.942357	1.01429	0.932615	0.98548
O15971	LD39986p	Rab10	24.02	204	3	10	0.83198	1.09449	0.719204	1.12682	1.04358
Q9VII3	LD40063p	twit	10.84	166	2	2	1.12488	0.944886	0.772765	1.05833	1.13035
Q7K3B7	LD40177p	CG11208	12.32	568	5	6	1.08714	0.899303	0.974095	1.04121	0.985681
Q9V3W7	LD40489p	SF2	38.82	255	10	30	1.1357	0.987512	1.0095	0.941343	1.08835
Q7K4G8	LD40944p	CG12391	10.22	587	6	9	1.01358	0.842941	0.886216	0.986599	0.991301
Q9W253	LD41023p	mRpS29	13.27	392	5	5	1.72702	0.99524	0.981072	0.841898	1.49331
Q9VUM1	LD41209p	Prp31	9.98	501	5	5	1.08496	1.06911	0.9132	1.09855	1.07075
Q9VHJ7	LD41978p	CG11964	12.56	581	7	9	0.770239	0.880698	0.992815	1.00724	0.825447
Q9VGL0	LD43047p	CG14712	2.21	1266	2	2	0.864306	0.974471	0.772534	1.13497	0.963972
Q9VJI5	LD43175p	yellow-b	6.18	453	3	4	1.20727	0.905798	0.856214	0.958085	1.16468
Q9V3Y4	LD43650p	Mtch	26.27	316	6	10	1.09527	0.970721	1.00615	0.714956	1.20039
Q9VR79	LD43683p	obst-A	10.55	237	3	3	1.7402	1.03308	0.8922	0.967975	1.49088
Q8SX57	LD44221p	CG11005	51.75	257	9	14	1.05351	0.933595	1.00575	0.858661	1.06581
Q9VZ82	LD44376p	LeuRS-m	9.55	869	6	7	1.40877	0.930169	1.16404	0.732558	1.23323
Q9VZY0	LD45195p	Non2	27.05	244	7	19	1.15063	1.06421	0.973409	0.92104	1.16912
Q960M4	LD45324p	Prx5	76.84	190	11	45	1.57189	1.00804	0.992025	0.906273	1.35907
Q9VN88	LD45836p	Vps37B	20.56	214	4	5	0.934635	1.02838	0.935686	1.05984	0.983707
Q9V3P3	LD45860p	REG	22.04	245	5	10	0.977134	0.987711	1.124	1.01244	0.919682
Q9W501	LD45906p	temp	10.55	398	4	5	0.998663	1.01196	1.00392	0.933994	1.03752
A1Z9A8	Protein PTCD3 homolog, mitochondrial	CG4679	7.98	652	5	6	1.5345	0.99585	1.00417	0.932444	1.30659
Q95RB1	LD46870p	CG14641	4.55	418	2	2	0.877204	0.953046	1.1181	1.03886	0.848531
Q9VHI7	LD47007p	CG11982	12.63	380	3	3	0.783606	0.715373	0.983796	1.11341	0.714752
Q7K1Q7	LD47064p	RpLP0-like	8.59	256	2	2	1.20094	1.05098	0.932682	0.963029	1.1879
Q9VHL2	LD47396p	Tcp-1eta	40.99	544	20	37	1.02697	1.00721	1.05859	0.940188	1.01771
Q9VU15	LD47455p	CG10754	6.44	264	2	2	0.990807	0.977169	1.16209	0.997528	0.911263
O96299	LD47736p	Sodh-2	21.67	360	4	9	1.02237	0.849903	1.07736	0.953546	0.921892
Q9W5R5	LD47843p	Slmap	3.9	897	3	3	0.806811	0.986952	0.917928	1.0188	0.926181
Q9VL68	CG4598, isoform A	CG4598	27.76	281	8	16	1.50882	0.984697	1.01554	0.801393	1.37238
Q8T9B6	LDLR chaperone boca	boca	46.67	180	10	16	1.14857	1.05267	0.975675	1.03952	1.09232
Q9VH19	Leishmanolysin-like peptidase	Invadolysin	15.08	683	7	7	0.9479	0.979404	0.846005	1.16808	0.956914
Q9V3Y0	Lethal (2) 35Be	l(2)35Be	16.28	215	3	3	1.06288	0.988549	0.991604	1.22821	0.924147
Q8MKN0	Ubiquinone biosynthesis protein COQ9, mitochondrial	Coq9	12.27	326	3	4	1.40578	1.14686	0.782626	0.871945	1.54278
Q9VNR6	Lethal (3) 04053	l(3)04053	20.51	585	8	9	0.996365	1.00365	1.07648	0.975421	0.974714
P08111	Lethal(2) giant larvae protein	l(2)gl	3.88	1161	3	4	1.03219	0.878786	0.854878	1.03609	1.01058
Q9VGW9	LD25118p	mRpL37	3.92	408	2	2	1.68893	1.10017	0.904112	0.908954	1.53833
O62602	Licorne	lic	20.66	334	7	9	0.814173	0.994341	1.00768	1.10109	0.857614
Q9W482	Lin-52, isoform A	lin-52	28.66	157	4	5	1.07694	1.03208	0.846602	0.953592	1.17156
Q9W0H3	Lipid droplet-associated hydrolase	CG9186	15.31	307	5	5	0.896806	1.00175	0.897778	1.21349	0.899246
Q7KNS3	Lissencephaly-1 homolog	Lis-1	18	411	8	13	1.13799	1.04215	0.989584	0.937798	1.13114
Q95028	L-lactate dehydrogenase	ImpL3	28.92	332	8	10	1.03378	0.919283	1.1498	0.89059	0.9572
Q8MRQ4	LMBR1 domain-containing protein 2 homolog	CG8135	3.89	694	2	2	0.814232	0.932763	0.615704	0.895667	1.1559
Q7JXA2	LOBE	PRAS40	9.96	562	4	5	0.898743	1.02321	0.994945	1.11937	0.909015
Q09101	Locomotion-related protein Hikaru genki	hig	3.86	958	4	4	1.0901	0.97442	0.784062	1.00187	1.15599
Q9W1L1	Mitochondrial ribosomal protein L43	mRpL43	11.46	192	2	2	1.42782	1.03096	0.96997	0.84678	1.35339
Q9VCT4	Klingon	klg	8.81	545	4	5	0.913129	1.08685	0.713492	1.21656	1.03623
P82890	Low molecular weight phosphotyrosine protein phosphatase 1	primo-1	27.74	155	4	12	1.15594	1.03145	1.13413	0.922492	1.06358
Q9VWF0	LP01149p	CG12237	49.02	306	13	20	0.834907	1.04105	0.948442	1.12294	0.905654
Q9VEC2	LP02120p	CG12321-RA	21.05	247	5	5	0.865494	1.04999	1.09761	0.996531	0.914688
Q9W2R3	LP03320p	sktl	2.78	792	2	2	1.00481	0.736391	1.30435	1.03387	0.744666
Q9VLL5	LP03571p	ESTS:172F5T	13.24	778	8	10	0.944915	0.797557	0.989777	0.837043	0.953828
Q9VQI5	LP04564p	CG3098	7.53	425	3	3	0.807406	1.1168	1.04958	1.12826	0.883537
Q9VDL4	LP04613p	CG10877	7.26	441	4	4	1.36835	0.965258	1.10553	0.990834	1.11317
Q9VEV3	LP07287p	CG14894	35.74	263	11	16	0.998463	1.14379	1.00154	1.08439	1.027
Q9VGP4	LP08082p	Ranbp9	2.16	1018	2	2	0.74983	0.932965	1.01268	1.04423	0.818121
Q9VKZ8	LP08774p	Usp14	38.95	475	15	30	0.989075	1.04735	1.08772	0.951641	0.998561
Q9VCW3	LP09464p	Nup133	5.42	1200	6	8	0.818251	0.923412	1.01628	0.984869	0.870333
Q9W0Z5	LP09747p	Atf-2-RB	23.32	536	9	13	0.803393	1.05622	0.784628	1.21616	0.929443
Q9W0M4	LP10861p	CG13887	25	228	4	9	0.838319	1.29215	0.757039	1.46549	0.958576
Q9VMC7	LP11564p	CG9545	15.91	704	2	12	0.858211	1.03374	0.993444	0.936081	0.980525
A1Z877	LP19846p	Ndg	3.48	1350	4	4	1.02185	0.978616	1.21688	0.904027	0.943212
Q9VQL1	LP20978p	SerRS	31.74	501	14	23	1.0789	0.998711	1.00129	0.895428	1.09537
Q9VXA3	LP21163p	RSG7	22.26	647	12	16	0.995367	1.00465	0.838687	1.01135	1.08107
Q7KTP7	LP22840p	CG31919	55.25	181	9	12	1.00129	1.02349	1.02071	0.886825	1.06146
Q9VLX0	Lysine ketoglutarate reductase/saccharopine dehydrogenase, isoform A	LKRSDH	8.08	928	6	7	1.31324	0.989079	1.15812	1.01104	1.06139
Q9VMJ7	Lysine-specific demethylase lid	lid	15.61	1838	23	25	0.906087	1.02316	0.855583	1.0299	1.02321
Q0KHU5	Lysophosphatidylcholine acyltransferase	LPCAT	6	533	3	6	0.803677	0.996557	0.792949	1.00345	1.00213
Q9VVX5	Lysophospholipid acyltransferase 5	nes	3.82	497	2	2	0.809211	1.12978	0.941467	1.19693	0.90675
Q9VKX2	Malate dehydrogenase	Mdh1	50.74	337	18	76	1.11298	0.982045	1.10808	0.961547	1.01227
O02193	Males-absent on the first protein	mof	3.63	827	2	2	0.848309	0.62201	1.14395	0.989322	0.68923
Q9VZD5	Probable 28S ribosomal protein S6, mitochondrial	mRpS6	11.56	147	2	2	1.32589	1.02317	0.97735	0.801162	1.3208
Q9W445	Malignant T-cell-amplified sequence 1 homolog	MCTS1	26.92	182	4	8	1.07664	1.0682	1.01207	0.944719	1.0961
Q7JZB4	Mannose-1-phosphate guanyltransferase beta	CG1129	13.55	369	4	4	1.14439	0.910634	1.19896	0.861072	0.997567
Q9VH77	Mannose-6-phosphate isomerase	CG8417	19.44	396	7	9	1.18363	1.00234	1.32474	0.958427	0.957429
O61444	MAP kinase kinase 4, isoform A	Mkk4	25	424	9	11	0.876964	1.10467	0.930897	1.12845	0.962261
P49071	MAP kinase-activated protein kinase 2	MAPk-Ak2	24.51	359	8	10	0.86019	1.07867	1.01766	1.04422	0.940333
P25822	Maternal protein pumilio	pum	3.39	1533	3	4	0.893664	0.974381	0.933211	1.27971	0.844155
Q9VGA4	MBD-R2	MBD-R2	17.62	1169	17	21	0.908863	1.07568	0.970673	1.01863	0.997609
Q9GYU7	Mediator of RNA polymerase II transcription subunit 10	MED10	16.54	133	2	2	0.961488	1.23244	1.04005	0.873115	1.14675
Q9W0P8	Mediator of RNA polymerase II transcription subunit 14	MED14	3.35	1553	4	4	0.832035	0.946575	0.995738	1.15589	0.826635
Q9W278	Mediator of RNA polymerase II transcription subunit 16	MED16	3.06	818	2	2	0.851248	1.00049	1.02511	0.692877	1.07785
Q9W1X7	Mediator of RNA polymerase II transcription subunit 23	MED23	1.95	1439	3	3	0.740733	0.952481	1.15888	1.04989	0.766588
Q9VDR1	Mediator of RNA polymerase II transcription subunit 25	MED25	1.85	863	2	3	0.881469	1.12872	0.961724	1.15099	0.951471
Q9VNG0	Mediator of RNA polymerase II transcription subunit 27	MED27	8.87	293	2	2	0.984954	0.913474	1.33607	0.985785	0.817634
Q9GYV9	Mediator of RNA polymerase II transcription subunit 7	MED7	6.36	220	2	2	0.765533	1.2444	0.76735	1.01006	1.13082
A8JTM7	Megalin, isoform A	mgl	6.71	4769	28	29	0.879771	0.988925	0.846415	1.3704	0.842964
P55162	Membrane-associated protein Hem	Hem	22.38	1126	24	31	1.0439	0.98414	0.912759	0.9614	1.08211
Q9VM47	Menin 1, isoform A	Mnn1	23.07	763	5	33	0.873293	1.11081	0.820809	1.12179	1.02136
Q0E8J0	MEP-1, isoform A	MEP-1	9.98	1152	9	11	1.04704	0.953444	0.938846	1.10147	0.980477
Q9XZ63	Mesencephalic astrocyte-derived neurotrophic factor homolog	Manf	25.43	173	5	7	1.122	1.12333	0.900672	1.01908	1.16959
Q9VC48	Methionine aminopeptidase 1	CG13630	17.65	374	6	9	1.06798	0.965469	1.00808	0.861861	1.08744
Q9VL89	Methionine aminopeptidase 2	und	13.62	448	6	8	1.08842	0.880149	1.21927	0.867662	0.943283
A1ZBE9	Methionyl-tRNA synthetase	MetRS	29.94	1022	24	35	1.01973	1.01099	0.999767	1.07867	0.97704
Q9V9X4	Methylthioribose-1-phosphate isomerase	CG11334	18.96	364	6	8	1.06102	0.979725	1.13816	1.02069	0.945294
Q7K2V9	Mevalonate kinase	CG16804	4.1	390	2	2	1.03032	0.922326	1.15609	0.871137	0.963212
Q9V9J3	Tyrosine-protein kinase Src42A	Src42A	12.38	517	2	9	0.999477	0.984167	0.858175	1.10498	1.01044
Q8SXQ5	RH03087p	CG14407	25.16	159	4	6	1.57544	1.0213	0.979141	0.709249	1.538
Q9VIH3	Microsomal triacylglycerol transfer protein	Mtp	20.65	886	17	23	1.14635	1.03318	1.36594	1.13509	0.871455
Q9W596	Microtubule-associated protein futsch	futsch	51.17	5495	223	832	1.04382	1.04953	0.871563	1.03281	1.09923
Q9I7K0	Microtubule-associated protein Jupiter	Jupiter	53.37	208	4	13	0.891504	1.1295	0.940672	1.17721	0.954256
Q9W0S5	Midkine and pleiotrophin 1, isoform A	miple1	10.81	185	2	2	1.00938	0.706627	0.899465	1.15596	0.834867
Q5LJT3	MIP01391p	CG40486-RB	30.77	247	6	10	1.11256	0.929341	1.29336	0.894859	0.933131
O46098	Protein bcn92	bcn92	43.48	92	4	7	1.51897	0.796082	1.132	0.760448	1.22331
Q8IN49	MIP05539p	CG31195-RA	2.23	807	2	2	1.05857	0.981316	0.731034	1.01904	1.1656
A1Z6N4	MIP05841p	Tdc2	21.04	637	13	15	1.11978	0.857333	1.29983	0.866962	0.91246
Q9VG26	MIP06012p	CG31345-RA	34.27	213	6	28	1.0895	0.982837	1.05329	0.945567	1.03676
Q9VMR6	MIP06029p	CG12512-RA	26.98	593	13	17	1.10732	0.789853	1.05192	0.820437	1.01326
Q9W4J7	Uncharacterized protein	CG15912	16.67	246	4	5	1.64339	0.939901	1.06394	0.706789	1.45888
Q9VDY8	MIP08680p	vib	55.88	272	2	37	0.85182	0.903133	0.936724	1.08461	0.868215
Q8IQB7	MIP21654p	CG32032-RA	12.94	286	4	4	1.15782	0.87442	1.14378	0.974771	0.959259
E1JHX0	MIP29328p	CG42554-RA	10.33	213	2	3	0.988738	1.16727	0.997315	0.956558	1.10345
Q0KHZ6	CG7834, isoform A	CG7834	59.29	253	15	57	1.39361	0.923013	1.08341	0.865047	1.18896
Q9Y1A3	Mitochondrial import inner membrane translocase subunit Tim8	Tim8	51.14	88	4	7	1.35877	1.04695	0.955158	0.739209	1.41983
Q9W021	39S ribosomal protein L23, mitochondrial	mRpL23	14	150	2	2	1.41967	0.929863	1.07543	0.695479	1.32674
Q9U4L6	Mitochondrial import receptor subunit TOM40 homolog 1	Tom40	21.22	344	4	6	1.14815	1.06894	0.956028	0.911573	1.18713
Q9VXQ0	Mitochondrial ribosomal protein L3	mRpL3	16.3	362	4	4	1.39526	0.82941	1.01885	0.912491	1.15188
Q9VB10	CG5590	CG5590	33.01	412	12	20	1.3773	0.999474	0.916928	1.00053	1.23955
Q9VWH4	Probable isocitrate dehydrogenase [NAD] subunit alpha, mitochondrial	l(1)G0156	57.29	377	20	76	1.47134	1.03659	0.964704	0.815268	1.40897
Q9W086	Mitochondrial ribosomal protein L46	mRpL46	12.02	258	3	3	1.47986	0.921083	0.863258	0.903805	1.35872
Q8MSS7	Mitochondrial ribosomal protein S2	mRpS2	12.88	264	3	4	1.32181	0.983675	1.09997	0.79759	1.21497
Q9VYI6	LD23884p	CG4410	7.11	661	4	4	1.25853	0.971177	0.865184	0.792141	1.34537
Q9VEB1	IP09655p	Mdh2	62.5	336	21	176	1.78137	0.936604	1.06769	0.70779	1.53084
Q7K2N3	GH23975p	MFS9	18.53	502	7	12	0.860971	0.974396	0.818491	1.51381	0.786933
Q9VA81	GEO10172p1	mRpS18C	13.57	140	2	2	1.45415	1.0008	0.999198	0.817799	1.35111
Q8SYP9	Mitochondrial ribosomal protein S5, isoform A	mRpS5	10.81	407	4	5	1.32586	1.07644	0.891274	0.758715	1.45595
Q9VZW1	GH10494p	scramb2	7.98	263	2	3	0.876372	1.14107	0.530392	1.2713	1.11974
Q95RF6	LD34461p	Tom20	21.64	171	2	3	0.964173	1.09799	0.668095	1.03716	1.2093
O61443	Mitogen-activated protein kinase 14B	p38b	17.81	365	4	8	1.19542	1.08803	0.955876	1.07486	1.12445
P40417	Mitogen-activated protein kinase ERK-A	rl	40.16	376	8	27	0.983843	1.00527	0.922526	0.994754	1.03747
Q9VAW1	Moca-cyp, isoform A	Moca-cyp	4.74	970	2	10	1.12846	1.00094	0.868933	0.99906	1.13994
A0A0B4JDA0	Moira, isoform B	mor	27.86	1145	2	49	0.961208	1.4293	0.912566	1.33504	1.06358
P39205	Molybdenum cofactor synthesis protein cinnamon	cin	31.61	601	17	22	1.15216	0.94457	1.11394	0.987456	0.997781
M9MS14	Moody, isoform C	moody	10.27	633	4	5	0.811475	0.983549	0.728597	1.35063	0.863311
Q9VKJ1	MPN domain-containing protein CG4751	CG4751	6.73	1412	8	9	0.948955	1.14658	0.999397	1.14084	0.979116
Q9VNX4	Delta-1-Pyrroline-5-carboxylate dehydrogenase 1, isoform A	P5CDh1	60.28	574	36	262	1.69601	0.945112	1.05808	0.74105	1.46801
Q9VP65	Multifunctional methyltransferase subunit TRM112-like protein	CG12975	21.77	124	2	2	0.977434	1.10169	1.31877	0.950679	0.916134
Q9VV72	Multiple inositol polyphosphate phosphatase 1	Mipp1	13.49	467	5	5	1.02564	0.979351	1.02108	0.882572	1.05323
Q9W369	Mutant tan	t	46.51	387	14	23	1.25209	1.06236	1.22702	0.864873	1.1064
P04197	Myb protein	Myb	4.87	657	3	3	0.852667	1.05481	0.939413	1.13868	0.917902
Q9VUH6	Myopic	mop	6.55	1833	9	9	0.910314	1.11454	1.00536	1.10788	0.958178
Q99323	Myosin heavy chain, non-muscle	zip	36.56	2057	2	108	0.886988	1.02493	0.864532	1.00061	1.02508
P06742	Myosin light chain alkali	Mlc1	21.94	155	3	5	0.986676	1.0135	0.958904	0.722885	1.18932
P18432	Myosin regulatory light chain 2	Mlc2	26.58	222	5	9	0.940429	0.993344	1.13205	0.747137	1.02905
P40423	Myosin regulatory light chain sqh	sqh	51.72	174	8	16	1.04282	1.0386	0.919168	0.980821	1.09549
Q23978	Myosin-IA	Myo31DF	4.06	1011	3	3	1.11058	1.02857	1.36981	0.938973	0.92653
Q9VG74	N-acetylneuraminic acid synthase	NANS	15.86	372	4	6	1.05259	0.974642	1.20495	0.99961	0.919566
Q9W2Y3	NAD(P)H-hydrate epimerase	CG2974	35.22	230	6	7	1.66841	0.920175	1.07073	0.797086	1.38589
Q9VK34	NAD-dependent histone deacetylase Sir2	Sir2	2.79	823	2	2	0.808155	1.0373	1.07888	1.15161	0.827371
Q9I7I7	NAD-dependent protein deacetylase Sirt2	Sirt2	10.99	355	3	3	0.940164	1.16342	0.86288	0.902827	1.19135
Q9W0L6	GH22266p	CG13907	6.13	816	5	8	0.918947	1.0882	0.609432	1.25338	1.07749
Q8SXK2	RE18459p	ArgRS-m	10.94	594	7	8	1.71538	0.989289	1.01083	0.796923	1.49615
A8JQT5	Chondrocyte-derived ezrin-like domain containing protein ortholog, isoform G	Cdep	3.58	4273	10	14	0.837547	0.970097	0.619207	1.44265	0.876707
P23654	Neurotactin	Nrt	12.88	846	8	8	0.939998	1.03345	0.673686	1.15824	1.07725
Q00748	Multidrug resistance protein homolog 65	Mdr65	28.8	1302	33	45	0.934978	1.06954	0.671698	1.14633	1.10258
Q9W4A6	RE56564p	CG11473	20.2	916	3	136	0.957095	1.1366	0.671021	1.13492	1.15934
Q9VBP6	GH21316p	Ssadh	61.89	509	28	108	1.5575	0.995569	1.00445	0.81752	1.40127
A8JNT7	Heat shock protein cognate 20	Hsc20	14.58	240	3	3	1.45218	0.861682	1.10061	0.821152	1.20403
A1Z7S3	Rab32, isoform B	Rab32	20.41	686	5	14	1.3252	1.11206	0.772118	1.23836	1.21227
Q9VM33	Elongation factor G, mitochondrial	ico	10.2	745	7	9	1.56372	0.996171	1.00384	0.810208	1.41115
Q9VH85	GH14967p	CG12950	2.02	939	2	2	1.02498	0.975628	0.837413	1.12354	1.02022
O02649	60 kDa heat shock protein, mitochondrial	Hsp60	57.94	573	22	66	1.47082	1.03539	0.965824	0.895707	1.34632
Q9VXZ8	BcDNA.GH02901	pdgy	36.18	597	16	25	1.4107	0.80287	1.0901	0.703832	1.23392
P32748	Dihydroorotate dehydrogenase (quinone), mitochondrial	Dhod	15.8	405	5	6	1.51113	0.894217	1.00761	0.913907	1.2518
Q8MKL1	UPF0598 protein CG30010	CG30010	15.57	167	2	2	1.60114	0.941173	1.0625	0.713024	1.43186
Q27597	NADPH--cytochrome P450 reductase	Cpr	19.59	679	2	16	0.672195	0.857685	1.1589	1.25131	0.63475
Q9VSJ5	NADPH-dependent diflavin oxidoreductase 1	CG13667	2.92	582	2	2	0.890666	0.82138	1.0376	1.12602	0.791289
Q94518	Nascent polypeptide-associated complex subunit alpha	Nacalpha	23.96	217	4	10	1.0877	0.982826	1.08317	1.01418	0.987211
Q9VWI2	NAT1 ortholog, isoform A	NAA15-16	15.84	890	14	20	1.0245	0.974139	1.0298	0.896397	1.03761
A1Z968	NAT1, isoform D	NAT1	7.46	1488	3	11	0.925688	0.996613	1.21356	0.649817	1.03162
Q9VXB0	NECAP-like protein CG9132	CG9132	48.37	246	2	24	0.994234	1.01095	1.0058	0.942242	1.02933
Q9VJ33	NEDD8	Nedd8	16.67	84	2	4	0.955717	1.10093	1.00398	0.994471	1.02912
Q9V6U8	Nedd8-activating enzyme E1 catalytic subunit	Uba3	13.56	450	6	6	1.11408	0.991319	0.967894	0.916743	1.11714
Q9VTE9	Nedd8-activating enzyme E1 regulatory subunit	APP-BP1	8.4	524	3	4	1.1225	0.991548	1.10954	1.00852	0.998105
Q9VSF3	Nedd8-conjugating enzyme Ubc12	Ubc12	23.76	181	4	6	0.845561	0.999817	1.06242	0.96566	0.909916
Q9W2E3	Negative cofactor 2alpha	NC2alpha	5.57	341	2	2	0.843919	0.988251	1.01189	1.10101	0.867137
Q9Y113	Negative elongation factor B	NELF-B	5.56	594	2	2	0.951334	1.05116	0.774405	0.731098	1.33011
Q24134	Negative elongation factor D	TH1	6.23	578	3	4	0.788738	0.933261	0.85425	1.06022	0.899467
P92204	Negative elongation factor E	Nelf-E	6.79	280	2	2	1.00719	0.915529	1.18181	0.987626	0.886276
P10676	Neither inactivation nor afterpotential protein C	ninaC	37.18	1501	10	107	1.34221	1.11637	0.781443	0.983861	1.39272
Q9U9Q2	Neosin, isoform A	Neos	11.05	371	5	5	0.990308	1.00979	0.948841	1.21842	0.922869
Q8IQQ0	Neural conserved at 73EF, isoform F	Nc73EF	52.61	1017	4	128	1.37918	0.970817	1.03006	0.955651	1.18345
Q8SXF0	Mitochondrial ribosomal protein S9	mRpS9	6.84	395	3	4	1.41412	0.91391	0.995617	0.75127	1.33268
O15943	Neural-cadherin	CadN	12.98	3097	2	40	0.989911	1.02001	0.72783	1.09288	1.10392
P42325	Neurocalcin homolog	Nca	62.63	190	12	30	1.14515	0.913861	1.15915	0.813342	1.04386
Q4V4I9	Neuropeptide CCHamide-1	CCHa1	16.48	182	2	2	0.921348	0.997665	0.845241	1.0339	1.02122
Q9VET0	Neuropeptide F	NPF	19.61	102	2	2	0.806084	1.10051	0.626122	2.34745	0.64118
Q86PD3	RE56416p	CG30022;CG30023	41.58	279	11	14	1.45333	0.978477	1.022	0.788627	1.34308
Q9VA70	Neutral ceramidase	CDase	11.08	704	7	9	0.91213	0.910065	1.05283	1.08752	0.851355
Q03017	NF-kappa-B inhibitor cactus	cact	6.8	500	3	4	0.960075	0.893977	0.925112	1.13293	0.90088
Q7JZR5	CG6796	AsnRS-m	18.26	460	7	8	1.57004	0.936223	1.0161	0.7272	1.43766
Q9U3Z7	NHP2-like protein 1 homolog	hoip	30.71	127	4	7	1.31947	0.961827	1.15522	0.838086	1.14448
Q9NK57	NIF3-like protein 1	anon-35F/36A	32.53	292	8	12	1.37727	1.01314	0.982286	0.905993	1.26592
Q27571	Nitric oxide synthase	Nos	12.16	1349	17	22	0.965366	1.04423	0.952222	0.973442	1.04359
O76464	Nitrilase and fragile histidine triad fusion protein NitFhit	NitFhit	10.87	460	5	6	1.18507	0.83375	1.10859	0.719922	1.10408
A1Z8D0	No child left behind	nclb	6.1	459	3	3	0.953057	0.917696	1.15818	0.926812	0.897246
Q9V8M5	Probable 3-hydroxyisobutyrate dehydrogenase, mitochondrial	CG15093	19.75	324	5	5	1.23459	0.92792	1.36189	1.07768	0.886431
Q9VVK7	NUCB1	NUCB1	16.7	569	10	13	1.01798	1.09463	0.976222	1.10749	1.01387
Q7K4N3	Nuclear cap-binding protein subunit 1	Cbp80	17.25	800	12	16	1.07955	0.92903	1.06305	0.89359	1.02655
Q9V3L6	Nuclear cap-binding protein subunit 2	Cbp20	10.39	154	2	2	1.19417	0.8723	1.20173	0.806573	1.02896
Q9VBX1	Nuclear export mediator factor NEMF homolog	Clbn	1.61	992	2	2	1.01077	0.989341	1.13177	1.06639	0.909902
Q9VVA6	Nuclear migration protein NudC	nudC	26.51	332	9	10	0.83047	1.12712	0.982216	1.13463	0.924766
Q9VKJ3	Nuclear pore complex protein Nup160 homolog	Nup160	6.52	1411	9	10	0.800967	0.917439	1.00783	0.992232	0.859177
Q9W1X4	Nuclear pore complex protein Nup214	Nup214	8.88	1711	13	16	0.904845	1.07566	0.888858	1.18385	0.955515
Q9GYU8	Nuclear pore complex protein Nup88	mbo	18.66	702	9	10	0.924997	1.01262	0.946321	1.05238	0.969438
Q9VBP9	Nuclear protein localization protein 4 homolog	Npl4	17.33	652	9	13	1.05862	0.932111	0.960625	1.02665	1.00174
Q9Y0Y6	Nuclear receptor-binding protein homolog	Madm	16.33	637	7	11	0.993365	0.876117	1.00668	1.01985	0.922506
Q9U1H9	Nuclear RNA export factor 1	sbr	6.25	672	3	3	0.815871	1.05545	0.858057	1.10017	0.95562
Q27415	Nucleoplasmin-like protein	Nlp	34.87	152	6	43	1.12886	1.09806	1.05282	0.947481	1.11329
Q9VE85	Nucleoporin 43kD	Nup43	25.42	358	7	8	0.874388	0.972408	0.990947	1.01048	0.922741
A1YK02	Nucleoporin 75kD	Nup75	14.82	668	9	9	1.01408	0.98612	1.21681	0.974258	0.912886
Q9XZ06	Nucleoporin 93kD-1	Nup93-1	11.79	823	8	9	0.763791	0.921805	0.974275	1.07089	0.824184
Q9VCH5	Nucleoporin 98-96kD, isoform A	Nup98-96	14.29	1960	9	25	0.98963	1.00029	0.999707	1.03284	0.97903
Q9V4W1	Nucleoporin GLE1	GLE1	4.43	677	3	3	0.71676	0.921996	1.09502	0.989482	0.78616
A1Z8P9	Nucleoprotein TPR	Mtor	30.39	2346	71	100	0.990761	1.03402	0.908055	1.00932	1.05601
Q9VBV5	Nucleotide exchange factor SIL1	CG10420	9.56	429	4	4	1.02334	0.982971	0.906277	1.03145	1.03539
Q9VJ30	Numb-associated kinase, isoform A	Nak	10.15	1488	2	17	0.985464	1.22361	1.00865	1.18747	1.00589
X2J946	Numb-associated kinase, isoform E	Nak	21.05	708	2	17	0.830841	0.987376	0.825291	1.05171	0.96868
Q8SWU7	Obg-like ATPase 1	CG1354	32.49	397	12	21	1.05283	1.04543	1.04442	0.981714	1.0356
E1JIJ4	Octopamine beta2 receptor, isoform F	Octbeta2R	5.24	630	2	3	0.944387	1.00858	0.980656	0.991496	0.99027
Q7K084	Odorant-binding protein 44a, isoform A	Obp44a	65.03	143	13	56	1.32473	1.01724	1.53574	0.980057	0.930908
Q9VDC9	O-GlcNAcase	Oga	12.27	1019	9	12	0.90539	0.987429	1.01273	1.01692	0.932585
Q7KJA9	O-glycosyltransferase	sxc	18.6	1059	15	16	1.02837	1.15632	0.943788	0.918738	1.17297
Q9XZ53	Oligosaccharyl transferase 3	OstStt3	4.52	774	3	3	0.861941	1.23697	0.975751	1.45923	0.861983
Q9W335	LD26546p	l(1)G0320	7.62	302	2	2	0.805634	1.25785	0.741477	1.83852	0.7998
A0A0B4LHE6	Orcokinin, isoform B	Orcokinin	22.05	127	2	3	0.846899	1.06172	1.04022	1.36888	0.792254
Q9VCA2	Organic cation transporter protein	Orct	4.01	548	2	3	1.08995	0.958731	0.796908	0.970922	1.15887
Q9VW26	Ornithine aminotransferase, mitochondrial	Oat	31.32	431	12	14	1.14997	0.734255	1.46052	0.958616	0.778883
Q9W198	Over compensating males, isoform A	ocm	1.1	2175	2	3	0.85403	0.951734	1.86928	0.860915	0.661405
Q9V3D2	Oxygen-dependent coproporphyrinogen-III oxidase	Coprox	16.15	390	5	6	1.28417	0.902048	1.1254	0.84959	1.10695
Q9VC05	Oxysterol-binding protein	Osbp	18.37	784	13	17	0.925775	0.986514	1.0062	1.08281	0.915405
A1Z814	Oxysterol-binding protein	CG1513-RA	15.43	784	3	20	0.971941	1.06637	0.905139	1.23951	0.950417
Q868Z9	Papilin	Ppn	2.52	2898	6	7	0.859969	1.01102	1.01428	0.806018	1.02785
P35415	Paramyosin, long form	Prm	11.38	879	5	10	0.888639	0.907896	1.18762	0.943402	0.843041
Q9NB04	Patj homolog	Patj	5.28	871	4	5	0.981811	0.939252	0.948459	1.01853	0.976653
A1Z8S6	Pds5, isoform A	pds5	5.01	1218	5	5	0.845044	0.90844	0.936374	1.0218	0.89547
Q9W1L5	Peptidyl-alpha-hydroxyglycine alpha-amidating lyase 2	Pal2	13.55	406	4	5	1.1235	1.05852	1.12207	0.988961	1.03363
O01404	Peptidylglycine alpha-hydroxylating monooxygenase	Phm	25.48	365	8	14	1.17	0.938423	0.995037	1.00499	1.0542
Q9W0Q2	Peptidyl-prolyl cis-trans isomerase	Cypl	23.86	176	3	4	1.10658	0.947492	1.33427	1.05542	0.859555
Q9VBU4	Peptidyl-prolyl cis-trans isomerase	CG11858	22.31	130	3	3	1.00796	0.96269	1.02274	0.992103	0.978064
P25007	Peptidyl-prolyl cis-trans isomerase	Cyp1	61.23	227	10	159	1.10936	0.929342	1.1208	0.91476	1.00154
Q9W227	Peptidyl-prolyl cis-trans isomerase	CG2852	55.12	205	12	34	1.12005	1.01577	0.992742	0.924258	1.11415
Q8MKJ6	Peptidyl-prolyl cis-trans isomerase	CG11777	14.29	161	2	2	1.16311	0.942834	1.08244	0.79605	1.12108
Q9V3G3	Peptidyl-prolyl cis-trans isomerase E	cyp33	14	300	3	4	0.98742	0.955311	1.08592	1.01274	0.925699
Q8IP97	Peroxin 19, isoform A	Pex19	28.77	292	8	11	1.04459	1.01907	0.937415	0.981285	1.07555
Q9V3P0	Peroxiredoxin 1	Jafrac1	48.97	194	10	71	1.13361	1.07887	1.05943	0.998478	1.07511
P29845	Heat shock 70 kDa protein cognate 5	Hsc70-5	52.33	686	34	64	1.45519	1.00926	0.990825	0.825062	1.35716
Q9VQI7	Peroxiredoxin 6005	Prx6005	48.2	222	10	17	1.12861	0.978639	1.20206	0.971795	0.969357
Q9VXJ0	Peroxisomal multifunctional enzyme type 2	Mfe2	27.09	598	13	13	1.08024	0.892673	1.23077	0.996072	0.885968
Q7KQM6	PERQ amino acid-rich with GYF domain-containing protein CG11148	CG11148	9.34	1574	13	16	0.913355	1.09495	0.97741	1.09059	0.971133
Q9VDQ7	Phagocyte signaling-impaired protein	psidin	2.43	948	3	3	1.00808	0.977297	1.16658	0.99198	0.919773
Q9W3J5	Phenylalanine--tRNA ligase alpha subunit	alpha-PheRS	25.5	498	14	20	1.01745	1.02689	1.0582	0.949648	1.01817
Q9VCA5	Phenylalanine--tRNA ligase beta subunit	beta-PheRS	48.05	589	22	32	1.12253	1.0149	1.12663	0.985322	1.01206
P56079	Phosphatidate cytidylyltransferase, photoreceptor-specific	CdsA	13.2	447	8	17	0.978157	1.33853	0.758524	1.48911	1.03072
Q9W0I6	Phosphatidylinositide phosphatase SAC1	Sac1	20.1	592	10	14	0.808573	1.061	0.787125	1.3091	0.891877
Q9W1M7	Phosphatidylinositol 3-kinase	Pi3K59F	1.79	949	2	2	0.84575	1.1181	0.930318	1.19525	0.923917
Q8SXX1	Phosphatidylinositol 5-phosphate 4-kinase, isoform A	PIP4K	32.43	404	11	21	1.04561	0.987032	1.0149	0.918807	1.05117
Q9VC10	Phosphatidylinositol glycan anchor biosynthesis, class S ortholog	PIG-S	8.21	536	4	5	0.801057	1.06495	0.975898	1.27688	0.828313
Q9VUY9	Phosphoglucomutase	Pgm	45.54	560	23	43	1.04611	0.94431	1.12773	0.962603	0.9522
Q01604	Phosphoglycerate kinase	Pgk	55.42	415	22	138	1.14909	1.00279	1.09189	0.963815	1.04679
Q9VAN7	Phosphoglycerate mutase	Pglym78	63.53	255	13	88	1.11838	1.0324	1.0953	0.953643	1.0497
Q9VPY2	Phospholipase A2 activator protein, isoform A	Plap	10.67	787	8	8	0.828624	0.919334	1.08086	1.12844	0.791182
A1Z7P1	Phosphomannomutase 45A	Pmm45A	23.76	623	12	18	1.12711	0.870672	1.35337	0.740975	0.953894
P35421	Phosphoribosylformylglycinamidine synthase	ade2	8.12	1354	11	12	1.13317	0.96482	1.17404	1.02853	0.952516
Q9W330	Phosphotransferase	Hex-A	42.7	541	2	38	1.05396	1.0971	0.875985	1.00484	1.14368
P19107	Phosrestin-1	Arr2	56.86	401	22	96	1.35214	1.06004	1.10699	1.04624	1.12026
P91634	PI-3 kinase	Pi3K92E	2.39	1088	3	3	0.787195	0.9508	1.00196	1.29406	0.756958
Q9VK58	Pih1D1, isoform D	Pih1D1	5.12	1094	2	2	0.981216	0.879349	0.923103	0.922545	1.00808
Q9VSS1	Pixie, isoform A	pix	11.29	611	7	8	1.2109	0.979468	1.0176	0.955019	1.11039
Q9VXP4	Platelet-activating factor acetylhydrolase IB subunit beta homolog	Paf-AHalpha	30.22	225	6	12	1.22379	1.15542	0.979385	0.994608	1.20528
O76902	Pleckstrin homology domain-containing family F member 1 homolog	rush	9.49	316	2	3	1.15596	0.998598	0.943018	0.924008	1.154
Q9V4A7	Plexin-B	PlexB	1.41	2051	2	2	0.91421	0.969326	0.908103	1.03164	0.971021
O46043	Poly(ADP-ribose) glycohydrolase	Parg	10.65	723	6	8	0.963974	1.01784	1.15066	0.982471	0.929063
Q8T6B9	Poly(U)-binding-splicing factor half pint	pUf68	22.29	637	3	14	0.95943	1.00442	0.97075	1.16206	0.92078
Q9VZ49	Poly(U)-specific endoribonuclease homolog	CG2145	17.4	592	9	14	0.931226	1.04395	0.878578	1.00641	1.04784
P21187	Polyadenylate-binding protein	pAbp	30.91	634	18	36	0.967355	1.02242	0.962023	1.13827	0.947379
Q7KNF2	Polyadenylate-binding protein 2	Pabp2	30.36	224	6	13	1.02256	1.12521	1.00737	0.992682	1.07385
Q9VC36	Polybromo	polybromo	2	1654	3	4	0.731299	1.02775	0.810955	1.04785	0.946334
Q9VHA0	Polycomb protein Scm	Scm	10.6	877	9	10	0.903745	1.0006	0.999398	1.04809	0.930089
Q6WV17	Polypeptide N-acetylgalactosaminyltransferase 5	pgant5	3.81	630	2	2	0.641553	1.02575	0.974893	1.42419	0.694977
Q94981	Potential E3 ubiquitin-protein ligase ariadne-1	ari-1	4.57	503	2	4	1.03205	1.10685	0.954654	1.05667	1.06343
Q9W1W9	PRADC1-like protein	CG9849	14.29	196	2	2	0.959003	0.8446	0.899374	1.15442	0.878179
Q9VGP6	Prefoldin subunit 3	mgr	35.05	194	7	10	1.02605	1.08657	0.998684	1.00132	1.05631
A1Z8U0	Pre-mRNA processing factor 8	Prp8	17.07	2396	38	44	1.07272	1.0265	0.997561	0.934321	1.08662
Q7KRW8	Pre-mRNA-processing factor 39	CG1646	10.23	1066	11	17	0.903203	1.04224	0.977035	1.14833	0.915349
Q9VAQ7	Pre-mRNA-splicing factor Slu7	Slu7	6.1	574	4	4	1.14091	0.998811	0.960458	1.05716	1.06052
Q9V5Q4	Pre-mRNA-splicing factor Syf2	Syf2	13.27	226	3	3	1.00631	0.976607	0.90581	1.06408	1.00661
Q9VP47	Pre-rRNA-processing protein TSR1 homolog	CG7338	3.93	814	3	3	0.902305	0.997761	0.908218	1.29797	0.861244
Q9V9S8	Ferrochelatase, mitochondrial	FeCh	26.3	384	11	17	1.28893	1.02889	0.842336	0.971923	1.27756
O61722	PRL-1 phosphatase, isoform A	PRL-1	34.09	176	5	6	0.996644	1.00337	0.887657	1.0918	1.01038
P25161	Probable 26S proteasome non-ATPase regulatory subunit 3	Rpn3	51.21	494	24	45	1.00043	1.01403	0.999565	1.05425	0.98084
Q9W5W7	CG9581	CG9581	7.34	545	4	5	1.36878	1.03697	0.964351	0.729691	1.42012
Q9VIV6	GH04973p	CG10194	19.94	351	7	9	1.74208	0.964654	1.03664	0.791038	1.48097
Q8I0J3	Mitochondrial ribosomal protein S21, isoform A	mRpS21	19.54	87	2	2	1.19681	0.875361	1.32722	0.684877	1.02986
Q9VA02	Probable 2-oxoglutarate dehydrogenase E1 component DHKTD1 homolog, mitochondrial	CG1544	11.97	919	9	10	1.04017	0.849791	1.21228	1.00907	0.850813
A1Z934	CG8778	CG8778	48.49	299	14	17	1.61393	1.03887	0.962589	0.772811	1.52864
Q9VXX8	Probable 60S ribosomal protein L37-A	RpL37a	20.43	93	2	2	1.10525	0.970174	1.03074	1.05623	0.994467
Q9VZ64	Probable 6-phosphogluconolactonase	CG17333	23.46	243	6	8	1.02758	0.755061	1.05557	0.841765	0.939549
Q9VYH3	Probable alpha-aspartyl dipeptidase	CG2200	30.83	240	5	13	1.13489	0.998888	0.948429	0.800301	1.22019
Q9VXN4	Probable arginine--tRNA ligase, cytoplasmic	Aats-arg	11.73	665	8	11	0.954833	0.999124	1.11004	1.00088	0.925644
Q9VLJ0	Probable cGMP 3',5'-cyclic phosphodiesterase subunit delta	PrBP	12.58	151	2	3	1.24266	0.923757	1.23892	0.813905	1.05533
Q9VYD7	Mitochondrial import inner membrane translocase subunit Tim9	Tim9a	28.42	95	2	4	1.7525	0.96568	1.03554	0.743041	1.52828
Q9V3D6	Probable cleavage and polyadenylation specificity factor subunit 2	Cpsf100	8.6	756	6	6	0.82544	0.756708	0.995664	1.00435	0.791067
P84040	Histone H4	His4	59.22	103	8	29	1.36175	0.822325	0.862081	0.731056	1.37093
Q9V8M2	Probable cytochrome P450 12b2, mitochondrial	Cyp12b2	5.98	535	3	4	1.19348	0.976931	0.992202	0.861935	1.17058
Q9VGZ0	Probable cytochrome P450 12e1, mitochondrial	Cyp12e1	14.94	522	7	9	1.15606	1.05003	0.909901	0.952352	1.18463
Q9V419	Probable cytochrome P450 28a5	Cyp28a5	24.36	505	12	15	0.817775	0.963662	0.855172	1.37518	0.798724
Q9VYT8	Probable cytochrome P450 28c1	Cyp28c1	5.54	505	3	3	0.743742	1.22334	1.1846	1.60576	0.704954
Q9VMT5	Probable cytochrome P450 28d1	Cyp28d1	40.24	502	20	45	0.815265	1.12944	0.960603	1.47513	0.798407
Q9VYQ7	Probable cytochrome P450 311a1	Cyp311a1	6.21	483	2	2	0.823205	0.927099	1.04555	1.16485	0.79185
Q9VMS7	Probable cytochrome P450 4ac3	Cyp4ac3	6.68	509	3	3	0.844466	0.92401	1.05446	0.964574	0.875904
Q9VXY0	Probable cytochrome P450 4s3	Cyp4s3	4.44	495	2	2	0.732581	1.08205	0.740397	1.49498	0.811776
Q9V4U9	Probable cytochrome P450 6a13	Cyp6a13	14.4	493	5	5	0.896584	1.02998	0.935938	1.27507	0.871349
Q9V770	Probable cytochrome P450 6a17	Cyp6a17	12.57	501	6	9	0.725726	1.13528	0.734033	1.2487	0.938605
Q9V773	Probable cytochrome P450 6a20	Cyp6a20	8.38	501	3	3	0.535641	0.937322	0.946936	0.817463	0.834825
Q9VG82	Probable cytochrome P450 9f2	Cyp9f2	32.56	516	17	32	0.862884	1.01663	0.858881	1.2541	0.889507
Q8SYS7	Probable cytosolic Fe-S cluster assembly factor CG17683	CG17683	14.47	477	7	8	0.983042	1.095	0.966656	1.11425	0.998627
Q7K1Y4	Probable cytosolic iron-sulfur protein assembly protein Ciao1	Ciao1	19.1	335	5	5	1.13888	0.8055	1.1251	0.888809	0.965476
Q9VIU7	Probable dolichol-phosphate mannosyltransferase	CG10166	17.01	241	4	4	0.963292	0.967345	0.994122	1.37933	0.81343
O96827	Probable elongation factor 1-beta	Ef1beta	68.02	222	13	42	1.092	1.02024	1.0351	0.98016	1.04812
Q9VL18	Probable elongation factor 1-delta	eEF1delta	53.91	256	15	21	1.09646	1.07669	1.07513	0.948093	1.0741
Q7K4B3	Probable elongator complex protein 2	Elp2	4.41	794	3	3	0.939789	0.978031	0.977309	1.04829	0.946794
Q9VQZ6	Probable elongator complex protein 3	Elp3	10.69	552	5	5	0.922511	0.906031	1.24371	0.927329	0.842244
Q9VMA2	Probable galactose-1-phosphate uridylyltransferase	Galt	10.57	350	4	4	1.34682	0.952101	1.74723	0.954541	0.850895
Q9W1X8	Probable GDP-L-fucose synthase	Gmer	19.63	321	6	7	1.21673	1.05501	1.00146	0.969014	1.15289
Q9VYA0	Probable glutamine-dependent NAD(+) synthetase	CG9940	8.64	787	5	5	0.900432	0.896428	1.01238	1.00024	0.892798
Q9Y105	Probable glutamine--tRNA ligase	Aats-gln	24.04	778	15	18	1.03264	0.934452	1.08188	1.04958	0.922882
Q9W260	GH03113p	wrapper	12	500	7	8	0.900736	1.03608	0.786065	1.2797	0.937575
Q7KVQ0	Probable H/ACA ribonucleoprotein complex subunit 1	CG4038	25.74	237	4	5	1.30623	0.988545	0.825837	0.911074	1.32118
Q9VH48	Probable histone-arginine methyltransferase CARMER	Art4	6.6	530	4	5	1.07086	1.08202	1.1602	0.863975	1.06358
Q9W265	Probable hydroxyacid-oxoacid transhydrogenase, mitochondrial	T3dh	11.85	464	4	4	0.942374	0.8608	1.18442	0.68437	0.96489
Q9VT51	Probable insulin-like peptide 2	Ilp2	43.07	137	3	3	0.968684	1.04533	1.03233	1.06988	0.958048
Q9VXT7	Probable isoaspartyl peptidase/L-asparaginase CG7860	CG7860	20.48	332	4	6	1.02893	0.896843	1.01743	0.971637	0.968179
Q7KW39	Probable methylmalonate-semialdehyde dehydrogenase [acylating], mitochondrial	CG17896	45.19	520	19	50	1.44791	0.948353	1.05446	0.937068	1.20323
Q9VHD3	Probable maleylacetoacetate isomerase 1	GstZ1	8.13	246	2	2	1.36942	1.01686	1.19387	0.875836	1.15296
Q9VHD2	Probable maleylacetoacetate isomerase 2	GstZ2	12.78	227	4	6	0.963544	0.865986	1.03784	0.744794	1.02631
Q8T3L6	Probable malonyl-CoA-acyl carrier protein transacylase, mitochondrial	beg	16.09	379	5	5	1.44291	0.807511	1.10558	0.86646	1.14116
Q9VSA3	Probable medium-chain specific acyl-CoA dehydrogenase, mitochondrial	CG12262	36.28	419	16	43	1.37368	0.889506	1.21803	0.742595	1.15432
Q9V9A7	Probable methylcrotonoyl-CoA carboxylase beta chain, mitochondrial	l(2)04524	16.78	578	8	10	1.35136	0.875771	1.19405	0.823805	1.10371
Q9VY28	Probable 28S ribosomal protein S25, mitochondrial	mRpS25	11.38	167	2	2	1.37838	0.784771	1.03142	0.802365	1.17961
Q9VY93	Probable methylthioribulose-1-phosphate dehydratase	CG11134	34.8	227	7	11	1.11277	0.995386	1.03686	0.919868	1.07739
Q9VCE6	Probable N6-adenosine-methyltransferase MT-A70-like protein	Ime4	6.74	608	3	3	0.834477	0.866448	0.878938	1.05392	0.880005
Q9NHD5	Probable N-acetyltransferase san	san	28.26	184	5	6	1.05388	0.980872	1.0698	1.0195	0.973893
Q9V6B9	Probable nucleoporin Nup54	Nup54	10.16	610	6	6	0.928112	1.04522	0.935331	1.28491	0.888794
Q9VDV3	Probable nucleoporin Nup58	Nup58	14.29	546	7	7	0.887091	0.990817	1.09714	1.09764	0.855624
Q10714	Angiotensin-converting enzyme	Ance	3.74	615	2	2	1.32478	0.997657	0.751332	0.7687	1.52788
O97067	Probable peptidyl-tRNA hydrolase 2	CG1307	17.2	186	3	3	0.688763	0.941447	0.884484	1.17288	0.792379
Q7KML2	Probable peroxisomal acyl-coenzyme A oxidase 1	CG5009	3.44	669	2	2	1.13101	0.964753	1.47147	1.12005	0.808701
Q9VTZ6	Probable phosphomannomutase	CG10688	26.77	254	6	6	1.03876	0.957383	1.29448	0.944415	0.891575
Q9VAN0	Probable phosphoserine aminotransferase	CG11899	29.4	364	9	14	1.19495	0.906052	1.33233	0.951551	0.919927
Q9VTE5	Probable prefoldin subunit 2	l(3)01239	48.95	143	8	12	1.00138	1.08826	1.00971	0.998619	1.04049
Q9VRL3	Probable prefoldin subunit 4	CG10635	28.26	138	5	6	1.15092	1.13742	0.936743	1.0172	1.17114
Q9VCZ8	Probable prefoldin subunit 5	CG7048	36.31	168	5	8	1.00976	1.21865	0.928216	0.990334	1.16151
Q9VW56	Probable prefoldin subunit 6	CG7770	60.8	125	7	18	1.12581	1.05281	1.01225	0.99886	1.08329
Q7K4Q5	Probable protein phosphatase CG10417	CG10417	30.66	662	17	25	1.00286	1.02697	0.978127	0.984133	1.03444
Q94529	Probable pseudouridine-5'-phosphatase	Gs1l	46.32	231	5	15	1.01849	0.982516	1.1627	0.993605	0.927982
Q7K480	Probable RNA methyltransferase bin3	bin3	1.83	1367	2	2	0.967107	0.897697	1.19126	1.03731	0.836772
O18391	Probable serine hydrolase	kraken	8.46	331	2	2	0.932253	0.984195	1.09074	0.982346	0.92444
Q9VXE0	Probable small nuclear ribonucleoprotein G	SNRPG	47.37	76	5	8	1.09015	0.79526	1.18839	0.904135	0.901023
Q9VI10	Probable small nuclear ribonucleoprotein Sm D2	SmD2	54.62	119	6	9	0.996375	1.028	1.01078	1.00364	1.00494
Q9VN12	Probable sodium/potassium/calcium exchanger CG1090	CG1090	9.32	633	4	8	0.941039	1.02362	0.870635	1.43659	0.851523
Q9VWP4	Probable sulfite oxidase, mitochondrial	CG7280	15.18	573	7	7	1.2414	0.959589	1.01885	0.93632	1.12573
Q95TN1	Probable trafficking protein particle complex subunit 13 homolog	CG4953	3.42	438	2	2	0.903996	0.999369	1.00063	0.961907	0.969848
Q9V6U9	Probable trans-2-enoyl-CoA reductase, mitochondrial	CG16935	57.42	357	18	40	1.69062	0.905853	1.10393	0.699855	1.43946
Q9W1G0	Probable transaldolase	Taldo	28.7	331	11	17	1.10286	0.959686	1.19963	0.951175	0.958966
Q9VV41	Probable tRNA N6-adenosine threonylcarbamoyltransferase	CG4933	21.33	347	6	6	1.06	0.884335	1.0745	0.82005	1.02628
Q9VQM4	Probable tyrosyl-DNA phosphodiesterase	gkt	6.38	580	3	3	1.07231	0.872197	1.36755	0.879871	0.865219
Q9V4Q8	Probable U2 small nuclear ribonucleoprotein A'	U2A	21.13	265	5	5	0.97457	0.994091	1.03994	1.00594	0.962254
Q9VUR0	Probable Ufm1-specific protease 2	UFSP2	2.97	607	2	2	0.937528	1.07641	0.992702	0.956774	1.03306
Q9VTH0	Procollagen lysyl hydroxylase, isoform A	Plod	4.44	721	3	3	1.2509	0.971487	1.02935	0.949299	1.12319
Q26377	Pro-corazonin	Crz	51.3	154	6	10	0.85964	0.802945	1.0929	0.989375	0.798448
Q9VLV9	Proctolin	Proc	17.14	140	2	4	1.04853	0.990279	0.874123	1.00982	1.0822
P25843	Profilin	chic	78.57	126	7	16	1.22987	0.806022	1.22497	0.855576	0.978538
Q9VIT0	Proliferating cell nuclear antigen	pcna2	14.12	255	4	6	0.990496	0.977689	1.02641	0.9716	0.985072
Q9VA69	Prolyl 4-hydroxylase alpha-related protein PH4[alpha]EFB	PH4alphaEFB	4.55	550	2	2	1.05866	0.930411	0.925555	1.35224	0.873245
Q9V637	Proteasome inhibitor PI31 subunit	PI31	13.33	270	3	4	0.817578	0.975547	0.956532	1.12721	0.860531
P12881	Proteasome subunit alpha type-1	Prosalpha6	71.68	279	17	36	1.16532	1.03673	1.06121	1.00674	1.06485
P40301	Proteasome subunit alpha type-2	Prosalpha2	32.05	234	7	9	1.10739	0.984241	1.0018	0.868081	1.11859
Q9V5C6	Proteasome subunit alpha type-3	Prosalpha7	35.97	253	9	20	1.29502	0.999613	1.09157	0.995742	1.09933
P18053	Proteasome subunit alpha type-4	Prosalpha3	32.95	264	7	16	1.23199	1.06534	1.05167	0.959824	1.1421
Q95083	Proteasome subunit alpha type-5	Prosalpha5	37.3	244	8	24	1.24467	1.00783	1.18148	0.904583	1.07979
Q9XZJ4	Proteasome subunit alpha type-6	Prosalpha1	49.18	244	12	26	1.19755	0.968933	1.18642	0.94281	1.0175
P22769	Proteasome subunit alpha type-7-1	Prosalpha4	50.6	249	9	15	1.16315	0.98657	1.04784	0.869518	1.12119
Q9VUJ1	Proteasome subunit beta type	Prosbeta2	25	272	4	13	1.1769	0.929594	1.4879	0.85004	0.901005
A0AQH0	Proteasome subunit beta type	Prosbeta1	24.55	224	4	6	1.28922	0.84949	1.67757	0.556161	0.957459
Q7K148	Proteasome subunit beta type	Prosbeta5	22.7	282	7	9	1.21946	0.969728	1.24684	0.901905	1.01882
Q9VJJ0	Proteasome subunit beta type	Prosbeta4	45.77	201	8	17	1.12396	1.0273	1.19326	0.854575	1.05051
P40304	Proteasome subunit beta type-1	Prosbeta6	38.72	235	6	15	1.06469	0.991741	1.1404	0.887703	1.01397
Q9XYN7	Proteasome subunit beta type-3	Prosbeta3	38.54	205	7	9	1.54589	0.95744	1.37997	0.893966	1.10088
Q9VNA5	Proteasome subunit beta type-4	Prosbeta7	36.19	268	9	18	1.26265	0.953185	1.24369	0.865004	1.05081
Q9V677	Proteasome-associated protein ECM29 homolog	CG8858	6.51	1890	11	12	0.774338	0.989153	1.01097	0.963438	0.893176
Q8MSV2	Protein alan shepard	shep	12.03	590	7	10	1.05286	1.03001	0.970868	1.05324	1.02903
Q9U6Y9	Protein arginine N-methyltransferase 5	csul	4.26	610	2	2	0.999716	0.949202	0.96027	1.1029	0.944625
Q9VUQ5	Protein argonaute-2	AGO2	21.75	1214	5	14	1.06184	0.967763	0.823415	1.07688	1.06804
Q9VEN9	Protein associated with topo II related-1, isoform A	Patr-1	7.33	968	6	6	0.818036	0.895431	1.03213	1.07964	0.811389
Q9VEX5	Protein asunder	Asun	3.05	689	2	2	0.820795	1.01315	1.00429	1.17414	0.841865
P29746	Protein bangles and beads	bnb	57.24	442	20	42	0.910635	0.784498	1.04236	0.903491	0.87115
Q9VFR0	Protein BCCIP homolog	CG9286	6.4	297	2	2	0.952759	0.970055	1.03799	1.09133	0.903019
Q961D9	Protein BCL9 homolog	lgs	3.68	1469	5	6	0.840441	1.04428	0.959027	1.15345	0.892186
Q9VKF0	Cyclin Y, isoform A	CycY	20.44	406	7	8	0.904251	1.10589	0.739145	1.23384	1.01883
Q9U4G1	Protein borderless	bdl	19.05	719	13	18	0.98928	1.01408	0.764022	1.27444	0.98278
Q9VIL0	Protein brunelleschi	bru	11.06	1320	14	15	0.88791	1.00968	0.959394	0.990411	0.973221
Q24523	Protein bunched, class 2/F/G isoform	bun	14.88	1331	2	21	0.861422	1.03979	0.966149	1.10519	0.917867
Q8MMC4	Protein CDV3 homolog	CG3760	42.8	271	2	17	1.24697	0.962023	1.05552	0.964987	1.09329
P17886	Protein crooked neck	crn	4.84	702	3	3	0.970499	0.992263	1.31242	1.10966	0.81036
Q9V3B6	Protein CWC15 homolog	c12.1	26.64	259	5	6	1.09419	0.943816	0.803831	1.06074	1.09302
P54399	Protein disulfide-isomerase	Pdi	63.51	496	31	99	1.03414	1.08519	0.979489	1.13608	1.00178
Q3YMU0	Protein disulfide-isomerase (Fragment)	ERp60	44.38	489	19	78	1.10455	1.04528	0.986747	1.01343	1.07482
Q9V438	Protein disulfide-isomerase A6 homolog	CaBP1	18.01	433	7	11	1.01357	1.10223	1.03905	0.999258	1.03802
Q9VKQ9	Protein dpy-30 homolog	Dpy-30L1	50	134	4	4	1.22904	1.07178	1.07044	0.815772	1.21981
Q9VJQ5	Protein Dr1	NC2beta	11.48	183	2	3	0.996209	0.811146	1.03373	0.935638	0.917735
Q9W032	Protein ecdysoneless	ecd	6.14	684	3	3	0.99365	1.09051	0.855425	0.903778	1.18472
P16914	Protein elav	elav	34.99	483	11	29	1.02824	1.08396	0.895131	0.992754	1.11882
Q08012	Protein enhancer of sevenless 2B	drk	28.91	211	5	7	0.980715	0.796779	1.12969	0.947314	0.855798
A0A1F4	Protein eyes shut	eys	9.01	2176	19	27	1.52806	1.06317	1.13634	0.857041	1.29991
Q9VAY7	Protein FAM50 homolog	CG12259	4.46	359	2	3	0.769029	0.9761	0.879606	1.26504	0.813714
Q24020	Protein flightless-1	fliI	9.71	1256	11	11	1.0167	0.94933	0.943665	1.04203	0.990098
Q9VWA8	Protein FRG1 homolog	FRG1	9.16	262	3	3	0.902095	1.03215	0.976258	1.05095	0.954146
Q8SY33	Protein Gawky	gw	6.29	1384	6	8	0.956167	1.09677	0.954361	1.12661	0.986531
Q9VBG6	Protein HGH1 homolog	CG6073	18.97	369	6	7	0.895944	1.02703	0.996645	1.00337	0.961483
Q24185	Protein hook	hook	11.93	679	8	9	0.815504	1.04742	0.993468	1.15314	0.867847
Q9VG55	Protein hugin	Hug	14.66	191	2	3	0.969037	1.03195	0.681392	1.0324	1.16758
Q9VMX1	Protein KBP homolog	CG14043	23	600	14	18	0.84414	1.04068	1.03739	0.971312	0.938327
P13677	Protein kinase C, eye isozyme	inaC	24.57	700	14	20	1.40386	1.05007	0.962764	1.03868	1.22608
Q9VNE2	Protein krasavietz	kra	19.91	422	9	11	0.92684	1.11525	1.04337	1.225	0.900247
Q961R9	CG6126	CG6126	10.09	555	5	7	0.920935	1.08585	0.705253	1.12879	1.09419
Q8MSS1	Protein lava lamp	lva	16.19	2779	39	42	0.951249	0.981617	1.01873	1.06034	0.929677
Q9W328	Protein LST8 homolog	Lst8	16.29	313	4	5	0.976901	1.0013	1.40617	0.973548	0.831275
P49028	Protein mago nashi	mago	19.05	147	2	2	1.08011	1.03567	0.874516	1.0484	1.10029
Q9W2F2	Protein mahjong	mahj	3.17	1544	4	4	0.992519	0.99592	1.0717	1.0041	0.957916
O01939	Protein misato	mst	11.67	574	6	6	0.9915	0.965345	0.969705	1.00857	0.989166
P91891	Protein Mo25	Mo25	27.73	339	10	16	0.837204	0.895367	1.04314	1.07668	0.81732
Q9VLT1	Protein MON2 homolog	mon2	1.43	1684	2	3	0.50642	1.01165	1.01399	1.00751	0.750963
Q9I7K6	Protein NASP homolog	CG8223	19.51	492	7	8	0.79561	0.976874	1.15228	1.04102	0.808134
Q9VXK0	Protein NipSnap	Nipsnap	7.33	273	2	3	1.14962	0.770659	1.02034	0.726317	1.09941
Q9VQ62	Protein NPC2 homolog	Npc2a	52.7	148	7	11	1.35632	0.750021	1.11843	0.841401	1.07476
Q7K2Y9	Protein N-terminal glutamine amidohydrolase	tun	16.1	205	3	3	1.19187	0.906972	1.57551	0.842837	0.867881
P16554	Protein numb	numb	18.88	556	9	11	0.828455	1.05265	0.715926	1.0888	1.04232
P40797	Protein peanut	pnut	36.55	539	21	32	1.0024	1.04552	0.765688	0.997605	1.16142
Q95R98	Protein phosphatase methylesterase 1	CG5068	18.09	409	7	11	1.05086	0.951602	1.11867	0.85565	1.01426
P36872	Protein phosphatase PP2A 55 kDa regulatory subunit	tws	18.24	499	8	10	0.993769	0.95789	0.961961	1.00627	0.99158
A8Y4V5	FI20903p1	CG40498-RF	12.31	268	3	5	0.786466	1.03746	0.781764	1.5256	0.790481
Q9VLT5	Protein purity of essence	poe	8.53	5322	43	52	0.765061	0.967884	0.959778	1.1058	0.838962
P14199	Protein ref(2)P	ref(2)P	6.34	599	2	2	0.821336	0.984361	1.01589	1.06856	0.866272
Q86BY9	Protein rigor mortis	rig	2.43	1235	3	4	1.0824	1.02217	0.915019	1.05447	1.06859
Q9VVE2	Protein rogdi	rogdi	26.12	268	7	11	0.811559	0.970475	1.17879	0.81485	0.893858
Q07327	Protein ROP	Rop	51.42	597	32	175	0.975005	1.02564	0.860708	1.10011	1.02031
Q9XZL8	Protein sarah	sra	44.18	292	9	12	1.01479	0.92175	1.01257	0.937825	0.992897
Q7JXF7	Protein seele	sel	41.8	189	6	10	1.18057	0.973296	1.02744	1.14318	0.992282
P53997	Protein SET	Set	8.92	269	2	3	1.20203	1.19601	1.00736	0.99269	1.19899
P13368	Protein sevenless	sev	1.53	2554	4	4	0.93219	1.05962	0.848964	1.37027	0.897523
Q24524	Protein singed	sn	22.85	512	10	14	1.36542	0.993563	1.29508	0.788725	1.13206
Q24179	Protein sly1 homolog	Slh	16.12	639	8	8	0.892702	1.02752	0.74522	1.21079	0.981706
P26675	Protein son of sevenless	Sos	5.89	1596	8	9	0.776397	1.08895	0.885701	1.15873	0.912404
Q9VN45	Protein spartin	spartin	10.67	553	5	5	0.859092	0.793192	1.10094	0.908317	0.822337
Q24211	Protein stoned-A	stnA	44.82	850	36	70	1.01063	1.02884	0.837337	0.991701	1.11505
A8JUV0	Protein strawberry notch	sno	5.99	1653	9	10	0.885199	1.07755	0.886464	1.1608	0.958719
P25991	Protein suppressor of forked	su(f)	12.55	765	8	8	0.738466	0.987536	1.01262	1.06372	0.831271
Q9VZS3	Protein translation factor SUI1 homolog	CG17737	34.55	110	4	7	1.19692	0.978062	1.29085	0.973595	0.960493
P22812	Protein Tube	tub	3.9	462	2	2	1.04084	0.9121	0.935948	1.00499	1.00619
A0A0S0X7W8	Protein tweety homolog	CG3638	4	1224	3	5	0.739378	0.988831	1.0118	1.03548	0.844147
Q9VAL5	Protein tyrosine phosphatase 99A, isoform F	Ptp99A	7.16	1397	3	11	1.10867	0.989642	0.968077	1.17796	0.977759
Q9W2F3	Protein tyrosine phosphatase ERK	PTP-ER	1.67	1377	2	2	0.845953	1.12816	0.8864	1.14205	0.97321
P20153	Protein ultraspiracle	usp	10.04	508	6	8	0.960916	0.956951	1.04067	1.07005	0.90863
P10379	Protein unzipped	uzip	26.64	488	13	17	0.973731	1.02698	0.695823	1.08394	1.12414
Q9V3C1	Protein Vhl	Vhl	8.99	178	2	3	1.02383	0.786488	1.04548	0.838168	0.961068
Q9V3J8	Protein will die slowly	wds	14.96	361	5	8	0.958463	0.896317	1.04334	0.911735	0.948702
Q9VJ28	FI05204p	CG10639-RA	23.96	455	9	11	1.456	0.923194	1.00667	0.947324	1.2176
Q9W517	Protein wings apart-like	wapl	1.49	1741	2	2	0.804963	1.03244	0.912355	1.22243	0.860694
Q9VQJ8	Protein-lysine N-methyltransferase CG9643	CG9643	9.59	219	2	3	1.13544	0.842864	1.03367	0.748998	1.10974
O76454	Pterin-4-alpha-carbinolamine dehydratase	Pcd	33.85	192	4	13	1.22722	0.996786	0.975934	1.00323	1.12371
P39736	Puff-specific protein Bx42	Bx42	13.35	547	5	5	0.980201	1.06104	0.940582	1.02638	1.03777
Q9VZ58	Purple acid phosphatase	CG1637	5.33	450	2	3	1.18204	0.983599	1.09137	0.789612	1.15133
O96838	Putative 1-phosphatidylinositol 3-phosphate 5-kinase	fab1	0.94	1809	2	2	0.857208	0.952013	0.90432	1.06631	0.918094
Q9VTJ4	Putative alpha-L-fucosidase	Fuca	11.74	494	7	8	0.910344	0.781128	0.95195	0.661313	1.04848
Q7KN94	Walrus, isoform A	wal	37.27	330	12	31	1.41458	0.902752	1.08343	0.769125	1.25089
P23128	Putative ATP-dependent RNA helicase me31b	me31B	38.56	459	14	21	1.053	0.94967	1.56386	0.946374	0.797802
Q9VN93	Putative cysteine proteinase CG12163	CG12163	11.07	614	6	8	1.16617	1.05033	0.899437	0.965426	1.18856
Q9VDY1	Putative DNA helicase Ino80	Ino80	3.05	1638	4	4	0.744375	1.18296	1.00009	0.999906	0.963665
Q9VMQ7	Putative elongator complex protein 4	CG6907	9.84	437	4	6	1.02453	0.930387	0.982154	1.0089	0.981852
Q8T4E1	Putative GPI-anchor transamidase	CG4406	6.76	355	2	2	0.882428	1.08731	0.898124	1.00453	1.03526
P36951	Putative hydroxypyruvate isomerase	Gip	37.12	264	9	13	1.157	0.872471	1.06673	0.803006	1.08543
Q8MR45	Putative N(4)-(beta-N-acetylglucosaminyl)-L-asparaginase CG1827	CG1827	5.09	393	2	4	1.17946	0.754437	0.987847	0.849795	1.05238
P54353	Putative peptidyl-prolyl cis-trans isomerase dodo	dod	65.66	166	10	22	1.13954	0.983358	0.938527	1.01757	1.08527
O76206	Putative riboflavin kinase	anon-84Ea	15.03	153	2	2	1.04239	1.12001	0.961763	1.03976	1.08038
Q9VEW2	Putative SERF-like protein	CG17931	45	60	4	4	0.808633	0.988686	0.961855	1.18481	0.83726
P83097	Putative tyrosine-protein kinase Wsck	Wsck	6.32	791	4	4	0.894158	0.896895	0.875996	1.1551	0.881817
Q9VUV9	Putative U5 small nuclear ribonucleoprotein 200 kDa helicase	l(3)72Ab	17.18	2142	34	43	1.00881	0.991268	1.03021	0.907854	1.032
Q9VSL3	Pyrimidodiazepine synthase	se	12.35	243	2	4	1.78762	1.11865	1.07865	0.927085	1.44898
Q9V3F8	Pyrroline-5-carboxylate reductase	P5cr	34.64	280	7	12	1.24654	0.948916	1.16206	0.788937	1.1253
O62619	Pyruvate kinase	PyK	78.05	533	37	328	1.13119	0.913917	1.18976	0.98528	0.940265
O44434	QKR58E-3	qkr58E-3	22.08	317	4	13	0.931467	1.07933	0.990999	1.11155	0.956362
Q9W254	Quaking related 58E-2, isoform A	qkr58E-2	18.75	416	8	11	0.939125	1.01082	0.916478	1.15345	0.942037
Q9VPY8	Queuine tRNA-ribosyltransferase catalytic subunit	Tgt	10.54	427	3	3	1.00719	0.909914	1.09871	0.963085	0.929822
Q9V8W3	Rab proteins geranylgeranyltransferase component A	Rep	19.57	511	7	8	1.05261	0.813359	1.15884	0.950021	0.884821
M9NGF2	Rab3 GDP-GTP exchange factor, isoform D	Rab3-GEF	23.33	2130	2	59	0.901699	1.2348	0.664112	1.18069	1.15812
Q9VQ26	Rab3 GTPase-activating protein catalytic subunit	CG31935	5.9	916	4	4	0.8815	0.924018	1.03992	1.02881	0.872766
Q9VKB9	Rab3 GTPase-activating protein regulatory subunit	Rab3-GAP	2.98	1341	3	3	0.800148	0.888425	0.985859	1.17212	0.782479
Q9VAV2	FI21480p1	CG12413-RA	21.84	696	13	13	1.64121	1.10532	0.893164	0.904712	1.52766
Q7KY04	Rab4 protein	Rab4	34.74	213	4	9	0.905885	0.944633	1.01306	1.14391	0.857924
Q9W0H9	Rabaptin-5-associated exchange factor for Rab5 ortholog	Rabex-5	10.49	696	6	6	0.814145	1.04491	0.934602	1.14272	0.894929
Q9W425	Rabconnectin-3A	Rbcn-3A	21.37	3426	63	100	0.902025	0.982496	1.01054	1.06528	0.907843
Q9W543	Rabconnectin-3B, isoform A	Rbcn-3B	21.7	1525	30	45	0.806052	0.936624	0.967822	1.03325	0.870872
Q9VC31	RabX4	RabX4	34.27	213	5	15	0.937548	0.909425	1.07193	0.999164	0.891788
A1ZBJ6	Rad, Gem/Kir family member 1, isoform B	Rgk1	2.25	1379	2	3	0.923506	0.94847	0.997965	1.07991	0.90091
Q9W2E7	Rae1	Rae1	40.75	346	10	12	0.967994	1.02822	0.972557	1.11495	0.956263
P11346	Raf homolog serine/threonine-protein kinase phl	phl	11.37	739	8	11	0.956781	1.0358	0.920456	1.18164	0.947903
Q9W437	Raptor, isoform B	raptor	6.72	1621	10	11	0.819329	0.898954	0.994768	1.00526	0.859129
P48148	Ras-like GTP-binding protein Rho1	Rho1	39.06	192	8	19	0.967889	1.10651	0.797563	1.027	1.13693
P08646	Ras-like protein 1	Ras85D	46.56	189	8	12	1.00183	0.895123	0.844111	0.998177	1.02967
P04388	Ras-like protein 2	Ras64B	19.27	192	3	4	0.986935	1.01324	0.766735	0.942376	1.1703
P08645	Ras-like protein 3	R	46.74	184	8	11	1.10019	0.959553	0.881884	0.937775	1.13194
P25228	Ras-related protein Rab-3	Rab3	59.09	220	9	38	0.945501	0.900732	1.14372	0.892392	0.906742
O18334	Ras-related protein Rab6	Rab6	31.25	208	9	20	0.875572	1.17943	0.992845	1.02201	1.01992
P40792	Ras-related protein Rac1	Rac1	27.6	192	2	9	1.11332	0.926089	0.640392	1.07981	1.18556
Q9W4B6	RE01432p	CG12730	11.49	148	2	2	0.917226	0.880278	0.856978	1.19268	0.876978
Q9VZ71	RE01453p	CG15211	12.99	177	3	4	1.0209	0.883054	1.07287	0.997634	0.919563
Q9VUH8	RE01471p	Tdrd3	10.77	836	7	8	0.872851	0.98546	1.01475	1.15542	0.856297
[truncated: 399 more rows]
