# Supplementary material for: Spermidine supplementation and protein restriction protect from organismal and brain aging independently
Source: Aging (Albany NY). 2025 Jun 7;17(6):1429–51. doi: 10.18632/aging.206267 (PMC12245200; doi:10.18632/aging.206267)
Supplement: Supplementary Table 2 [file aging-17-206267-s003.xlsx]

## Sheet: Table S2
Supplementary Table 2. Label-free quantification proteomic profiles of 10-day-old wild type whole Drosophila in 2% yeast, 12% yeast, 2% yeast + Spd, 12% yeast + Spd rearing.
UniProt											Abundance Ratio					Abundance Ratio Adj. P-Value					Abundances (Grouped) CV [%] (pc=percent%)
Accession	Protein	Coverage [%]	# PSMs	# Unique Peptides	# AAs	Biological Process	Cellular Component	Molecular Function	Reactome Pathways	Gene Symbol	(12% + Spd) / (12%)	(12%) / (2%)	(12% +Spd) / (2%)	(2% +Spd) / (2%)	(12% +Spd) / (2% +Spd)	(12% +Spd) / (12%)	(12%) / (2%)	(12% +Spd) / (2%)	(2% +Spd) / (2%)	(12% +Spd) / (2% +Spd)	12%	12% +Spd	2%	2% +Spd
Q9V496	Apolipophorins	61	9176	225	3351	cell-cell signaling;transport;signal transduction;other biological processes	non-structural extracellular;other cell component	signal transduction activity or receptor binding;transporter activity;cytoskeletal activity;other molecular function		apolpp	0.887	1.374	1.219	0.89	1.369	0.707526	0.991669	0.996701	0.640286	0.992006	5.48	5.88	2.7	12.54
M9MRD1	Muscle-specific protein 300 kDa, isoform D	24	2055	181	12345	cell organization and biogenesis;transport;developmental processes;other biological processes	other membranes;cytosol;cytoskeleton;nucleus;other cell component	cytoskeletal activity;other molecular function		Msp300	0.983	0.906	0.891	1.024	0.87	0.998656	0.991669	0.994562	0.994447	0.992006	6.56	12.36	6.92	4.18
P13395	Spectrin alpha chain	67	2920	162	2415	cell-cell signaling;cell cycle OR cell proliferation;cell organization and biogenesis;developmental processes;other biological processes	plasma membrane;other membranes;cytoskeleton;ER/Golgi;other cell component	cytoskeletal activity;other molecular function	Neutrophil degranulation; RHOU GTPase cycle; RHOV GTPase cycle; Interaction between L1 and Ankyrins; COPI-mediated anterograde transport; Caspase-mediated cleavage of cytoskeletal proteins	alpha-Spec	1.008	0.843	0.85	0.984	0.864	0.999628	0.991669	0.994562	0.994447	0.992006	6.8	9.52	5.64	2.72
Q9VQL7	3-oxoacyl-[acyl-carrier-protein] reductase	64	6907	145	2438	other metabolic processes;other biological processes		other molecular function		FASN1	0.875	1.049	0.918	1.107	0.829	0.6399	0.99616	0.994562	0.858561	0.992006	16.29	8.83	12.97	7.95
A8DYP0	Obscurin	40	2762	138	4218	cell organization and biogenesis;protein metabolism;other metabolic processes;other biological processes	cytoskeleton	enzyme regulator activity;cytoskeletal activity;kinase activity;other molecular function		Unc-89	1.01	0.725	0.732	0.958	0.764	0.999628	0.945683	0.994562	0.946912	0.992006	8.39	8.15	9.2	5.57
A8JNJ6	Karst, isoform E	34	1314	115	4337	cell organization and biogenesis;transport;other biological processes	plasma membrane;other membranes;cytoskeleton;other cell component	enzyme regulator activity;cytoskeletal activity;other molecular function	Interaction between L1 and Ankyrins; COPI-mediated anterograde transport	kst	0.965	1.047	1.01	0.83	1.216	0.998656	0.99616	0.996106	0.20194	0.992006	8.28	10.67	20.16	30.81
M9PEC8	Dynein heavy chain 64C, isoform G	31	1542	111	4648	other biological processes	cytoskeleton;other cell component	cytoskeletal activity;other molecular function		Dhc64C	1.007	1.378	1.387	1.056	1.314	0.998656	0.991669	0.994562	0.97686	0.992006	12.49	8.7	18.12	11.85
A1Z784	Acetyl-CoA carboxylase	51	2532	104	2482	other metabolic processes;other biological processes	mitochondrion;other cell component	other molecular function	Carnitine metabolism; Biotin transport and metabolism; ChREBP activates metabolic gene expression; Fatty acyl-CoA biosynthesis	ACC	0.936	1.131	1.058	1.027	1.03	0.954286	0.999685	0.996106	0.994447	0.99345	14.23	5.57	7.65	6.23
A1ZA73	Stretchin-Mlck, isoform R	60	6783	101	1918	cell organization and biogenesis;protein metabolism;other metabolic processes		cytoskeletal activity;kinase activity		Strn-Mlck	1.018	0.733	0.747	1.012	0.738	0.999628	0.946966	0.994562	0.999871	0.992006	8.1	11.06	5.32	7.24
Q00174	Laminin subunit alpha	33	1449	90	3712	cell adhesion;cell organization and biogenesis;other metabolic processes;stress response;developmental processes;other biological processes	non-structural extracellular;extracellular matrix;plasma membrane;other membranes;ER/Golgi;other cell component	signal transduction activity or receptor binding		LanA	0.936	0.849	0.795	0.944	0.842	0.954286	0.991669	0.994562	0.931101	0.992006	9.28	5.38	6.24	4.89
Q9VVA4	GH26789p	51	1743	85	2114	other metabolic processes		other molecular function		GS	0.986	1.33	1.312	1.018	1.289	0.998656	0.991669	0.994562	0.995836	0.992006	7.21	8.51	3.51	5.6
A0A0B4LGB7	Calcium-transporting ATPase	62	9171	80	999	transport	other membranes;cytosol;ER/Golgi	transporter activity;other molecular function		SERCA	0.822	0.899	0.738	0.985	0.75	0.320452	0.991669	0.994562	0.994447	0.992006	11.27	13.5	9.73	14
Q7PLB8	3-oxoacyl-[acyl-carrier-protein] reductase	43	1580	78	2394	other metabolic processes		other molecular function		FASN3	0.885	1.293	1.144	1.024	1.118	0.698713	0.991669	0.999991	0.994447	0.999838	17.16	5.99	6.81	6.3
A4UZZ4	Alpha-1,4 glucan phosphorylase	77	5704	77	844	other metabolic processes		other molecular function		GlyP	0.994	0.99	0.984	1.052	0.935	0.998656	0.991669	0.994562	0.985962	0.992006	4.06	7.42	3.64	6.1
Q868Z9	Papilin	36	1281	73	2898	cell organization and biogenesis;other biological processes	non-structural extracellular;extracellular matrix	enzyme regulator activity;extracellular structural activity;other molecular function	O-glycosylation of TSR domain-containing proteins	Ppn	1.058	0.741	0.783	0.94	0.834	0.998656	0.953225	0.994562	0.931101	0.992006	10.73	12.06	14.52	5.07
Q9VIE8	Aconitate hydratase, mitochondrial	70	5172	71	787	other metabolic processes	cytosol;mitochondrion	other molecular function	Citric acid cycle (TCA cycle)	mAcon1	0.945	0.788	0.744	0.986	0.755	0.983502	0.982739	0.994562	0.994447	0.992006	7.27	11.33	6.53	5.75
Q9W596	Microtubule-associated protein futsch	25	813	71	5495	cell organization and biogenesis;transport;developmental processes;other biological processes	cytosol;cytoskeleton;other cell component	cytoskeletal activity;other molecular function		futsch	0.969	0.703	0.681	0.979	0.695	0.998656	0.932889	0.994562	0.992936	0.992006	11.88	11.81	15.96	9.92
Q9VSL8	Rhea, isoform B	37	972	70	2836	cell adhesion;cell organization and biogenesis;developmental processes;other biological processes	cytoskeleton;other cell component	signal transduction activity or receptor binding;cytoskeletal activity	MAP2K and MAPK activation; Platelet degranulation ; Smooth Muscle Contraction; SEMA3A-Plexin repulsion signaling by inhibiting Integrin adhesion; Integrin signaling; p130Cas linkage to MAPK signaling for integrins; GRB2:SOS provides linkage to MAPK signaling for Integrins	rhea	1.075	0.887	0.954	0.985	0.968	0.998656	0.991669	0.994562	0.994447	0.992006	8.46	7.18	7.44	7.43
X2JC31	Clathrin heavy chain	45	1645	67	1678	transport	plasma membrane;other membranes;ER/Golgi	other molecular function		Chc	1.039	1.214	1.262	1.032	1.223	0.998656	0.993922	0.996106	0.994447	0.992006	13.43	12.27	14.28	7.45
P35381	ATP synthase subunit alpha, mitochondrial	70	7658	67	552	other metabolic processes;transport;other biological processes	other membranes;mitochondrion	transporter activity;other molecular function	Formation of ATP by chemiosmotic coupling; Cristae formation	blw	0.989	0.812	0.803	1.04	0.772	0.998656	0.988593	0.994562	0.994447	0.992006	7.84	8.79	6.17	4.74
A4V1N8	FI03688p	85	5425	66	879		cytoskeleton	other molecular function		Prm	2.711	0.308	0.834	0.853	0.978	2.0025e-15	0.0697851	0.994562	0.340507	0.992006	70.18	52.85	62.19	50.29
P13060	Eukaryotic translation elongation factor 2	71	4960	62	844	protein metabolism;other metabolic processes	cytosol;other cell component	translation activity;nucleic acid binding activity;other molecular function	Neutrophil degranulation; Protein methylation; Peptide chain elongation; Synthesis of diphthamide-EEF2	eEF2	0.978	1.782	1.743	1.021	1.706	0.998656	0.932025	0.994562	0.994447	0.992006	5.06	5.29	19.63	11.74
Q9VMD9	Tiggrin	34	812	62	2188	cell adhesion;cell organization and biogenesis;developmental processes;other biological processes	non-structural extracellular;extracellular matrix	signal transduction activity or receptor binding		Tig	1.018	0.985	1.003	0.89	1.127	0.999628	0.991669	0.996106	0.633579	0.999391	5.45	20.2	4.3	17.56
M9PBL3	HSP 82	65	4225	61	717	other biological processes	other cell component	other molecular function		Hsp83	1.18	1.62	1.911	1.093	1.748	0.627719	0.974363	0.994562	0.921635	0.992006	23	13.74	30.46	21.1
Q9W2H8	4-alpha-glucanotransferase	46	1385	56	1629	other metabolic processes	other cell component	other molecular function	Neutrophil degranulation; Glycogen breakdown (glycogenolysis)	BEST:GH22856	0.993	0.864	0.858	1.094	0.784	0.998656	0.991669	0.994562	0.918197	0.992006	3.77	12.5	9.3	6.09
Q9W0S7	Staphylococcal nuclease domain-containing protein 1	60	1389	56	926	RNA metabolism OR transcription;other metabolic processes;other biological processes	nucleus;other cell component	nucleic acid binding activity;other molecular function		Tudor-SN	0.907	1.003	0.91	1.02	0.892	0.831081	0.991669	0.994562	0.994447	0.992006	9.12	6.6	8.14	5.03
P15215	Laminin subunit gamma-1	46	992	56	1639	cell adhesion;cell organization and biogenesis;developmental processes;other biological processes	non-structural extracellular;extracellular matrix			LanB2	1.083	0.62	0.672	0.922	0.729	0.998656	0.844219	0.994562	0.837333	0.992006	20.6	11.52	10.76	14.1
Q8MLU9	Uncharacterized protein	31	417	55	2979					Dmel\CG13492	1.083	0.688	0.745	1.07	0.696	0.998656	0.809239	0.994562	0.976694	0.992006	34.37	15.67	25.42	23.02
Q7PLL6	Lethal (3) 80Fj, isoform A	25	656	52	2630	cell organization and biogenesis				l(3)80Fj	1.049	1.619	1.698	1.043	1.627	0.998656	0.974363	0.994562	0.994447	0.992006	14.84	10.18	10.94	7.25
Q7KN97	Pyruvate carboxylase	55	2467	52	1181	other metabolic processes	other cell component	other molecular function		PCB	1.015	1.23	1.249	1.075	1.161	0.999628	0.991669	0.996106	0.939467	0.995261	9.27	5.6	4.69	4.58
Q7KTG2	Apolipoprotein lipid transfer particle	16	497	51	4333	transport;other biological processes	non-structural extracellular;plasma membrane;other membranes;other cell component	signal transduction activity or receptor binding;transporter activity		Apoltp	0.969	1.197	1.159	1.095	1.059	0.998656	0.997109	0.997675	0.933682	0.992006	19.45	7.71	7.32	8.2
O62619	Pyruvate kinase	84	4910	51	533	other metabolic processes;other biological processes	cytosol;other cell component	kinase activity;other molecular function	Neutrophil degranulation; Glycolysis	PyK	0.949	1.224	1.161	0.982	1.181	0.984445	0.991669	0.9983	0.994447	0.993518	6.31	6.59	3.94	3.87
Q26365	ADP,ATP carrier protein	94	7986	50	312	cell-cell signaling;cell organization and biogenesis;stress response;transport;developmental processes;other biological processes	other membranes;mitochondrion;other cell component	transporter activity	Transport of nucleosides and free purine and pyrimidine bases across the plasma membrane; Mitochondrial protein import	sesB	0.804	1	0.804	0.98	0.821	0.233836	0.991669	0.994562	0.992936	0.992006	22.85	19.12	17.92	17.71
A0A0B4KHN1	Cheerio, isoform O	46	1611	50	2577	cell organization and biogenesis	other cell component	cytoskeletal activity		cher	1.215	0.662	0.805	0.945	0.852	0.471279	0.888938	0.994562	0.931101	0.992006	29.63	23.98	23.16	26.63
Q8MSW0	Isoleucyl-tRNA synthetase	51	866	50	1229	protein metabolism;RNA metabolism OR transcription;other metabolic processes	other cell component	nucleic acid binding activity;other molecular function		IleRS	1.145	1.403	1.606	0.997	1.611	0.792073	0.991669	0.994562	0.994447	0.992006	17.18	13.9	21.18	16.05
Q9VJ86	Bicoid stability factor	46	700	50	1412	RNA metabolism OR transcription;other metabolic processes;other biological processes	cytoskeleton;mitochondrion;nucleus;other cell component	nucleic acid binding activity	Cytoprotection by HMOX1; TP53 Regulates Metabolic Genes; Respiratory electron transport	bsf	1.023	1.119	1.145	1.117	1.025	0.999039	0.999685	0.999991	0.819422	0.992762	5.27	11.03	14.24	16.81
P54399	Protein disulfide-isomerase	79	2369	50	496		non-structural extracellular;ER/Golgi;nucleus;other cell component	other molecular function	Regulation of Insulin-like Growth Factor (IGF) transport and uptake by Insulin-like Growth Factor Binding Proteins (IGFBPs); Post-translational protein phosphorylation; Hedgehog ligand biogenesis; Collagen biosynthesis and modifying enzymes; Insulin processing; LDL remodeling	Pdi	1.019	1.252	1.276	1.029	1.24	0.999628	0.991669	0.996106	0.994447	0.992006	11.86	6.22	8.83	5.22
A8DZ29	Eukaryotic translation initiation factor 4G1, isoform B	32	772	49	1919	protein metabolism;other metabolic processes;other biological processes	translational apparatus	nucleic acid binding activity;other molecular function	Nonsense Mediated Decay (NMD) enhanced by the Exon Junction Complex (EJC); AUF1 (hnRNP D0) binds and destabilizes mRNA; Deadenylation of mRNA; ISG15 antiviral mechanism; L13a-mediated translational silencing of Ceruloplasmin expression; Translation initiation complex formation; Ribosomal scanning and start codon recognition; mTORC1-mediated signalling; Nonsense Mediated Decay (NMD) independent of…	eIF4G1	1.019	1.623	1.654	0.972	1.7	0.999628	0.973991	0.994562	0.980943	0.992006	8.17	11.43	25.96	23.28
Q9Y119	BcDNA.GH08860	66	2393	49	809	other metabolic processes;stress response	other cell component	other molecular function		Tps1	0.883	0.592	0.523	0.931	0.561	0.687131	0.809239	0.951763	0.887493	0.968262	16.97	10.03	15.73	10.43
A8JNP2	Arginine kinase	77	6186	49	375	other metabolic processes		kinase activity;other molecular function		Argk1	0.877	0.972	0.852	0.997	0.855	0.649058	0.991669	0.994562	0.994447	0.992006	17.13	11.05	6.65	8
P28668	Bifunctional glutamate/proline--tRNA ligase	35	700	49	1714	protein metabolism;RNA metabolism OR transcription;other metabolic processes	other cell component	nucleic acid binding activity;other molecular function		GluProRS	1.003	1.504	1.508	1.095	1.377	0.998656	0.991669	0.994562	0.913054	0.992006	13.81	12.82	19.89	9.24
X2JEX8	Yolk protein 3, isoform B	89	5658	48	420		non-structural extracellular	other molecular function		Yp3	1.447	1.23	1.78	1.088	1.636	0.0169251	0.991669	0.994562	0.931101	0.992006	35.03	35.03	32.9	24.81
Q8T0L3	Ubiquitin-activating enzyme E1	52	919	48	1191	protein metabolism;other metabolic processes;stress response;developmental processes;other biological processes	nucleus;other cell component	other molecular function	Antigen processing: Ubiquitination & Proteasome degradation; Synthesis of active ubiquitin: roles of E1 and E2 enzymes	Uba1	1.595	0.907	1.446	0.95	1.523	0.000826475	0.991669	0.994562	0.936959	0.992006	42.34	22.98	33.08	21.18
Q7KN75	Dodeca-satellite-binding protein 1, isoform A	42	883	48	1301	cell cycle OR cell proliferation;cell organization and biogenesis;other biological processes	nucleus;other cell component	nucleic acid binding activity		Dp1	1.017	1.586	1.612	0.982	1.641	0.999628	0.982739	0.994562	0.994447	0.992006	10.57	7.29	11.58	9.16
A0A0B4K700	Mini spindles, isoform D	28	447	47	2082	cell cycle OR cell proliferation;cell organization and biogenesis	other cell component	cytoskeletal activity;other molecular function		msps	1.165	0.769	0.896	1.029	0.87	0.696414	0.973991	0.994562	0.994447	0.992006	21.58	21.54	13.6	11.97
A0A0B4LGC0	Tripeptidyl-peptidase 2	41	877	46	1354	protein metabolism		other molecular function		TppII	1.221	1.051	1.283	1.036	1.239	0.444549	0.99616	0.996106	0.994447	0.992006	20.89	15.23	22.12	20.89
Q9VQL6	3-oxoacyl-[acyl-carrier-protein] reductase	29	710	46	2409	other metabolic processes;developmental processes;other biological processes		other molecular function		FASN2	0.87	1.308	1.138	0.869	1.309	0.605946	0.991669	0.999991	0.464914	0.992006	18.07	2.56	5.16	9.09
Q9VLT5	Protein purity of essence	12	371	46	5322	protein metabolism;other metabolic processes;developmental processes;other biological processes	cytosol;cytoskeleton;nucleus;other cell component	other molecular function	Neutrophil degranulation; Antigen processing: Ubiquitination & Proteasome degradation	poe	1.295	1.177	1.524	0.907	1.681	0.50503	0.999685	0.994562	0.855536	0.992006	24.19	20.92	26.14	25.6
A0A0B4K7J2	E3 SUMO-protein ligase RanBP2	27	771	46	2718	cell organization and biogenesis;protein metabolism;RNA metabolism OR transcription;other metabolic processes;transport;signal transduction;other biological processes	other membranes;nucleus;other cell component	other molecular function	Transport of the SLBP independent Mature mRNA; Transport of the SLBP Dependant Mature mRNA; Transport of Mature mRNA Derived from an Intronless Transcript; Transport of Mature mRNA derived from an Intron-Containing Transcript; Nuclear Pore Complex (NPC) Disassembly; Regulation of HSF1-mediated heat shock response; SUMOylation of SUMOylation proteins; SUMOylation of chromatin organization proteins…	Nup358	1.536	1.233	1.894	1.135	1.668	0.00294661	0.991669	0.994562	0.728255	0.992006	35.92	25.85	29.6	22.89
Q9VEG6	Chorion peroxidase	72	813	46	809	cell organization and biogenesis;other metabolic processes;stress response;other biological processes	non-structural extracellular	other molecular function		Pxt	2.403	1.284	3.086	1.21	2.549	3.06892e-13	0.991669	0.763042	0.304406	0.822385	67.52	36.63	61.93	44.17
Q7K569	Glycerol-3-phosphate dehydrogenase	61	4413	46	724	other metabolic processes;other biological processes	other membranes;mitochondrion;other cell component	other molecular function	Synthesis of PA; Triglyceride catabolism	Gpo1	0.996	0.803	0.8	1.073	0.745	0.998656	0.988593	0.994562	0.939976	0.992006	10.55	11.88	8.23	7.18
A1Z8U0	Pre-mRNA processing factor 8	21	355	45	2396	cell organization and biogenesis;RNA metabolism OR transcription;other metabolic processes;other biological processes	nucleus;other cell component	nucleic acid binding activity	mRNA Splicing - Major Pathway; mRNA Splicing - Minor Pathway	Prp8	0.927	2.024	1.876	1.056	1.777	0.92988	0.841831	0.994562	0.97686	0.992006	7.21	13.12	18.46	23.37
Q9VKW5	Post-proline cleaving enzyme	59	832	45	756	protein metabolism	cytosol	other molecular function		Dmel\CG5355	0.959	1.5	1.439	0.957	1.505	0.998656	0.991669	0.994562	0.940794	0.992006	18.45	14.67	16.66	18.35
Q9VIT9	Thioester-containing protein 4, isoform A	41	663	44	1496	other biological processes	non-structural extracellular	enzyme regulator activity		Tep4	0.926	0.945	0.875	1.003	0.872	0.928279	0.991669	0.994562	0.994447	0.992006	7.36	8.46	5.02	9.96
X2JFG0	Aspartate carbamoyltransferase	26	442	44	2224	other metabolic processes		other molecular function		r	1.075	1.319	1.418	0.973	1.457	0.998656	0.991669	0.994562	0.982807	0.992006	6.4	20.12	20.2	19.27
P98163	Putative vitellogenin receptor	32	711	43	1984	transport;other biological processes	plasma membrane;other membranes;other cell component	other molecular function	VLDLR internalisation and degradation; Transport of RCbl within the body	yl	2.052	1.277	2.62	1.013	2.586	8.31105e-09	0.991669	0.932579	0.999871	0.79353	48.5	35.81	58.32	42.05
P29844	Endoplasmic reticulum chaperone BiP	66	2119	43	656	protein metabolism;other metabolic processes;stress response;signal transduction;other biological processes	non-structural extracellular;other membranes;ER/Golgi;nucleus;other cell component	other molecular function	Regulation of HSF1-mediated heat shock response	Hsc70-3	1.087	1.739	1.89	1.149	1.645	0.984445	0.939341	0.994562	0.656552	0.992006	15.66	13.31	26.63	20.78
P11147	Heat shock 70 kDa protein cognate 4	69	4298	43	651	cell-cell signaling;cell organization and biogenesis;RNA metabolism OR transcription;other metabolic processes;stress response;transport;developmental processes;other biological processes	plasma membrane;other membranes;cytosol;nucleus;other cell component	other molecular function	mRNA Splicing - Major Pathway; Neutrophil degranulation; GABA synthesis, release, reuptake and degradation; Regulation of HSF1-mediated heat shock response; Clathrin-mediated endocytosis; AUF1 (hnRNP D0) binds and destabilizes mRNA; HSP90 chaperone cycle for steroid hormone receptors (SHR) in the presence of ligand; HSF1-dependent transactivation	Hsc70-4	1.271	1.336	1.698	1.029	1.651	0.265887	0.991669	0.994562	0.994447	0.992006	25.02	18.41	26.67	20.7
Q9VUC1	Hsc70Cb, isoform A	69	1324	43	804	other biological processes		other molecular function		Hsp110	1.052	1.239	1.303	0.945	1.379	0.998656	0.991669	0.996106	0.931101	0.992006	10.17	12.09	12.58	9.18
O02649	Heat shock protein 60A	65	2091	43	573	cell organization and biogenesis;stress response;transport;other biological processes	other membranes;mitochondrion	other molecular function		Hsp60A	0.94	1.841	1.73	1.069	1.619	0.969028	0.909462	0.994562	0.953181	0.992006	3.18	12.73	17.11	11.15
X2JB25	Yolk protein 2, isoform B	78	6735	43	442		non-structural extracellular	other molecular function		Yp2	1.346	1.711	2.302	1.194	1.928	0.101172	0.94643	0.964289	0.386959	0.992006	38.02	27.72	42.29	28.45
Q9VHN7	LP07963p	76	2816	43	626			other molecular function	Pentose phosphate pathway; Insulin effects increased synthesis of Xylulose-5-Phosphate	anon-WO0118547.344	1.005	1.432	1.439	1.102	1.306	0.998656	0.991669	0.994562	0.884974	0.992006	10.07	13.89	8.95	7.52
A0A0B4KHG5	Chaoptin, isoform C	42	803	41	1305	other biological processes				chp	0.852	0.665	0.566	0.638	0.887	0.495009	0.890018	0.964289	3.87392e-06	0.992006	8.77	17.01	6.95	7.63
Q9V397	Enoyl-CoA hydratase	61	1608	41	783	other metabolic processes;stress response;other biological processes	mitochondrion;other cytoplasmic organelle	other molecular function	Beta oxidation of palmitoyl-CoA to myristoyl-CoA; Beta oxidation of lauroyl-CoA to decanoyl-CoA-CoA; Beta oxidation of decanoyl-CoA to octanoyl-CoA-CoA; Beta oxidation of octanoyl-CoA to hexanoyl-CoA; Beta oxidation of hexanoyl-CoA to butanoyl-CoA; Acyl chain remodeling of CL; Beta oxidation of myristoyl-CoA to lauroyl-CoA	Mtpalpha	0.987	1.083	1.069	1.01	1.058	0.998656	0.999685	0.996701	0.999436	0.993518	3.67	4.62	6.22	5.74
Q7KMM4	BcDNA.GH04962	53	557	41	924	protein metabolism;other metabolic processes		other molecular function		GCS2alpha	1.079	1.467	1.583	1.173	1.35	0.998656	0.991669	0.994562	0.586846	0.992006	21.2	16.59	18.05	11.03
Q9W0B8	Coatomer subunit alpha	37	515	40	1234	cell cycle OR cell proliferation;cell organization and biogenesis;transport;other biological processes	other membranes;ER/Golgi	other molecular function	COPI-dependent Golgi-to-ER retrograde traffic; COPI-mediated anterograde transport	alphaCOP	1.023	1.36	1.391	0.962	1.446	0.999039	0.991669	0.994562	0.959992	0.992006	8.25	5.38	9.6	4.11
Q9VSW2	UTP--glucose-1-phosphate uridylyltransferase	77	2340	40	513	other metabolic processes;stress response	other cell component	other molecular function		UGP	0.907	1.121	1.016	0.961	1.057	0.832784	0.999685	0.996106	0.957957	0.993518	10.38	5.46	6.12	6.14
A1Z713	Vacuolar protein sorting-associated protein 13	16	386	40	3321	protein metabolism;other metabolic processes;transport;other biological processes	other membranes;other cytoplasmic organelle			Vps13	0.74	1.068	0.79	1.137	0.695	0.0455728	0.999442	0.994562	0.718041	0.992006	25.37	27.74	31	30.04
A0A0B4KGN2	MICOS complex subunit MIC60	51	973	40	746		other membranes;mitochondrion			Mitofilin	0.826	1.02	0.842	1.066	0.79	0.340974	0.991669	0.994562	0.959992	0.992006	14.18	18.09	6.4	7.27
P02843	Vitellogenin-1	59	7862	39	439	other metabolic processes;other biological processes	non-structural extracellular		Digestion of dietary lipid	Yp1	1.364	1.307	1.783	1.187	1.502	0.0764125	0.991669	0.994562	0.421566	0.992006	34.41	29.35	39.63	28.71
E1JHR5	2-phospho-D-glycerate hydro-lyase	80	5534	39	433	other metabolic processes	cytosol	other molecular function		Eno	1.038	0.951	0.987	1.113	0.887	0.998656	0.991669	0.994562	0.835779	0.992006	7.78	7.92	3.48	4.61
Q9VQR8	Leucyl-tRNA synthetase	45	516	39	1182	protein metabolism;RNA metabolism OR transcription;other metabolic processes	other cell component	other molecular function		LeuRS	1.478	1.271	1.878	1.14	1.648	0.0160232	0.991669	0.994562	0.758567	0.992006	21.57	18.11	25.4	16.82
Q9VF51	Aldehyde oxidase 3, isoform A	48	656	39	1254	other metabolic processes	other cytoplasmic organelle	other molecular function		AOX3	1.139	0.946	1.077	0.983	1.096	0.823669	0.991669	0.996701	0.994447	0.999391	9.26	11.65	12.94	6.64
Q9VLZ0	Thioester-containing protein 2, isoform G	43	406	39	1409		non-structural extracellular	enzyme regulator activity		Tep2	1.01	1.152	1.163	1.244	0.935	0.998656	0.999685	0.997675	0.324305	0.992006	12.81	4.2	7.96	14.75
E1JGY6	Lethal (2) 01289, isoform F	42	1002	39	1786		other membranes			hlk	1.067	0.69	0.736	1.012	0.727	0.998656	0.915095	0.994562	0.999871	0.992006	15.73	14.21	12.25	8.47
Q3YMU0	Protein disulfide-isomerase (Fragment)	71	1151	39	489	stress response;other biological processes	ER/Golgi	other molecular function	Calnexin/calreticulin cycle	ERp60	1.017	1.407	1.43	1.03	1.389	0.999628	0.991669	0.994562	0.994447	0.992006	13.45	9.08	20.94	11.43
Q9VLM8	Alanine--tRNA ligase, cytoplasmic	52	799	39	966	protein metabolism;RNA metabolism OR transcription;other metabolic processes	mitochondrion;other cell component	nucleic acid binding activity;other molecular function		AlaRS	0.961	1.613	1.55	1.073	1.444	0.998656	0.976218	0.994562	0.939976	0.992006	20.03	15.76	17.99	10.9
P11046	Laminin subunit beta-1	32	531	38	1788	cell adhesion;cell organization and biogenesis;developmental processes;other biological processes	non-structural extracellular;extracellular matrix;other cell component		Netrin-1 signaling	LanB1	1.046	0.818	0.855	0.964	0.887	0.998656	0.988593	0.994562	0.963131	0.992006	1.42	11.02	11.47	9.66
Q9VC18	5-aminoimidazole-4-carboxamide ribonucleotide formyltransferase	62	748	38	590	other metabolic processes	cytosol	other molecular function	Purine ribonucleoside monophosphate biosynthesis	BEST:GH11240	1.065	1.448	1.542	1.252	1.231	0.998656	0.991669	0.994562	0.14353	0.992006	6.9	10.52	26.61	17.37
A0A0B4KG35	Stretchin-Mlck, isoform U	15	1017	38	8255	cell organization and biogenesis;protein metabolism;other metabolic processes;other biological processes	other cell component	cytoskeletal activity;kinase activity;other molecular function		Strn-Mlck	1.25	0.93	1.163	1.065	1.092	0.331965	0.991669	0.9983	0.962749	0.999391	15.03	25.6	11.27	17.06
P35421	Phosphoribosylformylglycinamidine synthase	38	532	38	1354	other metabolic processes	other cell component	other molecular function	Purine ribonucleoside monophosphate biosynthesis	Pfas	1.133	1.29	1.462	1.066	1.371	0.883314	0.991669	0.994562	0.957957	0.992006	15.49	15.88	20.7	19.95
A1Z992	1,4-alpha-glucan branching enzyme	70	1270	37	685	other metabolic processes;other biological processes	other cell component	other molecular function	Glycogen synthesis	AGBE	0.93	0.794	0.738	1.073	0.688	0.938629	0.987099	0.994562	0.939976	0.992006	9.71	11.68	14.45	8.73
Q9V3P6	26S proteasome non-ATPase regulatory subunit 1	40	604	37	1020	protein metabolism;other metabolic processes;other biological processes	cytosol;nucleus;other cell component	enzyme regulator activity;other molecular function	Neutrophil degranulation; Orc1 removal from chromatin; AUF1 (hnRNP D0) binds and destabilizes mRNA; Regulation of PTEN stability and activity; KEAP1-NFE2L2 pathway; Oxygen-dependent proline hydroxylation of Hypoxia-inducible Factor Alpha; Antigen processing: Ubiquitination & Proteasome degradation; Neddylation; Regulation of RAS by GAPs; ABC-family proteins mediated transport; Degradation of beta…	Rpn2	1.427	1.18	1.683	0.999	1.685	0.0248243	0.997109	0.994562	0.994447	0.992006	39.33	26.86	22.86	26.64
Q7K2W6	GH04080p	61	760	37	690	other metabolic processes;stress response		other molecular function		PPO1	1.014	0.721	0.732	0.95	0.77	0.999628	0.943317	0.994562	0.936959	0.992006	11.78	11.37	8.1	10.64
P23128	ATP-dependent RNA helicase me31b	72	1411	37	459	cell organization and biogenesis;RNA metabolism OR transcription;other metabolic processes;developmental processes;other biological processes	ER/Golgi;other cell component	nucleic acid binding activity;other molecular function	mRNA decay by 5' to 3' exoribonuclease	me31B	1.685	1.3	2.191	0.929	2.359	0.000106752	0.991669	0.994562	0.875472	0.929839	34.39	29.25	33.53	23.68
Q9VHR8	Dipeptidyl peptidase 3	50	978	37	786	protein metabolism	plasma membrane;other membranes;cytosol;other cell component	other molecular function		DppIII	1.104	1.312	1.449	1.006	1.44	0.949954	0.991669	0.994562	0.994941	0.992006	6.94	13.35	12.59	6.84
Q94511	NADH-ubiquinone oxidoreductase 75 kDa subunit, mitochondrial	56	1699	37	731	other metabolic processes;transport	other membranes;mitochondrion	transporter activity;other molecular function	Complex I biogenesis	ND-75	0.975	0.859	0.837	0.949	0.882	0.998656	0.991669	0.994562	0.933682	0.992006	6.29	4.92	9.07	7.71
Q9VN44	FI07923p	43	811	36	1105	transport	cytosol;nucleus;other cell component	other molecular function		Karybeta3	1.1	1.338	1.473	0.932	1.58	0.954286	0.991669	0.994562	0.89623	0.992006	16.72	8.18	22.26	11.25
Q9VFC8	Glycogen [starch] synthase	61	1046	36	709	other metabolic processes;stress response;other biological processes	other cytoplasmic organelle;other cell component	other molecular function	Glycogen synthesis	GlyS	0.945	0.979	0.925	0.976	0.948	0.983502	0.991669	0.994562	0.988285	0.992006	4.16	5.43	7.16	7.29
Q9V677	Proteasome-associated protein ECM29 homolog	25	313	36	1890	cell organization and biogenesis;protein metabolism;other metabolic processes;stress response	nucleus;other cell component	other molecular function			1.255	1.665	2.09	1.005	2.08	0.642923	0.942085	0.994562	0.994941	0.992006	33.06	18.79	22.91	24.69
P08928	Lamin Dm0	52	487	36	622	cell cycle OR cell proliferation;cell organization and biogenesis;transport;developmental processes;other biological processes	other membranes;cytoskeleton;nucleus;other cell component	signal transduction activity or receptor binding;cytoskeletal activity;other molecular function	RHOD GTPase cycle; RHOF GTPase cycle; Breakdown of the nuclear lamina; Depolymerisation of the Nuclear Lamina	Lam	1.088	0.891	0.97	0.962	1.009	0.983502	0.991669	0.994562	0.95942	0.992006	25.54	16.48	16.16	16.08
P29845	Heat shock 70 kDa protein cognate 5	51	986	36	686	cell organization and biogenesis;other metabolic processes;stress response;transport;other biological processes	other membranes;mitochondrion;other cell component	transporter activity;enzyme regulator activity;other molecular function	Regulation of HSF1-mediated heat shock response	Hsc70-5	1.081	1.063	1.149	0.962	1.195	0.998656	0.997109	0.999991	0.961246	0.993518	4.23	6.52	14.83	7.1
Q9VZU7	Ubiquitin carboxyl-terminal hydrolase	49	521	36	827	cell organization and biogenesis;protein metabolism;other metabolic processes;developmental processes;other biological processes	cytosol	other molecular function	Ub-specific processing proteases; Regulation of PTEN stability and activity; Synthesis of active ubiquitin: roles of E1 and E2 enzymes	Usp5	1.49	1.313	1.957	1.121	1.746	0.0129958	0.991669	0.994562	0.853427	0.992006	35.14	23.27	20.13	22.4
Q9W392	CCT-beta	76	1168	36	535	other biological processes	cytosol	other molecular function	Neutrophil degranulation; RHOBTB2 GTPase cycle; RHOBTB1 GTPase cycle; Cooperation of PDCL (PhLP1) and TRiC/CCT in G-protein beta folding; Association of TriC/CCT with target proteins during biosynthesis	CCT2	1.261	1.914	2.415	1.122	2.152	0.297252	0.888938	0.955797	0.800567	0.992006	26.75	25.27	30.27	22.42
M9NEZ5	Neuroglian, isoform G	38	517	35	1309	other biological processes	other membranes			Nrg	1.086	0.767	0.833	0.971	0.857	0.983502	0.973991	0.994562	0.977224	0.992006	4.53	5.25	7.33	6.36
A1Z843	Uncharacterized protein	40	414	35	1199		other membranes;ER/Golgi	other molecular function		Dmel\CG1371	0.917	1.442	1.322	1.108	1.193	0.910329	0.991669	0.996106	0.927844	0.999203	25.31	9.87	18.15	23.37
A0A0B4LGF5	Dynamin-like 120 kDa protein, form S1	35	436	35	969	cell organization and biogenesis;developmental processes;other biological processes	other membranes;cytoskeleton;mitochondrion;other cell component	cytoskeletal activity;other molecular function		Opa1	1.116	0.898	1.003	0.895	1.121	0.948212	0.991669	0.994562	0.68744	0.999838	10.84	10.49	3.92	6.98
A1ZBE9	Methionine--tRNA ligase, cytoplasmic	50	443	35	1022	protein metabolism;RNA metabolism OR transcription;other metabolic processes	cytosol;other cell component	other molecular function		MetRS	0.99	1.064	1.053	1.025	1.027	0.998656	0.997109	0.996106	0.994447	0.992762	12.63	4.49	14.07	9.66
Q23978	Unconventional myosin ID	41	449	35	1011	cell organization and biogenesis;transport;developmental processes;other biological processes	plasma membrane;other membranes;cytoskeleton;other cell component	cytoskeletal activity;other molecular function		Myo31DF	0.877	1.199	1.051	0.996	1.055	0.741576	0.997412	0.994562	0.994447	0.992006	8.44	13.1	3.82	3
O46037	Vinculin	45	667	35	961	cell adhesion	plasma membrane;other membranes;cytoskeleton;other cell component	cytoskeletal activity;other molecular function	Neutrophil degranulation; Platelet degranulation ; Smooth Muscle Contraction; MAP2K and MAPK activation	Vinc	0.945	1.026	0.969	1.01	0.959	0.983502	0.991669	0.994562	0.999436	0.992006	5.6	5.73	5.35	2.75
Q05825	ATP synthase subunit beta, mitochondrial	81	13249	35	505	other metabolic processes;transport	other membranes;mitochondrion	transporter activity;other molecular function	Formation of ATP by chemiosmotic coupling; Cristae formation; Mitochondrial protein import	ATPsynbeta	0.937	0.826	0.774	1.022	0.758	0.954286	0.991669	0.994562	0.994447	0.992006	8.9	8.72	9.15	12.28
M9PCQ1	NADPH--cytochrome P450 reductase	53	1113	35	679		other membranes;ER/Golgi	other molecular function		Cpr	0.857	1.398	1.198	1.023	1.172	0.521695	0.991669	0.996921	0.994447	0.993518	12.72	6.09	8.41	5.22
Q8IRH0	LP21249p	37	557	35	1053	protein metabolism;other metabolic processes	other cell component	other molecular function		Psa	0.963	1.249	1.203	0.959	1.254	0.998656	0.991669	0.996921	0.953746	0.992006	10.25	7.88	7.9	5.67
Q9I7N0	FI23224p1	32	503	35	1548	transport;other biological processes	other membranes	transporter activity;other molecular function		MRP	0.969	1.214	1.176	1.118	1.052	0.998656	0.993922	0.997675	0.816432	0.993518	16.62	14.45	5.59	6.16
A8JTM7	Megalin, isoform A	11	263	35	4769	transport;developmental processes;other biological processes	plasma membrane;other membranes;other cell component	other molecular function	Transport of RCbl within the body	mgl	1.053	0.983	1.036	0.972	1.065	0.998656	0.991669	0.994562	0.988545	0.992006	12.03	7.69	7.45	11.93
Q9VNX4	Multifunctional fusion protein	55	1087	35	574	other metabolic processes	mitochondrion	other molecular function		P5CDh1	0.913	0.878	0.802	0.935	0.858	0.861015	0.991669	0.994562	0.910312	0.992006	7.79	9.11	7.28	7.81
Q9VGZ3	Citrate hydro-lyase	68	1210	35	899	other metabolic processes	cytosol;mitochondrion;nucleus	other molecular function	Iron uptake and transport	Irp-1B	1.034	1.01	1.044	1.091	0.957	0.998656	0.991669	0.996106	0.928463	0.992006	8.89	6.14	8.97	8.38
Q9VUV9	Putative U5 small nuclear ribonucleoprotein 200 kDa helicase	22	271	35	2142	cell organization and biogenesis;RNA metabolism OR transcription;other metabolic processes;other biological processes	nucleus	nucleic acid binding activity;other molecular function	mRNA Splicing - Major Pathway; mRNA Splicing - Minor Pathway	Brr2	1.006	1.754	1.764	1.089	1.62	0.998656	0.888938	0.994562	0.969926	0.992006	25.06	23.47	25.6	12.49
Q94523	Succinate dehydrogenase [ubiquinone] flavoprotein subunit, mitochondrial	60	1715	35	661	other metabolic processes	other membranes;mitochondrion	other molecular function	Citric acid cycle (TCA cycle)	SdhA	0.987	0.812	0.801	0.95	0.843	0.998656	0.988593	0.994562	0.936959	0.992006	5.3	8.3	11.3	5.79
Q01604	Phosphoglycerate kinase	92	2759	35	415	cell-cell signaling;other metabolic processes;other biological processes	cytosol;cytoskeleton;other cell component	kinase activity;other molecular function	Gluconeogenesis; Glycolysis	Pgk	0.941	0.908	0.854	0.926	0.922	0.97338	0.991669	0.994562	0.85939	0.992006	4.41	7.17	6.53	7.67
Q9W401	Probable citrate synthase, mitochondrial	63	7137	34	464	other metabolic processes;other biological processes	mitochondrion	other molecular function	Citric acid cycle (TCA cycle)	kdn	1.054	0.661	0.697	0.973	0.716	0.998656	0.888938	0.994562	0.981479	0.992006	7.1	6.63	5.88	3.43
Q9VV75	AT02348p	85	3385	34	440	other metabolic processes	other membranes;mitochondrion	other molecular function	Respiratory electron transport	UQCR-C2	0.981	0.781	0.766	0.938	0.817	0.998656	0.980994	0.994562	0.926643	0.992006	15.44	5.04	6.99	8.41
O46067	EG:25E8.1 protein	48	610	34	923	stress response;other biological processes	non-structural extracellular;ER/Golgi	other molecular function		Grp170	1.026	1.075	1.103	1.096	1.007	0.998656	0.999685	0.997675	0.913054	0.992006	9.65	4.88	8.42	7.49
A0A0B4KFE9	Nucleoprotein TPR	19	289	34	2346	transport	nucleus			Mtor	1.083	1.246	1.349	0.959	1.407	0.998656	0.995286	0.994562	0.969803	0.992006	10.11	6.51	7.97	14.48
Q9VYQ8	Ubiquitin carboxyl-terminal hydrolase 7	37	349	34	1129	protein metabolism;other metabolic processes;other biological processes	cytosol;nucleus;other cell component	other molecular function	Ub-specific processing proteases; Synthesis of active ubiquitin: roles of E1 and E2 enzymes; Regulation of TP53 Degradation; Formation of TC-NER Pre-Incision Complex; Dual incision in TC-NER; Gap-filling DNA repair synthesis and ligation in TC-NER; Regulation of PTEN localization	Usp7	1.346	1.152	1.551	0.922	1.683	0.405344	0.999685	0.994562	0.927844	0.992006	28.95	19.4	22.56	14.83
Q9VAY2	HSP 82	50	828	34	787	protein metabolism;other metabolic processes;stress response;developmental processes;other biological processes	non-structural extracellular;ER/Golgi;other cell component	other molecular function	Regulation of Insulin-like Growth Factor (IGF) transport and uptake by Insulin-like Growth Factor Binding Proteins (IGFBPs); Post-translational protein phosphorylation; Interleukin-4 and Interleukin-13 signaling	Gp93	1.015	1.797	1.824	1.108	1.645	0.999628	0.926861	0.994562	0.850378	0.992006	3.45	5.88	20.94	11.53
Q9VE79	Uncharacterized protein	43	812	34	966		non-structural extracellular;extracellular matrix		Neutrophil degranulation; HS-GAG degradation	Dmel\CG14309	1.322	2.437	3.22	1.12	2.876	0.142932	0.624612	0.737755	0.911633	0.604456	32.85	19.95	48.16	43.35
Q23979	Unconventional myosin IC	38	521	33	1035	cell organization and biogenesis;stress response;transport;developmental processes;other biological processes	plasma membrane;other membranes;cytoskeleton;other cell component	cytoskeletal activity;other molecular function		Myo61F	0.886	1.13	1.001	1.053	0.95	0.704175	0.999685	0.996106	0.983746	0.992006	20.66	15.99	8.25	4.22
Q9VYD9	AT04676p	55	1333	33	575	other metabolic processes		other molecular function	Alanine metabolism	ALT	0.994	1.287	1.279	1.042	1.227	0.998656	0.991669	0.996106	0.994447	0.992006	7.04	4.89	4.85	5.88
Q9VHP0	ATP-dependent RNA helicase bel	46	928	33	798	cell cycle OR cell proliferation;cell organization and biogenesis;developmental processes;other biological processes	nucleus;other cell component	nucleic acid binding activity;other molecular function	Neutrophil degranulation	bel	1.235	1.517	1.874	0.862	2.174	0.387183	0.991669	0.994562	0.422139	0.983761	20.06	16.49	25.61	25.87
X2J516	Trifunctional purine biosynthetic protein adenosine-3	31	467	33	1353	other metabolic processes		other molecular function		Gart	1.098	1.236	1.357	1.168	1.162	0.961241	0.991669	0.994562	0.535415	0.994735	10.81	7.63	16.85	9.19
Q8T8W3	AT21416p	69	747	33	540	cell organization and biogenesis;transport;developmental processes;other biological processes	plasma membrane;other membranes;other cytoplasmic organelle;other cell component	other molecular function	Factors involved in megakaryocyte development and platelet production	Past1	1	1.154	1.154	1.025	1.126	0.998656	0.999685	0.999688	0.994447	0.999391	10.48	11.43	4.21	5.95
Q9VNW6	Delta-1-pyrroline-5-carboxylate synthase	52	1771	33	776	other metabolic processes	mitochondrion	kinase activity;other molecular function	Glutamate and glutamine metabolism	P5CS	0.899	1.117	1.004	1.074	0.934	0.782951	0.999685	0.996106	0.939976	0.992006	13.9	7.54	5.69	6.26
Q9W374	Dihydropyrimidine dehydrogenase [NADP(+)]	45	461	33	1031	other metabolic processes	cytosol	other molecular function	Pyrimidine catabolism	su(r)	0.955	1.007	0.962	0.965	0.997	0.998656	0.991669	0.994562	0.963131	0.992006	13.92	30.49	12.67	6.66
P13706	Glycerol-3-phosphate dehydrogenase [NAD(+)], cytoplasmic	92	5940	33	363	other metabolic processes;stress response;other biological processes	cytosol;cytoskeleton;other cell component	other molecular function	Synthesis of PA	Gpdh1	0.908	0.902	0.819	1.042	0.786	0.835822	0.991669	0.994562	0.994447	0.992006	20.03	15.74	15.03	10.82
Q94920	Voltage-dependent anion-selective channel	90	3659	33	282	cell organization and biogenesis;transport;developmental processes;signal transduction;other biological processes	other membranes;mitochondrion;other cell component	transporter activity	Ub-specific processing proteases; Pyruvate metabolism; PINK1-PRKN Mediated Mitophagy	porin	0.983	0.855	0.84	0.949	0.885	0.998656	0.991669	0.994562	0.935827	0.992006	4.99	4.53	7.83	8.12
Q9VHL2	T-complex protein 1 subunit eta	70	949	33	544	other biological processes	cytosol	other molecular function	RHOBTB2 GTPase cycle; RHOBTB1 GTPase cycle; Cooperation of PDCL (PhLP1) and TRiC/CCT in G-protein beta folding; Association of TriC/CCT with target proteins during biosynthesis	CCT7	1.165	1.733	2.019	1.049	1.924	0.697178	0.943317	0.994562	0.988285	0.992006	18.07	14.3	27.69	21.44
Q7KKI0	Chaperonin containing TCP1 subunit 5, isoform A	73	962	33	542	other biological processes	cytosol	other molecular function	Cooperation of PDCL (PhLP1) and TRiC/CCT in G-protein beta folding; Association of TriC/CCT with target proteins during biosynthesis	CCT5	1.348	1.492	2.012	1.028	1.956	0.0989804	0.991669	0.994562	0.994447	0.992006	29.74	23.71	33.96	26.38
A1Z6H7	Nuclear pore membrane glycoprotein 210	26	349	33	1876	cell organization and biogenesis;transport	other membranes;nucleus;other cell component		Transport of the SLBP independent Mature mRNA; Transport of the SLBP Dependant Mature mRNA; Transport of Mature mRNA Derived from an Intronless Transcript; Transport of Mature mRNA derived from an Intron-Containing Transcript; Nuclear Pore Complex (NPC) Disassembly; Regulation of HSF1-mediated heat shock response; SUMOylation of SUMOylation proteins; SUMOylation of chromatin organization proteins…	Gp210	1.194	1.991	2.377	0.943	2.519	0.55999	0.859175	0.964289	0.936959	0.840736	58.51	66.57	59.31	80.73
A0A0B4KHW3	Aralar1, isoform F	47	858	32	694	transport	other membranes;mitochondrion	other molecular function		aralar1	1.019	1.16	1.183	1.17	1.01	0.999628	0.999685	0.997675	0.520994	0.992006	5.64	2.44	4.83	7.09
Q9VMA3	Protein cup	42	582	32	1117	cell cycle OR cell proliferation;cell organization and biogenesis;developmental processes;other biological processes	nucleus;other cell component	nucleic acid binding activity;other molecular function		cup	2.383	1.193	2.842	1.179	2.41	6.59991e-11	0.999685	0.83156	0.699379	0.968262	67.95	41.13	65.4	57.29
A0A0B4K623	C-1-tetrahydrofolate synthase, cytoplasmic	41	527	32	965	other metabolic processes		other molecular function		pug	1.001	1.218	1.22	1.238	0.986	0.998656	0.991669	0.996701	0.192306	0.992006	7.09	7.54	15.4	10.07
Q9VN25	Eukaryotic translation initiation factor 3 subunit A	33	667	32	1140	cell organization and biogenesis;protein metabolism;other metabolic processes;other biological processes	translational apparatus;other cell component	nucleic acid binding activity	L13a-mediated translational silencing of Ceruloplasmin expression; Translation initiation complex formation; Formation of a pool of free 40S subunits; Formation of the ternary complex, and subsequently, the 43S complex; Ribosomal scanning and start codon recognition	eIF3a	1.049	1.855	1.947	0.966	2.016	0.998656	0.901875	0.994562	0.963131	0.992006	6.17	8.23	23.01	19.34
Q0E993	Valyl-tRNA synthetase	40	423	32	1049	protein metabolism;RNA metabolism OR transcription;other metabolic processes	other cell component	other molecular function		ValRS	1.224	1.24	1.517	1.031	1.471	0.483653	0.991669	0.994562	0.994447	0.992006	23.09	17.05	19.65	15.43
P15348	DNA topoisomerase 2	29	411	32	1447	cell cycle OR cell proliferation;cell organization and biogenesis;DNA metabolism;other metabolic processes	nucleus;other cell component	nucleic acid binding activity;other molecular function	SUMOylation of DNA replication proteins	Top2	0.982	1.583	1.554	0.994	1.564	0.998656	0.987099	0.994562	0.994447	0.992006	15.17	14.1	14.4	12.43
Q9VWV6	Transferrin	62	655	32	641	transport;other biological processes	non-structural extracellular;other cytoplasmic organelle	other molecular function	Neutrophil degranulation; Platelet degranulation ; Regulation of Insulin-like Growth Factor (IGF) transport and uptake by Insulin-like Growth Factor Binding Proteins (IGFBPs); Post-translational protein phosphorylation; Iron uptake and transport; Metal sequestration by antimicrobial proteins	Tsf1	0.793	3.267	2.591	1.86	1.393	0.187435	0.219684	0.934971	9.87857e-11	0.992006	21.96	31.12	26.73	44.29
A1ZBJ2	Uncharacterized protein, isoform B	54	845	32	627	other metabolic processes	other membranes;mitochondrion	other molecular function	Beta oxidation of palmitoyl-CoA to myristoyl-CoA	Acadvl	0.861	1.233	1.061	1.058	1.004	0.546492	0.991669	0.996701	0.973354	0.992006	11.32	13.69	3.89	6.09
A1Z9J3	Short stop, isoform H	28	2686	32	8805	cell organization and biogenesis;stress response;developmental processes;other biological processes	plasma membrane;other membranes;cytoskeleton;other cell component	cytoskeletal activity;other molecular function	Neutrophil degranulation; Apoptotic cleavage of cell adhesion proteins; RHOU GTPase cycle; RHOV GTPase cycle; Type I hemidesmosome assembly; Formation of the cornified envelope	shot	1.103	0.859	0.947	1.039	0.912	0.998656	0.981004	0.994562	0.994447	0.992006	4.51	8.92	5.44	7.73
P17210	Kinesin heavy chain	41	478	32	975	cell cycle OR cell proliferation;cell organization and biogenesis;transport;developmental processes;other biological processes	cytosol;cytoskeleton;other cell component	cytoskeletal activity;other molecular function	COPI-dependent Golgi-to-ER retrograde traffic; Kinesins	Khc	0.833	1.985	1.654	1.289	1.282	0.373526	0.872487	0.994562	0.149404	0.992006	23.82	19.75	50.3	54.85
Q09332	UDP-glucose:glycoprotein glucosyltransferase	31	442	32	1548	protein metabolism;other metabolic processes;stress response	ER/Golgi;nucleus;other cell component	other molecular function		Uggt	1.295	1.483	1.921	1.263	1.521	0.328238	0.991669	0.994562	0.326413	0.992006	25.69	19.92	28.39	20.17
Q9VEB1	Malate dehydrogenase	76	2434	31	336	other metabolic processes;developmental processes;other biological processes	mitochondrion;other cell component	other molecular function	Gluconeogenesis; Citric acid cycle (TCA cycle)	Mdh2	0.996	0.836	0.832	0.991	0.84	0.998656	0.991669	0.994562	0.994447	0.992006	8.56	12.02	7.25	5.24
P21187	Polyadenylate-binding protein	59	963	31	634	cell-cell signaling;cell cycle OR cell proliferation;cell organization and biogenesis;RNA metabolism OR transcription;other metabolic processes;developmental processes;other biological processes	other cell component	nucleic acid binding activity	Nonsense Mediated Decay (NMD) enhanced by the Exon Junction Complex (EJC); AUF1 (hnRNP D0) binds and destabilizes mRNA; Deadenylation of mRNA; L13a-mediated translational silencing of Ceruloplasmin expression; Translation initiation complex formation; Nonsense Mediated Decay (NMD) independent of the Exon Junction Complex (EJC)	pAbp	1.231	1.355	1.667	1.102	1.512	0.406384	0.991669	0.994562	0.883707	0.992006	17.2	20.15	23.59	18.35
Q9VF53	Aldehyde oxidase 1	38	497	31	1273	other metabolic processes	other cytoplasmic organelle	other molecular function		AOX1	0.786	0.963	0.757	1.133	0.668	0.15715	0.991669	0.994562	0.740671	0.992006	24.27	10.66	16.39	14.05
A0A0B4K6W2	Ubiquitinyl hydrolase 1	14	258	31	2761	protein metabolism;other metabolic processes		other molecular function		faf	1.352	0.833	1.126	0.705	1.598	0.191229	0.98327	0.996921	0.00556475	0.992006	18.76	15.84	18.69	7.34
Q8MRN5	Aminopeptidase	45	530	31	952	protein metabolism;other metabolic processes	other cell component	other molecular function	Neutrophil degranulation; Antigen Presentation: Folding, assembly and peptide loading of class I MHC; Antigen processing: Ubiquitination & Proteasome degradation	CG5839	1.035	1.26	1.304	1.032	1.263	0.998656	0.991669	0.996106	0.994447	0.992006	31.24	16.71	14.97	7.17
Q9VL70	HL08109p	80	1065	31	398	other metabolic processes	mitochondrion	other molecular function	Mitochondrial Fatty Acid Beta-Oxidation	yip2	0.991	1.254	1.243	1.223	1.017	0.998656	0.991669	0.996106	0.249205	0.992006	6.27	6.64	11.09	7.82
Q9V3S0	Cytochrome P450 4g1	51	1915	31	556	other metabolic processes;developmental processes	other membranes;ER/Golgi	other molecular function	Vitamin D (calciferol) metabolism; Estrogen biosynthesis; Vitamins; Endogenous sterols	Cyp4g1	0.913	1.162	1.061	0.815	1.301	0.861501	0.999685	0.996701	0.129099	0.992006	13.65	8.28	11.57	13.19
Q9VG31	Malic enzyme	46	1391	31	763	other metabolic processes;other biological processes	cytosol;mitochondrion	other molecular function	Citric acid cycle (TCA cycle)	Men	1.076	1.014	1.091	1.05	1.039	0.998656	0.991669	0.996921	0.988285	0.993518	10.78	11.48	11.85	3.99
A1Z9M5	Uncharacterized protein	25	383	31	4012	cell organization and biogenesis;developmental processes;other biological processes	cytoskeleton	cytoskeletal activity		Sdb	1.02	1.012	1.032	1.145	0.902	0.999628	0.991669	0.994562	0.707853	0.992006	18.51	3.95	17.32	14.01
Q9VFF0	GH01077p	61	1871	31	470	cell organization and biogenesis;protein metabolism;other metabolic processes;transport		other molecular function	Processing of SMDT1; Respiratory electron transport	UQCR-C1	0.982	0.721	0.708	0.993	0.713	0.998656	0.943317	0.994562	0.994447	0.992006	17.6	16.08	11.15	11.63
A0A0B4K7L1	ATP-dependent 6-phosphofructokinase	39	2075	31	950	other metabolic processes	other cell component	kinase activity;other molecular function		Pfk	0.863	1.02	0.88	1.085	0.811	0.558306	0.991669	0.994562	0.931101	0.992006	13.35	11.58	16.48	12.31
A0A0B4K6V0	Bruchpilot, isoform L	21	227	31	1781	cell-cell signaling;cell organization and biogenesis;transport;other biological processes	cytoskeleton;other cell component			brp	0.733	0.783	0.574	1.003	0.573	0.314805	0.946966	0.871074	0.994447	0.857735	24.72	22.35	23.8	8.28
Q9VU94	Hemolectin, isoform A	12	201	31	3843	stress response;other biological processes	non-structural extracellular;extracellular matrix	other molecular function	Platelet degranulation ; Integrin signaling; Dectin-2 family; Termination of O-glycan biosynthesis; p130Cas linkage to MAPK signaling for integrins; Integrin cell surface interactions; MAP2K and MAPK activation; GRB2:SOS provides linkage to MAPK signaling for Integrins ; O-glycosylation of TSR domain-containing proteins	Hml	0.81	0.773	0.626	0.809	0.774	0.619116	0.936111	0.938176	0.340507	0.992006	19.78	12.03	10.53	19.19
A1ZAB5	Protein clueless	30	533	31	1448	cell cycle OR cell proliferation;cell organization and biogenesis;developmental processes;other biological processes	other membranes;cytoskeleton;mitochondrion;ER/Golgi;other cell component	translation activity;nucleic acid binding activity		clu	1.042	1.592	1.658	0.935	1.774	0.998656	0.982615	0.994562	0.931101	0.992006	4.16	9.61	22.94	22.36
Q9V521	Phenoloxidase 2	47	662	31	684	other metabolic processes;stress response	non-structural extracellular;cytosol	other molecular function		PPO2	0.834	0.793	0.662	0.954	0.694	0.389707	0.987099	0.994562	0.939976	0.992006	12.51	12.25	10.05	16.95
Q9VW68	(S)-3-amino-2-methylpropionate transaminase	70	1234	31	486	other metabolic processes;other biological processes	mitochondrion	other molecular function	Degradation of GABA	Gabat	1.019	1.299	1.324	1.011	1.309	0.999628	0.991669	0.994562	0.999871	0.992006	7.54	14.16	5.94	12.97
E1JIJ5	Vacuolar proton pump subunit B	72	1771	30	490	other metabolic processes;transport	other membranes	transporter activity;other molecular function		Vha55	1.023	0.942	0.964	1.068	0.902	0.999039	0.991669	0.994562	0.955309	0.992006	7.06	7.54	6.3	8.02
Q86BJ0	Uncharacterized protein, isoform C	40	509	30	711	other metabolic processes	other cell component	cytoskeletal activity;other molecular function		Dmel\CG18135	1.013	0.349	0.353	1.006	0.351	0.998656	0.132416	0.447556	0.994447	0.368821	15.65	13.48	18.16	16.78
Q9VQ61	Aspartate aminotransferase	76	1213	30	424	cell organization and biogenesis;other metabolic processes;developmental processes		other molecular function		Got2	1.091	1.609	1.755	1.211	1.45	0.982233	0.976218	0.994562	0.303029	0.992006	4.59	6.54	8.9	7.73
Q7K511	CG3835-RA	62	531	30	533	other metabolic processes	mitochondrion;other cytoplasmic organelle	other molecular function	Interconversion of 2-oxoglutarate and 2-hydroxyglutarate	D2hgdh	1.109	1.087	1.205	1.378	0.875	0.934555	0.999685	0.996921	0.00640916	0.992006	20.91	2.64	15.42	9.8
Q8IP94	Threonyl-tRNA synthetase	51	616	30	690	protein metabolism;RNA metabolism OR transcription;other metabolic processes	mitochondrion;other cell component	other molecular function		ThrRS	1.159	1.248	1.447	0.895	1.617	0.71622	0.991669	0.994562	0.677002	0.992006	18.6	9.38	21.2	17.23
P25823	Maternal protein tudor	17	243	30	2515	cell organization and biogenesis;RNA metabolism OR transcription;other metabolic processes;developmental processes;other biological processes	cytosol;mitochondrion;nucleus;other cell component			tud	1.317	1.279	1.685	0.917	1.838	0.518683	0.991669	0.994562	0.913054	0.992006	29.89	18.64	23.86	19.05
Q9VXQ5	Chaperonin containing TCP1 subunit 6	58	612	30	533	cell cycle OR cell proliferation;cell organization and biogenesis;other biological processes	cytosol	other molecular function	RHOBTB2 GTPase cycle; Cooperation of PDCL (PhLP1) and TRiC/CCT in G-protein beta folding; Association of TriC/CCT with target proteins during biosynthesis	CCT6	1.192	2.004	2.389	1.015	2.352	0.570683	0.853684	0.964289	0.999219	0.934964	35.26	38.07	43.31	46.82
Q9VN21	LD30155p	52	780	30	545	cell organization and biogenesis;RNA metabolism OR transcription;other metabolic processes;developmental processes;other biological processes	other cell component			lost	0.984	1.857	1.827	1.069	1.708	0.998656	0.901519	0.994562	0.951632	0.992006	7.07	6.36	17.48	12.07
Q9VWH4	Probable isocitrate dehydrogenase [NAD] subunit alpha, mitochondrial	76	2571	30	377	other metabolic processes		other molecular function	Citric acid cycle (TCA cycle)	Idh3a	1.071	0.78	0.835	1.027	0.814	0.998656	0.979739	0.994562	0.994447	0.992006	8.07	6.41	2.98	5.34
A0A0B4LFL2	Eukaryotic translation initiation factor 3 subunit C	30	689	30	910	cell organization and biogenesis;protein metabolism;other metabolic processes	translational apparatus;other cell component	nucleic acid binding activity;other molecular function		eIF3c	1.063	1.519	1.614	1.022	1.579	0.998656	0.991669	0.994562	0.994447	0.992006	3.25	11.07	12.9	11.14
Q9TVM2	Exportin-1	36	409	30	1063	cell cycle OR cell proliferation;cell organization and biogenesis;transport;other biological processes	other membranes;nucleus;other cell component	other molecular function	Heme signaling; Deactivation of the beta-catenin transactivating complex; Cyclin A/B1/B2 associated events during G2/M transition; HuR (ELAVL1) binds and stabilizes mRNA; Estrogen-dependent nuclear events downstream of ESR-membrane signaling	emb	1.049	1.853	1.945	0.962	2.02	0.998656	0.888938	0.994562	0.969803	0.992006	25.08	18.17	25.83	18.36
Q9VAC1	Acetyl-CoA deacylase	76	4218	30	477	other metabolic processes		other molecular function		anon-WO0153538.36	0.995	0.877	0.873	1.002	0.871	0.998656	0.991669	0.994562	0.994447	0.992006	11.13	7.22	6.73	5.54
Q9VPE2	NADH dehydrogenase (Ubiquinone) 39 kDa subunit, isoform A	68	1073	30	416	cell organization and biogenesis;other metabolic processes	other membranes;mitochondrion	other molecular function	Complex I biogenesis	ND-39	1.071	0.804	0.861	0.997	0.863	0.998656	0.988593	0.994562	0.994447	0.992006	20.15	11.87	15.62	12.82
M9PHG2	Moesin/ezrin/radixin homolog 1	49	1320	29	584	developmental processes;other biological processes	plasma membrane;other membranes;cytoskeleton;other cell component	cytoskeletal activity		Moe	1.093	1.244	1.359	1	1.36	0.980388	0.991669	0.994562	0.994447	0.992006	5.32	10.89	3.2	7.14
Q9VB05	ALG-2 interacting protein X	38	423	29	836	cell cycle OR cell proliferation;cell organization and biogenesis;protein metabolism;other metabolic processes;transport;other biological processes	cytoskeleton;other cytoplasmic organelle;other cell component			ALiX	1.232	1.031	1.27	0.912	1.392	0.541313	0.991669	0.996701	0.862654	0.992006	22.14	13.07	24.21	6.72
P52029	Glucose-6-phosphate isomerase	66	1862	29	558	other metabolic processes;other biological processes	cytosol	other molecular function	Neutrophil degranulation; Gluconeogenesis; Glycolysis; TP53 Regulates Metabolic Genes	Pgi	1.076	0.946	1.018	1.045	0.974	0.998656	0.991669	0.996106	0.993831	0.992006	9.43	6.67	2.82	4.47
O16797	60S ribosomal protein L3	66	1863	29	416	protein metabolism;other metabolic processes	cytosol;translational apparatus	nucleic acid binding activity;other molecular function	Nonsense Mediated Decay (NMD) enhanced by the Exon Junction Complex (EJC); L13a-mediated translational silencing of Ceruloplasmin expression; Formation of a pool of free 40S subunits; Nonsense Mediated Decay (NMD) independent of the Exon Junction Complex (EJC); SRP-dependent cotranslational protein targeting to membrane; GTP hydrolysis and joining of the 60S ribosomal subunit	RpL3	0.957	2.148	2.056	1.009	2.039	0.998656	0.782552	0.994562	0.997064	0.992006	4.32	5.07	17.05	17.42
Q8MT58	Carnosine dipeptidase 2, isoform A	76	603	29	478		cytosol;nucleus	other molecular function	Paracetamol ADME; Glutathione synthesis and recycling	Cndp2	1.159	1.127	1.307	1.081	1.209	0.717447	0.999685	0.996106	0.933682	0.992762	18.95	19.49	14.95	10.49
A4V303	T-complex protein 1 subunit gamma	58	839	29	544	other biological processes	cytosol	other molecular function		CCT3	1.47	1.768	2.599	1.086	2.393	0.0108393	0.936111	0.934971	0.931101	0.90468	30.55	19.35	32.2	26.14
Q9VW54	26S proteasome non-ATPase regulatory subunit 2	42	921	29	919	protein metabolism;other metabolic processes;other biological processes	cytosol;nucleus;other cell component	enzyme regulator activity;other molecular function	Neutrophil degranulation; Ub-specific processing proteases; Activation of NF-kappaB in B cells; Downstream TCR signaling; FCERI mediated NF-kB activation; Interleukin-1 signaling; Antigen processing: Ubiquitination & Proteasome degradation; Neddylation; Regulation of RAS by GAPs; ABC-family proteins mediated transport; Degradation of beta-catenin by the destruction complex; Oxygen-dependent proli…	Rpn1	1.196	1.391	1.663	1.015	1.638	0.552673	0.991669	0.994562	0.999219	0.992006	22.8	13.72	19.31	9
Q7KUB1	Isocitrate dehydrogenase [NADP]	61	1710	29	469	other metabolic processes	cytosol;other cytoplasmic organelle	other molecular function		Idh	0.932	1.234	1.15	1.067	1.078	0.943818	0.991669	0.999991	0.957957	0.997929	8.66	2.15	8.08	2.23
Q9VWI2	N(Alpha)-acetyltransferase 15/16, isoform A	34	364	29	890	protein metabolism;other metabolic processes	other cell component			Naa15-16	1.098	1.319	1.448	0.931	1.556	0.975362	0.991669	0.994562	0.913054	0.992006	14.06	8.22	12.53	14.03
Q9W425	Rabconnectin-3A	12	237	29	3426	developmental processes;other biological processes	other cell component			Rbcn-3A	1.038	1.67	1.734	1.188	1.46	0.998656	0.947804	0.994562	0.646241	0.992006	27.32	30.82	27.67	26.14
P09180	60S ribosomal protein L4	52	1732	29	401	protein metabolism;other metabolic processes	cytosol;translational apparatus	nucleic acid binding activity;other molecular function	Nonsense Mediated Decay (NMD) enhanced by the Exon Junction Complex (EJC); L13a-mediated translational silencing of Ceruloplasmin expression; Formation of a pool of free 40S subunits; Nonsense Mediated Decay (NMD) independent of the Exon Junction Complex (EJC); SRP-dependent cotranslational protein targeting to membrane; GTP hydrolysis and joining of the 60S ribosomal subunit	RpL4	1.043	2.029	2.115	0.973	2.173	0.998656	0.836553	0.994562	0.982807	0.983761	6.65	8.14	15.85	14.13
Q9NJH0	Elongation factor 1-gamma	60	1028	29	431	protein metabolism;other metabolic processes	nucleus;other cell component	nucleic acid binding activity	Eukaryotic Translation Elongation	eEF1gamma	1.239	1.517	1.879	0.962	1.953	0.375963	0.991669	0.994562	0.961246	0.992006	22.26	10.12	30.93	24.46
A0A0B4K7A5	Hu li tai shao, isoform Q	51	424	29	739					hts	0.839	0.879	0.738	0.957	0.771	0.417824	0.991669	0.994562	0.942232	0.992006	11.73	16.14	5.18	9.17
X2J8F5	Larval serum protein 1 beta, isoform B	39	215	28	789		non-structural extracellular			Lsp1beta	0.541	0.565	0.306	1.482	0.206	0.000507093	0.490109	0.152797	0.00105438	0.00910051	32.21	24.36	49.61	39.73
M9MRJ4	Muscle-specific protein 300 kDa, isoform G	10	438	28	13540	cell organization and biogenesis;transport;developmental processes;other biological processes	other membranes;cytosol;cytoskeleton;nucleus;other cell component	cytoskeletal activity;other molecular function		Msp300	0.86	0.897	0.772	1.12	0.689	0.765109	0.991669	0.994562	0.931101	0.992006	31.39	21.4	18.57	14.12
Q9W2J5	Uncharacterized protein, isoform A	62	522	28	436	other biological processes				Dmel\CG44245	1.045	0.85	0.888	1.025	0.867	0.998656	0.991669	0.994562	0.994447	0.992006	7.15	5.77	8.84	8.51
Q9VLT3	LD23292p	22	277	28	1760	cell organization and biogenesis;stress response;transport;developmental processes	non-structural extracellular;plasma membrane;other membranes;other cell component	enzyme regulator activity;other molecular function	Neutrophil degranulation; Platelet degranulation ; Regulation of Insulin-like Growth Factor (IGF) transport and uptake by Insulin-like Growth Factor Binding Proteins (IGFBPs); Post-translational protein phosphorylation; Degradation of the extracellular matrix; Regulation of Complement cascade; Alternative complement activation; Activation of C3 and C5	Mcr	1.078	0.878	0.946	0.969	0.977	0.998656	0.988593	0.994562	0.988285	0.992006	4.71	13.88	14.97	15.95
Q24439	ATP synthase subunit O, mitochondrial	83	1537	28	209	other metabolic processes;transport	other membranes;mitochondrion	transporter activity	Formation of ATP by chemiosmotic coupling; Cristae formation	ATPsynO	0.824	0.918	0.756	0.923	0.819	0.331938	0.991669	0.994562	0.842234	0.992006	21.17	14.7	10.45	8.74
A4V0N4	H(+)-transporting two-sector ATPase	77	3913	28	614	other metabolic processes;transport	other membranes	transporter activity;other molecular function		Vha68-2	1.125	0.912	1.027	1.052	0.976	0.879309	0.991669	0.996106	0.985962	0.992006	5.14	7.35	4.56	1.38
P48591	Ribonucleoside-diphosphate reductase large subunit	35	543	28	812	DNA metabolism;other metabolic processes;other biological processes	cytosol	other molecular function	Interconversion of nucleotide di- and triphosphates	RnrL	1.54	1.562	2.405	0.948	2.537	0.0027006	0.988593	0.955797	0.935329	0.831568	35.56	27.52	30.95	25.86
P00334	Alcohol dehydrogenase	89	4530	28	256	other metabolic processes;other biological processes	cytosol;other cell component	other molecular function		Adh	1.003	0.895	0.897	0.968	0.927	0.998656	0.991669	0.994562	0.969803	0.992006	8.76	20.46	22.78	13.89
Q9VJ39	Leukotriene A(4) hydrolase	56	713	28	684	protein metabolism;other metabolic processes	cytosol;translational apparatus	other molecular function	Neutrophil degranulation; Synthesis of Leukotrienes (LT) and Eoxins (EX); Biosynthesis of D-series resolvins; Biosynthesis of E-series 18(S)-resolvins; Biosynthesis of protectins; Biosynthesis of aspirin-triggered D-series resolvins; Biosynthesis of E-series 18(R)-resolvins	pepCG10602	1.134	1.468	1.665	1.035	1.609	0.837999	0.991669	0.994562	0.994447	0.992006	21.66	15.87	19.66	14.08
Q9VU68	Actin-interacting protein 1	63	650	27	608	cell organization and biogenesis;developmental processes;other biological processes	cytoskeleton	cytoskeletal activity	Platelet degranulation	flr	1.023	1.101	1.126	0.958	1.175	0.999039	0.999685	0.9983	0.948198	0.993518	17.15	8.87	6.95	8.75
Q9XZU1	Exportin-2	36	409	27	975	transport		other molecular function		Cse1	1.807	1.364	2.463	1.006	2.449	0.00016787	0.991669	0.944061	0.994447	0.968262	54.66	33.95	43.37	27.14
Q9VC94	LD41803p	27	242	27	1430	RNA metabolism OR transcription;other metabolic processes	nucleus;other cell component	nucleic acid binding activity	Major pathway of rRNA processing in the nucleolus and cytosol	Rrp5	0.819	2.39	1.957	1	1.957	0.511855	0.436239	0.994562	0.994447	0.992006	21.3	18.97	27.34	16.59
A0A0B4K6F9	Extended synaptotagmin-like protein 2, isoform C	41	348	27	853	cell-cell signaling;cell organization and biogenesis;transport	plasma membrane;other membranes;ER/Golgi	other molecular function	Glycosphingolipid metabolism; RHOD GTPase cycle; RHOF GTPase cycle	Esyt2	1.105	0.766	0.846	0.992	0.853	0.998656	0.936111	0.994562	0.994447	0.992006	6.74	10.69	5.23	10.82
P13217	1-phosphatidylinositol 4,5-bisphosphate phosphodiesterase	27	212	27	1095	other metabolic processes;signal transduction;other biological processes	plasma membrane;other membranes;other cell component	other molecular function	G alpha (q) signalling events; Synthesis of IP3 and IP4 in the cytosol; PLC beta mediated events	norpA	0.8	0.803	0.643	0.742	0.866	0.458796	0.936111	0.964289	0.0410417	0.992006	7.29	10.82	7.63	10.95
O01666	ATP synthase subunit gamma, mitochondrial	65	1729	27	297	other metabolic processes;transport	other membranes;mitochondrion	transporter activity	Formation of ATP by chemiosmotic coupling; Cristae formation	ATPsyngamma	0.957	0.972	0.93	1.014	0.917	0.998656	0.991669	0.994562	0.999871	0.992006	8.77	7.28	9.12	6.8
Q9VLH9	Alpha-mannosidase	48	819	27	1007	other metabolic processes	other cytoplasmic organelle	other molecular function	Lysosomal oligosaccharide catabolism	LManVI	0.982	2.383	2.34	1.488	1.572	0.998656	0.64966	0.964289	0.000204445	0.992006	20.43	14.69	18.62	9.93
Q9VIC9	10-formyltetrahydrofolate dehydrogenase	34	281	27	913	other metabolic processes	other cell component	other molecular function	Metabolism of folate and pterines	Dmel\CG8665	0.789	0.906	0.715	0.987	0.724	0.265887	0.991669	0.994562	0.994447	0.992006	13.03	18.6	9.24	10.86
Q9VFP1	Probable cytochrome P450 6d5	49	456	27	508		other membranes;ER/Golgi	other molecular function		Cyp6d5	1.001	1.76	1.761	1.064	1.655	0.998656	0.936111	0.994562	0.963131	0.992006	16.49	5.03	15.22	12.2
A1Z968	NAT1, isoform D	26	258	27	1488	protein metabolism;other metabolic processes;other biological processes	translational apparatus	nucleic acid binding activity	ISG15 antiviral mechanism	NAT1	0.954	2.468	2.354	0.941	2.503	0.998656	0.495718	0.955797	0.939976	0.902649	21.74	27.27	25.46	21.2
Q0KHY3	Protein mesh	22	355	27	1454	cell adhesion;cell organization and biogenesis	non-structural extracellular;plasma membrane;other membranes;other cell component			mesh	0.993	0.674	0.669	1.005	0.666	0.998656	0.827345	0.964289	0.995836	0.992006	18.33	6.52	7.87	9.45
M9PF57	Uncharacterized protein, isoform M	28	250	27	1385	cell organization and biogenesis;other biological processes	cytoskeleton;other cell component	cytoskeletal activity		CG8154	1.094	0.626	0.685	0.981	0.698	0.998656	0.717411	0.964289	0.994447	0.992006	11.99	13.86	15.09	6.76
Q9VLI0	Alpha-mannosidase	45	740	27	982	other metabolic processes	other cytoplasmic organelle	other molecular function	Lysosomal oligosaccharide catabolism	LManV	1.191	2.311	2.753	1.438	1.914	0.57225	0.697978	0.878852	0.00132661	0.992006	17.67	15.57	12.58	12.98
O18413	26S proteasome regulatory subunit 8	65	663	27	405	protein metabolism;other metabolic processes;other biological processes	cytosol;nucleus;other cell component	other molecular function	Antigen processing: Ubiquitination & Proteasome degradation; Neddylation; Regulation of RAS by GAPs; ABC-family proteins mediated transport; Degradation of beta-catenin by the destruction complex; Ub-specific processing proteases; Activation of NF-kappaB in B cells; Oxygen-dependent proline hydroxylation of Hypoxia-inducible Factor Alpha; Cross-presentation of soluble exogenous antigens (endosome…	Rpt6	0.949	1.287	1.221	1.001	1.22	0.987989	0.991669	0.996701	0.994447	0.992006	18.37	7.84	17.75	16.66
M9PB90	Cullin-associated and neddylation-dissociated 1, isoform B	25	312	27	1248	cell organization and biogenesis				Cand1	1.324	1.332	1.764	1.073	1.644	0.245223	0.991669	0.994562	0.969803	0.992006	28.49	19.62	28.93	22.78
A1Z7Z4	Uncharacterized protein, isoform B	95	424	27	232					Dmel\CG1648	0.699	0.55	0.385	0.815	0.472	0.0101187	0.717959	0.60978	0.128024	0.75465	22	20.03	14.6	25.91
Q9I7S8	Multifunctional protein ADE2	61	849	27	429	other metabolic processes	other cell component	other molecular function	Purine ribonucleoside monophosphate biosynthesis	Paics	0.904	0.708	0.64	1.146	0.559	0.822598	0.936111	0.994562	0.675462	0.968262	13.22	8.63	21.5	15.75
Q9VAW5	La-related protein 1	26	337	27	1673	cell cycle OR cell proliferation;cell organization and biogenesis;developmental processes;other biological processes	other membranes;cytosol;mitochondrion;other cell component	nucleic acid binding activity		larp	1.081	1.802	1.948	0.979	1.989	0.998656	0.906139	0.994562	0.994447	0.992006	4.54	9.03	19.3	27.93
Q7K5K3	Pyruvate dehydrogenase E1 component subunit beta	59	1407	27	365	other metabolic processes	mitochondrion	other molecular function	Glyoxylate metabolism and glycine degradation; Regulation of pyruvate dehydrogenase (PDH) complex; Signaling by Retinoic Acid	Pdhb	0.977	0.729	0.712	1.04	0.685	0.998656	0.945683	0.994562	0.994447	0.992006	9.67	7.55	8.22	5.33
Q7KUT2	Lon protease homolog, mitochondrial	35	262	27	1024	cell organization and biogenesis;protein metabolism;other metabolic processes;stress response;other biological processes	mitochondrion;other cytoplasmic organelle	nucleic acid binding activity;other molecular function		Lon	1.261	1.13	1.425	1.164	1.224	0.326643	0.999708	0.994562	0.566026	0.992006	20.82	23.6	22.59	8.8
P13469	DNA-binding protein modulo	51	588	27	542	RNA metabolism OR transcription;other metabolic processes	nucleus;other cell component	nucleic acid binding activity		mod	0.828	2.13	1.763	1.072	1.644	0.35027	0.793273	0.994562	0.939976	0.992006	33.86	20.23	9.44	12.8
Q9V7N5	V-type proton ATPase subunit C	28	926	27	836	transport	plasma membrane;other membranes;other cytoplasmic organelle	transporter activity	ROS and RNS production in phagocytes; Insulin receptor recycling; Transferrin endocytosis and recycling; Amino acids regulate mTORC1; Ion channel transport	Vha44	0.935	0.917	0.858	1.009	0.851	0.954286	0.991669	0.994562	0.99733	0.992006	5.88	6.87	10.57	7.16
Q7KW39	Probable methylmalonate-semialdehyde dehydrogenase [acylating], mitochondrial	55	567	26	520	other metabolic processes	mitochondrion	other molecular function	Branched-chain amino acid catabolism		1.046	1.231	1.288	1.018	1.264	0.998656	0.991669	0.996106	0.995715	0.992006	7.72	7.89	7.77	7.36
Q9V4I1	Cytochrome P450 9b2	58	319	26	505		other membranes;ER/Golgi	other molecular function		Cyp9b2	1.17	1.944	2.275	1.044	2.179	0.673546	0.888938	0.964289	0.994447	0.983761	12.19	23.2	26.11	28.01
Q9VM69	CG10206-PA	60	444	26	511	RNA metabolism OR transcription;other metabolic processes	nucleus;other cell component	nucleic acid binding activity	Major pathway of rRNA processing in the nucleolus and cytosol; SUMOylation of RNA binding proteins	nop5	0.879	1.472	1.294	0.946	1.367	0.653536	0.991669	0.996106	0.932299	0.992006	15.73	16.62	24.58	5.13
Q9VIH3	Microsomal triacylglycerol transfer protein	39	367	26	886	cell organization and biogenesis;protein metabolism;other metabolic processes;transport;developmental processes	plasma membrane;other membranes;ER/Golgi	transporter activity;other molecular function	LDL remodeling	Mtp	1.12	0.805	0.902	1.094	0.824	0.897272	0.988593	0.994562	0.91592	0.992006	10.87	9.66	16.88	16.28
Q9W3X6	Fumarate hydratase	63	1427	26	495	other metabolic processes	other cell component	other molecular function	Citric acid cycle (TCA cycle)	Fum1	0.967	0.871	0.842	0.986	0.854	0.998656	0.991669	0.994562	0.994447	0.992006	8.95	5.93	5.93	5.25
Q06559	40S ribosomal protein S3	75	1441	26	246	protein metabolism;DNA metabolism;other metabolic processes;stress response;other biological processes	cytosol;translational apparatus;nucleus	nucleic acid binding activity;other molecular function	Nonsense Mediated Decay (NMD) enhanced by the Exon Junction Complex (EJC); L13a-mediated translational silencing of Ceruloplasmin expression; Translation initiation complex formation; Formation of a pool of free 40S subunits; Formation of the ternary complex, and subsequently, the 43S complex; Ribosomal scanning and start codon recognition; Nonsense Mediated Decay (NMD) independent of the Exon Ju…	RpS3	1.018	1.682	1.713	1.019	1.681	0.999628	0.955998	0.994562	0.995443	0.992006	2.19	4.64	18.26	13.72
A8DY81	Not1, isoform C	14	254	26	2505	RNA metabolism OR transcription;other metabolic processes;other biological processes	nucleus;other cell component	other molecular function		Not1	0.888	2.33	2.069	1.178	1.757	0.711416	0.686554	0.994562	0.526348	0.992006	11.64	15.16	24.03	25.15
A0A0B4JCW4	Succinate--CoA ligase [ADP-forming] subunit beta, mitochondrial	48	1838	26	451	other metabolic processes;developmental processes;other biological processes	mitochondrion;other cell component	other molecular function		ScsbetaA	1.042	0.824	0.859	1.013	0.847	0.998656	0.991669	0.994562	0.999871	0.992006	6.8	8.89	4.29	6.42
P17336	Catalase	68	1298	26	506	cell-cell signaling;other metabolic processes;stress response;developmental processes;other biological processes	mitochondrion;other cytoplasmic organelle;other cell component	other molecular function	Neutrophil degranulation; Peroxisomal protein import; Detoxification of Reactive Oxygen Species	Cat	1.064	1.193	1.269	1.148	1.105	0.998656	0.99616	0.996106	0.660989	0.999838	5.73	30.19	7.52	6.5
M9PI44	Trailer hitch, isoform F	41	891	26	653	cell organization and biogenesis	nucleus;other cell component	nucleic acid binding activity		tral	1.833	1.295	2.374	1.038	2.286	2.68845e-06	0.991669	0.964289	0.994447	0.968262	46.78	28.75	50.37	49.03
Q23997	Imaginal disk growth factor 6	53	724	26	452	other metabolic processes;stress response;developmental processes;other biological processes	non-structural extracellular	signal transduction activity or receptor binding;other molecular function	Neutrophil degranulation; Digestion of dietary carbohydrate	Idgf6	0.934	0.813	0.76	1.129	0.673	0.953471	0.988593	0.994562	0.761101	0.992006	13.05	11.74	9.27	11.01
Q7K3J0	CCT-theta	54	910	26	546	other biological processes	cytosol	other molecular function	Neutrophil degranulation; Cooperation of PDCL (PhLP1) and TRiC/CCT in G-protein beta folding; Association of TriC/CCT with target proteins during biosynthesis	CCT8	1.345	1.606	2.159	1.098	1.967	0.102706	0.977533	0.994562	0.907701	0.992006	26.12	20.52	34.48	25.34
Q8SWX4	Aminopeptidase	28	525	26	961	protein metabolism;other metabolic processes	other cell component	other molecular function	Neutrophil degranulation; Antigen Presentation: Folding, assembly and peptide loading of class I MHC; Antigen processing: Ubiquitination & Proteasome degradation	CG5839	0.804	1.463	1.176	1.196	0.983	0.233011	0.991669	0.997675	0.379805	0.992006	28.3	18.93	30.04	14.12
Q7KN90	Cysteine--tRNA ligase, cytoplasmic	40	281	26	741	protein metabolism;RNA metabolism OR transcription;other metabolic processes	other cell component	nucleic acid binding activity;other molecular function		CysRS	1.404	1.29	1.811	1.178	1.537	0.213559	0.991669	0.994562	0.658884	0.992006	27.61	18.19	32.34	27.46
Q8IN25	Aminopeptidase	34	629	26	940	protein metabolism;other metabolic processes	other membranes;other cell component	other molecular function	Neutrophil degranulation; Antigen Presentation: Folding, assembly and peptide loading of class I MHC; Antigen processing: Ubiquitination & Proteasome degradation	Dmel\CG31198	0.893	0.814	0.727	1.203	0.604	0.745091	0.988593	0.994562	0.337592	0.992006	32.97	12.75	18.96	7.24
Q9VN14	Contactin	28	334	26	1390	cell adhesion;cell organization and biogenesis;developmental processes;other biological processes	other cell component	other molecular function	Regulation of commissural axon pathfinding by SLIT and ROBO	Cont	0.968	0.968	0.936	0.944	0.992	0.998656	0.991669	0.994562	0.950526	0.992006	8.03	10.45	6.25	9.56
Q9V3J1	V-type proton ATPase subunit H	62	972	26	468	transport;other biological processes	plasma membrane;other membranes;other cytoplasmic organelle	transporter activity	ROS and RNS production in phagocytes; Insulin receptor recycling; Transferrin endocytosis and recycling; Amino acids regulate mTORC1; Ion channel transport	VhaSFD	1.125	0.858	0.965	0.978	0.987	0.879309	0.991669	0.994562	0.989642	0.992006	8.49	10.21	4.53	4.05
Q9W247	FI03324p	25	304	25	1294	other metabolic processes		other molecular function	Glutathione synthesis and recycling	Dmel\CG4752	1.135	1.204	1.367	1.146	1.193	0.98153	0.997519	0.994562	0.833515	0.999838	13.24	9.37	17.97	9.39
Q8I0D4	RE20510p	30	577	25	952	transport	other cell component		Platelet degranulation ; Integrin cell surface interactions; O-glycosylation of TSR domain-containing proteins	Dmel\CG9297	1.05	0.663	0.697	0.956	0.729	0.998656	0.888956	0.994562	0.939976	0.992006	9.51	11.43	9.24	6.1
Q9VQB4	LD06553p	81	715	25	335	other metabolic processes		other molecular function		Dmel\CG3609	0.925	1.9	1.759	1.059	1.661	0.926852	0.888938	0.994562	0.969803	0.992006	13.04	7.38	6.21	3.42
Q9VXJ0	Peroxisomal multifunctional enzyme type 2	63	549	25	598	other metabolic processes	other cytoplasmic organelle	other molecular function	alpha-linolenic acid (ALA) metabolism; Peroxisomal protein import; Beta-oxidation of pristanoyl-CoA; Synthesis of bile acids and bile salts via 7alpha-hydroxycholesterol; Beta-oxidation of very long chain fatty acids	Mfe2	0.889	1.681	1.494	1.037	1.441	0.718363	0.955998	0.994562	0.994447	0.992006	15.93	8.25	10.7	4.09
Q9VVL7	Dihydrolipoyl dehydrogenase	51	1581	25	504	other metabolic processes	mitochondrion;other cell component	other molecular function	Branched-chain amino acid catabolism; Citric acid cycle (TCA cycle); Lysine catabolism; Regulation of pyruvate dehydrogenase (PDH) complex; Signaling by Retinoic Acid; Glycine degradation	E3	1.099	0.84	0.924	1.067	0.866	0.956246	0.991669	0.994562	0.957957	0.992006	7.45	7.63	9.01	4.06
D1YSG0	Bent, isoform F	55	8889	25	8933	cell organization and biogenesis;protein metabolism;other metabolic processes;other biological processes	cytoskeleton	kinase activity;other molecular function	Platelet degranulation	bt	0.921	0.844	0.778	1.034	0.752	0.909588	0.991669	0.994562	0.994447	0.992006	11.52	9.57	3.78	14.37
Q9VGP4	LP08082p	35	281	25	1018	transport;other biological processes	cytosol;nucleus	other molecular function		Ipo9	1.056	1.831	1.933	0.901	2.145	0.998656	0.888938	0.994562	0.850203	0.973294	33.95	27.07	36.7	42.68
A0A0B4KGI0	Uncharacterized protein, isoform E	27	361	25	1408	transport	plasma membrane;other membranes	transporter activity;other molecular function	Platelet degranulation ; Paracetamol ADME; ABC-family proteins mediated transport; Cargo recognition for clathrin-mediated endocytosis; Aggrephagy; Azathioprine ADME	Mrp5	1.153	0.988	1.139	1.147	0.993	0.954286	0.991669	0.996106	0.808197	0.992006	20.68	9.94	19.93	4.97
Q7JUS9	MIP16332p	55	4633	25	374	transport	other membranes;mitochondrion	transporter activity		Mpcp1	0.887	0.817	0.725	0.977	0.742	0.707983	0.988593	0.994562	0.988285	0.992006	21.96	20.3	15.46	10.9
P09052	ATP-dependent RNA helicase vasa	46	379	25	661	other biological processes	nucleus;other cell component	nucleic acid binding activity;other molecular function		vas	1.007	2.112	2.127	0.972	2.189	0.998656	0.787554	0.994562	0.988285	0.992006	6.27	9.86	20.01	12.31
X2J5G6	Ribosomal protein L7, isoform B	66	865	25	252	RNA metabolism OR transcription;other metabolic processes	cytosol;translational apparatus	other molecular function		RpL7	1.019	1.906	1.943	1.016	1.913	0.999628	0.888938	0.994562	0.999219	0.992006	12.58	7.62	12.94	8.36
Q9VF24	Crossveinless d	21	182	25	1470	transport;developmental processes;other biological processes	non-structural extracellular	transporter activity;other molecular function		cv-d	0.867	0.968	0.84	0.955	0.879	0.718363	0.991669	0.994562	0.963131	0.992006	17.51	16.71	12.36	17.65
X2J5E8	Peptidylprolyl isomerase	56	472	25	439			other molecular function		Fkbp59	1.347	2.037	2.743	1.113	2.466	0.101	0.835153	0.878852	0.838388	0.871593	28.73	18.11	33.01	23.92
P22817	Insulin-degrading enzyme	28	199	25	990	protein metabolism;other metabolic processes;other biological processes	plasma membrane;other membranes;cytosol;mitochondrion;other cytoplasmic organelle;other cell component	other molecular function	Peroxisomal protein import; Ub-specific processing proteases	Ide	1.075	1.554	1.671	1.059	1.579	0.998656	0.988593	0.994562	0.988285	0.992006	17.67	9.52	13.21	2.79
X2JCS6	60S ribosomal protein L7a	54	621	25	271	other biological processes	cytosol;translational apparatus	nucleic acid binding activity		RpL7A	0.812	1.868	1.518	0.865	1.754	0.275668	0.896023	0.994562	0.435057	0.992006	36.3	23.06	11.09	25.11
P41042	40S ribosomal protein S4	75	1526	25	261	protein metabolism;other metabolic processes	cytosol;translational apparatus	nucleic acid binding activity;other molecular function	Nonsense Mediated Decay (NMD) enhanced by the Exon Junction Complex (EJC); L13a-mediated translational silencing of Ceruloplasmin expression; Translation initiation complex formation; Formation of a pool of free 40S subunits; Formation of the ternary complex, and subsequently, the 43S complex; Ribosomal scanning and start codon recognition; Nonsense Mediated Decay (NMD) independent of the Exon Ju…	RpS4	0.979	1.9	1.859	0.995	1.87	0.998656	0.888938	0.994562	0.994447	0.992006	9.2	3.89	10.23	12.29
P49735	DNA replication licensing factor Mcm2	37	280	25	887	cell cycle OR cell proliferation;cell organization and biogenesis;DNA metabolism;other metabolic processes;stress response;other biological processes	nucleus;other cell component	nucleic acid binding activity;other molecular function	Assembly of the pre-replicative complex; Orc1 removal from chromatin; Activation of ATR in response to replication stress; Activation of the pre-replicative complex	Mcm2	2.203	1.467	3.233	1.103	2.932	6.62163e-06	0.988593	0.566151	0.939467	0.542395	87.44	38.36	52.26	50.05
Q9VMI3	NADH dehydrogenase [ubiquinone] flavoprotein 1, mitochondrial	59	1349	25	474	other metabolic processes;transport	other membranes;mitochondrion	transporter activity;other molecular function	Complex I biogenesis	ND-51	0.984	0.932	0.917	1.004	0.913	0.998656	0.991669	0.994562	0.994447	0.992006	8.95	14.53	4.42	8.8
Q9VLB7	Rab GDP dissociation inhibitor	57	1029	25	443	cell-cell signaling;transport;signal transduction	ER/Golgi;other cell component	enzyme regulator activity	Neutrophil degranulation; RAB GEFs exchange GTP for GDP on RABs	Gdi	0.995	1.492	1.484	1.063	1.396	0.998656	0.991669	0.994562	0.963131	0.992006	8.75	7.38	8.86	7.12
A0A0B4LGZ7	Uncharacterized protein, isoform H	45	482	25	619					Dmel\CG45076	1.037	0.789	0.818	0.984	0.831	0.998656	0.982739	0.994562	0.994447	0.992006	12.02	7.41	6.14	5.43
Q9VAN7	Phosphoglycerate mutase	75	1362	24	255	other metabolic processes	cytoskeleton	other molecular function	Neutrophil degranulation; Gluconeogenesis; Glycolysis	Pglym78	1.051	0.953	1.002	0.999	1.003	0.998656	0.991669	0.996106	0.994447	0.992006	10.26	10.5	6.46	10.91
Q9VP61	Acetyl-coenzyme A synthetase	50	820	24	670	other metabolic processes;other biological processes	other cell component	other molecular function	Ethanol oxidation	AcCoAS	0.805	0.926	0.745	0.979	0.761	0.23959	0.991669	0.994562	0.992474	0.992006	15.85	6.87	11	7.66
X2JKH9	HECT-type E3 ubiquitin transferase	7	76	24	5127	protein metabolism;DNA metabolism;other metabolic processes;stress response;transport;other biological processes	nucleus;other cell component	other molecular function		HUWE1	1.373	1.687	2.317	1.129	2.053	0.503641	0.965462	0.964289	0.939976	0.992006	29.41	35.83	34.69	42.46
Q7KMQ0	26S proteasome regulatory subunit 7	55	544	24	433	protein metabolism;other metabolic processes;other biological processes	cytosol;nucleus;other cell component	other molecular function	Neutrophil degranulation; Antigen processing: Ubiquitination & Proteasome degradation; Neddylation; Regulation of RAS by GAPs; ABC-family proteins mediated transport; Degradation of beta-catenin by the destruction complex; Ub-specific processing proteases; Activation of NF-kappaB in B cells; Oxygen-dependent proline hydroxylation of Hypoxia-inducible Factor Alpha; Cross-presentation of soluble ex…	Rpt1	1.133	1.516	1.718	1.074	1.599	0.844377	0.991669	0.994562	0.939976	0.992006	23.71	15.93	26.02	18.97
P91938	Thioredoxin reductase 1, mitochondrial	61	878	24	596	other biological processes	mitochondrion;other cell component	other molecular function	TP53 Regulates Metabolic Genes; Detoxification of Reactive Oxygen Species; Interconversion of nucleotide di- and triphosphates; Metabolism of ingested MeSeO2H into MeSeH	Trxr1	1.224	1.291	1.581	0.966	1.637	0.428348	0.991669	0.994562	0.963131	0.992006	26.53	23.64	16.54	11.24
M9PD08	Eukaryotic translation release factor 3, isoform C	47	438	24	495	cell organization and biogenesis;protein metabolism;other metabolic processes	other cell component	nucleic acid binding activity;other molecular function		eRF3	1.037	2.053	2.129	1.072	1.987	0.998656	0.810353	0.994562	0.964986	0.992006	8.62	11.67	19.36	19.17
A0A4P1SA55	Maltase B2, isoform E	57	478	24	583	other metabolic processes		other molecular function		Mal-B2	0.938	0.618	0.579	1.121	0.517	0.96253	0.809239	0.953431	0.80227	0.925908	4.51	15.84	11.09	11.12
Q9VMT5	Probable cytochrome P450 28d1	38	370	24	502		other membranes;ER/Golgi	other molecular function		Cyp28d1	0.839	1.898	1.593	1.437	1.109	0.506908	0.888938	0.994562	0.0139766	0.993518	11.43	19.68	20.42	23.5
P19889	60S acidic ribosomal protein P0	60	1130	24	317	cell organization and biogenesis;protein metabolism;DNA metabolism;other metabolic processes;stress response	cytosol;translational apparatus;nucleus	nucleic acid binding activity;other molecular function	Nonsense Mediated Decay (NMD) enhanced by the Exon Junction Complex (EJC); L13a-mediated translational silencing of Ceruloplasmin expression; Formation of a pool of free 40S subunits; Nonsense Mediated Decay (NMD) independent of the Exon Junction Complex (EJC); SRP-dependent cotranslational protein targeting to membrane; GTP hydrolysis and joining of the 60S ribosomal subunit	RpLP0	1.007	1.739	1.751	1.02	1.717	0.999039	0.939341	0.994562	0.994447	0.992006	8.36	9.28	15.1	10.47
X2J7U0	P-element induced wimpy testis, isoform B	34	271	24	843	other biological processes	other cell component	nucleic acid binding activity		piwi	1.171	1.125	1.317	0.877	1.501	0.914768	0.999685	0.996106	0.712073	0.992006	14.27	13.06	16.53	42.25
P52295	Importin subunit alpha	61	644	24	522	cell organization and biogenesis;transport;developmental processes;other biological processes	nucleus;other cell component	other molecular function	Sensing of DNA Double Strand Breaks	Pen	2.08	1.229	2.556	1.028	2.486	3.82469e-09	0.991669	0.938176	0.994447	0.858968	59.12	35.62	57.4	37.75
P29613	Triosephosphate isomerase	76	2157	24	247	other metabolic processes;other biological processes	cytosol;cytoskeleton	other molecular function	Gluconeogenesis; Glycolysis	Tpi	0.976	0.968	0.945	0.95	0.995	0.998656	0.991669	0.994562	0.936959	0.992006	2.18	7.02	6.1	4.51
A0A0B4LES3	Presequence protease, mitochondrial	29	298	24	1034	protein metabolism		other molecular function		Dmel\CG3107	1.309	1.092	1.43	0.972	1.472	0.17404	0.999685	0.994562	0.980943	0.992006	17.21	11.71	7.8	8.33
Q8IQV9	Nuclear pore complex protein Nup205	16	186	24	2090	cell organization and biogenesis;transport;other biological processes	nucleus	other molecular function	Transport of the SLBP independent Mature mRNA; Transport of the SLBP Dependant Mature mRNA; Transport of Mature mRNA Derived from an Intronless Transcript; Transport of Mature mRNA derived from an Intron-Containing Transcript; Nuclear Pore Complex (NPC) Disassembly; Regulation of HSF1-mediated heat shock response; SUMOylation of SUMOylation proteins; SUMOylation of chromatin organization proteins…	Nup205	1.267	1.363	1.727	1.168	1.479	0.619336	0.991669	0.994562	0.768952	0.992006	28.57	11.58	30.36	34.26
Q9Y105	Probable glutamine--tRNA ligase	35	309	24	778	cell organization and biogenesis;protein metabolism;RNA metabolism OR transcription;other metabolic processes;developmental processes	cytosol;other cell component	other molecular function		GlnRS	1.285	1.529	1.965	1.093	1.797	0.495009	0.988593	0.994562	0.936959	0.992006	26.89	22.31	23.45	17.64
P19109	ATP-dependent RNA helicase p62	45	617	24	719	RNA metabolism OR transcription;other metabolic processes;stress response;other biological processes	cytosol;nucleus;other cell component	nucleic acid binding activity;other molecular function		Rm62	0.888	1.734	1.541	0.986	1.563	0.715695	0.943317	0.994562	0.994447	0.992006	21.74	14.63	7.81	11.04
O62621	Coatomer subunit beta'	40	424	24	914	transport;other biological processes	other membranes;ER/Golgi	other molecular function	COPI-dependent Golgi-to-ER retrograde traffic; COPI-mediated anterograde transport	beta'COP	1.129	1.344	1.517	0.932	1.627	0.861015	0.991669	0.994562	0.897116	0.992006	15.35	17.28	14.29	8.58
Q02748	Eukaryotic initiation factor 4A	63	1195	24	403	protein metabolism;other metabolic processes;developmental processes;other biological processes	cytosol;translational apparatus;other cell component	nucleic acid binding activity;other molecular function	L13a-mediated translational silencing of Ceruloplasmin expression; Translation initiation complex formation; Ribosomal scanning and start codon recognition; Deadenylation of mRNA; ISG15 antiviral mechanism	eIF4A	1.197	1.484	1.777	1.048	1.695	0.546501	0.991669	0.994562	0.990871	0.992006	22.06	21.34	29.04	22.47
Q9VGW6	DNA replication licensing factor Mcm5	42	237	24	733	cell cycle OR cell proliferation;cell organization and biogenesis;DNA metabolism;other metabolic processes;stress response;other biological processes	cytosol;nucleus;other cell component	nucleic acid binding activity;other molecular function	Assembly of the pre-replicative complex; Orc1 removal from chromatin; Activation of ATR in response to replication stress; Activation of the pre-replicative complex	Mcm5	1.896	1.425	2.701	1.24	2.179	9.48765e-05	0.991669	0.86949	0.386959	0.992006	41.01	30.57	44.69	43.52
Q9W0A8	FI01658p	47	1029	24	277	cell organization and biogenesis;protein metabolism;other metabolic processes	cytosol;translational apparatus	nucleic acid binding activity;other molecular function	Nonsense Mediated Decay (NMD) enhanced by the Exon Junction Complex (EJC); L13a-mediated translational silencing of Ceruloplasmin expression; Formation of a pool of free 40S subunits; Nonsense Mediated Decay (NMD) independent of the Exon Junction Complex (EJC); SRP-dependent cotranslational protein targeting to membrane; GTP hydrolysis and joining of the 60S ribosomal subunit	RpL23A	0.954	1.615	1.542	0.816	1.89	0.998656	0.976218	0.994562	0.130543	0.992006	29.9	15.82	10.75	20.39
A1Z877	Nidogen	25	273	24	1350	cell adhesion;cell organization and biogenesis;developmental processes;other biological processes	non-structural extracellular;extracellular matrix	extracellular structural activity;other molecular function	Dectin-2 family; Termination of O-glycan biosynthesis	Ndg	0.941	0.942	0.887	1.084	0.818	0.982071	0.991669	0.994562	0.939467	0.992006	8.77	6.39	10.48	10.26
Q8INA9	Fasciclin 1, isoform C	43	766	24	655					Fas1	1.054	0.733	0.773	0.85	0.909	0.998656	0.946966	0.994562	0.324581	0.992006	10.53	12.81	11.02	4.91
Q9VLC5	Aldehyde dehydrogenase	49	1737	24	520	other metabolic processes;other biological processes	mitochondrion;other cell component	other molecular function	RA biosynthesis pathway; Fructose catabolism; Ethanol oxidation; Smooth Muscle Contraction; Metabolism of serotonin	Aldh	0.936	1.114	1.043	1.282	0.813	0.954286	0.999685	0.996106	0.0754341	0.992006	9.57	8.55	4.15	8.66
M9MRX4	Ankyrin 2, isoform U	3	138	24	13559	cell organization and biogenesis;developmental processes;signal transduction;other biological processes	plasma membrane;other membranes;cytoskeleton;other cell component			Ank2	0.883	0.903	0.797	1.012	0.788	0.882891	0.991669	0.994562	0.997064	0.992006	4.1	12.09	8.72	11.35
Q9VV46	Cuticular protein 72Ec	48	487	23	429	developmental processes	non-structural extracellular;extracellular matrix	other molecular function		Cpr72Ec	0.827	0.613	0.507	0.821	0.618	0.349951	0.835153	0.936866	0.151333	0.992006	18.51	17.33	7.41	8.97
Q94516	ATP synthase subunit b, mitochondrial	69	2004	23	243	other metabolic processes;transport	other membranes;mitochondrion	transporter activity	Formation of ATP by chemiosmotic coupling; Cristae formation	ATPsynB	0.938	0.861	0.808	1.022	0.79	0.956704	0.991669	0.994562	0.994447	0.992006	11.99	12.63	16.5	3.55
M9PG62	Regulatory particle non-ATPase 3, isoform B	43	550	23	494	other biological processes	other cell component	enzyme regulator activity		Rpn3	1.166	1.612	1.879	1.009	1.861	0.692637	0.976218	0.994562	0.999436	0.992006	25.66	8.06	23.16	19.35
Q7KWG9	Meiosis regulator and mRNA stability factor 1, isoform D	21	132	23	1305	other biological processes	cytosol;nucleus;other cytoplasmic organelle;other cell component	nucleic acid binding activity;other molecular function		Marf1	1.387	1.409	1.955	0.667	2.933	0.308466	0.991669	0.994562	0.0633451	0.42355	38.65	26.23	42.09	35.28
Q9VSA3	Probable medium-chain specific acyl-CoA dehydrogenase, mitochondrial	50	657	23	419	other metabolic processes	cytosol;mitochondrion;other cell component	other molecular function	Beta oxidation of decanoyl-CoA to octanoyl-CoA-CoA; Beta oxidation of octanoyl-CoA to hexanoyl-CoA; mitochondrial fatty acid beta-oxidation of unsaturated fatty acids	Mcad	0.991	1.123	1.113	1.035	1.075	0.998656	0.999685	0.997675	0.994447	0.996548	7.07	8.23	6.09	7.3
Q9VZ96	Axotactin, isoform I	17	211	23	2047						0.936	0.711	0.665	0.936	0.711	0.983502	0.835153	0.969822	0.936959	0.992006	16.48	11.42	19.17	11.98
Q0KIE7	Ankyrin, isoform B	22	278	23	1549	signal transduction;other biological processes	plasma membrane;other membranes;cytoskeleton;other cell component	cytoskeletal activity;other molecular function	Interaction between L1 and Ankyrins; COPI-mediated anterograde transport	Ank	1.184	0.926	1.096	0.952	1.152	0.89459	0.991669	0.996701	0.963131	0.999838	9.72	13.48	8.81	7.84
E1JJD6	Twenty-four, isoform F	22	239	23	1667	stress response;other biological processes				tyf	2.176	1.277	2.778	1.054	2.635	4.39e-05	0.991669	0.515912	0.994447	0.582746	61.92	40.57	52.02	62.61
Q9VKU1	Fatty acid transport protein 1, isoform A	48	474	23	626	other metabolic processes;transport;other biological processes	ER/Golgi	transporter activity;other molecular function		Fatp1	0.876	1.13	0.99	1.101	0.899	0.652866	0.999685	0.994562	0.888685	0.992006	21.47	11.79	2.91	8.24
Q9VUK8	Diadenosine tetraphosphate synthetase	40	456	23	765	cell organization and biogenesis;protein metabolism;RNA metabolism OR transcription;other metabolic processes;developmental processes	mitochondrion;other cell component	other molecular function		GlyRS	1.116	1.414	1.577	1.042	1.513	0.9158	0.991669	0.994562	0.994447	0.992006	17.06	12.69	18.88	15.48
Q9VCA5	Phenylalanine--tRNA ligase beta subunit	53	288	23	589	protein metabolism;RNA metabolism OR transcription;other metabolic processes	other cell component	nucleic acid binding activity;other molecular function		beta-PheRS	1.058	0.844	0.893	0.959	0.931	0.998656	0.991669	0.994562	0.951183	0.992006	17.9	4.66	12.24	13.16
Q9VCH5	Nuclear pore complex protein Nup98-Nup96	16	233	23	1960	cell organization and biogenesis;protein metabolism;stress response;transport;developmental processes;other biological processes	other membranes;nucleus;other cell component	nucleic acid binding activity;other molecular function	SUMOylation of SUMOylation proteins; SUMOylation of chromatin organization proteins; SUMOylation of DNA replication proteins; Regulation of HSF1-mediated heat shock response; Transport of the SLBP independent Mature mRNA; Transport of the SLBP Dependant Mature mRNA; Transport of Mature mRNA Derived from an Intronless Transcript; Transport of Mature mRNA derived from an Intron-Containing Transcrip…	Nup98-96	1.339	1.448	1.938	1.106	1.753	0.415347	0.991669	0.994562	0.936959	0.992006	29.63	19.47	29.4	27.58
A1Z9E3	Elongation factor Tu	64	941	23	489	protein metabolism;other metabolic processes		nucleic acid binding activity;other molecular function		mEFTu1	1.167	0.773	0.902	1.162	0.776	0.687131	0.974363	0.994562	0.572632	0.992006	13.3	14.01	20.91	20.68
A4V391	CCT-alpha	54	755	23	557	other biological processes		other molecular function		CCT1	1.113	2.076	2.31	1.047	2.206	0.928279	0.815586	0.964289	0.992295	0.968947	24.76	16.47	38.54	33.08
Q9VE75	V-type proton ATPase subunit a	30	559	23	834	transport;other biological processes	plasma membrane;other membranes;other cytoplasmic organelle	transporter activity;other molecular function	Neutrophil degranulation; ROS and RNS production in phagocytes; Insulin receptor recycling; Transferrin endocytosis and recycling; Amino acids regulate mTORC1; Ion channel transport	Vha100-2	1.043	0.868	0.905	1.041	0.87	0.998656	0.991669	0.994562	0.994447	0.992006	6.47	4.74	4.95	3.17
A0A0B4K7Z5	Regulatory particle non-ATPase 6, isoform C	58	509	23	422		other cell component			Rpn6	1.243	1.693	2.104	1.078	1.952	0.361422	0.9495	0.994562	0.936959	0.992006	20.82	14.06	27.11	24.31
Q9VM14	Dihydrolipoyllysine-residue acetyltransferase	38	1678	23	512	other metabolic processes;other biological processes	mitochondrion;other cell component	other molecular function	Glyoxylate metabolism and glycine degradation; Regulation of pyruvate dehydrogenase (PDH) complex; Signaling by Retinoic Acid	muc	0.843	0.935	0.788	0.968	0.814	0.439547	0.991669	0.994562	0.969803	0.992006	14.19	16.67	15.36	12.38
Q07171	Gelsolin	33	375	23	798	cell organization and biogenesis;other biological processes	non-structural extracellular;cytosol;cytoskeleton;other cell component	cytoskeletal activity;other molecular function	Neutrophil degranulation; Caspase-mediated cleavage of cytoskeletal proteins	Gel	0.837	0.822	0.688	0.991	0.694	0.495009	0.988593	0.994562	0.994447	0.992006	13.97	17.99	8.62	9.18
Q960Y8	Aluminum tubes, isoform G	33	214	23	874		other membranes;ER/Golgi			alt	1.308	1.506	1.97	0.971	2.028	0.371828	0.988593	0.994562	0.992422	0.992006	20.11	28.53	35.41	30.85
X2JCV2	Larval serum protein 2, isoform B	37	311	23	701		non-structural extracellular			Lsp2	1.046	1.199	1.255	1.531	0.82	0.998656	0.999685	0.997675	0.00295066	0.992006	67.85	77.27	45.17	114.94
Q9V463	Nuclear pore complex protein Nup154	26	161	23	1365	cell cycle OR cell proliferation;cell organization and biogenesis;transport;developmental processes;other biological processes	other membranes;cytosol;nucleus;other cell component	other molecular function	Transport of the SLBP independent Mature mRNA; Transport of the SLBP Dependant Mature mRNA; Transport of Mature mRNA Derived from an Intronless Transcript; Transport of Mature mRNA derived from an Intron-Containing Transcript; Nuclear Pore Complex (NPC) Disassembly; Regulation of HSF1-mediated heat shock response; SUMOylation of SUMOylation proteins; SUMOylation of chromatin organization proteins…	Nup154	1.48	0.84	1.243	0.842	1.476	0.190574	0.973991	0.997675	0.490926	0.992006	29.05	28.33	33.37	36.82
A1ZAW0	Dicer-2, isoform A	16	175	23	1722	cell organization and biogenesis;DNA metabolism;RNA metabolism OR transcription;other metabolic processes;stress response;transport;other biological processes	nucleus;other cell component	nucleic acid binding activity;other molecular function		Dcr-2	1.144	1.388	1.588	1.121	1.416	0.98153	0.991669	0.994562	0.932299	0.992006	9.87	10.58	19.37	13.38
Q9VYW4	LD04461p	32	284	23	901			other molecular function	ABC-family proteins mediated transport	Dmel\CG1703	1.03	1.956	2.016	1.054	1.911	0.999628	0.785499	0.994562	0.994447	0.992006	6.95	11.71	29.43	23
Q9V3U6	26-29kD-proteinase	50	959	23	549	protein metabolism;other metabolic processes	non-structural extracellular;other cytoplasmic organelle	other molecular function		26-29-p	2.414	1.11	2.68	1.152	2.325	2.39563e-13	0.999685	0.900717	0.632475	0.944817	61.72	37.49	47.18	40.33
Q9V4E0	Complex I-49kD	63	875	23	468	other metabolic processes;transport	other membranes;mitochondrion	transporter activity;other molecular function	Complex I biogenesis	ND-49	1.069	0.784	0.839	0.988	0.849	0.998656	0.980994	0.994562	0.994447	0.992006	15.65	3.95	11.15	11.81
Q9VDK7	Signal recognition particle subunit SRP72	46	189	22	650	transport	ER/Golgi;translational apparatus	nucleic acid binding activity	SRP-dependent cotranslational protein targeting to membrane	Srp72	1.073	1.822	1.954	1.144	1.707	0.998656	0.835153	0.994562	0.861619	0.992006	7.67	9.65	28.87	24.45
Q9VWH7	6-phosphofructo-2-kinase	41	282	22	716	other metabolic processes	cytosol;other cell component	kinase activity;other molecular function	Regulation of glycolysis by fructose 2,6-bisphosphate metabolism	Pfrx	0.937	0.63	0.59	0.974	0.606	0.983502	0.686881	0.86949	0.992295	0.968262	15.88	14.09	16.08	7.36
Q9W457	Serine hydroxymethyltransferase	47	381	22	537	cell organization and biogenesis;other metabolic processes;other biological processes	cytosol;nucleus;other cell component	nucleic acid binding activity;other molecular function	Metabolism of folate and pterines; Carnitine synthesis	Shmt	0.961	2.603	2.5	1.173	2.132	0.998656	0.533891	0.951763	0.503621	0.992006	9.17	17.38	22.98	28.93
A0A0B4LEV2	DNA helicase	38	237	22	866	cell organization and biogenesis;DNA metabolism;other metabolic processes	nucleus;other cell component	nucleic acid binding activity;other molecular function		dpa	1.731	1.636	2.832	1.299	2.18	0.0101576	0.934462	0.737755	0.346098	0.976284	47.71	31.15	50.94	32.08
Q9VUY9	Phosphoglucomutase	60	887	22	560	other metabolic processes	cytosol	other molecular function	Neutrophil degranulation; Glycogen synthesis; Glycogen breakdown (glycogenolysis); Galactose catabolism	Pgm1	0.985	0.838	0.825	0.919	0.898	0.998656	0.991669	0.994562	0.826591	0.992006	6.08	11.28	16.25	18.12
A1Z7H3	Acyl-CoA synthetase long-chain, isoform C	39	786	22	707	cell-cell signaling;cell organization and biogenesis;other metabolic processes;developmental processes;other biological processes	ER/Golgi;other cell component	other molecular function		Acsl	1.027	0.925	0.95	1.004	0.946	0.998656	0.991669	0.994562	0.994447	0.992006	7.52	6.34	8.07	9.03
P40796	La protein homolog	48	322	22	390	RNA metabolism OR transcription;other metabolic processes	nucleus;other cell component	nucleic acid binding activity		La	1.039	1.472	1.53	0.961	1.592	0.998656	0.991669	0.994562	0.957957	0.992006	6.87	9.71	14.73	20.66
X2JEB6	Imaginal disc growth factor 4, isoform C	44	664	22	442	other metabolic processes	non-structural extracellular	other molecular function		Idgf4	0.983	0.88	0.865	1.065	0.813	0.998656	0.991669	0.994562	0.962284	0.992006	10.17	11.07	7.63	8.29
A0A0B4KHY8	Uncharacterized protein, isoform C	22	244	22	1379	protein metabolism;DNA metabolism;other metabolic processes;stress response	nucleus;other cell component	other molecular function		BcDNA:LD22087	1.416	1.827	2.587	0.792	3.267	0.219847	0.877896	0.899702	0.248682	0.382858	44.63	26.64	45.94	53.37
Q9VQE0	Dynamin-1-like protein	38	286	22	735	cell organization and biogenesis;developmental processes;other biological processes	plasma membrane;other membranes;cytosol;cytoskeleton;mitochondrion;ER/Golgi;other cytoplasmic organelle;other cell component	cytoskeletal activity;other molecular function	Apoptotic execution phase	Drp1	1.316	0.754	0.993	0.855	1.16	0.296397	0.932889	0.994562	0.495287	0.999838	15.55	13.05	21.76	20.38
A0A0B4KGX1	Jaguar, isoform L	21	304	22	1268		cytoskeleton;other cell component	cytoskeletal activity;other molecular function		jar	0.985	1.293	1.273	0.971	1.312	0.998656	0.991669	0.996701	0.989454	0.992006	15.13	7.01	10.42	11.59
P55830	40S ribosomal protein S3a	71	1529	22	268	protein metabolism;other metabolic processes;other biological processes	cytosol;translational apparatus	other molecular function	L13a-mediated translational silencing of Ceruloplasmin expression; Translation initiation complex formation; Formation of a pool of free 40S subunits; Formation of the ternary complex, and subsequently, the 43S complex; Ribosomal scanning and start codon recognition; Nonsense Mediated Decay (NMD) enhanced by the Exon Junction Complex (EJC); Major pathway of rRNA processing in the nucleolus and cy…	RpS3A	0.975	2.181	2.126	1.09	1.95	0.998656	0.770896	0.994562	0.931101	0.992006	6.61	13.36	18.05	19.56
Q8T4G5	SD01613p	33	322	22	826	protein metabolism;other metabolic processes	other membranes;mitochondrion	other molecular function	Processing of SMDT1	Afg3l2	1.051	0.928	0.975	0.952	1.025	0.998656	0.991669	0.994562	0.936959	0.992762	13.31	9.5	9.18	11.75
Q9W0H6	Uncharacterized protein	63	316	22	392	other metabolic processes	mitochondrion;other cytoplasmic organelle	other molecular function	Cholesterol biosynthesis	Acat2	1.249	0.957	1.195	0.989	1.208	0.495877	0.991669	0.999991	0.994447	0.993959	20.91	15.52	11.19	7.32
Q9VV60	Tyrosine--tRNA ligase	47	270	22	525	protein metabolism;RNA metabolism OR transcription;other metabolic processes	nucleus;other cell component	nucleic acid binding activity;other molecular function		TyrRS	1.011	1.46	1.476	1.01	1.461	0.999628	0.991669	0.994562	0.999871	0.992006	5.74	9.23	11.31	0.89
Q94522	Succinate--CoA ligase [ADP/GDP-forming] subunit alpha, mitochondrial	51	1291	22	328	other metabolic processes	other cell component	other molecular function	Citric acid cycle (TCA cycle)	Scsalpha1	0.859	0.849	0.73	0.946	0.771	0.537544	0.991669	0.994562	0.93159	0.992006	10.82	16.62	20.56	17.51
P54611	V-type proton ATPase subunit E	77	989	22	226	transport;developmental processes;other biological processes	plasma membrane;other membranes;other cytoplasmic organelle	transporter activity	ROS and RNS production in phagocytes; Insulin receptor recycling; Transferrin endocytosis and recycling; Amino acids regulate mTORC1; Ion channel transport	Vha26	1.003	0.913	0.916	0.993	0.923	0.998656	0.991669	0.994562	0.994447	0.992006	9.58	7.49	2.69	3.51
E2QCG7	Eukaryotic translation initiation factor 3 subunit B	38	446	22	690	cell organization and biogenesis;protein metabolism;other metabolic processes	translational apparatus;other cell component	nucleic acid binding activity;other molecular function		eIF3b	1.021	1.798	1.836	0.999	1.838	0.999628	0.926861	0.994562	0.994447	0.992006	13.79	14.76	22.8	19.13
Q9VXR5	LD02975p	42	368	22	611			other molecular function		Dmel\CG9281	1.099	1.827	2.009	1.09	1.842	0.998656	0.903432	0.994562	0.939976	0.992006	13.23	13.13	25.11	14.51
A0A0B4LHL7	ATP synthase subunit d, mitochondrial	98	1590	22	178	other metabolic processes;transport	other membranes;mitochondrion	transporter activity		ATPsynD	0.994	0.822	0.817	1.009	0.809	0.998656	0.989457	0.994562	0.999219	0.992006	6.09	4.42	6.09	4.15
Q8INP9	RE51612p	63	376	21	359		nucleus;other cell component			Dmel\CG11980	1.088	1.25	1.36	0.959	1.418	0.983502	0.991669	0.994562	0.953021	0.992006	9.85	63.97	11.9	7.97
P91927	Mitochondrial proton/calcium exchanger protein	29	312	21	1013	cell-cell signaling;cell organization and biogenesis;stress response;transport	other membranes;mitochondrion;other cell component	transporter activity;translation activity;other molecular function		Letm1	1.052	1.258	1.324	1.202	1.102	0.998656	0.991669	0.996106	0.526466	0.993518	7.67	13.33	8.37	11.51
Q9W3N9	LD24105p	64	479	21	410	other metabolic processes	other cytoplasmic organelle	other molecular function	Branched-chain amino acid catabolism; Synthesis of Ketone Bodies; Utilization of Ketone Bodies	Acat1	1.065	1.129	1.203	0.997	1.206	0.998656	0.999685	0.997675	0.994447	0.992762	20.4	14.71	16.59	14.27
P19107	Phosrestin-1	54	494	21	401	transport;signal transduction;other biological processes	ER/Golgi;other cell component	signal transduction activity or receptor binding;other molecular function	Golgi Associated Vesicle Biogenesis; Cargo recognition for clathrin-mediated endocytosis; Ub-specific processing proteases; Lysosome Vesicle Biogenesis; G alpha (s) signalling events; MAP2K and MAPK activation; Thrombin signalling through proteinase activated receptors (PARs)	Arr2	0.903	0.732	0.661	0.725	0.912	0.812076	0.946966	0.994562	0.00207838	0.992006	8.38	10.74	7.48	14.1
P12646	Glucose-6-phosphate 1-dehydrogenase	53	394	21	524	other metabolic processes	cytosol	other molecular function	Pentose phosphate pathway; TP53 Regulates Metabolic Genes	Zw	1.057	1.129	1.194	0.954	1.251	0.998656	0.999745	0.9983	0.950889	0.992762	8.95	9.73	3.52	9.95
Q9W543	Rabconnectin-3B, isoform A	19	186	21	1525	developmental processes;other biological processes	other cell component			Rbcn-3B	0.966	0.999	0.965	1.011	0.955	0.998656	0.991669	0.994562	0.999871	0.992006	9.93	6.77	7.22	8.19
Q9VTP4	60S ribosomal protein L10a-2	70	1108	21	217	protein metabolism;RNA metabolism OR transcription;other metabolic processes	cytosol;translational apparatus	nucleic acid binding activity;other molecular function	Nonsense Mediated Decay (NMD) enhanced by the Exon Junction Complex (EJC); L13a-mediated translational silencing of Ceruloplasmin expression; Formation of a pool of free 40S subunits; Nonsense Mediated Decay (NMD) independent of the Exon Junction Complex (EJC); SRP-dependent cotranslational protein targeting to membrane; GTP hydrolysis and joining of the 60S ribosomal subunit	RpL10Ab	0.973	2.169	2.111	1.122	1.881	0.998656	0.776221	0.994562	0.800567	0.992006	10.45	6.85	14.48	14.54
Q9VLN6	FI20146p1	25	317	21	1355	transport	other membranes	transporter activity;other molecular function	Platelet degranulation ; Paracetamol ADME; ABC-family proteins mediated transport; Cargo recognition for clathrin-mediated endocytosis; Aggrephagy; Azathioprine ADME	Dme_CG7627	1.468	1.043	1.531	0.841	1.82	0.176512	0.991669	0.994562	0.525333	0.992006	37.92	16.28	31.71	24.61
A0A0B4K620	Mustard, isoform V	24	252	21	1344	stress response;other biological processes	nucleus;other cell component			mtd	1.145	1.041	1.192	0.959	1.243	0.981583	0.991669	0.999392	0.970532	0.993518	31.58	23.98	16.64	14.46
X2JAF4	Fasciclin 2, isoform G	32	243	21	885	cell adhesion;other biological processes	other membranes			Fas2	1.009	1.028	1.038	1.039	0.999	0.998656	0.991669	0.994562	0.994447	0.992006	6.67	11.06	13.91	13.65
Q24253	AP complex subunit beta	31	284	21	921	transport;developmental processes;other biological processes	plasma membrane;other membranes;ER/Golgi;other cell component	other molecular function	WNT5A-dependent internalization of FZD4; Golgi Associated Vesicle Biogenesis; VLDLR internalisation and degradation; Cargo recognition for clathrin-mediated endocytosis; LDL clearance; Recycling pathway of L1; Retrograde neurotrophin signalling; Lysosome Vesicle Biogenesis; Trafficking of GluR2-containing AMPA receptors; EPH-ephrin mediated repulsion of cells; WNT5A-dependent internalization of F…	AP-1-2beta	0.993	1.172	1.164	1.041	1.118	0.998656	0.999685	0.997675	0.994447	0.993518	19.8	9.69	8.14	7.04
P14318	Muscle-specific protein 20	82	941	21	184	other biological processes	cytoskeleton		Neutrophil degranulation; Platelet degranulation	Mp20	0.935	0.789	0.738	0.87	0.848	0.954286	0.982739	0.994562	0.470961	0.992006	10.88	6.9	11.49	7.42
Q03427	Lamin-C	41	454	21	621	cell cycle OR cell proliferation;cell organization and biogenesis;transport;other biological processes	cytoskeleton;nucleus;other cell component	cytoskeletal activity	Depolymerisation of the Nuclear Lamina; RHOD GTPase cycle; RHOF GTPase cycle; Breakdown of the nuclear lamina	LamC	1.022	0.956	0.977	0.95	1.029	0.999628	0.991669	0.994562	0.936959	0.992762	8.92	10.19	7.44	4.05
P04052	DNA-directed RNA polymerase II subunit RPB1	15	154	21	1887	RNA metabolism OR transcription;other metabolic processes	nucleus;other cell component	nucleic acid binding activity;other molecular function	mRNA Splicing - Major Pathway; Processing of Capped Intron-Containing Pre-mRNA; mRNA Splicing - Minor Pathway; RNA polymerase II transcribes snRNA genes; Formation of TC-NER Pre-Incision Complex; Dual incision in TC-NER; Gap-filling DNA repair synthesis and ligation in TC-NER; Formation of RNA Pol II elongation complex ; RNA Polymerase II Pre-transcription Events; Formation of the Early Elongatio…	RpII215	0.792	1.871	1.482	1.029	1.44	0.407958	0.774341	0.994562	0.994447	0.992006	16.36	21.96	15.15	15.78
X2JAF1	Lava lamp, isoform D	12	164	21	2779					lva	1.01	0.822	0.831	0.777	1.07	0.998656	0.988593	0.994562	0.0349591	0.993518	31.82	11.11	28.8	10.83
Q9VEX6	ATPase family AAA domain-containing protein 3A homolog	43	345	21	604	cell organization and biogenesis	other membranes;mitochondrion	other molecular function	Neutrophil degranulation	bor	0.948	1.172	1.111	0.978	1.136	0.983502	0.999685	0.996106	0.994447	0.997929	3.49	3.27	9.07	9.14
Q9W347	C12.2, isoform A	20	195	21	1386		other cell component	other molecular function		c12.2	0.888	1.13	1.003	1.103	0.909	0.843372	0.999685	0.994562	0.936959	0.992006	9.89	19.32	11.73	10.97
Q9VSD6	D-Importin 7/RanBP7	26	462	21	1049	cell organization and biogenesis;transport;developmental processes;other biological processes	cytosol;nucleus;other cell component	nucleic acid binding activity;other molecular function	Transcriptional regulation by small RNAs	msk	1.006	1.075	1.081	1.114	0.971	0.998656	0.999685	0.996106	0.833515	0.992006	8.95	7.72	23.78	21.32
Q9VXN4	Probable arginine--tRNA ligase, cytoplasmic	40	276	21	665	protein metabolism;RNA metabolism OR transcription;other metabolic processes	cytosol;other cell component	other molecular function		ArgRS	1.049	1.326	1.391	1.103	1.261	0.998656	0.991669	0.994562	0.88642	0.992006	9.45	10.25	18.09	14.06
P92177	14-3-3 protein epsilon	74	1398	21	262	cell organization and biogenesis;stress response;developmental processes;signal transduction;other biological processes	cytosol;nucleus;other cell component	other molecular function	Signaling by Hippo; Regulation of HSF1-mediated heat shock response; RAB GEFs exchange GTP for GDP on RABs; TP53 Regulates Metabolic Genes; RHO GTPases activate PKNs; HSF1 activation; Chk1/Chk2(Cds1) mediated inactivation of Cyclin B:Cdk1 complex; Phosphorylation of PER and TIM; Phosphorylation-dependent inhibition of YKI	14-3-3epsilon	0.973	1.199	1.167	0.886	1.316	0.998656	0.99616	0.9983	0.601954	0.992006	17.82	14.94	19.68	12.89
P91929	NADH dehydrogenase [ubiquinone] 1 alpha subcomplex subunit 10, mitochondrial	55	669	21	407	other metabolic processes	other membranes;mitochondrion;other cell component		Complex I biogenesis	ND-42	1.034	0.81	0.838	1.023	0.819	0.998656	0.988593	0.994562	0.994447	0.992006	6.78	4.96	11.33	6.93
A1Z6L9	FI21274p1	38	367	21	691	stress response;other biological processes	non-structural extracellular;other membranes;mitochondrion;nucleus	nucleic acid binding activity;other molecular function		Trap1	1.025	1.22	1.25	1.089	1.148	0.999628	0.99616	0.997675	0.938207	0.999203	8.57	6.36	13.01	2.52
M9PD18	H(+)-transporting two-sector ATPase	70	2243	21	614	other metabolic processes;transport	other membranes	transporter activity;other molecular function		Vha68-1	0.899	0.741	0.667	0.896	0.744	0.78918	0.953225	0.994562	0.686899	0.992006	13.39	15.19	15.49	8.19
E1JGL8	Uncharacterized protein, isoform C	21	253	20	1272	RNA metabolism OR transcription;other metabolic processes			mRNA Splicing - Major Pathway; Processing of Capped Intron-Containing Pre-mRNA	Dmel\CG30122	1.267	1.275	1.616	0.957	1.689	0.605946	0.991669	0.994562	0.969803	0.992006	21.83	11.39	17.96	14.46
Q9VYR1	Regucalcin homologue	80	839	20	303	other metabolic processes		other molecular function		regucalcin	1.063	1.128	1.199	0.977	1.228	0.998656	0.999685	0.996921	0.988285	0.992006	8.94	6.94	15.77	10.26
Q9VA91	40S ribosomal protein S7	78	818	20	194	protein metabolism;RNA metabolism OR transcription;other metabolic processes;other biological processes	cytosol;translational apparatus;other cell component	other molecular function	Nonsense Mediated Decay (NMD) enhanced by the Exon Junction Complex (EJC); Major pathway of rRNA processing in the nucleolus and cytosol; L13a-mediated translational silencing of Ceruloplasmin expression; Translation initiation complex formation; Formation of a pool of free 40S subunits; Formation of the ternary complex, and subsequently, the 43S complex; Ribosomal scanning and start codon recogn…	RpS7	1.138	1.546	1.759	0.925	1.901	0.827276	0.988593	0.994562	0.855032	0.992006	15.51	16.21	27.64	28.65
Q9VYV3	Thioredoxin domain-containing protein 5 homolog	50	224	20	416	transport;other biological processes	ER/Golgi;other cell component	other molecular function	Lysosome Vesicle Biogenesis; Neutrophil degranulation	prtp	1	1.305	1.306	1.136	1.15	0.998656	0.991669	0.996106	0.774271	0.999838	11.89	8.75	17.32	12.13
A8JV22	Bleomycin hydrolase	40	423	20	511	protein metabolism;other metabolic processes;other biological processes	other cell component	other molecular function		Dmel\CG1440	1.152	1.358	1.564	1.089	1.435	0.749836	0.991669	0.994562	0.931101	0.992006	14.22	6.46	15.6	11.33
P35600	Replication factor C subunit 1	25	182	20	986	cell organization and biogenesis;DNA metabolism;other metabolic processes;stress response;developmental processes	nucleus;other cell component	nucleic acid binding activity;other molecular function	Dual incision in TC-NER; Gap-filling DNA repair synthesis and ligation in TC-NER; Dual Incision in GG-NER; Translesion synthesis by REV1; Recognition of DNA damage by PCNA-containing replication complex; Translesion Synthesis by POLH; Translesion synthesis by POLK; Translesion synthesis by POLI; PCNA-Dependent Long Patch Base Excision Repair; Termination of translesion DNA synthesis; Polymerase s…	Gnf1	1.844	1.595	2.941	1.131	2.601	0.00396022	0.955998	0.445989	0.931101	0.604456	47.09	28.82	41.04	32.94
Q0E8E8	MIP08013p1	71	2492	20	356	transport;developmental processes	other membranes;mitochondrion	transporter activity		Mpcp2	1.022	1.061	1.085	1.078	1.006	0.999501	0.997109	0.996921	0.936959	0.992006	10.29	2.29	3.09	4.34
A0A0B4K6N1	40S ribosomal protein S8	65	919	20	208	protein metabolism;other metabolic processes	translational apparatus;other cell component	other molecular function		RpS8	1.028	1.807	1.857	0.939	1.978	0.998656	0.917785	0.994562	0.927844	0.992006	9.06	12.51	11.31	14.73
Q8MSI2	GH15296p	72	3016	20	189		ER/Golgi	other molecular function		Scp1	0.933	0.69	0.644	0.918	0.702	0.950637	0.915095	0.994562	0.818807	0.992006	13.47	21.25	8.55	10.47
Q9VCV4	Citrate hydro-lyase	44	622	20	902	other metabolic processes;developmental processes;other biological processes	cytosol;mitochondrion;nucleus	nucleic acid binding activity;other molecular function	Iron uptake and transport	Irp-1A	1.002	0.936	0.938	1.069	0.877	0.998656	0.991669	0.994562	0.974983	0.992006	13.86	9.87	15.99	13.79
Q24492	Replication protein A 70 kDa DNA-binding subunit	45	332	20	603	cell cycle OR cell proliferation;cell organization and biogenesis;DNA metabolism;other metabolic processes;stress response	nucleus	nucleic acid binding activity;other molecular function		RpA-70	1.831	1.448	2.652	1.016	2.609	0.000719726	0.991669	0.863105	0.999436	0.804443	52.11	39.8	39.97	64.29
O44081	H/ACA ribonucleoprotein complex subunit 4	40	446	20	508	RNA metabolism OR transcription;other metabolic processes;other biological processes	nucleus	nucleic acid binding activity;other molecular function	Telomere Extension By Telomerase	Nop60B	1.007	1.426	1.436	1.037	1.384	0.999039	0.991669	0.994562	0.994447	0.992006	17.9	8.33	4.59	5
P41572	6-phosphogluconate dehydrogenase, decarboxylating	58	829	20	481	other metabolic processes;other biological processes	cytosol	other molecular function	Pentose phosphate pathway	Pgd	1.131	1.448	1.637	1.172	1.398	0.852288	0.991669	0.994562	0.512249	0.992006	9.4	12.52	11.57	11.63
O18640	Guanine nucleotide-binding protein subunit beta-like protein	88	1348	20	318	cell organization and biogenesis;protein metabolism;other metabolic processes;stress response;developmental processes;other biological processes	cytosol;translational apparatus;nucleus;other cytoplasmic organelle;other cell component	translation activity;other molecular function	Regulation of TNFR1 signaling	Rack1	1.022	1.9	1.942	1.025	1.894	0.999628	0.888938	0.994562	0.994447	0.992006	6.68	9.73	18.13	16.96
Q9VK69	T-complex protein 1 subunit delta	49	537	20	533	other biological processes	cytosol	other molecular function	Cooperation of PDCL (PhLP1) and TRiC/CCT in G-protein beta folding; Association of TriC/CCT with target proteins during biosynthesis	CCT4	1.263	1.534	1.937	1.08	1.793	0.294111	0.988593	0.994562	0.93521	0.992006	23.29	16.38	33.81	21.21
Q9VWV5	Uncharacterized protein, isoform G	32	383	20	709	other metabolic processes	cytosol	other molecular function	Ribavirin ADME; Purine catabolism; Abacavir metabolism	Nt5b	0.987	1.046	1.032	0.98	1.054	0.998656	0.99616	0.996106	0.992936	0.993518	5.46	8.43	9.38	8.92
Q9VKZ8	Ubiquitin carboxyl-terminal hydrolase	63	332	20	475	protein metabolism;other metabolic processes;other biological processes	cytosol;nucleus	other molecular function	Ub-specific processing proteases; Ubiquitination and proteolysis of phosphorylated CI; Degradation of NF-kappa-B inhibitor, CACT; Ubiquitination and degradation of phosphorylated ARM; Nuclear CI is degraded; Degradation of TIM; Degradation of PER; Degradation of CRY	Usp14	1.496	1.18	1.766	1.022	1.727	0.0576322	0.999685	0.994562	0.994941	0.992006	40.36	26.11	33.93	22.43
Q9XYZ5	DNA damage-binding protein 1	25	217	20	1140	cell organization and biogenesis;protein metabolism;DNA metabolism;other metabolic processes;stress response;other biological processes	nucleus;other cell component	nucleic acid binding activity	DNA Damage Recognition in GG-NER; Formation of Incision Complex in GG-NER; Neddylation; Formation of TC-NER Pre-Incision Complex; Dual incision in TC-NER; Gap-filling DNA repair synthesis and ligation in TC-NER; Dual Incision in GG-NER; Recognition of DNA damage by PCNA-containing replication complex	pic	1.073	0.927	0.995	0.902	1.102	0.998656	0.991669	0.994562	0.724922	0.999391	5.28	10.89	14.29	12.21
P18432	Myosin regulatory light chain 2	72	1859	20	222	cell organization and biogenesis;developmental processes;other biological processes	cytoskeleton;other cell component	cytoskeletal activity;other molecular function	Smooth Muscle Contraction; RHO GTPases activate PAKs	Mlc2	1.053	0.726	0.765	1.03	0.743	0.998656	0.945683	0.994562	0.994447	0.992006	4.78	13.81	12.82	13.79
Q7KVX1	Pyruvate dehydrogenase E1 component subunit alpha	57	900	20	443	other metabolic processes	mitochondrion	other molecular function	Glyoxylate metabolism and glycine degradation; Regulation of pyruvate dehydrogenase (PDH) complex; Signaling by Retinoic Acid	Pdha	1.111	0.747	0.83	1.062	0.782	0.931214	0.96218	0.994562	0.963131	0.992006	11.81	15	15.79	9.05
Q9V3V6	26S proteasome regulatory complex subunit p50	55	608	20	428	protein metabolism;other metabolic processes;other biological processes	cytosol;nucleus;other cell component	other molecular function	Neutrophil degranulation; Antigen processing: Ubiquitination & Proteasome degradation; Neddylation; Regulation of RAS by GAPs; ABC-family proteins mediated transport; Degradation of beta-catenin by the destruction complex; Ub-specific processing proteases; Activation of NF-kappaB in B cells; Oxygen-dependent proline hydroxylation of Hypoxia-inducible Factor Alpha; Cross-presentation of soluble ex…	Rpt5	1.504	1.291	1.941	1.071	1.812	0.0156019	0.991669	0.994562	0.963131	0.992006	34.24	25.36	34.41	29.15
Q9V405	26S proteasome regulatory complex subunit p48A	54	507	20	413	cell cycle OR cell proliferation;protein metabolism;other metabolic processes;other biological processes	cytosol;nucleus;other cell component	other molecular function	ABC-family proteins mediated transport; Antigen processing: Ubiquitination & Proteasome degradation; Neddylation; Regulation of RAS by GAPs; Degradation of beta-catenin by the destruction complex; Ub-specific processing proteases; Activation of NF-kappaB in B cells; Oxygen-dependent proline hydroxylation of Hypoxia-inducible Factor Alpha; Cross-presentation of soluble exogenous antigens (endosome…	Rpt3	1.46	1.321	1.929	1.024	1.884	0.0153461	0.991669	0.994562	0.994447	0.992006	35.92	21.2	25.01	19.86
P25171	Regulator of chromosome condensation	57	308	20	547	cell cycle OR cell proliferation;transport;developmental processes;other biological processes	nucleus;other cell component	enzyme regulator activity;other molecular function	Postmitotic nuclear pore complex (NPC) reformation	Rcc1	0.762	1.363	1.039	0.928	1.12	0.150037	0.991669	0.994562	0.931101	0.993518	24.15	19.1	11.73	11.4
P29327	40S ribosomal protein S6	47	983	20	248	protein metabolism;other metabolic processes	cytosol;translational apparatus	other molecular function	Nonsense Mediated Decay (NMD) enhanced by the Exon Junction Complex (EJC); Major pathway of rRNA processing in the nucleolus and cytosol; L13a-mediated translational silencing of Ceruloplasmin expression; Translation initiation complex formation; Formation of a pool of free 40S subunits; Formation of the ternary complex, and subsequently, the 43S complex; Ribosomal scanning and start codon recogn…	RpS6	1.035	2.185	2.261	0.981	2.304	0.998656	0.769034	0.968402	0.994447	0.962883	4.37	11.34	16.38	13.08
A1ZAA5	Aspartate transaminase	45	461	20	437	other metabolic processes	other cytoplasmic organelle	other molecular function	Gluconeogenesis; Aspartate and asparagine metabolism	Got1	1.111	1.117	1.241	1.032	1.203	0.931328	0.999685	0.996106	0.994447	0.993518	10.76	10.13	18.85	11.32
Q5U124	LP11544p	38	283	20	630	other metabolic processes		other molecular function		Mal-A5	1.274	1.432	1.824	1.153	1.581	0.403397	0.991669	0.994562	0.800567	0.992006	21.53	12.93	17.99	10.37
Q9VSS1	Protein Pixie	42	255	20	611	cell organization and biogenesis;protein metabolism;RNA metabolism OR transcription;other metabolic processes;transport;other biological processes	cytosol;other cell component	translation activity;other molecular function		pix	0.932	2.231	2.078	1.022	2.034	0.947593	0.717959	0.994562	0.994447	0.992006	13.34	14.74	14.04	11.79
Q9W327	Lysine--tRNA ligase	32	306	20	607	protein metabolism;RNA metabolism OR transcription;other metabolic processes	cytosol;mitochondrion;other cell component	nucleic acid binding activity;other molecular function		LysRS	1.212	1.65	1.999	0.963	2.076	0.638455	0.969321	0.994562	0.97686	0.992006	23.96	17.52	29.85	27.74
Q95WY3	FI04781p	45	355	20	496	RNA metabolism OR transcription;other metabolic processes	nucleus;other cell component	nucleic acid binding activity	Major pathway of rRNA processing in the nucleolus and cytosol	Nop56	0.913	1.4	1.278	0.931	1.372	0.861015	0.991669	0.996106	0.888996	0.992006	16.26	13.03	8.82	12.66
M9PD14	Flightin, isoform B	82	1047	20	182					fln	0.889	0.78	0.693	0.911	0.761	0.717447	0.979739	0.994562	0.786867	0.992006	13.46	16.65	14.33	10.67
Q9VMR6	MIP06029p	44	197	20	593	other metabolic processes	other cytoplasmic organelle	other molecular function	Mitochondrial Fatty Acid Beta-Oxidation	Acsf2	1.039	0.896	0.931	1.286	0.724	0.999628	0.991669	0.994562	0.232539	0.992006	7.91	7.76	14.84	10.52
P13496	Dynactin subunit 1	24	167	20	1265	cell-cell signaling;cell cycle OR cell proliferation;cell organization and biogenesis;other metabolic processes;stress response;transport;developmental processes;other biological processes	cytoskeleton;nucleus;other cell component	cytoskeletal activity;other molecular function		DCTN1-p150	1.114	1.061	1.181	0.964	1.225	0.998656	0.99616	0.997675	0.988285	0.992006	20.83	16.6	31.04	15.86
Q9W1H4	DNA ligase 1	35	140	20	747	cell cycle OR cell proliferation;DNA metabolism;other metabolic processes;stress response;other biological processes	mitochondrion;nucleus;other cell component	nucleic acid binding activity;other molecular function	Processive synthesis on the lagging strand; Mismatch repair (MMR) directed by MSH2:MSH6 (MutSalpha); Gap-filling DNA repair synthesis and ligation in TC-NER; PCNA-Dependent Long Patch Base Excision Repair; Mismatch repair (MMR) directed by MSH2:MSH3 (MutSbeta)	DNAlig1	1.57	2.072	3.253	1.333	2.44	0.062123	0.782552	0.407103	0.322202	0.64354	55.09	37.81	43.19	36.52
O18388	Importin subunit beta	31	284	19	884	transport;other biological processes	nucleus;other cell component	other molecular function	Neutrophil degranulation; Apoptosis induced DNA fragmentation; Regulation of cholesterol biosynthesis by SREBP (SREBF); Assembly of the ORC complex at the origin of replication; Interferon alpha/beta signaling	Fs(2)Ket	1.874	1.125	2.109	0.888	2.375	3.35145e-05	0.997109	0.994164	0.775035	0.968262	46.09	35.43	44.2	26.98
A0A0B4KEX6	Jitterbug, isoform M	10	153	19	2839	cell organization and biogenesis;developmental processes;other biological processes	other cell component	cytoskeletal activity		jbug	0.884	0.759	0.671	0.922	0.728	0.897272	0.936111	0.964289	0.931101	0.992006	13.04	19.21	13.12	11.26
Q9I7D3	Caprin homolog	21	283	19	961	developmental processes;other biological processes	other cell component	nucleic acid binding activity		Capr	1.022	0.76	0.777	0.934	0.831	0.999628	0.972324	0.994562	0.908346	0.992006	12.53	12.89	11.8	17.45
I0DHK3	Proteasome subunit alpha type	77	548	19	279	protein metabolism;other metabolic processes	nucleus;other cell component	other molecular function		Prosalpha6	1.364	1.117	1.524	0.92	1.658	0.0764125	0.999685	0.994562	0.831281	0.992006	31.97	20.3	21.77	22.07
Q9VC57	Atlastin	43	295	19	541	cell organization and biogenesis;developmental processes;other biological processes	other membranes;ER/Golgi;other cell component	other molecular function		atl	0.881	1.53	1.349	1.015	1.329	0.813724	0.988593	0.994562	0.999219	0.992006	10.89	7.68	10.13	10.67
Q9W391	Probable phosphorylase b kinase regulatory subunit alpha	22	217	19	1247	other metabolic processes	plasma membrane;other membranes;other cell component	other molecular function	Glycogen breakdown (glycogenolysis)		0.935	0.661	0.618	0.926	0.667	0.998656	0.787554	0.938176	0.931101	0.992006	30.81	14.97	16.13	12.67
Q9VG82	Probable cytochrome P450 9f2	47	252	19	516	other biological processes	other membranes;ER/Golgi	other molecular function		Cyp9f2	0.758	1.044	0.792	0.984	0.805	0.265887	0.991669	0.994562	0.994447	0.992006	20.55	9.05	6.21	12.52
Q24208	Eukaryotic translation initiation factor 2 subunit 3	45	462	19	475	cell organization and biogenesis;protein metabolism;other metabolic processes	translational apparatus;other cell component	nucleic acid binding activity;other molecular function	ABC-family proteins mediated transport; Recycling of eIF2:GDP; L13a-mediated translational silencing of Ceruloplasmin expression; Translation initiation complex formation; Formation of the ternary complex, and subsequently, the 43S complex; Ribosomal scanning and start codon recognition; PERK regulates gene expression	eIF2gamma	1.103	1.667	1.839	1.047	1.757	0.952396	0.965462	0.994562	0.992936	0.992006	6.37	11.79	15.1	9.25
Q9W330	Phosphotransferase	51	384	19	541	other metabolic processes;other biological processes	cytosol;mitochondrion	kinase activity;other molecular function	Neutrophil degranulation; Regulation of Glucokinase by Glucokinase Regulatory Protein	Hex-A	0.979	0.858	0.84	0.904	0.929	0.998656	0.991669	0.994562	0.738462	0.992006	8.27	10.56	9.12	8.85
Q9VY04	Fezzik, isoform A	43	407	19	646	other metabolic processes;developmental processes;other biological processes		other molecular function	Choline catabolism	fiz	0.849	1.146	0.974	1.399	0.696	0.551074	0.999708	0.994562	0.00422115	0.992006	20.98	6.7	13.54	15.39
A0A0B4K5Z8	Protein transport protein SEC23	38	340	19	781	cell organization and biogenesis;transport;developmental processes;other biological processes	other membranes;ER/Golgi;other cell component	enzyme regulator activity;other molecular function	COPII-mediated vesicle transport; Cargo concentration in the ER; Antigen Presentation: Folding, assembly and peptide loading of class I MHC	Sec23	1.165	1.357	1.58	1.16	1.362	0.928279	0.991669	0.994562	0.758567	0.992006	10.34	18.03	17.24	18.65
O76922	Protein aubergine	30	188	19	866	cell cycle OR cell proliferation;cell organization and biogenesis;RNA metabolism OR transcription;other metabolic processes;developmental processes;other biological processes	other cell component	nucleic acid binding activity;other molecular function		aub	1.012	2.016	2.041	0.773	2.638	0.998656	0.702933	0.964289	0.304425	0.577374	30.08	14.08	28.28	24.79
Q7K4H4	Bifunctional lysine-specific demethylase and histidyl-hydroxylase NO66	40	183	19	653	cell organization and biogenesis;protein metabolism;other metabolic processes;other biological processes	nucleus	other molecular function		NO66	1.575	1.036	1.632	0.944	1.728	0.0827188	0.991669	0.994562	0.943236	0.992006	38.76	28.21	31.1	22.5
Q9VG81	RH49330p	50	384	19	431	other metabolic processes	other membranes;other cell component	other molecular function		Sccpdh2	0.904	1.133	1.025	1.12	0.915	0.819678	0.999685	0.996106	0.807902	0.992006	24.59	12.47	8.96	8.48
M9PCX4	Uncharacterized protein, isoform E	44	241	19	666	other metabolic processes	other membranes;ER/Golgi	other molecular function		ACSL1	0.993	1.003	0.996	1.012	0.984	0.998656	0.991669	0.994562	0.999871	0.992006	16.97	7.99	12.85	8.67
Q9W2U7	LP18708p	12	143	19	2309	other biological processes				nocte	1.762	1.124	1.981	0.955	2.074	0.0158834	0.999685	0.994562	0.992295	0.968262	61.24	40.7	52.31	24.27
Q9VX36	NADH dehydrogenase (Ubiquinone) 24 kDa subunit, isoform A	62	632	19	242	other metabolic processes	other membranes;mitochondrion	other molecular function	Complex I biogenesis	ND-24	0.774	0.69	0.534	1.069	0.5	0.125606	0.915234	0.953529	0.953021	0.861689	17.43	40.41	17.12	15.33
Q9VVU1	FI09602p	53	646	19	414			other molecular function	Branched-chain amino acid catabolism	GH07925p	0.907	0.859	0.778	1.033	0.754	0.831081	0.991669	0.994562	0.994447	0.992006	15.69	26.48	5.08	8.14
Q05344	FACT complex subunit Ssrp1	33	202	19	723	cell organization and biogenesis;DNA metabolism;other metabolic processes;stress response;other biological processes	cytosol;nucleus	nucleic acid binding activity;other molecular function	Regulation of TP53 Activity through Phosphorylation; Formation of RNA Pol II elongation complex ; RNA Polymerase II Pre-transcription Events; TP53 Regulates Transcription of DNA Repair Genes	Ssrp	1.175	1.42	1.669	1.23	1.357	0.861501	0.991669	0.994562	0.447207	0.992006	28.21	15.86	61.28	24.37
Q9VBP6	Succinate-semialdehyde dehydrogenase	50	300	19	509	other metabolic processes	mitochondrion	other molecular function	Degradation of GABA	Ssadh	0.94	1.057	0.993	1.008	0.985	0.976901	0.997109	0.994562	0.996612	0.992006	11.77	10.86	4.15	45.35
P91926	AP-2 complex subunit alpha	25	350	19	940	cell cycle OR cell proliferation;cell organization and biogenesis;transport;other biological processes	plasma membrane;other membranes;other cell component	other molecular function	Neutrophil degranulation; VLDLR internalisation and degradation; Cargo recognition for clathrin-mediated endocytosis; LDL clearance; Recycling pathway of L1; Retrograde neurotrophin signalling; Trafficking of GluR2-containing AMPA receptors; EPH-ephrin mediated repulsion of cells; WNT5A-dependent internalization of FZD4; WNT5A-dependent internalization of FZD2, FZD5 and ROR2	AP-2alpha	1.137	1.035	1.177	0.964	1.22	0.932059	0.991669	0.9983	0.979356	0.996032	6.04	2.43	7.28	7.62
A0A0B7P9G0	Unextended, isoform E	31	227	19	834	transport;other biological processes	plasma membrane;other membranes;other cell component	transporter activity		uex	1.118	0.84	0.939	1.114	0.843	0.998656	0.969413	0.994562	0.926875	0.992006	7.23	24.09	15.77	11.96
Q9VZU4	NADH dehydrogenase [ubiquinone] iron-sulfur protein 3, mitochondrial	66	688	19	265	other metabolic processes;transport	other membranes;mitochondrion	transporter activity	Complex I biogenesis	ND-30	1.031	0.768	0.792	0.948	0.836	0.998656	0.973991	0.994562	0.933682	0.992006	14.93	15.08	19.38	10.09
Q9VTU4	Eukaryotic translation initiation factor 3 subunit L	40	269	19	539	cell organization and biogenesis;protein metabolism;other metabolic processes	translational apparatus;other cell component	nucleic acid binding activity	L13a-mediated translational silencing of Ceruloplasmin expression; Translation initiation complex formation; Formation of a pool of free 40S subunits; Formation of the ternary complex, and subsequently, the 43S complex; Ribosomal scanning and start codon recognition	eIF3l	1.052	1.505	1.583	0.978	1.619	0.998656	0.991669	0.994562	0.994447	0.992006	13.15	6.17	17.3	11.56
A0A0B4KGE4	CD98 heavy chain, isoform G	36	391	19	629	other metabolic processes;transport	other membranes	other molecular function	Amino acid transport across the plasma membrane; Tryptophan catabolism	CD98hc	1.015	1.385	1.406	0.996	1.411	0.999628	0.991669	0.994562	0.994447	0.992006	6.81	7.66	7.63	7.42
Q9VZW7	Carnitine palmitoyltransferase 2	40	253	19	667	other metabolic processes;stress response;other biological processes	mitochondrion	other molecular function	Carnitine metabolism	CPT2	1.121	0.716	0.802	0.959	0.837	0.897272	0.938316	0.994562	0.951183	0.992006	19.35	7.82	6.45	5.89
Q9VEP3	Uncharacterized protein, isoform B	36	236	19	649	stress response;other biological processes	other cell component	other molecular function		Dmel\CG4009	1.336	2.892	3.863	1.246	3.101	0.226476	0.215854	0.315205	0.395535	0.512999	14.47	19.17	40.77	32.1
Q7JWQ7	RE01730p	56	359	19	431	other biological processes	non-structural extracellular;other cytoplasmic organelle;other cell component	other molecular function		Swim	0.653	0.916	0.598	0.928	0.645	0.00406105	0.991669	0.955797	0.863262	0.992006	44.89	31.18	32.77	17.7
Q7K110	Dolichyl-diphosphooligosaccharide--protein glycosyltransferase subunit 2	33	319	19	634	protein metabolism;other metabolic processes;other biological processes	other membranes;ER/Golgi	other molecular function		OstDelta	1.033	1.524	1.574	1.112	1.416	0.998656	0.988593	0.994562	0.835779	0.992006	10.39	10.5	14.3	13.59
M9PBV1	Phe-4-monooxygenase	52	224	19	452	other metabolic processes		other molecular function		Hn	0.959	0.889	0.853	0.992	0.86	0.998656	0.988593	0.994562	0.994447	0.992006	8.52	16.58	21.41	18.04
Q9VIE7	Glutamine amidotransferase	36	250	19	683	cell organization and biogenesis;other metabolic processes;developmental processes;other biological processes	cytosol;other cell component	enzyme regulator activity;other molecular function	Azathioprine ADME; Purine ribonucleoside monophosphate biosynthesis	bur	1.173	1.125	1.32	0.942	1.401	0.896521	0.999685	0.996106	0.936959	0.992006	10.84	10.69	22.58	10.34
Q9W3U0	Acyl-coenzyme A oxidase	34	212	19	677	other metabolic processes;other biological processes	other cytoplasmic organelle	other molecular function	Peroxisomal protein import; Beta-oxidation of pristanoyl-CoA; Synthesis of bile acids and bile salts via 7alpha-hydroxycholesterol	Dmel\CG4586	1.803	1.65	2.976	1.181	2.519	9.21816e-05	0.947619	0.705398	0.678591	0.896193	50.82	30.29	65.94	33.31
Q7K0E6	Aspartate--tRNA ligase, cytoplasmic	49	331	19	531	protein metabolism;RNA metabolism OR transcription;other metabolic processes	cytosol;other cell component	nucleic acid binding activity;other molecular function		AspRS	1.059	1.077	1.14	0.944	1.208	0.998656	0.999685	0.997675	0.931101	0.992762	18.03	10.87	13.21	5.2
Q9W2L6	RH02475p	36	210	19	679	other metabolic processes	other cell component	other molecular function		Dmel\CG9394	0.955	0.752	0.718	0.967	0.743	0.998656	0.888938	0.994562	0.988285	0.992006	15	17.52	19.78	9.67
Q9W3L4	GH20802p	55	544	19	414					Dmel\CG2233	1.373	3.118	4.28	0.815	5.249	0.0662868	0.26749	0.346637	0.140462	0.0591752	13.41	20.77	22.23	21.09
Q9VM75	HEAT repeat-containing protein 1 homolog	11	88	19	2096	RNA metabolism OR transcription;other metabolic processes;other biological processes	nucleus;other cell component	nucleic acid binding activity	Major pathway of rRNA processing in the nucleolus and cytosol	l(2)k09022	0.391	1.213	0.474	0.65	0.73	1.33388e-10	0.99616	0.544647	0.000344175	0.992006	53.13	49.68	34.31	53.9
Q0KHZ6	Electron transfer flavoprotein subunit beta	80	575	19	253	other metabolic processes	mitochondrion	other molecular function	Respiratory electron transport	Etfb	1.023	1.138	1.164	1.035	1.124	0.999039	0.999685	0.9983	0.994447	0.999838	12.77	11.17	8.09	13.94
Q7JRC3	Epoxide hydrolase	47	360	19	474	other metabolic processes	other membranes;ER/Golgi	other molecular function	Phase I - Functionalization of compounds	Jheh1	0.93	1.37	1.275	1.01	1.262	0.954286	0.991669	0.997675	0.999871	0.993518	19.5	10.06	5.54	8.33
Q9VQL1	Seryl-tRNA synthetase	43	396	19	501	protein metabolism;RNA metabolism OR transcription;other metabolic processes	cytosol;other cell component	nucleic acid binding activity;other molecular function		SerRS	1.062	1.385	1.471	0.963	1.528	0.998656	0.991669	0.994562	0.962749	0.992006	16.29	11.14	15.99	11.41
Q9VIJ0	Uncharacterized protein, isoform A	58	529	18	364		cytosol	other molecular function		Dmel\CG9331	1.016	1.097	1.115	1.195	0.933	0.999628	0.999685	0.997675	0.380544	0.992006	13.04	2.81	9.19	5.97
Q9VPX7	Capulet, isoform A	61	434	18	424	cell organization and biogenesis;developmental processes;signal transduction;other biological processes	cytosol;other cell component	cytoskeletal activity;other molecular function		capt	1.396	0.933	1.302	0.983	1.325	0.0433356	0.991669	0.996106	0.994447	0.992006	36.01	20.47	26.09	22.38
A0A0B4KHF0	Ferritin	71	771	18	236	transport;other biological processes	ER/Golgi;other cell component	other molecular function	Neutrophil degranulation; Iron uptake and transport	Fer2LCH	0.758	1.074	0.814	0.869	0.937	0.0825737	0.999685	0.994562	0.463104	0.992006	13.1	2	22.69	36.51
Q9VBR6	RE74917p	26	276	18	657	other metabolic processes		other molecular function		tobi	0.813	1.73	1.406	1.04	1.352	0.368636	0.936111	0.994562	0.994447	0.992006	30.77	9.73	25.73	12.41
M9NCS7	Uncharacterized protein, isoform G	24	169	18	1569	other biological processes	cytoskeleton			Dmel\CG8086	1.241	0.701	0.87	1.028	0.846	0.897272	0.830839	0.994562	0.994447	0.992006	12.1	12.17	15.37	11.54
Q8MZI3	RNA helicase	31	359	18	818		nucleus;other cell component	nucleic acid binding activity;other molecular function	mRNA Splicing - Major Pathway; SUMOylation of transcription cofactors; Estrogen-dependent gene expression	BcDNA:HL07910	1.092	2.1	2.294	0.969	2.369	0.998656	0.705251	0.964289	0.988285	0.896193	10.61	12.94	21.22	22.91
Q8MMD3	Epidermal growth factor receptor pathway substrate clone 15, isoform C	22	177	18	1106	transport;other biological processes	plasma membrane;other membranes;other cell component	other molecular function		Eps-15	0.937	0.639	0.598	0.907	0.66	0.954286	0.877668	0.994562	0.753484	0.992006	26.28	27.88	17.54	11.46
Q9VC06	LD37516p	31	203	18	730	protein metabolism;other metabolic processes		other molecular function		Dmel\CG11771	0.961	0.998	0.959	0.995	0.964	0.998656	0.991669	0.994562	0.994447	0.992006	8.87	6.45	17.33	8.83
Q9VMD7	Acyl-coenzyme A oxidase	39	169	18	703	other metabolic processes;other biological processes	other cytoplasmic organelle	other molecular function		Acox3	0.795	1.112	0.884	0.98	0.902	0.431355	0.998616	0.994562	0.994447	0.992006	37.18	20	65.6	59.83
A0A4D6K4F6	Obg-like ATPase 1	62	380	18	427		other membranes;other cell component	translation activity;other molecular function		Dmel\CG1354	0.985	1.573	1.549	1.031	1.502	0.998656	0.988593	0.994562	0.994447	0.992006	3.53	4.74	14.67	10.77
A0A4D6K3W6	Inosine-5'-monophosphate dehydrogenase	39	274	18	590	other metabolic processes	other cell component	other molecular function		ras	1.095	1.791	1.961	0.871	2.252	0.998656	0.911334	0.994562	0.692182	0.992006	16.97	15.01	31.77	19.26
Q9W414	Regulatory particle triple-A ATPase 4	61	300	18	397	protein metabolism;other metabolic processes;stress response;other biological processes	cytosol;nucleus;other cell component	nucleic acid binding activity;other molecular function	Antigen processing: Ubiquitination & Proteasome degradation; Neddylation; ABC-family proteins mediated transport; Degradation of beta-catenin by the destruction complex; Ub-specific processing proteases; Activation of NF-kappaB in B cells; Oxygen-dependent proline hydroxylation of Hypoxia-inducible Factor Alpha; Autodegradation of Cdh1 by Cdh1:APC/C; APC/C:Cdc20 mediated degradation of Securin; A…	Rpt4	1.355	1.258	1.705	0.811	2.101	0.0889111	0.991669	0.994562	0.231221	0.992006	32.7	23	45.02	33.67
Q9VL18	Probable elongation factor 1-delta	61	415	18	256	protein metabolism;other metabolic processes	cytosol;other cell component	enzyme regulator activity;nucleic acid binding activity	Eukaryotic Translation Elongation	eEF1delta	1.065	2.011	2.142	1.153	1.858	0.998656	0.845966	0.994562	0.629422	0.992006	6	8.6	30.18	20.1
P34739	Transcription termination factor 2	23	107	18	1061	cell cycle OR cell proliferation;cell organization and biogenesis;DNA metabolism;RNA metabolism OR transcription;other metabolic processes;stress response;other biological processes	nucleus;other cell component	nucleic acid binding activity;other molecular function		lds	1.544	1.932	2.983	1.131	2.638	0.119386	0.888938	0.657925	0.939976	0.660191	43.87	30.63	36.64	41.86
M9PD27	Eukaryotic peptide chain release factor subunit 1	61	286	18	437	cell organization and biogenesis;protein metabolism;other metabolic processes	other cell component	nucleic acid binding activity		eRF1	1.14	1.828	2.083	1.03	2.022	0.950637	0.895346	0.994562	0.994447	0.992006	16.73	12.13	21.77	20.93
A8JRC1	Uncharacterized protein, isoform D	55	1601	18	393	other metabolic processes	mitochondrion	other molecular function		Idh3g	1.03	0.783	0.806	1.038	0.776	0.998656	0.980994	0.994562	0.994447	0.992006	8.43	12.51	4.59	10.84
Q9VB10	GH01709p	49	442	18	412		mitochondrion;other cytoplasmic organelle			Hsdl2	1.045	1.227	1.283	0.896	1.432	0.998656	0.991669	0.996106	0.686899	0.992006	10.48	10.67	21.27	18.16
M9MRM4	Sac1 phosphatase, isoform B	38	150	18	592		other membranes	other molecular function		Sac1	0.945	1.139	1.077	1.02	1.056	0.998656	0.999685	0.996106	0.994968	0.992006	8.69	8.26	4.63	4.49
Q9VP77	DnaJ homolog subfamily C member 2	36	180	18	646	other biological processes	cytosol	translation activity;other molecular function	Regulation of HSF1-mediated heat shock response	Dmel\CG10565	0.937	1.53	1.434	0.89	1.611	0.960394	0.988593	0.994562	0.753484	0.992006	15.39	9.14	20.91	17.01
P20028	DNA-directed RNA polymerase I subunit RPA2	21	86	18	1129	RNA metabolism OR transcription;other metabolic processes	nucleus	nucleic acid binding activity;other molecular function	RNA Polymerase I Promoter Escape; RNA Polymerase I Transcription Initiation	RpI135	1.037	1.648	1.708	1.06	1.612	0.999628	0.980994	0.994562	0.992936	0.992006	23.2	12.08	19.23	18.08
O61613	Glycylpeptide N-tetradecanoyltransferase	32	312	18	472	protein metabolism;other metabolic processes;developmental processes	other membranes;other cell component	other molecular function	Inactivation, recovery and regulation of the phototransduction cascade	Nmt	1.218	1.872	2.28	1.023	2.229	0.613262	0.888938	0.952585	0.994447	0.992006	22.3	18.36	31.93	25.59
X2JAI4	DNA helicase	29	191	18	818	cell cycle OR cell proliferation;cell organization and biogenesis;DNA metabolism;other metabolic processes;developmental processes	nucleus;other cell component	nucleic acid binding activity;other molecular function		Mcm3	2.497	1.336	3.336	0.998	3.343	2.36429e-07	0.991669	0.26387	0.994447	0.242509	64.32	45.03	47.31	36.25
Q9W227	Peptidyl-prolyl cis-trans isomerase	68	1245	18	205	protein metabolism;other metabolic processes;other biological processes	non-structural extracellular;other cell component	other molecular function		Dmel\CG2852	1.263	1.673	2.112	0.987	2.141	0.294453	0.962397	0.994562	0.994447	0.992006	26.5	19.28	29.99	24.79
Q9VRP2	Uncharacterized protein, isoform A	57	393	18	391				Neutrophil degranulation	BEST:CK00496	1.265	1.685	2.132	1.004	2.123	0.285734	0.954517	0.994562	0.994447	0.992006	21.9	14.92	25.79	24.5
P07190	Maltase A1	50	480	18	577	other metabolic processes		other molecular function		Mal-A1	0.589	1.233	0.726	1.212	0.599	6.92089e-05	0.991669	0.994562	0.29592	0.992006	36.47	25.5	22.45	18.28
C6SUW3	40S ribosomal protein S9	47	738	18	195	protein metabolism;other metabolic processes	translational apparatus	nucleic acid binding activity;other molecular function		RpS9	0.969	1.802	1.746	0.993	1.759	0.998656	0.92376	0.994562	0.994447	0.992006	20.59	17.93	9.09	9.97
Q9VUQ5	Protein argonaute-2	22	177	18	1214	cell organization and biogenesis;RNA metabolism OR transcription;other metabolic processes;stress response;transport;developmental processes;other biological processes	nucleus;other cell component	nucleic acid binding activity;other molecular function	MicroRNA (miRNA) biogenesis; Small interfering RNA (siRNA) biogenesis; Post-transcriptional silencing by small RNAs	AGO2	1.099	0.913	1.004	1.159	0.866	0.978165	0.991669	0.996106	0.582965	0.992006	11.5	9.49	5.33	15.36
P06606	Tubulin alpha-4 chain	53	426	18	462	cell cycle OR cell proliferation;cell organization and biogenesis;transport;developmental processes	cytoskeleton;other cell component	cytoskeletal activity;other molecular function	COPI-dependent Golgi-to-ER retrograde traffic; Kinesins; COPI-mediated anterograde transport; HSP90 chaperone cycle for steroid hormone receptors (SHR) in the presence of ligand; COPI-independent Golgi-to-ER retrograde traffic	alphaTub67C	1.736	1.916	3.326	1.116	2.98	3.10894e-05	0.888938	0.651371	0.835779	0.570792	44.78	31.04	50.99	39.94
Q9VVA6	Nuclear migration protein NudC	63	224	18	332	transport;other biological processes	other cell component	other molecular function	EML4 and NUDC in mitotic spindle formation	nudC	1.148	1.584	1.818	0.964	1.886	0.98153	0.940263	0.994562	0.992295	0.992006	16.19	10.43	32.26	17.8
Q9VXI1	Beta hydroxy acid dehydrogenase 1, isoform A	59	433	18	315	other metabolic processes		other molecular function	Formation of xylulose-5-phosphate	Had1	1.058	1.427	1.509	1.276	1.183	0.998656	0.991669	0.994562	0.0872513	0.993518	14.35	6.28	12.66	10.74
Q9W0Y6	Transient receptor potential cation channel protein painless	28	142	18	913	stress response;transport;other biological processes	other membranes	transporter activity		pain	1.006	0.788	0.792	1.032	0.768	0.998656	0.965462	0.994562	0.994447	0.992006	14.53	9.72	16.04	9.69
M9PC99	Secretory 24CD, isoform C	21	264	18	1231	cell organization and biogenesis;transport;developmental processes;other biological processes	other membranes;ER/Golgi	other molecular function	COPII-mediated vesicle transport; Cargo concentration in the ER; Antigen Presentation: Folding, assembly and peptide loading of class I MHC	Sec24CD	1.008	1.559	1.571	1.049	1.497	0.998656	0.988593	0.994562	0.994447	0.992006	13.63	6.47	17.07	11.72
Q9W1G7	LD21576p	41	613	18	370	cell organization and biogenesis;DNA metabolism	mitochondrion;nucleus;other cell component	other molecular function		Nap1	1.158	1.915	2.219	1	2.219	0.718363	0.888938	0.987592	0.994447	0.968262	20.9	16.26	27.64	30.02
A4UZR3	Trehalase	42	346	18	560	other metabolic processes		other molecular function		Treh	1.036	0.851	0.882	0.856	1.03	0.998656	0.991669	0.994562	0.386118	0.992006	12.43	14.46	3.46	9.17
Q9W1G0	Probable transaldolase	43	594	18	331	other metabolic processes	other cell component	other molecular function	Pentose phosphate pathway; Insulin effects increased synthesis of Xylulose-5-Phosphate	Taldo	1.069	1.248	1.334	1.029	1.296	0.998656	0.991669	0.994562	0.994447	0.992006	13.82	14.51	12.31	3.06
Q9W5R8	60S ribosomal protein L5	48	732	18	299	cell organization and biogenesis;protein metabolism;other metabolic processes	cytosol;translational apparatus;nucleus	nucleic acid binding activity;other molecular function	Nonsense Mediated Decay (NMD) enhanced by the Exon Junction Complex (EJC); L13a-mediated translational silencing of Ceruloplasmin expression; Formation of a pool of free 40S subunits; Nonsense Mediated Decay (NMD) independent of the Exon Junction Complex (EJC); SRP-dependent cotranslational protein targeting to membrane; GTP hydrolysis and joining of the 60S ribosomal subunit	RpL5	1.03	1.942	2	0.976	2.049	0.998656	0.888938	0.994562	0.988285	0.992006	5.08	7.76	17.6	17.58
Q9VFQ9	Dipeptidase B, isoform A	48	383	18	508	protein metabolism	other cell component	other molecular function		Dip-B	1.338	1.098	1.469	1.02	1.44	0.115774	0.999685	0.994562	0.994447	0.992006	44.21	29.87	28.15	15.21
Q9VD58	GH26270p	56	1005	18	370	other metabolic processes;developmental processes	mitochondrion	other molecular function	Citric acid cycle (TCA cycle)	Idh3b	0.981	0.753	0.738	0.923	0.8	0.998656	0.965462	0.994562	0.838388	0.992006	6.17	8.01	6.86	6.92
Q9VHW0	AT07710p	38	246	18	530	other metabolic processes		other molecular function		Dmel\CG7910	0.902	1.334	1.203	0.908	1.325	0.834696	0.991669	0.99867	0.855136	0.992006	20.3	13.85	6.57	15.83
Q9VIB5	Carboxylic ester hydrolase	43	231	18	572	other biological processes		other molecular function		alpha-Est7	1.137	0.765	0.87	0.943	0.923	0.988923	0.890898	0.994562	0.939714	0.992006	29.04	8.78	16.49	12.56
Q9VM18	Trehalose 6-phosphate phosphatase	55	651	18	276	other metabolic processes		other molecular function		21430192	0.8	0.933	0.746	0.961	0.777	0.2173	0.991669	0.994562	0.957957	0.992006	20.11	15.65	8.67	13.31
P08266	DNA-directed RNA polymerase II subunit RPB2	20	132	18	1176	RNA metabolism OR transcription;other metabolic processes	nucleus	nucleic acid binding activity;other molecular function	mRNA Splicing - Major Pathway; Processing of Capped Intron-Containing Pre-mRNA; mRNA Splicing - Minor Pathway; RNA polymerase II transcribes snRNA genes; Formation of TC-NER Pre-Incision Complex; Dual incision in TC-NER; Gap-filling DNA repair synthesis and ligation in TC-NER; Formation of RNA Pol II elongation complex ; RNA Polymerase II Pre-transcription Events; Formation of the Early Elongatio…	RpII140	1.142	1.266	1.445	0.915	1.579	0.98153	0.991669	0.994562	0.931101	0.992006	31.85	17.77	18.6	13.38
Q9VI04	Beta-alanine synthase	61	260	18	386	other metabolic processes		other molecular function	Pyrimidine catabolism	pyd3	0.993	0.767	0.762	1.173	0.65	0.998656	0.907473	0.994562	0.727669	0.992006	14.6	11.25	13.01	10.71
Q9VJ28	FI05204p	47	315	18	455		mitochondrion	other molecular function	Interconversion of 2-oxoglutarate and 2-hydroxyglutarate	L2HGDH	1.025	0.88	0.902	1.049	0.86	0.999628	0.991669	0.994562	0.988285	0.992006	9.28	3.62	6.54	7.16
P32748	Dihydroorotate dehydrogenase (quinone), mitochondrial	52	229	18	405	other metabolic processes	other membranes;mitochondrion	other molecular function	Pyrimidine biosynthesis	Dhod	1.055	1.413	1.49	0.996	1.495	0.998656	0.991669	0.994562	0.994447	0.992006	8.54	8.93	13.27	15.55
Q9VSS2	Signal recognition particle subunit SRP68	32	168	18	604	transport	ER/Golgi;translational apparatus;nucleus	nucleic acid binding activity;other molecular function	SRP-dependent cotranslational protein targeting to membrane	Srp68	0.962	1.794	1.726	1.06	1.628	0.998656	0.906139	0.994562	0.993831	0.992006	7.12	13.41	20.14	19.64
Q9VEP6	Adenylosuccinate lyase	43	194	18	481	other metabolic processes	cytosol	other molecular function	Purine ribonucleoside monophosphate biosynthesis	AdSL	1.009	1.773	1.788	1.045	1.711	0.998656	0.901519	0.994562	0.994447	0.992006	13.22	10.48	19.24	13.91
Q7JYW9	Phosphotransferase	53	380	18	454	other metabolic processes;other biological processes	cytosol;mitochondrion	kinase activity;other molecular function	Neutrophil degranulation; Regulation of Glucokinase by Glucokinase Regulatory Protein	Hex-C	0.813	1.15	0.935	0.87	1.075	0.371828	0.999685	0.994562	0.615495	0.992006	21.82	13.18	15.66	6.28
Q7JR58	Enoyl-CoA hydratase, short chain 1, isoform A	56	712	18	295	other metabolic processes		other molecular function	Branched-chain amino acid catabolism; Beta oxidation of lauroyl-CoA to decanoyl-CoA-CoA; Beta oxidation of decanoyl-CoA to octanoyl-CoA-CoA; Beta oxidation of octanoyl-CoA to hexanoyl-CoA; Beta oxidation of hexanoyl-CoA to butanoyl-CoA; Beta oxidation of butanoyl-CoA to acetyl-CoA	Echs1	1.245	1.158	1.442	1.172	1.23	0.349006	0.999685	0.994562	0.512358	0.992006	9.39	9.67	13.02	7.67
Q9VKD3	Cysteine desulfurase, mitochondrial	51	307	18	462	cell organization and biogenesis;RNA metabolism OR transcription;other metabolic processes	cytosol;mitochondrion;nucleus	other molecular function	Mitochondrial iron-sulfur cluster biogenesis; Molybdenum cofactor biosynthesis	Nfs1	1.031	1.064	1.097	0.989	1.109	0.999628	0.99231	0.996106	0.994447	0.993518	13.55	4.74	4.83	4.72
B7Z098	Eukaryotic translation initiation factor 2A	37	187	18	638	protein metabolism;other metabolic processes		nucleic acid binding activity		eIF2A	1.068	1	1.068	0.952	1.122	0.998656	0.991669	0.996106	0.963131	0.996548	17.28	7.47	18.97	5.59
Q9VWC8	LD11581p	37	300	18	665	cell organization and biogenesis;other metabolic processes;transport	other membranes;other cytoplasmic organelle	transporter activity;other molecular function	RHOA GTPase cycle; Class I peroxisomal membrane protein import; ABC transporters in lipid homeostasis	Abcd3	1.08	1.138	1.229	1.065	1.154	0.998656	0.999685	0.999392	0.992295	0.996032	11.82	9.74	16.29	9.57
B7YZL5	Uncharacterized protein, isoform N	26	210	17	924		other membranes	other molecular function		Dmel\CG10737	1.311	0.748	0.981	0.997	0.984	0.541313	0.888938	0.994562	0.994447	0.992006	14.74	27.81	11.63	6.39
Q24238	Alkaline phosphatase 4	40	310	17	596	other metabolic processes;transport;developmental processes;other biological processes	non-structural extracellular;plasma membrane;other membranes;other cell component	other molecular function	Intra-Golgi traffic	Alp4	1.229	0.666	0.819	1.207	0.679	0.55999	0.888938	0.994562	0.319143	0.992006	7.76	5.3	8.31	7.74
Q9V3G1	60S ribosomal protein L8	61	560	17	256	protein metabolism;other metabolic processes	cytosol;translational apparatus;nucleus;other cell component	nucleic acid binding activity;other molecular function	Nonsense Mediated Decay (NMD) enhanced by the Exon Junction Complex (EJC); L13a-mediated translational silencing of Ceruloplasmin expression; Formation of a pool of free 40S subunits; Nonsense Mediated Decay (NMD) independent of the Exon Junction Complex (EJC); SRP-dependent cotranslational protein targeting to membrane; GTP hydrolysis and joining of the 60S ribosomal subunit	RpL8	0.858	1.523	1.308	0.799	1.636	0.53121	0.988593	0.996106	0.0749833	0.992006	13.92	15.06	20.56	20.39
M9NCR4	Dumpy, isoform J	2	62	17	15105	developmental processes;other biological processes	extracellular matrix;other membranes;nucleus	extracellular structural activity;other molecular function		dpy	0.827	0.681	0.564	1.22	0.462	0.910329	0.858299	0.877273	0.835779	0.472903	55.56	52.39	45.54	23.9
Q9VTZ5	LD22449p	24	194	17	819	cell organization and biogenesis;transport	non-structural extracellular;plasma membrane;other membranes;other cytoplasmic organelle;other cell component	other molecular function	Platelet degranulation ; Neutrophil degranulation; Regulation of Insulin-like Growth Factor (IGF) transport and uptake by Insulin-like Growth Factor Binding Proteins (IGFBPs); Post-translational protein phosphorylation; Iron uptake and transport; Metal sequestration by antimicrobial proteins	Tsf2	1.241	0.848	1.052	1.051	1.001	0.7775	0.988593	0.994562	0.994447	0.992006	18.21	23.55	14.59	10.94
P36241	60S ribosomal protein L19	46	1574	17	203	protein metabolism;other metabolic processes	cytosol;translational apparatus	nucleic acid binding activity;other molecular function	Nonsense Mediated Decay (NMD) enhanced by the Exon Junction Complex (EJC); L13a-mediated translational silencing of Ceruloplasmin expression; Formation of a pool of free 40S subunits; Nonsense Mediated Decay (NMD) independent of the Exon Junction Complex (EJC); SRP-dependent cotranslational protein targeting to membrane; GTP hydrolysis and joining of the 60S ribosomal subunit	RpL19	0.999	2.067	2.064	1.004	2.056	0.998656	0.827345	0.994562	0.994447	0.992006	13.17	10.45	18.68	15.17
Q9VIW3	Ran GTPase-activating protein	40	296	17	596	cell cycle OR cell proliferation;cell organization and biogenesis;transport;signal transduction;other biological processes	other membranes;cytosol;nucleus;other cell component	enzyme regulator activity;nucleic acid binding activity;other molecular function	SUMOylation of DNA replication proteins; Postmitotic nuclear pore complex (NPC) reformation	RanGAP	1.204	1.497	1.802	1.135	1.587	0.819678	0.988593	0.994562	0.848232	0.992006	24.94	11.17	21.32	21.73
Q7K2D2	Dynactin subunit 2	48	227	17	380	cell cycle OR cell proliferation;cell organization and biogenesis;transport;developmental processes;signal transduction;other biological processes	other membranes;cytoskeleton;other cell component		COPI-mediated anterograde transport; HSP90 chaperone cycle for steroid hormone receptors (SHR) in the presence of ligand; COPI-independent Golgi-to-ER retrograde traffic	DCTN2-p50	1.069	1.291	1.381	0.999	1.383	0.998656	0.991669	0.994562	0.994447	0.992006	11.15	10.45	10.47	10.22
Q9V3D4	Chitinase-like protein Idgf2	45	345	17	440	other metabolic processes;other biological processes	non-structural extracellular	signal transduction activity or receptor binding;other molecular function	Neutrophil degranulation; Digestion of dietary carbohydrate	Idgf2	1.01	0.861	0.869	1.11	0.783	0.998656	0.988593	0.994562	0.907695	0.992006	6.18	12.73	12.2	9.02
A1Z7S0	Receptor mediated endocytosis 8, isoform A	9	189	17	2408	cell organization and biogenesis;transport;other biological processes	other membranes;other cytoplasmic organelle		Neutrophil degranulation	Rme-8	1.315	1.173	1.543	0.942	1.639	0.51124	0.997109	0.994562	0.963131	0.992006	19.67	32.98	18.88	20.68
Q9VCC6	GM05240p	39	259	17	544	other metabolic processes	other cytoplasmic organelle	other molecular function		Dmel\CG6178	0.884	1.961	1.733	1.222	1.419	0.736751	0.835153	0.994562	0.487445	0.992006	9.97	13.55	28.97	21.98
Q9VGE7	Beta-galactosidase	37	157	17	637	other metabolic processes	other cytoplasmic organelle	other molecular function	Neutrophil degranulation; Glycosphingolipid metabolism; HS-GAG degradation; Keratan sulfate degradation	Ect3	1.187	1.387	1.647	1.218	1.352	0.910329	0.991669	0.994562	0.576874	0.992006	11.01	3.34	15.58	12.66
Q27580	Adenosylhomocysteinase	45	420	17	432	other metabolic processes	cytosol	other molecular function	Methylation; Sulfur amino acid metabolism	Ahcy	1.169	1.316	1.538	1.126	1.366	0.683742	0.991669	0.994562	0.787706	0.992006	18.39	8.54	12	15.53
Q95TZ7	GH19182p	61	500	17	402	cell organization and biogenesis;other biological processes	cytoskeleton;other cell component	cytoskeletal activity;other molecular function		Zasp66	1.085	0.685	0.744	0.976	0.762	0.987698	0.914961	0.994562	0.988285	0.992006	10.48	6.8	6.88	6.08
Q9VG44	RE14195p	36	133	17	704		other cell component	other molecular function		Dmel\CG6225	1.062	0.67	0.711	0.955	0.745	0.998656	0.858299	0.994562	0.963723	0.992006	17.73	19.99	11.82	13.99
A0A023GQA5	Prohibitin	79	887	17	276		other membranes;mitochondrion			Phb1	1.31	1.09	1.427	1.119	1.275	0.164837	0.999685	0.994562	0.807902	0.992006	25.23	15.1	17.1	10.79
Q7JXB5	Phosphoenolpyruvate carboxykinase (GTP)	34	165	17	638	other metabolic processes;stress response;other biological processes	cytosol;other cell component	other molecular function		Pepck2	1.056	0.697	0.736	1.189	0.619	0.998656	0.888938	0.994562	0.714318	0.942086	18.43	8.5	12.95	11.74
Q9VGM2	Fatty acid binding protein, isoform B	83	625	17	130	transport;other biological processes	nucleus	other molecular function		fabp	0.983	1.536	1.511	1.111	1.359	0.998656	0.988593	0.994562	0.837333	0.992006	20.3	20.83	26.81	30.75
M9NFL1	Eukaryotic translation initiation factor 5B	19	206	17	1090	protein metabolism;other metabolic processes	mitochondrion;other cell component	nucleic acid binding activity;other molecular function		eIF5B	0.96	2.298	2.207	1.242	1.778	0.998656	0.544228	0.968402	0.432471	0.992006	10.75	9.38	24.44	11.57
Q9VKE2	Crystallin, isoform A	29	726	17	477	developmental processes;other biological processes	non-structural extracellular;extracellular matrix	other molecular function		Crys	0.991	0.564	0.559	0.904	0.618	0.998656	0.755482	0.964289	0.738981	0.992006	10.4	15.76	15.52	6.74
O61604	Fimbrin	33	302	17	640	cell organization and biogenesis	cytoskeleton;other cell component	cytoskeletal activity;other molecular function		Fim	1.055	0.873	0.922	0.938	0.983	0.998656	0.991669	0.994562	0.926643	0.992006	8.17	3.24	13.23	5.48
A0A0B4KH34	Annexin	49	545	17	324			other molecular function		AnxB9	0.892	0.819	0.73	0.987	0.74	0.736634	0.988593	0.994562	0.994447	0.992006	14.4	18.58	10.79	16.52
P12370	cAMP-dependent protein kinase catalytic subunit 1	47	350	17	353	cell organization and biogenesis;protein metabolism;other metabolic processes;stress response;developmental processes;signal transduction;other biological processes	plasma membrane;other membranes;cytosol;nucleus;other cell component	kinase activity;other molecular function	Ion homeostasis; Factors involved in megakaryocyte development and platelet production; Vasopressin regulates renal water homeostasis via Aquaporins; CD209 (DC-SIGN) signaling; GLI3 is processed to GLI3R by the proteasome; Glucagon-like Peptide-1 (GLP1) regulates insulin secretion; Rap1 signalling; PKA activation; Phosphorylation of CI; Ubiquitination and proteolysis of phosphorylated CI; PKA act…	Pka-C1	1.07	0.898	0.961	0.941	1.021	0.998656	0.991669	0.994562	0.931101	0.992762	12.08	15.1	6.98	10.15
P08171	Esterase-6	37	432	17	544	other metabolic processes;other biological processes	non-structural extracellular	other molecular function	Physiological factors; Synthesis of PC; Neurotransmitter clearance; Aspirin ADME; Metabolism of Angiotensinogen to Angiotensins; Phase I - Functionalization of compounds; LDL clearance	Est-6	0.949	1.026	0.974	1.169	0.833	0.998656	0.991669	0.994562	0.531692	0.992006	14.11	12.77	10.72	6.4
Q9XYU0	DNA replication licensing factor Mcm7	28	164	17	720	cell cycle OR cell proliferation;cell organization and biogenesis;DNA metabolism;other metabolic processes;stress response;other biological processes	nucleus;other cell component	nucleic acid binding activity;other molecular function	Assembly of the pre-replicative complex; Orc1 removal from chromatin; Activation of ATR in response to replication stress; Activation of the pre-replicative complex	Mcm7	1.927	1.357	2.614	1.05	2.489	0.00157089	0.991669	0.808161	0.994447	0.727106	54.89	34.39	52.85	34.5
Q9Y112	BcDNA.GH10614	67	456	17	316		cytosol	other molecular function	RA biosynthesis pathway; Retinoid metabolism and transport; Prednisone ADME; Estrogen biosynthesis; Synthesis of bile acids and bile salts via 7alpha-hydroxycholesterol; Synthesis of bile acids and bile salts via 24-hydroxycholesterol; Synthesis of bile acids and bile salts via 27-hydroxycholesterol; Synthesis of Prostaglandins (PG) and Thromboxanes (TX)	Dmel\CG10863	0.98	1.145	1.122	1.056	1.063	0.998656	0.999685	0.9983	0.97686	0.993959	7.94	14.48	9.92	7.33
Q7JWF1	Electron transfer flavoprotein-ubiquinone oxidoreductase	38	513	17	604	other metabolic processes	other membranes;mitochondrion	other molecular function	Respiratory electron transport	Etf-QO	1.028	0.995	1.023	0.931	1.099	0.998656	0.991669	0.996106	0.887493	0.999391	6.48	5.97	9.81	7.64
O97477	Inositol-3-phosphate synthase	33	289	17	565	other metabolic processes	other cell component	other molecular function	Synthesis of IP2, IP, and Ins in the cytosol	Inos	1.066	1.159	1.235	0.906	1.364	0.998656	0.999685	0.997675	0.768952	0.992006	5.89	12.02	20.54	8.89
P54397	39 kDa FK506-binding nuclear protein	39	469	17	357	signal transduction;other biological processes	nucleus;other cell component	nucleic acid binding activity;other molecular function		Fkbp39	0.985	1.239	1.22	0.905	1.348	0.998656	0.991669	0.996701	0.74902	0.992006	14.23	9.65	5.52	9.59
Q9V9U3	LD45254p	45	230	17	489	other biological processes				anon-WO0118547.398	1.1	1.433	1.576	1.095	1.44	0.998656	0.991669	0.994562	0.936959	0.992006	7.33	13.09	26.31	14.85
Q9VFV9	DnaJ-like-2, isoform A	47	347	17	403	stress response;other biological processes	other membranes;cytosol;other cell component	other molecular function	HSP90 chaperone cycle for steroid hormone receptors (SHR) in the presence of ligand	Droj2	1.068	1.831	1.956	1.033	1.894	0.998656	0.912673	0.994562	0.994447	0.992006	5.02	13.64	18.3	14.26
Q9VCK0	Eukaryotic translation initiation factor 3 subunit D-1	49	326	17	560	cell organization and biogenesis;protein metabolism;other metabolic processes;other biological processes	cytosol;translational apparatus;nucleus;other cell component	nucleic acid binding activity	L13a-mediated translational silencing of Ceruloplasmin expression; Translation initiation complex formation; Formation of the ternary complex, and subsequently, the 43S complex; Ribosomal scanning and start codon recognition; Formation of a pool of free 40S subunits	eIF3d1	1.043	1.865	1.946	0.998	1.951	0.998656	0.896842	0.994562	0.994447	0.992006	7.82	9.23	18.7	19.34
Q9VIX4	Acyl-coenzyme A oxidase	38	113	17	693	other metabolic processes;other biological processes	other cytoplasmic organelle	other molecular function		Dmel\CG17544	1.148	0.815	0.936	0.996	0.939	0.969028	0.946966	0.994562	0.994447	0.992006	24.44	8.71	10.59	8.33
Q24400	Muscle LIM protein Mlp84B	47	423	17	495	cell organization and biogenesis;other biological processes	cytoskeleton;nucleus;other cell component	other molecular function		Mlp84B	0.962	0.841	0.81	0.908	0.891	0.998656	0.991669	0.994562	0.76488	0.992006	8.59	8.73	9.55	5.1
Q9W1H8	GH13256p	39	783	17	469	other metabolic processes;other biological processes		other molecular function	Beta oxidation of palmitoyl-CoA to myristoyl-CoA; Beta oxidation of lauroyl-CoA to decanoyl-CoA-CoA; Beta oxidation of decanoyl-CoA to octanoyl-CoA-CoA; Beta oxidation of octanoyl-CoA to hexanoyl-CoA; Beta oxidation of hexanoyl-CoA to butanoyl-CoA; Acyl chain remodeling of CL; Beta oxidation of myristoyl-CoA to lauroyl-CoA	Mtpbeta	1.317	0.855	1.126	1.022	1.102	0.150377	0.991669	0.9983	0.994447	0.999391	19.25	23.83	18.44	16.79
P10351	Xanthine dehydrogenase	20	161	17	1335	other metabolic processes;other biological processes	other cytoplasmic organelle	other molecular function	Azathioprine ADME; Purine catabolism; Vitamins B6 activation to pyridoxal phosphate	ry	1.069	1.233	1.318	1.156	1.14	0.998656	0.991669	0.996106	0.835779	0.999838	18.67	10.64	20.7	18.56
P45594	Cofilin/actin-depolymerizing factor homolog	78	1726	17	148	cell cycle OR cell proliferation;cell organization and biogenesis;developmental processes;other biological processes	cytoskeleton;nucleus;other cell component	cytoskeletal activity		tsr	1.095	1.12	1.227	0.903	1.358	0.973448	0.999685	0.996701	0.728255	0.992006	10.87	8.83	11.94	5.54
Q0KHU2	IGF-II mRNA-binding protein, isoform K	35	210	17	631	cell organization and biogenesis;RNA metabolism OR transcription;other metabolic processes;stress response;transport;developmental processes;other biological processes	cytosol;nucleus;other cell component	nucleic acid binding activity		Imp	0.995	2.151	2.141	1.058	2.024	0.998656	0.778862	0.994562	0.989454	0.992006	11.67	12.12	22.82	16.94
P21914	Succinate dehydrogenase [ubiquinone] iron-sulfur subunit, mitochondrial	58	1530	17	297	other metabolic processes	other membranes;mitochondrion	other molecular function	Citric acid cycle (TCA cycle)	SdhB	0.868	0.867	0.752	1.024	0.734	0.589989	0.991669	0.994562	0.994447	0.992006	7.45	16.42	16.85	10.43
Q7KUA4	SUMO-activating enzyme subunit	35	309	17	700	protein metabolism;other metabolic processes;other biological processes	nucleus;other cell component	other molecular function		Uba2	0.95	1.567	1.489	1.101	1.352	0.998656	0.974363	0.994562	0.933682	0.992006	19.14	11.46	24.89	16.47
Q76NQ0	Dolichyl-diphosphooligosaccharide--protein glycosyltransferase subunit 1	49	291	17	458	protein metabolism;other metabolic processes	other membranes;ER/Golgi	other molecular function		CG5364	0.94	1.414	1.329	1.011	1.315	0.964362	0.991669	0.996106	0.999871	0.992006	8.22	13.2	22.29	11.84
A8DYB0	Midasin	5	88	17	5526	cell organization and biogenesis;transport	nucleus;other cell component	other molecular function		Dmel\CG13185	0.919	2.267	2.084	1.086	1.918	0.935971	0.601171	0.994562	0.963131	0.992006	38.43	32.63	35.86	25.85
Q86BS3	Chromator, isoform A	27	167	17	926	cell cycle OR cell proliferation;cell organization and biogenesis;developmental processes;signal transduction	cytoskeleton;nucleus;other cell component	other molecular function		Chro	0.995	0.818	0.814	0.893	0.911	0.998656	0.964509	0.994562	0.824468	0.992006	11.61	10.89	15.07	8.66
Q9VCR2	Uncharacterized protein, isoform A	65	357	17	401	other metabolic processes	other cell component	other molecular function		Dmel\CG6726	1.17	0.748	0.875	1.143	0.765	0.676599	0.963529	0.994562	0.687567	0.992006	17.99	8.55	14.71	8.61
O18404	3-hydroxyacyl-CoA dehydrogenase type-2	82	1083	17	255	RNA metabolism OR transcription;other metabolic processes;developmental processes	mitochondrion	other molecular function	Branched-chain amino acid catabolism	scu	1.414	0.942	1.331	1.14	1.168	0.0312131	0.991669	0.994562	0.704301	0.993959	26.03	25.74	19.74	17.79
Q9W2G9	Acyl-coenzyme A oxidase	38	221	17	677	other metabolic processes;other biological processes	other cytoplasmic organelle	other molecular function	Peroxisomal protein import; Beta-oxidation of pristanoyl-CoA; Synthesis of bile acids and bile salts via 7alpha-hydroxycholesterol	Acox57D-p	1.017	1.505	1.531	1.08	1.417	0.998656	0.965462	0.994562	0.963723	0.992006	8.47	8.56	18.05	14.7
P48601	26S proteasome regulatory subunit 4	45	315	17	439	protein metabolism;other metabolic processes;other biological processes	cytosol;nucleus;other cell component	other molecular function	Antigen processing: Ubiquitination & Proteasome degradation; Neddylation; Regulation of RAS by GAPs; ABC-family proteins mediated transport; Degradation of beta-catenin by the destruction complex; Ub-specific processing proteases; Activation of NF-kappaB in B cells; Oxygen-dependent proline hydroxylation of Hypoxia-inducible Factor Alpha; Cross-presentation of soluble exogenous antigens (endosome…	Rpt2	0.882	1.284	1.132	1.15	0.985	0.683742	0.991669	0.999392	0.650295	0.992006	18.16	16.67	18.62	22.57
B5RIV0	Bubblegum, isoform C	30	161	17	666	other metabolic processes		other molecular function		bgm	0.991	1.687	1.671	1.022	1.635	0.998656	0.953225	0.994562	0.994447	0.992006	7.85	6.5	9.94	18.34
M9PCE8	Angiotensin-converting enzyme	33	283	17	630	protein metabolism	other membranes	other molecular function		Acer	0.997	1.595	1.591	0.936	1.699	0.998656	0.980994	0.994562	0.913054	0.992006	18.21	9.79	9.21	10.67
Q9VC92	GH15945p	35	242	17	674	other metabolic processes	mitochondrion	other molecular function	Synthesis of Ketone Bodies	Dmel\CG6432	0.943	1.033	0.974	0.995	0.979	0.983502	0.991669	0.994562	0.994447	0.992006	18.27	9.9	9.37	11.16
P28750	Maternal protein exuperantia	36	212	17	532	cell organization and biogenesis;RNA metabolism OR transcription;other metabolic processes;transport;developmental processes;other biological processes	other cell component	nucleic acid binding activity;other molecular function		exu	0.691	3.419	2.363	0.94	2.514	0.0667496	0.0640143	0.878852	0.963131	0.692783	61.36	39.93	23.32	38.08
Q9VE00	Probable cytochrome P450 12a4, mitochondrial	44	341	17	536	other biological processes	other membranes;mitochondrion	other molecular function		Cyp12a4	0.923	1.637	1.51	1.111	1.359	0.917748	0.967113	0.994562	0.931101	0.992006	14.34	20.69	10.21	9.17
Q9VH07	RuvB-like helicase 1	50	231	16	456	cell cycle OR cell proliferation;cell organization and biogenesis;protein metabolism;DNA metabolism;RNA metabolism OR transcription;other metabolic processes;stress response;other biological processes	nucleus;other cell component	other molecular function	Ub-specific processing proteases; UCH proteinases; DNA Damage Recognition in GG-NER; Formation of the beta-catenin:TCF transactivating complex	pont	1.554	1.495	2.323	1.406	1.653	0.00224463	0.991669	0.969822	0.0155912	0.992006	39.59	21.8	33.81	26.4
M9PIM0	Ribosomal protein L10, isoform E	64	1011	16	218	protein metabolism;other metabolic processes	translational apparatus;other cell component	other molecular function		RpL10	0.93	1.99	1.851	0.886	2.089	0.938629	0.861164	0.994562	0.5989	0.992006	10.37	9.03	16.14	20.07
P55841	60S ribosomal protein L14	51	818	16	166	protein metabolism;other metabolic processes;other biological processes	cytosol;translational apparatus	nucleic acid binding activity;other molecular function	Nonsense Mediated Decay (NMD) enhanced by the Exon Junction Complex (EJC); L13a-mediated translational silencing of Ceruloplasmin expression; Formation of a pool of free 40S subunits; Nonsense Mediated Decay (NMD) independent of the Exon Junction Complex (EJC); SRP-dependent cotranslational protein targeting to membrane; GTP hydrolysis and joining of the 60S ribosomal subunit	RpL14	0.973	1.956	1.904	0.965	1.973	0.998656	0.877896	0.994562	0.963131	0.992006	7.78	11.02	16.68	15.32
Q7KMP8	26S proteasome non-ATPase regulatory subunit 13	49	352	16	382	protein metabolism;other metabolic processes	cytosol;nucleus;other cell component	other molecular function	Neutrophil degranulation; Antigen processing: Ubiquitination & Proteasome degradation; Neddylation; Regulation of RAS by GAPs; ABC-family proteins mediated transport; Degradation of beta-catenin by the destruction complex; Ub-specific processing proteases; Activation of NF-kappaB in B cells; Oxygen-dependent proline hydroxylation of Hypoxia-inducible Factor Alpha; Cross-presentation of soluble ex…	Rpn9	1.251	1.53	1.915	1.2	1.596	0.329183	0.991669	0.994562	0.386959	0.992006	22.83	23.39	32.24	20.94
A0A6M3Q7C8	SR protein kinase, isoform E	24	144	16	1009	protein metabolism;other metabolic processes		kinase activity;other molecular function		SRPK	1.902	1.16	2.207	0.841	2.624	0.00336298	0.999685	0.951763	0.717872	0.502237	51.11	28.17	46.61	47.11
M9PBF6	Dynamin associated protein 160, isoform G	24	248	16	1088	transport;other biological processes	plasma membrane;other membranes;ER/Golgi;other cell component	other molecular function		Dap160	0.937	0.942	0.883	0.907	0.973	0.983502	0.991669	0.994562	0.863262	0.992006	10.43	11.63	12.69	8.7
M9PFR8	Artemis, isoform B	20	167	16	1080	transport	nucleus;other cell component	other molecular function		Arts	1.188	1.52	1.807	0.899	2.011	0.861501	0.988593	0.994562	0.835779	0.992006	22.04	14.15	29.99	18.45
A0A0B4KHR8	Multiple ankyrin repeats single KH domain, isoform E	6	127	16	4000	other biological processes		nucleic acid binding activity		mask	1.031	1.139	1.174	0.917	1.281	0.999628	0.999685	0.999392	0.931101	0.992006	5.63	9.62	12.34	10.34
Q7JQR3	Sulfhydryl oxidase	25	183	16	637	other biological processes	non-structural extracellular;other membranes;ER/Golgi	other molecular function	Neutrophil degranulation; Platelet degranulation ; Regulation of Insulin-like Growth Factor (IGF) transport and uptake by Insulin-like Growth Factor Binding Proteins (IGFBPs); Post-translational protein phosphorylation	Qsox1	0.96	1.786	1.715	0.983	1.745	0.998656	0.928382	0.994562	0.994447	0.992006	19.32	14.68	10.42	11.29
A0A0B4K692	Neprilysin-2	28	216	16	774	protein metabolism;other metabolic processes;other biological processes	non-structural extracellular;other membranes	other molecular function	Neutrophil degranulation; Physiological factors	Nep2	1.179	1.115	1.315	1.019	1.291	0.931328	0.999685	0.996106	0.999436	0.992006	8.54	9.83	9.85	40.37
Q7KSQ0	LD46175p	46	588	16	317	transport	other membranes;mitochondrion;other cell component	transporter activity	Gluconeogenesis; Fatty acyl-CoA biosynthesis	sea	0.865	1.266	1.095	1.11	0.986	0.571825	0.991669	0.997675	0.842234	0.992006	24.33	8.37	9.83	8.63
M9PC31	Nicotinate phosphoribosyltransferase	36	195	16	550	other metabolic processes		other molecular function		Naprt	1.056	0.815	0.861	0.949	0.907	0.998656	0.970166	0.994562	0.961415	0.992006	8.06	9.42	12.75	3.81
Q7KN94	Electron transfer flavoprotein subunit alpha	64	539	16	330	other metabolic processes;developmental processes;other biological processes	mitochondrion	other molecular function	Respiratory electron transport	wal	0.946	1.166	1.103	0.965	1.144	0.983502	0.999685	0.997675	0.963131	0.9991	8.43	8.36	9.09	5.52
Q7K3B7	2-hydroxyacyl-CoA lyase	42	218	16	568	other metabolic processes	other cytoplasmic organelle	other molecular function	Peroxisomal protein import; Alpha-oxidation of phytanate	Hacl	1.802	1.364	2.459	1.212	2.029	0.00127479	0.991669	0.899702	0.572242	0.992006	46.97	34.2	47.76	32.89
P29310	14-3-3 protein zeta	65	989	16	248	cell cycle OR cell proliferation;cell organization and biogenesis;developmental processes;signal transduction;other biological processes	cytosol;other cytoplasmic organelle;other cell component	other molecular function	Signaling by Hippo; Negative regulation of MAPK pathway; RAF activation; Rap1 signalling; TP53 Regulates Transcription of Genes Involved in G2 Cell Cycle Arrest; TP53 Regulates Metabolic Genes; RHO GTPases activate PKNs; KSRP (KHSRP) binds and destabilizes mRNA; mTORC1-mediated signalling; Deactivation of the beta-catenin transactivating complex; Butyrate Response Factor 1 (BRF1) binds and destab…	14-3-3zeta	1.002	0.825	0.827	0.884	0.935	0.998656	0.991669	0.994562	0.580785	0.992006	7.97	9.91	20.84	8.4
Q9V475	Cullin 3, isoform C	27	103	16	773	cell organization and biogenesis;protein metabolism;other metabolic processes;developmental processes;other biological processes	nucleus;other cell component	other molecular function	Nuclear CI is degraded	Cul3	0.861	1.29	1.111	0.67	1.657	0.707594	0.991669	0.996701	0.0283039	0.992006	17.86	12.01	39.49	14.97
Q961Q8	GH10454p	45	202	16	405			other molecular function		Dmel\CG10562	0.923	1.222	1.128	1.29	0.874	0.98153	0.997096	0.996106	0.390111	0.992006	39.16	19.63	18.64	16.51
M9PIA6	Mi-2, isoform D	11	176	16	1973	cell organization and biogenesis	nucleus;other cell component	nucleic acid binding activity;other molecular function		Mi-2	1.16	1.006	1.167	0.771	1.513	0.954286	0.991669	0.997675	0.31634	0.992006	24.18	19.1	24.9	28.22
Q0KIA8	Carnitine O-Acetyl-Transferase, isoform B	34	295	16	657	other metabolic processes	other cytoplasmic organelle	other molecular function		CRAT	1.04	0.975	1.014	1.101	0.921	0.999628	0.991669	0.994562	0.936959	0.992006	9.69	12.39	13.99	4.9
Q9VP57	LD15904p	20	183	16	996	cell organization and biogenesis;signal transduction;other biological processes	nucleus;other cell component	nucleic acid binding activity;other molecular function		pzg	1.06	0.905	0.96	0.885	1.084	0.998656	0.991669	0.994562	0.848232	0.993518	6.36	9.51	21.43	20.75
P12080	Integrin alpha-PS2	18	279	16	1396	cell adhesion;cell organization and biogenesis;developmental processes;signal transduction;other biological processes	plasma membrane;other membranes;other cell component	signal transduction activity or receptor binding;other molecular function	Neutrophil degranulation; Platelet degranulation ; TGF-beta receptor signaling activates SMADs; Signal transduction by L1; Integrin signaling; p130Cas linkage to MAPK signaling for integrins; Cross-presentation of particulate exogenous antigens (phagosomes); Integrin cell surface interactions; Syndecan interactions; MAP2K and MAPK activation; GRB2:SOS provides linkage to MAPK signaling for Integr…	if	0.889	0.833	0.74	1.035	0.715	0.862124	0.95817	0.994562	0.994447	0.992006	9.24	16.96	15.48	6.37
Q9VDQ7	Phagocyte signaling-impaired protein	19	131	16	948	cell organization and biogenesis;protein metabolism;other metabolic processes;stress response;transport;developmental processes;other biological processes	other cytoplasmic organelle;other cell component	cytoskeletal activity		psidin	1.152	1.817	2.092	1.227	1.706	0.975927	0.888938	0.964289	0.632475	0.992006	27.96	15.46	25.38	16.63
P39018	40S ribosomal protein S19a	56	683	16	156	cell organization and biogenesis;protein metabolism;other metabolic processes	cytosol;translational apparatus	nucleic acid binding activity;other molecular function	Nonsense Mediated Decay (NMD) enhanced by the Exon Junction Complex (EJC); L13a-mediated translational silencing of Ceruloplasmin expression; Translation initiation complex formation; Formation of a pool of free 40S subunits; Formation of the ternary complex, and subsequently, the 43S complex; Ribosomal scanning and start codon recognition; Nonsense Mediated Decay (NMD) independent of the Exon Ju…	RpS19a	0.973	1.904	1.852	0.989	1.873	0.998656	0.888938	0.994562	0.994447	0.992006	10.39	12.97	11.42	12.3
Q9VNE2	Protein krasavietz	44	294	16	422	cell organization and biogenesis;developmental processes;other biological processes	other cell component	translation activity;other molecular function		kra	0.963	2.127	2.049	1.131	1.811	0.998656	0.678979	0.994562	0.899516	0.992006	4.19	18.4	35.99	18.33
D0IQK3	AMP deaminase	27	300	16	777	other metabolic processes		other molecular function		AMPdeam	1.153	0.988	1.139	0.99	1.15	0.862124	0.991669	0.996701	0.994447	0.999838	11.17	11.06	4.62	3.31
Q9VHC3	Blistery, isoform A	28	174	16	720	developmental processes;other biological processes	other cell component	cytoskeletal activity;other molecular function		by	0.932	0.483	0.45	0.853	0.528	0.998656	0.381195	0.492886	0.638763	0.743856	20.29	37.64	27.17	10.72
Q8IML5	V-type proton ATPase subunit a	27	255	16	833	cell organization and biogenesis;other metabolic processes;transport;developmental processes;other biological processes	other membranes;ER/Golgi;other cytoplasmic organelle;other cell component	transporter activity;other molecular function		Vha100-1	0.955	1.113	1.064	0.98	1.085	0.998656	0.999685	0.996106	0.994447	0.992762	4.73	9.88	5.99	3.74
Q9VAP0	Aminopeptidase	23	144	16	990	protein metabolism;other metabolic processes	other membranes;other cell component	other molecular function		superdeath	1.804	1.369	2.471	0.986	2.506	0.0110485	0.991669	0.936866	0.994447	0.733656	58.83	32.56	43.5	31.11
Q9VYT3	FI23714p1	19	133	16	1147	protein metabolism;other biological processes	mitochondrion;other cell component	other molecular function		Nrd1	0.963	1.526	1.469	0.945	1.555	0.998656	0.991669	0.994562	0.988285	0.992006	21.22	14.97	16.98	7.52
Q9VFC2	Serine protease inhibitor 88Ea	39	260	16	427	other metabolic processes;developmental processes;other biological processes	non-structural extracellular	enzyme regulator activity	Neutrophil degranulation; COPII-mediated vesicle transport; Cargo concentration in the ER; Platelet degranulation ; Regulation of Insulin-like Growth Factor (IGF) transport and uptake by Insulin-like Growth Factor Binding Proteins (IGFBPs); Post-translational protein phosphorylation; Intrinsic Pathway of Fibrin Clot Formation; Glucocorticoid biosynthesis; Prednisone ADME	Spn88Ea	1.489	1.113	1.657	1.219	1.36	0.0469198	0.999685	0.994562	0.441322	0.992006	44.89	20.3	23.15	20.24
Q86BY9	Protein rigor mortis	18	145	16	1235	cell organization and biogenesis;RNA metabolism OR transcription;other metabolic processes;other biological processes	nucleus;other cell component	nucleic acid binding activity		rig	1.236	1.547	1.912	1.156	1.654	0.746292	0.973991	0.994562	0.802131	0.992006	27.74	13.35	30.86	17.75
Q27268	ATP-dependent RNA helicase WM6	46	319	16	424	cell organization and biogenesis;RNA metabolism OR transcription;other metabolic processes;transport;other biological processes	nucleus	nucleic acid binding activity;other molecular function	mRNA Splicing - Major Pathway; RHOBTB2 GTPase cycle; Transport of Mature mRNA derived from an Intron-Containing Transcript; RNA Polymerase II Transcription Termination; mRNA 3'-end processing	Hel25E	1.077	1.221	1.315	0.965	1.363	0.998656	0.993976	0.996106	0.963131	0.992006	13.85	8.46	9.9	8.34
M9PCI5	Phosphorylase b kinase regulatory subunit	22	117	16	1098	other metabolic processes	plasma membrane;other membranes	other molecular function		Dmel\CG8475	0.984	0.786	0.774	1.03	0.751	0.998656	0.947619	0.994562	0.994447	0.992006	16.3	5.45	11.08	12.84
Q9VSK9	GH24787p	30	170	16	734	RNA metabolism OR transcription;other metabolic processes	nucleus	nucleic acid binding activity;other molecular function		Pus7	1.021	1.525	1.556	0.953	1.634	0.999628	0.988593	0.994562	0.988285	0.992006	15.82	15.63	23.66	19.52
Q53YH3	Calreticulin	43	775	16	406	other biological processes	ER/Golgi	other molecular function		Calr	1.022	1.126	1.151	1.034	1.113	0.999628	0.999685	0.999991	0.994447	0.999838	9.54	7.2	17.13	8.66
Q9VAN0	Probable phosphoserine aminotransferase	52	441	16	364	other metabolic processes	other cell component	other molecular function	Serine biosynthesis		1.029	0.885	0.912	1.483	0.615	0.998656	0.991669	0.994562	0.000242928	0.992006	10.09	10.13	16.25	9.13
Q9V434	Asparagine--tRNA ligase	33	278	16	558	protein metabolism;RNA metabolism OR transcription;other metabolic processes	other cell component	nucleic acid binding activity;other molecular function		AsnRS	1.022	1.561	1.595	1.077	1.48	0.999813	0.988593	0.994562	0.957957	0.992006	18.87	19.63	23.95	16.38
Q9Y125	BcDNA.GH08312	17	328	16	953	other metabolic processes;other biological processes	non-structural extracellular;other cytoplasmic organelle;other cell component		Neutrophil degranulation; Glycosphingolipid metabolism; Platelet degranulation ; Surfactant metabolism	Sap-r	1.005	1.239	1.245	0.871	1.429	0.998656	0.991669	0.996701	0.533114	0.992006	8.36	12.34	20.97	10.53
Q9W0P5	UDP-glucose 4-epimerase	57	374	16	350	other metabolic processes;developmental processes	cytosol	other molecular function	Galactose catabolism	Gale	1.08	0.926	1	1.006	0.995	0.998656	0.991669	0.996106	0.994447	0.992006	6.52	9	5.3	5.83
Q7KK96	Structural maintenance of chromosomes protein	18	109	16	1179	cell cycle OR cell proliferation;cell organization and biogenesis;other biological processes	nucleus;other cell component	other molecular function	Condensation of Prometaphase Chromosomes	SMC2	1.273	1.208	1.538	1.172	1.312	0.677083	0.997109	0.994562	0.835779	0.992006	48.61	42.83	42.3	50.8
Q9V3Y4	LD43650p	62	442	16	316		other membranes;mitochondrion			Mtch	0.905	0.804	0.728	0.982	0.741	0.84099	0.988593	0.994562	0.994447	0.992006	12.36	17.04	10.3	18.5
A8DYJ3	Calpain-A, isoform C	34	234	16	828	protein metabolism		other molecular function		CalpA	1.065	0.912	0.971	1.03	0.943	0.998656	0.991669	0.994562	0.994447	0.992006	10.66	8.89	10.03	6.95
Q9VDZ7	Mitochondrial import inner membrane translocase subunit TIM44	38	224	16	459	cell organization and biogenesis;stress response;transport	other membranes;mitochondrion	other molecular function		CG117799	0.878	1.046	0.919	0.992	0.926	0.796575	0.991669	0.994562	0.994447	0.992006	15.44	6.9	8.69	9.1
P02517	Heat shock protein 26	87	674	16	208	stress response;other biological processes	cytosol	cytoskeletal activity;other molecular function	HSF1-dependent transactivation	Hsp26	1.943	1.379	2.679	1.211	2.213	1.55229e-07	0.991669	0.900717	0.30188	0.968262	53.76	37.49	63.77	46.51
Q9VD07	Uncharacterized protein	9	74	16	2059	RNA metabolism OR transcription;other metabolic processes	nucleus			Dmel\CG12499	0.931	2.363	2.201	1.008	2.185	0.998656	0.674937	0.994562	0.999871	0.992006	13.31	18.23	21.08	18.01
Q9W1V3	rRNA 2'-O-methyltransferase fibrillarin	48	445	16	344	protein metabolism;RNA metabolism OR transcription;other metabolic processes	nucleus;other cell component	nucleic acid binding activity;other molecular function	Major pathway of rRNA processing in the nucleolus and cytosol	Fib	1.017	1.363	1.386	0.931	1.489	0.999628	0.991669	0.994562	0.887842	0.992006	6.64	5.8	7.43	9.74
Q9VLK2	Ribosomal L1 domain-containing protein CG13096	25	234	16	681	RNA metabolism OR transcription;other metabolic processes	cytosol;translational apparatus	nucleic acid binding activity			0.684	2.311	1.581	0.891	1.775	0.091305	0.496405	0.994562	0.836124	0.992006	33.09	22.55	12.26	13.75
Q9VPN5	LD03220p	47	284	16	490		other cell component	other molecular function	HSP90 chaperone cycle for steroid hormone receptors (SHR) in the presence of ligand	Stip1	0.955	1.065	1.017	1.011	1.006	0.998656	0.997109	0.996106	0.999871	0.992006	12.41	12.62	8.41	22.9
Q7K3D4	Peptidylprolyl isomerase	42	244	16	397	other metabolic processes;stress response;other biological processes	other membranes;cytosol;mitochondrion;other cytoplasmic organelle;other cell component	other molecular function	Ub-specific processing proteases	zda	1.021	1.031	1.052	0.738	1.427	0.998656	0.991669	0.994562	0.0426294	0.992006	21.86	13.32	23.83	19.17
P84029	Cytochrome c-2	69	1695	16	108	other metabolic processes;other biological processes	other membranes;mitochondrion	other molecular function	Cytoprotection by HMOX1; TP53 Regulates Metabolic Genes; Detoxification of Reactive Oxygen Species; Respiratory electron transport; Release of apoptotic factors from the mitochondria; Formation of apoptosome; Pyroptosis	Cyt-c-p	0.986	0.835	0.823	1.029	0.8	0.998656	0.991669	0.994562	0.994447	0.992006	11.42	8.34	13.35	9.95
Q9V9W7	Rough deal	9	74	16	2089	cell cycle OR cell proliferation;cell organization and biogenesis;signal transduction;other biological processes	cytoskeleton;ER/Golgi;other cell component	other molecular function		rod	0.954	1.18	1.126	1.063	1.058	0.998656	0.999685	0.996701	0.993831	0.992006	6.07	12.89	11.79	11.97
Q9VLX0	Lysine ketoglutarate reductase	26	205	16	928	RNA metabolism OR transcription;other metabolic processes;other biological processes	cytosol;nucleus;other cell component	other molecular function	Lysine catabolism	LKRSDH	0.976	0.947	0.924	1.299	0.711	0.998656	0.991669	0.994562	0.187745	0.992006	20.07	18.6	17.99	19.25
Q9VZI3	Unc-112-related protein	31	245	16	708	cell adhesion;stress response;developmental processes;signal transduction	other cell component	signal transduction activity or receptor binding;other molecular function	RAC1 GTPase cycle; RAC3 GTPase cycle; Platelet degranulation ; Cell-extracellular matrix interactions	Fit1	1.036	0.907	0.94	0.94	1	0.999628	0.991669	0.994562	0.936959	0.992006	4.18	7.9	7.97	6.79
A4V4A5	GTP-binding nuclear protein	80	981	16	216	transport	nucleus	other molecular function		Ran	1.241	1.225	1.519	1.032	1.472	0.368878	0.991669	0.994562	0.994447	0.992006	22.8	15.08	19.65	16.12
A0A0B4LGZ6	Hyperplastic discs, isoform B	7	90	16	2887	protein metabolism;other metabolic processes;other biological processes		nucleic acid binding activity;other molecular function		hyd	0.95	1.307	1.242	0.684	1.815	0.998656	0.991669	0.999991	0.223898	0.992006	15.35	18.27	28.29	27.81
Q9VJG0	Xaa-Pro aminopeptidase ApepP	33	236	16	613	protein metabolism	cytosol	other molecular function		ApepP	1.26	1.012	1.275	0.944	1.351	0.551252	0.991669	0.997675	0.939467	0.992006	28.49	21.64	23.53	21.26
Q9VPH6	LP10922p	36	159	16	510	other metabolic processes	other cell component	other molecular function	Aspartate and asparagine metabolism; Degradation of cysteine and homocysteine	Dmel\CG5618	1.055	0.768	0.811	1.131	0.717	0.998656	0.911527	0.994562	0.861046	0.992006	21.04	15.16	18.05	8.43
Q9W4K1	AP-3 complex subunit beta	17	178	16	1160	cell organization and biogenesis;protein metabolism;other metabolic processes;transport;other biological processes	other membranes	other molecular function	Golgi Associated Vesicle Biogenesis	rb	0.914	1.285	1.175	0.692	1.698	0.917748	0.991669	0.996701	0.00748698	0.992006	35.53	28.32	51.41	19.63
O77410	Eukaryotic translation initiation factor 3 subunit E	43	338	16	435	cell organization and biogenesis;protein metabolism;other metabolic processes	ER/Golgi;translational apparatus;nucleus;other cell component	nucleic acid binding activity	L13a-mediated translational silencing of Ceruloplasmin expression; Translation initiation complex formation; Formation of a pool of free 40S subunits; Formation of the ternary complex, and subsequently, the 43S complex; Ribosomal scanning and start codon recognition	eIF3e	0.934	2.121	1.981	1.072	1.849	0.950637	0.809239	0.994562	0.963131	0.992006	11.64	9.2	24.01	17.83
Q7KML2	Probable peroxisomal acyl-coenzyme A oxidase 1	35	202	16	669	other metabolic processes;other biological processes	nucleus;other cytoplasmic organelle	other molecular function	alpha-linolenic acid (ALA) metabolism; Peroxisomal protein import; Beta-oxidation of pristanoyl-CoA; Synthesis of bile acids and bile salts via 7alpha-hydroxycholesterol; Beta-oxidation of very long chain fatty acids		1.001	1.394	1.396	1.207	1.157	0.998656	0.991669	0.994562	0.576874	0.999838	10.91	9.33	7.89	59.35
P98159	Serine protease nudel	8	79	16	2616	cell organization and biogenesis;protein metabolism;other metabolic processes;developmental processes;other biological processes	non-structural extracellular	other molecular function		ndl	1.421	1.237	1.758	0.946	1.859	0.287626	0.991669	0.994562	0.95321	0.992006	23.76	18.23	19.2	16.28
A8DYI6	Prohibitin	53	522	16	338	cell organization and biogenesis	other membranes;mitochondrion		Processing of SMDT1	Phb2	1.059	1.079	1.142	1.03	1.109	0.998656	0.999685	0.999991	0.994447	0.999838	10.18	10.64	11.47	2.28
Q9VY87	Cathepsin B1, isoform A	52	399	16	340	protein metabolism;other metabolic processes;other biological processes	non-structural extracellular;other cytoplasmic organelle	other molecular function	Neutrophil degranulation; MHC class II antigen presentation	CtsB	1.093	1.112	1.216	1.054	1.153	0.980388	0.999685	0.996701	0.980943	0.996548	13.31	13.46	11.45	8.86
P06605	Tubulin alpha-3 chain	71	3325	15	450	cell cycle OR cell proliferation;cell organization and biogenesis;other biological processes	cytoskeleton;other cell component	cytoskeletal activity;other molecular function	RHOH GTPase cycle; COPI-dependent Golgi-to-ER retrograde traffic; Kinesins; COPI-mediated anterograde transport; HSP90 chaperone cycle for steroid hormone receptors (SHR) in the presence of ligand; COPI-independent Golgi-to-ER retrograde traffic	alphaTub84D	1.157	0.902	1.044	0.993	1.051	0.721315	0.991669	0.996106	0.994447	0.993518	29.26	14.79	19.75	17.15
P40797	Protein peanut	38	173	15	539	cell cycle OR cell proliferation;cell organization and biogenesis;developmental processes;other biological processes	plasma membrane;other membranes;cytoskeleton;other cell component	cytoskeletal activity;other molecular function		pnut	1.151	1.254	1.443	0.953	1.514	0.968273	0.991669	0.994562	0.981479	0.992006	15.66	8.62	21.4	16.35
Q9W3M7	RNA helicase	29	306	15	945		nucleus;other cell component	nucleic acid binding activity;other molecular function		mahe	1.005	1.744	1.753	0.948	1.849	0.998656	0.888938	0.994562	0.964986	0.992006	13.08	17.54	23.92	21.01
Q9VV51	1-Acylglycerol-3-phosphate O-acyltransferase 3, isoform A	38	271	15	386		other membranes	other molecular function		Agpat3	0.825	1.058	0.873	1.202	0.726	0.51124	0.991669	0.994562	0.531692	0.992006	20.02	8.98	3.13	10.19
Q9VB96	Uncharacterized protein, isoform A	42	336	15	485			other molecular function		Dmel\CG31075	1.63	1.063	1.733	1.07	1.62	0.00936617	0.991669	0.994562	0.981479	0.992006	39.81	28.15	35.72	27.31
P15357	Ubiquitin-40S ribosomal protein S27a	71	869	15	156	protein metabolism;other metabolic processes	cytosol;translational apparatus;nucleus;other cell component	other molecular function	Antigen processing: Ubiquitination & Proteasome degradation; Neddylation; Iron uptake and transport; VLDLR internalisation and degradation; Downregulation of TGF-beta receptor signaling; TGF-beta receptor signaling in EMT (epithelial to mesenchymal transition); ABC-family proteins mediated transport; Cargo recognition for clathrin-mediated endocytosis; Aggrephagy; RAS processing; Peroxisomal prot…	RpS27A	1.029	1.045	1.075	0.964	1.115	0.998656	0.99616	0.996701	0.963131	0.999838	17.99	14.43	10	14.81
A0A0B4LHH1	Glycerol-3-phosphate acyltransferase 4, isoform E	52	203	15	380		other membranes	other molecular function		Gpat4	1.067	1.29	1.377	1.037	1.328	0.998656	0.991669	0.994562	0.994447	0.992006	6.29	13.01	11.74	16.3
Q9VGG9	RE35509p	12	97	15	1483	RNA metabolism OR transcription;other metabolic processes	other cell component	nucleic acid binding activity;other molecular function		CG14729	1.077	1.711	1.842	1.111	1.659	0.998656	0.967633	0.994562	0.939467	0.992006	19.6	12.29	23.15	21.13
M9MSN3	Diacylglycerol kinase	21	203	15	1009	other metabolic processes;signal transduction		kinase activity;other molecular function		rdgA	0.918	0.554	0.508	0.52	0.977	0.950637	0.458265	0.802972	5.01346e-08	0.992006	10.7	39.07	26.78	9.08
X2JEY9	Secretory 16, isoform J	9	108	15	2242	cell organization and biogenesis;other metabolic processes;stress response;transport;other biological processes	other membranes;ER/Golgi	other molecular function		Sec16	1.162	1.725	2.005	1.151	1.741	0.984445	0.938316	0.994562	0.931101	0.992006	18.59	15.16	27.06	15.05
M9PEY6	5'-3' exoribonuclease	24	189	15	908	RNA metabolism OR transcription;other metabolic processes	nucleus	nucleic acid binding activity;other molecular function		Rat1	0.983	1.585	1.559	1.098	1.42	0.998656	0.980994	0.994562	0.933682	0.992006	13.39	10.64	13.85	14.84
Q9VCU1	FI07649p	25	144	15	686	protein metabolism;other metabolic processes;developmental processes	plasma membrane;other membranes	other molecular function	Neutrophil degranulation; Physiological factors	Nepl15	0.806	0.793	0.639	1.05	0.608	0.591709	0.965462	0.955797	0.994447	0.921393	9.95	22.36	15.16	11.52
Q9W3N1	RH59310p	62	360	15	321	other biological processes	other membranes;ER/Golgi	other molecular function	Synthesis of very long-chain fatty acyl-CoAs; Androgen biosynthesis	spidey	0.775	1.467	1.137	1.067	1.066	0.128433	0.991669	0.999991	0.957957	0.994572	31.12	20.11	7.05	11.73
Q8IQX8	Histidine--tRNA ligase	34	157	15	564	protein metabolism;RNA metabolism OR transcription;other metabolic processes	mitochondrion;other cell component	other molecular function		HisRS	1.208	1.391	1.681	1.001	1.68	0.587829	0.991669	0.994562	0.994447	0.992006	28.34	29.89	30.31	21.35
Q9VXE6	Nuclear pore complex protein Nup153	14	72	15	1883	cell organization and biogenesis;stress response;transport;other biological processes	other membranes;cytoskeleton;nucleus;other cell component	nucleic acid binding activity;other molecular function	Transport of the SLBP independent Mature mRNA; Transport of the SLBP Dependant Mature mRNA; Transport of Mature mRNA Derived from an Intronless Transcript; Transport of Mature mRNA derived from an Intron-Containing Transcript; Nuclear Pore Complex (NPC) Disassembly; Regulation of HSF1-mediated heat shock response; SUMOylation of SUMOylation proteins; SUMOylation of chromatin organization proteins…	Nup153	1.211	1.888	2.286	1.148	1.992	0.933514	0.914961	0.987592	0.939976	0.992006	45.32	28.54	36.82	27.1
Q9U1L2	EG:BACR7A4.14 protein	80	413	15	251	other metabolic processes		other molecular function		EG:BACR7A4.14	1.262	2.194	2.769	1.653	1.676	0.294666	0.769034	0.877273	9.94703e-07	0.992006	23.34	11.07	20.57	13.75
Q8IRG6	FACT complex subunit spt16	17	205	15	1083	DNA metabolism;RNA metabolism OR transcription;other metabolic processes;stress response;other biological processes	cytosol;nucleus;other cell component	other molecular function	Regulation of TP53 Activity through Phosphorylation; Formation of RNA Pol II elongation complex ; RNA Polymerase II Pre-transcription Events; TP53 Regulates Transcription of DNA Repair Genes	dre4	1.746	1.341	2.341	1.126	2.078	0.00973278	0.991669	0.936866	0.91408	0.992006	50.26	29.63	36.16	33.8
P41073	Zinc finger protein on ecdysone puffs	26	209	15	716	RNA metabolism OR transcription;other metabolic processes;other biological processes	nucleus;other cell component	nucleic acid binding activity;other molecular function		Pep	1.058	1.366	1.445	1.016	1.422	0.998656	0.991669	0.994562	0.999436	0.992006	8.34	7.28	12.46	9.2
Q0KI98	Tryptophanyl-tRNA synthetase	43	185	15	430	cell organization and biogenesis;protein metabolism;RNA metabolism OR transcription;other metabolic processes;developmental processes	other cell component	other molecular function		TrpRS	0.555	3.521	1.953	1.025	1.905	6.78353e-05	0.0841379	0.994562	0.994447	0.992006	39.01	19.47	11.97	18.22
M9PH10	Vesicle-fusing ATPase	38	347	15	745	cell organization and biogenesis;transport	other cell component	other molecular function		comt	0.939	0.828	0.777	0.912	0.851	0.983502	0.973991	0.994562	0.859639	0.992006	7.16	6.68	6.91	7.12
B6IDY5	CYP6G1	32	167	15	524		other membranes	other molecular function		Cyp6g1	1.219	1.17	1.427	0.879	1.623	0.792073	0.997109	0.994562	0.833515	0.992006	15.35	8.48	20.47	8.68
E2QD63	Hsc/Hsp70-interacting protein related, isoform B	40	341	15	377			other molecular function		HIP-R	1.472	1.374	2.022	0.961	2.105	0.0103518	0.991669	0.994562	0.963131	0.992006	34.93	19.17	32.82	25.08
M9PCA6	Acid beta-galactosidase	35	163	15	670	other metabolic processes	other membranes;other cytoplasmic organelle	other molecular function		Gal	1.104	0.813	0.898	0.806	1.113	0.998656	0.977097	0.994562	0.44609	0.996032	29.58	18.29	11.57	14.79
A0A0B4KG54	S-methyl-5'-thioadenosine phosphorylase	56	222	15	360	other metabolic processes	nucleus;other cell component	other molecular function		Mtap	1.011	1.697	1.715	1.028	1.668	0.998656	0.938316	0.994562	0.994447	0.992006	48.49	51.57	16.04	74.23
A0A0B4LGD3	Kazachoc, isoform G	17	254	15	1077	cell-cell signaling;cell organization and biogenesis;transport;other biological processes	other cell component	transporter activity	Cation-coupled Chloride cotransporters	kcc	0.779	0.872	0.68	0.85	0.8	0.142807	0.991669	0.994562	0.324305	0.992006	27.31	19.67	11.07	21.22
P15372	Phosrestin-2	57	173	15	364	transport;signal transduction;other biological processes	other cell component	signal transduction activity or receptor binding;other molecular function	Golgi Associated Vesicle Biogenesis; Cargo recognition for clathrin-mediated endocytosis; Ub-specific processing proteases; Lysosome Vesicle Biogenesis; G alpha (s) signalling events; MAP2K and MAPK activation; Thrombin signalling through proteinase activated receptors (PARs)	Arr1	0.74	0.808	0.598	1.096	0.545	0.205643	0.939341	0.936866	0.939976	0.757592	10.1	42.21	24.92	13.4
Q9W3Y3	Calcyclin-binding protein	53	217	15	230	developmental processes	nucleus;other cell component	cytoskeletal activity;other molecular function		Dmel\CG3226	1.257	1.005	1.263	0.946	1.335	0.44098	0.991669	0.997675	0.936959	0.992006	24.27	18.55	15.94	14.42
Q9VMF0	FI04444p	49	285	15	424			other molecular function		Dmel\CG9498	0.909	1.182	1.075	1.805	0.595	0.922712	0.999685	0.996106	2.69912e-06	0.968262	35.68	34.08	17.79	20.27
A0A0B4K6K7	E3 UFM1-protein ligase 1 homolog	25	180	15	782	protein metabolism;other metabolic processes		other molecular function		Ufl1	0.975	1.779	1.735	1.184	1.465	0.998656	0.888938	0.994562	0.716979	0.992006	5.88	9.45	17.87	12.79
Q9W0M7	Splicing factor 3B subunit 3	16	88	15	1227	RNA metabolism OR transcription;other metabolic processes	nucleus;other cell component	nucleic acid binding activity	mRNA Splicing - Major Pathway; mRNA Splicing - Minor Pathway	Sf3b3	1.262	1.214	1.532	1.129	1.356	0.729166	0.999685	0.994562	0.931101	0.992006	32.14	14.04	16.44	85.67
P21521	Synaptotagmin 1	37	225	15	474	cell-cell signaling;transport;other biological processes	plasma membrane;other membranes;ER/Golgi;other cell component	other molecular function	Serotonin Neurotransmitter Release Cycle; Norepinephrine Neurotransmitter Release Cycle; Glutamate Neurotransmitter Release Cycle; Dopamine Neurotransmitter Release Cycle; Acetylcholine Neurotransmitter Release Cycle; GABA synthesis, release, reuptake and degradation; Cargo recognition for clathrin-mediated endocytosis	Syt1	1.025	0.88	0.902	0.918	0.983	0.999628	0.988593	0.994562	0.918729	0.992006	7.93	8.62	9.01	13.25
Q9VCN1	DNA polymerase epsilon catalytic subunit 1	10	82	15	2236	cell cycle OR cell proliferation;DNA metabolism;other metabolic processes;stress response	nucleus	nucleic acid binding activity;other molecular function	Dual incision in TC-NER; Dual Incision in GG-NER; Activation of the pre-replicative complex; Recognition of DNA damage by PCNA-containing replication complex; PCNA-Dependent Long Patch Base Excision Repair; Termination of translesion DNA synthesis; DNA replication initiation	PolE1	1.477	1.028	1.518	1.124	1.352	0.148546	0.991669	0.994562	0.910312	0.992006	27.58	22.28	23.09	16.13
Q9VKM7	AT01533p	21	536	15	677	stress response	other membranes;ER/Golgi			CG6089	1.019	1.841	1.875	1.126	1.666	0.999628	0.909462	0.994562	0.787706	0.992006	8.74	11.07	19.2	17.64
Q9V6U9	Enoyl-[acyl-carrier-protein] reductase, mitochondrial	45	366	15	357	other metabolic processes	mitochondrion	other molecular function	Beta oxidation of decanoyl-CoA to octanoyl-CoA-CoA		1.061	0.993	1.053	1.014	1.039	0.998656	0.991669	0.996106	0.999871	0.993518	3.19	6.79	3.96	4.03
Q8IQV1	3'-phosphoadenosine-5'-phosphosulfate synthase	34	139	15	657	other metabolic processes		kinase activity;other molecular function	Transport and synthesis of PAPS	Papss	0.806	1.162	0.936	1.011	0.926	0.498853	0.99616	0.994562	0.995998	0.992006	13.5	22.57	13.9	11.45
Q23983	Alpha-soluble NSF attachment protein	66	191	15	292	cell-cell signaling;cell cycle OR cell proliferation;cell organization and biogenesis;transport;developmental processes	other membranes;other cell component	other molecular function	COPII-mediated vesicle transport; COPI-dependent Golgi-to-ER retrograde traffic; Retrograde transport at the Trans-Golgi-Network; Intra-Golgi traffic; COPI-mediated anterograde transport	alphaSnap	1.139	0.847	0.965	0.955	1.011	0.984445	0.973991	0.994562	0.963131	0.992006	26.29	17.72	16.13	14
Q9VL01	FI06461p	47	145	15	406	protein metabolism	non-structural extracellular			c-SPH35	0.908	0.861	0.782	1.018	0.769	0.934555	0.982739	0.994562	0.999871	0.992006	31.27	26.08	20.96	25.69
A4V2B8	Casein kinase IIalpha, isoform C	52	295	15	336	protein metabolism;other metabolic processes		kinase activity;other molecular function		CkIIalpha	0.98	1.451	1.422	0.92	1.546	0.998656	0.991669	0.994562	0.920963	0.992006	18.91	17.59	12.77	12.11
Q9VAL7	Calnexin 99A, isoform A	32	221	15	605	protein metabolism;other metabolic processes;stress response;other biological processes	other membranes;ER/Golgi	other molecular function	Calnexin/calreticulin cycle	Cnx99A	0.965	1.328	1.282	1.073	1.194	0.998656	0.991669	0.996106	0.963131	0.9991	5.03	7.75	9.12	7.37
Q7JVI3	Eukaryotic translation initiation factor 3 subunit M	48	285	15	387	cell organization and biogenesis;protein metabolism;other metabolic processes;transport;developmental processes;other biological processes	cytosol;cytoskeleton;ER/Golgi;translational apparatus;other cell component	nucleic acid binding activity;other molecular function	L13a-mediated translational silencing of Ceruloplasmin expression; Formation of a pool of free 40S subunits; Translation initiation complex formation; Formation of the ternary complex, and subsequently, the 43S complex; Ribosomal scanning and start codon recognition	eIF3m	1.221	1.327	1.62	1.051	1.541	0.653329	0.991669	0.994562	0.994447	0.992006	18.52	15.31	20.58	20.06
M9PF46	Ribose-phosphate diphosphokinase	41	248	15	373	other metabolic processes	other cell component	kinase activity;other molecular function		Prps	1.064	1.117	1.189	0.946	1.257	0.998656	0.999685	0.9983	0.939976	0.993518	10.66	8.02	22.27	19.66
A4V4F2	Flotillin 2, isoform F	47	165	15	425		other membranes			Flo2	1.072	0.684	0.733	1.049	0.699	0.998656	0.869247	0.994562	0.994447	0.992006	12.35	22.46	15.11	17.29
Q9VAW3	Glutamine--fructose-6-phosphate transaminase (isomerizing)	28	193	15	683	protein metabolism;other metabolic processes		other molecular function	Synthesis of UDP-N-acetyl-glucosamine	Gfat2	1.045	1.554	1.623	0.997	1.628	0.999628	0.973991	0.994562	0.994447	0.992006	38.71	17.67	9.85	15.12
Q8IQH0	FI12817p	15	136	15	1284		other membranes;other cell component			Nrx-IV	0.993	0.877	0.871	1.035	0.841	0.998656	0.988593	0.994562	0.994447	0.992006	7.97	18.59	11.74	5.37
Q9V3Z4	GH11341p	28	344	15	502	protein metabolism;other metabolic processes	cytosol;nucleus;other cell component		Neutrophil degranulation; Antigen processing: Ubiquitination & Proteasome degradation; Neddylation; Regulation of RAS by GAPs; ABC-family proteins mediated transport; Degradation of beta-catenin by the destruction complex; Ub-specific processing proteases; Activation of NF-kappaB in B cells; Oxygen-dependent proline hydroxylation of Hypoxia-inducible Factor Alpha; Cross-presentation of soluble ex…	Rpn5	0.991	1.918	1.901	0.982	1.936	0.998656	0.869247	0.994562	0.994447	0.992006	21.54	25.09	31.41	11.07
Q95029	Cathepsin L	44	410	15	371	protein metabolism;other metabolic processes;other biological processes	non-structural extracellular;other cytoplasmic organelle;other cell component	other molecular function	Neutrophil degranulation; MHC class II antigen presentation; Surfactant metabolism	Cp1	1.51	1.522	2.299	1.136	2.025	0.0049853	0.988771	0.964289	0.727669	0.992006	40.56	25.68	33.12	24.21
Q9VC63	FI20190p1	15	129	15	1402	transport	other membranes	transporter activity;other molecular function	Platelet degranulation ; Paracetamol ADME; ABC-family proteins mediated transport; Cargo recognition for clathrin-mediated endocytosis; Aggrephagy; Azathioprine ADME	Cftr	0.91	1.121	1.021	1.2	0.851	0.932059	0.999685	0.994562	0.611543	0.992006	21.14	14.54	27.57	45.05
P81900	cAMP-dependent protein kinase type II regulatory subunit	49	237	15	377	cell organization and biogenesis;developmental processes;other biological processes	other cell component	other molecular function	Factors involved in megakaryocyte development and platelet production; Vasopressin regulates renal water homeostasis via Aquaporins; PKA activation; Hedgehog 'off' state; PKA activation in glucagon signalling; DARPP-32 events; CREB1 phosphorylation through the activation of Adenylate Cyclase; GPER1 signaling	Pka-R2	1.174	0.913	1.072	0.982	1.092	0.835822	0.991669	0.996106	0.994447	0.993518	20.14	9.34	11.33	14.48
Q7K5N8	GH01592p	56	277	15	390	protein metabolism;other metabolic processes;other biological processes	non-structural extracellular;other cytoplasmic organelle	other molecular function		BEST:GH19547	0.954	0.828	0.79	1.074	0.735	0.998656	0.991669	0.994562	0.939976	0.992006	8.94	11.77	11.28	7.59
Q9VW09	E3 ubiquitin-protein ligase listerin	12	68	15	1747	protein metabolism;other metabolic processes	cytosol;other cell component	translation activity;other molecular function	Antigen processing: Ubiquitination & Proteasome degradation	Ltn1	1.086	1.506	1.635	0.85	1.923	0.998656	0.991669	0.994562	0.835779	0.992006	23.76	9.7	33.87	24.37
Q9U915	Adenylate kinase	66	419	15	240	other metabolic processes	cytosol;mitochondrion;other cell component	kinase activity;other molecular function	Interconversion of nucleotide di- and triphosphates	Adk2	1.028	1.254	1.289	1.053	1.224	0.998656	0.991669	0.996106	0.98406	0.992006	9.95	15.13	8.78	11.75
Q9VPY2	Phospholipase A2 activator protein, isoform A	27	159	15	787	protein metabolism;other metabolic processes;other biological processes	nucleus;other cell component	other molecular function		Plap	1.197	1.542	1.845	1.05	1.758	0.867295	0.953225	0.994562	0.994447	0.992006	24.93	14.44	25.36	17.5
Q01637	Uridine 5'-monophosphate synthase	40	176	15	493	other metabolic processes		other molecular function	Pyrimidine biosynthesis	r-l	1.19	1.378	1.64	1.036	1.582	0.908957	0.991669	0.994562	0.994447	0.992006	25.46	19.69	31.96	18.32
Q9VVU2	GEO07453p1	62	392	15	149	protein metabolism;other metabolic processes;other biological processes	cytosol;translational apparatus	nucleic acid binding activity;other molecular function	Nonsense Mediated Decay (NMD) enhanced by the Exon Junction Complex (EJC); L13a-mediated translational silencing of Ceruloplasmin expression; Formation of a pool of free 40S subunits; Nonsense Mediated Decay (NMD) independent of the Exon Junction Complex (EJC); SRP-dependent cotranslational protein targeting to membrane; GTP hydrolysis and joining of the 60S ribosomal subunit	RpL26	1.014	1.625	1.648	0.915	1.802	0.999628	0.973991	0.994562	0.805557	0.992006	13.45	10.39	18.86	16.87
Q24008	Inactivation-no-after-potential D protein	27	216	15	674	signal transduction;other biological processes	plasma membrane;other membranes;other cell component	cytoskeletal activity;other molecular function		inaD	0.816	0.75	0.612	0.731	0.837	0.570229	0.901875	0.941888	0.0391686	0.992006	16.36	11.38	11.32	10.48
Q9VKI8	GH03305p	54	574	15	332			other molecular function	Serine biosynthesis	GH26	1.023	1.086	1.11	1.157	0.959	0.999039	0.999685	0.997675	0.5989	0.992006	25.25	10.52	13.61	11.19
Q8MLN4	Uncharacterized protein, isoform D	27	259	15	840		other membranes			Dmel\CG9380	1.033	0.836	0.863	1.083	0.797	0.999628	0.976218	0.994562	0.948353	0.992006	12.94	4.9	3.34	12.08
Q9XZ61	Ubiquitin carboxyl-terminal hydrolase	47	289	15	324	cell organization and biogenesis;protein metabolism;other metabolic processes;other biological processes	cytosol;nucleus;other cell component	other molecular function	UCH proteinases; Ubiquitination and proteolysis of phosphorylated CI; Degradation of NF-kappa-B inhibitor, CACT; Ubiquitination and degradation of phosphorylated ARM; Nuclear CI is degraded; Degradation of TIM; Degradation of PER; Degradation of CRY	Uch-L5	1.332	1.813	2.416	1.291	1.871	0.246172	0.911527	0.951763	0.22221	0.992006	42.3	27.04	39.98	26.1
Q9VLY7	GH05679p	14	95	15	1469	stress response	non-structural extracellular	enzyme regulator activity	Neutrophil degranulation; Platelet degranulation ; Regulation of Insulin-like Growth Factor (IGF) transport and uptake by Insulin-like Growth Factor Binding Proteins (IGFBPs); Post-translational protein phosphorylation; Degradation of the extracellular matrix; Regulation of Complement cascade; Alternative complement activation; Activation of C3 and C5	Tep3	0.888	0.948	0.842	0.953	0.883	0.826997	0.991669	0.994562	0.963131	0.992006	25.53	15.1	8.2	6.29
P80455	40S ribosomal protein S12	69	412	15	139	protein metabolism;other metabolic processes;other biological processes	cytosol;translational apparatus	other molecular function	Nonsense Mediated Decay (NMD) enhanced by the Exon Junction Complex (EJC); L13a-mediated translational silencing of Ceruloplasmin expression; Translation initiation complex formation; Formation of a pool of free 40S subunits; Formation of the ternary complex, and subsequently, the 43S complex; Ribosomal scanning and start codon recognition; Nonsense Mediated Decay (NMD) independent of the Exon Ju…	RpS12	1.018	1.348	1.372	0.94	1.46	0.999628	0.991669	0.994562	0.931101	0.992006	10.86	5.05	16.67	12.88
Q9I7T7	La-related protein Larp4B	17	155	15	1531	other biological processes	cytosol;other cell component	nucleic acid binding activity		Larp4B	1.726	1.863	3.215	1.049	3.064	0.191229	0.965462	0.735135	0.994447	0.582746	45.04	39.88	42.67	67.93
P91679	Peptide transporter family 1	27	84	15	743	transport	plasma membrane;other membranes	transporter activity	Proton/oligopeptide cotransporters	yin	1.727	1.346	2.325	1.078	2.157	0.00981226	0.991669	0.877273	0.973833	0.892488	45.53	40.16	6.27	8.29
E1JHJ9	Cytoplasmic linker protein 190, isoform M	17	250	14	1668		cytoskeleton			CLIP-190	0.967	0.986	0.954	1.026	0.93	0.998656	0.991669	0.994562	0.994447	0.992006	41.79	66.5	53.89	50.46
Q7JVX3	LD41739p	40	123	14	467	protein metabolism	non-structural extracellular	other molecular function		BEST:GH09055	1.184	1.561	1.849	1.037	1.783	0.908286	0.973991	0.994562	0.994447	0.992006	32.1	17.66	26.43	18.76
P45437	Coatomer subunit beta	19	205	14	964	transport;other biological processes	other membranes;ER/Golgi	other molecular function	Neutrophil degranulation; COPI-dependent Golgi-to-ER retrograde traffic; COPI-mediated anterograde transport	betaCOP	1.068	1.589	1.697	1.07	1.585	0.998656	0.969321	0.994562	0.964986	0.992006	14.7	11.75	13.63	12.01
P05389	60S acidic ribosomal protein P2	72	1093	14	113	protein metabolism;other metabolic processes	cytosol;translational apparatus	other molecular function	Nonsense Mediated Decay (NMD) enhanced by the Exon Junction Complex (EJC); L13a-mediated translational silencing of Ceruloplasmin expression; Formation of a pool of free 40S subunits; Nonsense Mediated Decay (NMD) independent of the Exon Junction Complex (EJC); SRP-dependent cotranslational protein targeting to membrane; GTP hydrolysis and joining of the 60S ribosomal subunit	RpLP2	1.076	2.242	2.413	1.11	2.174	0.998656	0.738852	0.955797	0.842234	0.983761	9.99	25.67	28.84	24.79
Q9VZ20	Dynein light intermediate chain	30	146	14	493	cell organization and biogenesis;transport;developmental processes;other biological processes	cytoskeleton;other cell component	other molecular function	COPI-independent Golgi-to-ER retrograde traffic; Neutrophil degranulation; Aggrephagy; COPI-mediated anterograde transport; HSP90 chaperone cycle for steroid hormone receptors (SHR) in the presence of ligand	Dlic	0.977	1.26	1.231	1.096	1.123	0.998656	0.991669	0.997675	0.936959	0.996596	10.08	14.16	9.33	11.46
A0A0B4JD97	Transforming acidic coiled-coil protein, isoform K	12	107	14	1322	cell cycle OR cell proliferation;cell organization and biogenesis;transport;developmental processes;other biological processes	cytoskeleton;other cell component	cytoskeletal activity		tacc	1.616	1.353	2.186	0.919	2.38	0.125968	0.991669	0.969822	0.936959	0.871593	58.17	32.06	36.96	34.19
Q9W2J4	UDP-glucuronosyltransferase	30	303	14	532		other membranes;ER/Golgi	other molecular function	Glycosphingolipid metabolism; Paracetamol ADME; Prednisone ADME	Ugt49B1	0.994	1.017	1.011	1.281	0.789	0.998656	0.991669	0.994562	0.169951	0.992006	11.67	10.01	14.89	17.11
Q7KY08	Argonaute protein	23	103	14	950	cell cycle OR cell proliferation;cell organization and biogenesis;RNA metabolism OR transcription;other metabolic processes;developmental processes;other biological processes	nucleus;other cell component	nucleic acid binding activity;other molecular function		AGO1	1.001	1.005	1.006	0.985	1.021	0.998656	0.991669	0.994562	0.994447	0.992006	13.13	22.79	13.92	25.15
P52304	Serine/threonine-protein kinase polo	34	126	14	576	cell cycle OR cell proliferation;cell organization and biogenesis;protein metabolism;other metabolic processes;transport;developmental processes;other biological processes	cytosol;cytoskeleton;nucleus;other cell component	kinase activity;other molecular function	Resolution of Sister Chromatid Cohesion; Regulation of PLK1 Activity at G2/M Transition; Cyclin A/B1/B2 associated events during G2/M transition; Phosphorylation of the APC/C; Phosphorylation of Emi1; APC/C:Cdh1 mediated degradation of Cdc20 and other APC/C:Cdh1 targeted proteins in late mitosis/early G1; Golgi Cisternae Pericentriolar Stack Reorganization; Polo-like kinase mediated events; Mitot…	polo	1.35	1.54	2.079	1.055	1.97	0.413062	0.976218	0.964289	0.994447	0.983761	44.35	34.63	53.18	26.64
A0A0B4KGH0	Dystrophin, isoform K	8	35	14	3144	cell organization and biogenesis;other biological processes	plasma membrane;other membranes;cytoskeleton;other cell component	cytoskeletal activity;other molecular function		Dys	1.364	1.476	2.013	1.166	1.726	0.819678	0.991669	0.994562	0.962625	0.992006	38.17	29.06	34.68	51.15
X2JA43	Nucleostemin 3, isoform B	34	88	14	606			other molecular function		Ns3	0.971	2.146	2.084	1.126	1.851	0.998656	0.809239	0.994562	0.936959	0.992006	10.83	7.03	19.9	10.52
A0A0B4LHD7	Na/Ca-exchange protein, isoform H	16	216	14	955	transport;signal transduction;other biological processes	plasma membrane;other membranes	transporter activity;other molecular function		Calx	1.252	0.803	1.005	0.899	1.118	0.687131	0.947619	0.994562	0.835779	0.999838	18.88	10.6	11.06	8.06
Q0E9F9	FI16720p1	37	244	14	453	protein metabolism	non-structural extracellular;other cell component	other molecular function		Dmel\CG2915	1.094	1.35	1.476	1.155	1.278	0.998656	0.991669	0.994562	0.79437	0.993518	7.51	8.7	12.52	7.42
Q7KUC2	Pyridoxal kinase	52	284	14	304	other metabolic processes;other biological processes	cytosol;other cell component	kinase activity	Neutrophil degranulation; Vitamins B6 activation to pyridoxal phosphate	Pdxk	0.828	1.186	0.982	1.068	0.92	0.447489	0.997519	0.994562	0.955269	0.992006	26.28	11.49	5.99	10.75
Q9VJH2	Aspartyl-tRNA synthetase, mitochondrial, isoform A	16	127	14	1082	protein metabolism;RNA metabolism OR transcription;other metabolic processes	mitochondrion	nucleic acid binding activity;other molecular function		AspRS-m	0.996	1.313	1.308	1.102	1.186	0.998656	0.991669	0.996106	0.957957	0.996032	13.72	7.81	22.08	13.92
O97428	Ciboulot, isoform A	88	208	14	129	cell organization and biogenesis;developmental processes	cytosol;cytoskeleton	cytoskeletal activity		cib	2.065	0.888	1.834	1.006	1.823	3.8482e-08	0.991669	0.994562	0.994447	0.992006	66.97	44.41	56.84	49.75
P50882	60S ribosomal protein L9	77	641	14	190	protein metabolism;other metabolic processes	cytosol;translational apparatus	nucleic acid binding activity;other molecular function	Nonsense Mediated Decay (NMD) enhanced by the Exon Junction Complex (EJC); L13a-mediated translational silencing of Ceruloplasmin expression; Formation of a pool of free 40S subunits; Nonsense Mediated Decay (NMD) independent of the Exon Junction Complex (EJC); SRP-dependent cotranslational protein targeting to membrane; GTP hydrolysis and joining of the 60S ribosomal subunit	RpL9	0.965	2.22	2.142	0.982	2.18	0.998656	0.755482	0.994562	0.994447	0.982968	18.75	15.47	21.92	22.92
Q9VK45	Serine/threonine-protein kinase Tor	8	82	14	2470	cell cycle OR cell proliferation;cell organization and biogenesis;protein metabolism;other metabolic processes;transport;developmental processes;signal transduction;other biological processes	nucleus;other cell component	nucleic acid binding activity;kinase activity;other molecular function	HSF1-dependent transactivation; Macroautophagy; Regulation of PTEN gene transcription; VEGFR2 mediated vascular permeability; Energy dependent regulation of mTOR by LKB1-AMPK; TP53 Regulates Metabolic Genes; Amino acids regulate mTORC1; mTORC1-mediated signalling; PIP3 activates AKT signaling; CD28 dependent PI3K/Akt signaling	Tor	0.963	0.925	0.89	1.072	0.83	0.998656	0.991669	0.994562	0.993831	0.992006	23.18	24.51	23.08	13.28
Q95TL8	LD41494p	27	231	14	412	other biological processes	other membranes;ER/Golgi	other molecular function	Neutrophil degranulation	ERp44	1.035	1.434	1.484	0.927	1.601	0.998656	0.991669	0.994562	0.927844	0.992006	10.45	9.21	9.95	11.1
Q9W2G8	Acyl-coenzyme A oxidase	32	153	14	677	other metabolic processes;other biological processes	other cytoplasmic organelle	other molecular function	Peroxisomal protein import; Beta-oxidation of pristanoyl-CoA; Synthesis of bile acids and bile salts via 7alpha-hydroxycholesterol	Acox57D-d	1.036	1.249	1.294	1.223	1.058	0.999628	0.991669	0.994562	0.551344	0.992762	19.91	19.09	32.79	14.66
P17704	40S ribosomal protein S17	83	909	14	131	protein metabolism;other metabolic processes	cytosol;translational apparatus	other molecular function	Nonsense Mediated Decay (NMD) enhanced by the Exon Junction Complex (EJC); L13a-mediated translational silencing of Ceruloplasmin expression; Translation initiation complex formation; Formation of a pool of free 40S subunits; Formation of the ternary complex, and subsequently, the 43S complex; Ribosomal scanning and start codon recognition; Nonsense Mediated Decay (NMD) independent of the Exon Ju…	RpS17	1.078	1.679	1.809	0.971	1.864	0.998656	0.95783	0.994562	0.976694	0.992006	12.62	10.07	19.72	15.52
Q9VXK6	Eukaryotic translation initiation factor 5	32	217	14	464	cell organization and biogenesis;protein metabolism;other metabolic processes	cytosol	enzyme regulator activity;nucleic acid binding activity;other molecular function	Ribosomal scanning and start codon recognition	eIF5	1.089	1.834	1.997	1.22	1.637	0.998656	0.888938	0.994562	0.513757	0.992006	15.83	7.59	26.41	20.52
Q9VKZ7	Nicalin	25	177	14	561	other biological processes	other membranes;ER/Golgi			Q9VKZ7_DROME	0.918	1.974	1.813	1.158	1.565	0.945423	0.782552	0.994562	0.804687	0.992006	7.66	8.77	18.26	21.83
Q9VN93	Putative cysteine proteinase CG12163	30	259	14	614	protein metabolism;other metabolic processes	non-structural extracellular;other cytoplasmic organelle;other cell component	other molecular function	Platelet degranulation ; MHC class II antigen presentation		1.056	1.535	1.621	0.917	1.769	0.998656	0.988593	0.994562	0.902314	0.992006	23.4	27.2	10.88	29.04
P48159	60S ribosomal protein L23	66	1675	14	140	protein metabolism;other metabolic processes	cytosol;translational apparatus	cytoskeletal activity;nucleic acid binding activity;other molecular function	Nonsense Mediated Decay (NMD) enhanced by the Exon Junction Complex (EJC); L13a-mediated translational silencing of Ceruloplasmin expression; Formation of a pool of free 40S subunits; Nonsense Mediated Decay (NMD) independent of the Exon Junction Complex (EJC); SRP-dependent cotranslational protein targeting to membrane; GTP hydrolysis and joining of the 60S ribosomal subunit	RpL23	0.97	2.064	2.002	1.073	1.866	0.998656	0.827892	0.994562	0.939976	0.992006	12	9.48	13.89	15.32
Q9W373	SET and MYND domain containing, arthropod-specific, member 9, isoform A	42	219	14	500	protein metabolism;other metabolic processes;other biological processes	nucleus;other cell component	other molecular function		SmydA-9	1.022	0.79	0.807	0.971	0.831	0.999039	0.936111	0.994562	0.989454	0.992006	13.31	16.22	14.15	9.98
Q7K3W2	Alpha-MPP	35	184	14	556	cell organization and biogenesis;protein metabolism;other metabolic processes;transport	other membranes;mitochondrion	other molecular function	Processing of SMDT1	Dmel\CG8728	1.278	0.999	1.276	0.971	1.314	0.619336	0.991669	0.996106	0.993831	0.992006	27.88	14.97	29.78	22.3
Q9W058	Succinyl-CoA:3-ketoacid-coenzyme A transferase, mitochondrial	44	244	14	516	other metabolic processes	mitochondrion	other molecular function	Utilization of Ketone Bodies	SCOT	1.116	1.016	1.134	1.204	0.942	0.984445	0.991669	0.996106	0.531692	0.992006	8.17	9.38	2.09	5.96
Q9V461	DNA replication licensing factor Mcm6	20	119	14	817	cell cycle OR cell proliferation;cell organization and biogenesis;DNA metabolism;other metabolic processes;stress response;other biological processes	nucleus;other cell component	nucleic acid binding activity;other molecular function	Orc1 removal from chromatin; Assembly of the pre-replicative complex; Activation of ATR in response to replication stress; Activation of the pre-replicative complex	Mcm6	1.813	1.078	1.955	1.146	1.705	6.25081e-06	0.997109	0.994562	0.764654	0.992006	40.26	30.36	41.34	35.06
X2JGF5	Stoned B, isoform G	15	120	14	1262	transport;other biological processes	other cell component			stnB	0.93	0.704	0.655	0.854	0.768	0.984445	0.888938	0.964289	0.612069	0.992006	18.94	15.35	15.75	7.9
Q9VNE9	60S ribosomal protein L13a	42	521	14	205	protein metabolism;other metabolic processes;other biological processes	cytosol;translational apparatus	nucleic acid binding activity;other molecular function	Nonsense Mediated Decay (NMD) enhanced by the Exon Junction Complex (EJC); L13a-mediated translational silencing of Ceruloplasmin expression; Formation of a pool of free 40S subunits; Nonsense Mediated Decay (NMD) independent of the Exon Junction Complex (EJC); SRP-dependent cotranslational protein targeting to membrane; GTP hydrolysis and joining of the 60S ribosomal subunit	RpL13A	0.981	1.978	1.941	0.965	2.011	0.998656	0.869247	0.994562	0.963131	0.992006	3.5	5	14.15	13.35
Q9VYI6	Coenzyme Q8	32	144	14	661	other metabolic processes	other membranes;mitochondrion	kinase activity;other molecular function		Coq8	0.963	0.974	0.938	1.099	0.854	0.998656	0.991669	0.994562	0.936959	0.992006	11.78	9.89	11.35	7.58
Q9V3D8	GH27579p	39	177	14	558	protein metabolism	other cell component	other molecular function		grsm	1.016	1.268	1.288	0.97	1.328	0.999628	0.991669	0.996701	0.976694	0.992006	8.74	18.44	14.17	10.51
Q9V7Y2	Sphingosine-1-phosphate lyase	36	255	14	545	other metabolic processes;other biological processes	other membranes;ER/Golgi	other molecular function	Sphingolipid de novo biosynthesis	Sply	0.991	1.273	1.262	1.072	1.177	0.998656	0.991669	0.996921	0.963131	0.999838	13.17	12.01	14.76	9.8
Q7KNR7	Photoreceptor dehydrogenase, isoform C	51	462	14	261	other metabolic processes	other cell component	other molecular function		Pdh	0.913	0.858	0.783	0.948	0.827	0.861015	0.991669	0.994562	0.933682	0.992006	15.04	22.41	14.28	13.38
P10676	Neither inactivation nor afterpotential protein C	45	966	14	1501	cell organization and biogenesis;protein metabolism;other metabolic processes;transport;signal transduction;other biological processes	plasma membrane;other membranes;cytoskeleton;nucleus;other cell component	cytoskeletal activity;kinase activity;other molecular function		ninaC	0.945	0.606	0.573	0.584	0.981	0.998656	0.640547	0.899702	1.24127e-05	0.992006	7.3	17.68	8.22	9.05
Q9VFT4	AT27578p	28	324	14	690	cell organization and biogenesis;stress response;developmental processes;other biological processes	cytosol;other cell component	nucleic acid binding activity;other molecular function		rin	1.194	1.559	1.862	1.054	1.766	0.557047	0.988593	0.994562	0.992295	0.992006	22.6	19.05	34.95	26.55
P41126	60S ribosomal protein L13	44	567	14	218	protein metabolism;other metabolic processes	cytosol;translational apparatus	nucleic acid binding activity;other molecular function	Nonsense Mediated Decay (NMD) enhanced by the Exon Junction Complex (EJC); L13a-mediated translational silencing of Ceruloplasmin expression; Formation of a pool of free 40S subunits; Nonsense Mediated Decay (NMD) independent of the Exon Junction Complex (EJC); SRP-dependent cotranslational protein targeting to membrane; GTP hydrolysis and joining of the 60S ribosomal subunit	RpL13	1.054	1.996	2.104	0.945	2.226	0.998656	0.858299	0.994562	0.931101	0.968262	15.31	10.83	16.52	16.11
A0A0B4LG52	GEO08239p1	57	675	14	148	protein metabolism;other metabolic processes	translational apparatus;other cell component	other molecular function		RpS16	1.033	1.893	1.955	1.018	1.921	0.998656	0.888938	0.994562	0.99592	0.992006	11.74	7.62	11.02	9.24
Q9V3W7	Splicing factor, arginine/serine-rich 1	40	263	14	255	RNA metabolism OR transcription;other metabolic processes;transport;other biological processes	nucleus	nucleic acid binding activity	mRNA Splicing - Major Pathway; Transport of Mature mRNA derived from an Intron-Containing Transcript; RNA Polymerase II Transcription Termination; mRNA 3'-end processing; mRNA Splicing - Minor Pathway	SF2	1.149	1.214	1.394	0.877	1.59	0.938629	0.999685	0.996106	0.71451	0.992006	11.74	8.18	17.1	9.29
Q9VPB3	LD26447p	45	186	14	305	RNA metabolism OR transcription;other metabolic processes;stress response		other molecular function		tzn	1.371	1.376	1.886	0.976	1.933	0.258355	0.991669	0.994562	0.994447	0.992006	28.9	20.45	27.1	15.61
Q8IMT4	CHK domain-containing protein	39	250	14	428			other molecular function		CG13665	0.925	1.1	1.017	1.211	0.84	0.938629	0.99616	0.994562	0.471132	0.992006	26.75	16.55	18.5	5.13
P38979	40S ribosomal protein SA	56	402	14	270	cell organization and biogenesis;protein metabolism;other metabolic processes	cytosol;translational apparatus;nucleus	translation activity;other molecular function	Nonsense Mediated Decay (NMD) enhanced by the Exon Junction Complex (EJC); L13a-mediated translational silencing of Ceruloplasmin expression; Translation initiation complex formation; Formation of a pool of free 40S subunits; Formation of the ternary complex, and subsequently, the 43S complex; Ribosomal scanning and start codon recognition; Nonsense Mediated Decay (NMD) independent of the Exon Ju…	sta	0.98	1.969	1.93	1.028	1.877	0.998656	0.873359	0.994562	0.994447	0.992006	11.14	8.42	14.51	10.05
P22465	Annexin B10	58	304	14	321		other membranes;other cell component	other molecular function	Neutrophil degranulation; Platelet degranulation	AnxB10	1.038	0.915	0.949	0.904	1.05	0.998656	0.991669	0.994562	0.738832	0.993518	27.14	14.28	15.69	5.94
Q9VC48	Methionine aminopeptidase	44	199	14	374	protein metabolism;other metabolic processes	cytosol	other molecular function	Inactivation, recovery and regulation of the phototransduction cascade	MAP1A	1.008	1.666	1.679	1.049	1.601	0.998656	0.938316	0.994562	0.994447	0.992006	9.87	9.01	9.46	14.85
M9PCA7	Sodium chloride cotransporter 69, isoform C	17	155	14	1191	cell organization and biogenesis;transport;other biological processes	plasma membrane;other membranes	transporter activity		Ncc69	0.825	1.085	0.895	0.936	0.956	0.55999	0.997109	0.994562	0.936959	0.992006	12.59	18.38	16.33	17.41
P06742	Myosin light chain alkali	57	1171	14	155	other biological processes	cytoskeleton	enzyme regulator activity;cytoskeletal activity;other molecular function	Smooth Muscle Contraction; RHO GTPases activate PAKs	Mlc1	1.118	0.655	0.733	1.173	0.624	0.907556	0.888938	0.994562	0.500141	0.992006	13.93	4.02	8.58	15.4
Q7KB18	Epoxide hydrolase	40	250	14	463	other metabolic processes	other membranes;ER/Golgi	other molecular function	Phase I - Functionalization of compounds	Jheh2	1.066	1.168	1.245	1.077	1.155	0.998656	0.999685	0.997675	0.959992	0.999391	18.81	5.04	15.33	11.32
Q9VGS2	Translationally-controlled tumor protein homolog	79	793	14	172	cell cycle OR cell proliferation;cell organization and biogenesis;DNA metabolism;other metabolic processes;stress response;signal transduction;other biological processes	cytoskeleton;nucleus;other cell component	enzyme regulator activity;other molecular function		Tctp	1.045	1.582	1.653	1.047	1.578	0.998656	0.98327	0.994562	0.992295	0.992006	9.88	20.14	13.84	11.91
Q9VTZ4	Phosphoacetylglucosamine mutase	39	149	14	549	other metabolic processes;developmental processes;other biological processes		other molecular function	Synthesis of UDP-N-acetyl-glucosamine	nst	1.009	1.038	1.047	0.9	1.163	0.998656	0.991669	0.994562	0.806935	0.999391	9.69	12.68	9.08	12.14
Q95RA9	GILT-like protein 1	60	262	14	250	other biological processes	non-structural extracellular;plasma membrane;other membranes	other molecular function	MHC class II antigen presentation	GILT1	1.433	0.916	1.313	1.097	1.197	0.0579512	0.991669	0.996106	0.93159	0.993959	42.83	34.71	31.95	28.19
Q9W299	Sugar phosphate phosphatase	38	207	14	436	protein metabolism;other metabolic processes;other biological processes		other molecular function		Dmel\CG11474	0.994	0.848	0.843	0.93	0.907	0.998656	0.975168	0.994562	0.931101	0.992006	14.67	8.9	24.77	29.24
Q7JQH9	Carnitine O-palmitoyltransferase	26	209	14	780	other metabolic processes;stress response;other biological processes	other membranes;mitochondrion	other molecular function		whd	0.991	0.94	0.931	0.952	0.978	0.998656	0.991669	0.994562	0.961246	0.992006	15.03	4.28	6.87	11.07
Q9VMY9	Guanine deaminase	42	184	14	448	other metabolic processes	cytosol	other molecular function	Purine catabolism	DhpD	0.947	0.957	0.907	0.934	0.971	0.998656	0.991669	0.994562	0.933682	0.992006	16.2	20.12	12.02	9.61
X2JAU0	Integrin beta	25	191	14	846	cell adhesion;signal transduction	other membranes			mys	1.006	0.784	0.788	0.886	0.89	0.998656	0.936111	0.994562	0.738094	0.992006	10.71	17.37	13.1	17.91
X2J9F3	Nucleoporin 160kD, isoform B	16	105	14	1411	other metabolic processes;transport;other biological processes	nucleus			Nup160	1.417	1.221	1.73	0.955	1.811	0.331436	0.999685	0.994562	0.990833	0.992006	35.56	20.92	15.48	25.21
Q9VFX0	Aminopeptidase	22	141	14	994	protein metabolism;other metabolic processes;transport	other cell component	other molecular function	Neutrophil degranulation; Antigen processing: Ubiquitination & Proteasome degradation; Antigen Presentation: Folding, assembly and peptide loading of class I MHC	Dmel\CG8773	0.918	1.672	1.534	1.207	1.271	0.954286	0.938316	0.994562	0.753484	0.992006	30.08	10.06	20.78	14.49
X2JF59	Thioredoxin peroxidase 1, isoform C	65	1395	14	194	other biological processes		other molecular function		Prx2	1.25	1.232	1.54	1.091	1.412	0.331945	0.991669	0.994562	0.931101	0.992006	32.24	12.91	22.75	13.12
A0A0B4LEK8	Secretory 24AB, isoform C	15	141	14	1162	cell organization and biogenesis;transport	other membranes;ER/Golgi	other molecular function		Sec24AB	1.074	1.216	1.306	0.918	1.422	0.998656	0.991669	0.996106	0.933682	0.992006	7.03	5.6	16.57	11.13
Q03043	cGMP-dependent protein kinase, isozyme 2 forms cD4/T1/T3A/T3B	14	166	14	1088	cell organization and biogenesis;protein metabolism;other metabolic processes;developmental processes;signal transduction;other biological processes	plasma membrane;other membranes;cytosol	kinase activity;other molecular function	RAS processing; Rap1 signalling; Tetrahydrobiopterin (BH4) synthesis, recycling, salvage and regulation	for	1.063	0.651	0.692	0.937	0.738	0.998656	0.755482	0.964289	0.936959	0.992006	15.02	14.37	6.07	12.13
M9MRD0	Ubiquitin carboxyl-terminal hydrolase	79	369	14	227	protein metabolism;other metabolic processes		other molecular function		Uch	1.747	1.118	1.952	1.043	1.871	3.63527e-05	0.999685	0.994562	0.994447	0.992006	56.1	31.82	38.36	37.68
Q9Y136	Neprilysin-like 21	21	147	14	707	protein metabolism;other metabolic processes	plasma membrane;other membranes	other molecular function	Neutrophil degranulation; Physiological factors	Nepl21	1.042	0.904	0.943	0.927	1.016	0.998656	0.991669	0.994562	0.931101	0.992006	29.32	13.88	12.59	13.95
Q9Y162	Vesicle-fusing ATPase	33	243	14	442	cell organization and biogenesis;protein metabolism;other metabolic processes;transport;developmental processes;other biological processes	other membranes;other cytoplasmic organelle;other cell component	other molecular function	Sealing of the nuclear envelope (NE) by ESCRT-III	Vps4	0.989	1.297	1.282	0.915	1.402	0.998656	0.991669	0.996701	0.900363	0.992006	9.01	10.25	8.55	9.79
Q9V3D9	Signal recognition particle 54 kDa protein	34	118	14	508	transport	cytosol;translational apparatus	nucleic acid binding activity;other molecular function	SRP-dependent cotranslational protein targeting to membrane	Srp54k	1.07	1.668	1.785	1.084	1.647	0.998656	0.888938	0.994562	0.963723	0.992006	12.89	10.87	29.58	15.67
Q95U54	MMS19 nucleotide excision repair protein	19	110	14	959	cell cycle OR cell proliferation;cell organization and biogenesis;protein metabolism;DNA metabolism;other metabolic processes;stress response;other biological processes	cytoskeleton;nucleus;other cell component			Mms19	1.094	1.153	1.261	0.81	1.557	0.998656	0.999685	0.997675	0.558409	0.992006	25.56	24.53	31.42	31.81
Q7K486	Armadillo repeat-containing protein 6 homolog	42	135	14	464	other biological processes					1.286	1.283	1.65	1.04	1.586	0.576354	0.991669	0.994562	0.994447	0.992006	33.26	15.87	28.71	14.89
Q0E980	Uncharacterized protein, isoform C	39	206	14	618					Dmel\CG8547	1.199	0.62	0.743	0.945	0.787	0.882891	0.652323	0.994562	0.949351	0.992006	14.86	33.33	21.58	19.86
Q9VXI6	Cytochrome b-c1 complex subunit 7	69	646	14	111	other metabolic processes	other membranes;mitochondrion		Respiratory electron transport	UQCR-14	0.916	0.768	0.703	0.852	0.826	0.879309	0.973991	0.994562	0.337283	0.992006	12.7	15.41	13.31	20.86
Q7K0Y1	Ribosome biogenesis protein BOP1 homolog	18	164	14	784	RNA metabolism OR transcription;other metabolic processes;other biological processes	nucleus;other cell component	other molecular function	Major pathway of rRNA processing in the nucleolus and cytosol		0.582	1.745	1.016	0.886	1.147	0.00507685	0.888938	0.994562	0.845574	0.999838	48	36.95	9.87	27.92
P25007	Peptidyl-prolyl cis-trans isomerase	61	3011	14	227	protein metabolism;other metabolic processes;stress response;other biological processes	cytosol;mitochondrion;other cell component	other molecular function		Cyp1	1.018	1.407	1.432	1.019	1.405	0.999628	0.991669	0.994562	0.994447	0.992006	13.96	9.99	18.26	10.27
Q9W4M9	tRNA (cytosine(34)-C(5))-methyltransferase	27	142	14	746	RNA metabolism OR transcription;other metabolic processes;other biological processes	nucleus;other cell component	nucleic acid binding activity;other molecular function		Nsun2	0.877	2.492	2.186	1.247	1.752	0.852288	0.601668	0.964289	0.620286	0.992006	20.66	7.52	19.03	16.2
Q0E9A5	FI21269p1	28	100	14	853	other biological processes	other cell component			muskelin	2.527	1.132	2.861	0.956	2.992	7.09942e-06	0.999685	0.768232	0.994447	0.461524	71.88	55.13	46.71	50.46
Q9W1F7	IP15825p	47	305	14	366	cell organization and biogenesis	other membranes;mitochondrion			Stoml2	1.113	1.172	1.305	0.926	1.41	0.998656	0.999685	0.996106	0.931101	0.992006	2.04	12.74	15.74	7.08
Q95U34	GH11113p	32	323	14	490	other metabolic processes	non-structural extracellular;other membranes;cytosol;other cell component	kinase activity;other molecular function		Galk	0.822	1.031	0.848	1.058	0.802	0.311076	0.99401	0.994562	0.973354	0.992006	13.67	12.84	21.79	4.93
Q07327	Protein ROP	24	211	14	597	cell-cell signaling;cell organization and biogenesis;transport;other biological processes	plasma membrane;other membranes;cytosol;other cell component	other molecular function	Norepinephrine Neurotransmitter Release Cycle; Platelet degranulation ; Serotonin Neurotransmitter Release Cycle; Glutamate Neurotransmitter Release Cycle; Dopamine Neurotransmitter Release Cycle; Acetylcholine Neurotransmitter Release Cycle; GABA synthesis, release, reuptake and degradation; Other interleukin signaling; Disinhibition of SNARE formation	Rop	0.762	0.833	0.635	0.955	0.665	0.289892	0.962397	0.964289	0.963131	0.992006	6.61	31.7	11.5	11.02
Q8MSU3	Putative ferric-chelate reductase 1 homolog	33	225	14	647	transport;other biological processes	other membranes	transporter activity;other molecular function			0.847	1.05	0.89	0.939	0.948	0.683742	0.991669	0.994562	0.939467	0.992006	11.5	7.89	6.12	4.48
Q9VAX8	116 kDa U5 small nuclear ribonucleoprotein component	21	115	14	975	protein metabolism;RNA metabolism OR transcription;other metabolic processes;other biological processes	cytosol;nucleus;other cell component	nucleic acid binding activity;other molecular function	mRNA Splicing - Major Pathway; mRNA Splicing - Minor Pathway	Dmel\CG4849	1.237	1.441	1.782	1.102	1.618	0.72286	0.991669	0.994562	0.936976	0.992006	30.9	24.47	18.72	27.39
Q9VHA1	Spermidine synthase, isoform A	52	254	14	287	other metabolic processes		other molecular function	Metabolism of polyamines	SpdS	0.846	1.335	1.129	0.723	1.561	0.503641	0.991669	0.996106	0.0226039	0.992006	5.66	17.95	13.58	19.23
A0A0B4KHL2	Coatomer subunit gamma	24	165	14	897	transport	other membranes;ER/Golgi	other molecular function		gammaCOP	1.081	1.485	1.604	1.305	1.23	0.998656	0.982739	0.994562	0.257242	0.993518	22.5	9.06	29.48	15.18
P08736	Elongation factor 1-alpha 1	61	3467	14	463	protein metabolism;other metabolic processes	other cell component	nucleic acid binding activity;other molecular function	Neutrophil degranulation; Protein methylation; HSF1 activation; Eukaryotic Translation Elongation	eEF1alpha1	0.946	2.48	2.346	0.975	2.405	0.983502	0.601171	0.964289	0.988285	0.899961	18.18	24.18	33.26	26.81
Q9VHR5	Uncharacterized protein	26	117	14	642	RNA metabolism OR transcription;other metabolic processes		other molecular function		Veneno	1.176	1.717	2.019	0.943	2.141	0.954286	0.947619	0.994562	0.993831	0.992006	27.63	22.45	34.08	26.08
Q8MT06	Guanine nucleotide-binding protein-like 3 homolog	29	112	13	581	other biological processes	nucleus	other molecular function	Major pathway of rRNA processing in the nucleolus and cytosol	Ns1	0.594	2.159	1.283	0.966	1.328	0.00956874	0.652323	0.996921	0.994447	0.992006	55.96	43.82	59.83	39.33
Q9V9S8	Ferrochelatase, mitochondrial	51	205	13	384	other metabolic processes	other membranes;mitochondrion	other molecular function	Heme biosynthesis	FeCh	0.959	0.931	0.893	1.025	0.871	0.998656	0.991669	0.994562	0.994447	0.992006	14.03	5.46	6.46	7.07
Q7K485	Cathepsin D	51	569	13	392	protein metabolism;stress response;other biological processes	other cytoplasmic organelle	other molecular function	Neutrophil degranulation; MHC class II antigen presentation; Surfactant metabolism	cathD	1.03	1.419	1.462	1.139	1.283	0.998656	0.991669	0.994562	0.707852	0.992006	6.56	9.68	8.55	9.73
Q967S0	Amidophosphoribosyltransferase	30	279	13	547	other metabolic processes		other molecular function		Prat2	1.07	1.48	1.584	1.721	0.921	0.998656	0.991669	0.994562	6.50706e-06	0.992006	10.83	15.86	19.09	14.17
Q9VM12	MIP26555p1	49	414	13	294	other biological processes		other molecular function	Vitamin E	Dmel\CG5958	1.021	0.977	0.997	1.037	0.962	0.999628	0.991669	0.994562	0.994447	0.992006	10.11	12.26	19.79	6.77
Q86BP1	3-hydroxyisobutyryl-CoA hydrolase, mitochondrial	45	295	13	386	other metabolic processes;other biological processes	mitochondrion	other molecular function	Branched-chain amino acid catabolism	Hibch	1.058	1.152	1.22	1.043	1.169	0.998656	0.999685	0.998213	0.994447	0.999838	5	5.29	3.54	7.88
Q8IP62	Mitochondrial ribosomal protein S23	80	152	13	189	protein metabolism;other metabolic processes	mitochondrion;translational apparatus	other molecular function	Mitochondrial translation elongation; Mitochondrial translation termination	mRpS23	1.675	0.902	1.511	1.25	1.208	0.0206912	0.991669	0.994562	0.4502	0.993518	38.19	23.77	25.66	24.58
Q9VGK7	Putative elongator complex protein 1	14	93	13	1252	cell organization and biogenesis;RNA metabolism OR transcription;other metabolic processes	cytosol;nucleus;other cell component	nucleic acid binding activity;other molecular function		Elp1	1.022	1.486	1.518	0.973	1.561	0.999628	0.991669	0.994562	0.994447	0.992006	22.67	13.89	17.99	18.54
A0A0B4K7U5	Lingerer, isoform H	20	231	13	1330					lig	1.827	1.179	2.153	0.978	2.202	0.000182248	0.999685	0.987592	0.994447	0.992006	50.9	35.71	49.88	58.84
Q8IN49	MIP05539p	19	170	13	807					Dmel\CG31195	0.908	1.125	1.021	0.988	1.033	0.938629	0.999685	0.994562	0.994447	0.992006	9.88	17.8	5.91	3.44
Q9VWG1	LD37169p	64	368	13	183	stress response;other biological processes	cytoskeleton	other molecular function		dHspB8	1.315	0.734	0.965	1.233	0.783	0.154421	0.946966	0.994562	0.210537	0.992006	23.84	16.34	17.84	19.77
Q86BQ3	Uncharacterized protein, isoform A	43	174	13	325		other membranes;ER/Golgi	other molecular function		Dmel\CG13284	1.159	1.041	1.207	1.125	1.074	0.954451	0.991669	0.999991	0.88642	0.992006	19.52	22.59	11.89	19.6
Q24009	Protein bicaudal C	20	99	13	905	cell organization and biogenesis;other biological processes	other cell component	nucleic acid binding activity		BicC	1.416	2.325	3.294	0.95	3.467	0.302457	0.717959	0.492886	0.994447	0.253546	33.53	18.25	31.81	38.83
P91875	DNA-directed RNA polymerase I subunit RPA1	12	65	13	1642	RNA metabolism OR transcription;other metabolic processes	nucleus	nucleic acid binding activity;other molecular function	RNA Polymerase I Promoter Escape; RNA Polymerase I Transcription Initiation	RpI1	0.878	1.41	1.238	0.984	1.258	0.903653	0.991669	0.996921	0.994447	0.992762	26.46	24.94	20.94	9.47
X2JDA5	Glutamine synthetase	36	337	13	373	other metabolic processes		other molecular function		Gs2	1.011	0.874	0.883	1.054	0.838	0.999628	0.991669	0.994562	0.981479	0.992006	6.89	9.48	11.81	11.17
Q9V345	COP9 signalosome complex subunit 4	44	88	13	407	protein metabolism;other metabolic processes;developmental processes;other biological processes	nucleus;other cell component	nucleic acid binding activity	Neddylation; Cargo recognition for clathrin-mediated endocytosis; DNA Damage Recognition in GG-NER; Formation of TC-NER Pre-Incision Complex; RHOBTB1 GTPase cycle	CSN4	1.346	1.037	1.396	1.062	1.315	0.447129	0.991669	0.994562	0.994447	0.992006	39.74	29.83	28.96	27.14
Q9VH01	BIR repeat containing ubiquitin-conjugating enzyme, isoform A	4	41	13	4876	protein metabolism;other metabolic processes;stress response;other biological processes		other molecular function		Bruce	1.178	1.091	1.286	0.851	1.51	0.926852	0.999685	0.996106	0.718041	0.992006	18.83	15.1	17.88	18.16
Q9VKR4	Aminomethyltransferase	51	199	13	405	other metabolic processes	mitochondrion	other molecular function	Glycine degradation	Dmel\CG6415	1.071	1.64	1.757	1.245	1.411	0.998656	0.903432	0.994562	0.475133	0.992006	16.08	11.37	13.61	7.63
H5V8B8	MIP33436p1	25	298	13	650					Pp2A-29B	1.381	1.408	1.945	1.006	1.933	0.092053	0.991669	0.994562	0.994447	0.992006	34.75	23.31	28.22	22.79
Q9VKJ6	Cation-transporting ATPase	16	123	13	1225	transport;other biological processes	other membranes;ER/Golgi	transporter activity;other molecular function	Ion transport by P-type ATPases	Dmel\CG6230	1.028	1.295	1.332	1.041	1.279	0.999628	0.991669	0.996106	0.994447	0.992006	7.93	14.68	19.69	11.86
Q8INB6	Gilgamesh, isoform C	31	157	13	427	cell-cell signaling;protein metabolism;other metabolic processes;developmental processes;signal transduction;other biological processes	plasma membrane;other membranes;nucleus;other cell component	kinase activity;other molecular function		gish	0.983	1.046	1.028	0.966	1.064	0.998656	0.991669	0.994562	0.988285	0.993518	9.21	7.52	6.55	2.7
A0A0B4KEL0	Aldehyde dehydrogenase	30	243	13	498	other metabolic processes	other membranes	other molecular function		Aldh-III	1.041	1.289	1.342	0.923	1.454	0.998656	0.991669	0.994562	0.913054	0.992006	10.7	3.14	3.11	11.17
B7Z0E2	FI18812p1	16	88	13	1057	cell organization and biogenesis;other biological processes	cytosol;other cell component	nucleic acid binding activity		Unr	0.82	2.999	2.458	1.256	1.956	0.666663	0.341656	0.947565	0.762897	0.992006	35.87	30.99	50.28	47.95
P54351	Vesicle-fusing ATPase 2	36	319	13	752	cell-cell signaling;cell organization and biogenesis;transport;developmental processes;other biological processes	ER/Golgi;other cell component	other molecular function	COPI-dependent Golgi-to-ER retrograde traffic; COPII-mediated vesicle transport; Retrograde transport at the Trans-Golgi-Network; Intra-Golgi traffic; COPI-mediated anterograde transport; Trafficking of GluR2-containing AMPA receptors	Nsf2	1.025	1.421	1.457	1.024	1.423	0.999628	0.988593	0.994562	0.994941	0.992006	10.45	2.81	12.74	10.46
M9PFN1	RuvB-like helicase	35	137	13	481	cell organization and biogenesis;DNA metabolism;other metabolic processes;stress response	nucleus	other molecular function		rept	1.072	1.818	1.95	0.943	2.067	0.998656	0.888938	0.994562	0.939976	0.992006	14.34	13.75	18.89	18.49
A1Z7J7	Secretory 31, isoform A	15	181	13	1240	cell organization and biogenesis;transport	other membranes;ER/Golgi;other cell component	other molecular function		Sec31	1.105	1.297	1.433	0.88	1.629	0.998656	0.991669	0.994562	0.800567	0.992006	20.73	21.47	26.89	24.07
Q7KVL7	Vacuolar protein sorting-associated protein 35	19	160	13	803	transport;other biological processes	other membranes;cytosol;other cytoplasmic organelle;other cell component	other molecular function		Vps35	1.067	1.111	1.185	0.885	1.339	0.998656	0.999685	0.996921	0.793768	0.992006	12.82	5.22	10.82	8.49
P20007	Phosphoenolpyruvate carboxykinase [GTP]	31	145	13	647	other metabolic processes;stress response;other biological processes	cytosol;other cell component	other molecular function	Gluconeogenesis	Pepck1	1.645	0.813	1.337	1.114	1.2	0.0446303	0.976218	0.994562	0.933682	0.993518	27.11	15.13	14.61	19.33
Q9VQQ6	FI18122p1	42	221	13	458	transport	other membranes;cytosol;other cytoplasmic organelle	other molecular function	Golgi Associated Vesicle Biogenesis	Snx1	1.028	1.52	1.563	1.003	1.558	0.999628	0.988593	0.994562	0.994447	0.992006	7.77	13.49	21.95	8.93
A0A0B4LGM0	Prominin, isoform E	14	146	13	1173	cell organization and biogenesis;developmental processes	other membranes;other cell component			prom	1.086	0.54	0.586	0.935	0.627	0.998656	0.64966	0.955797	0.910312	0.992006	13.38	18.61	24.1	20
Q960T2	Synapse-associated protein of 47 kDa	25	243	13	551	cell-cell signaling;signal transduction;other biological processes	ER/Golgi;nucleus;other cell component			Sap47	0.997	1.065	1.062	1.332	0.797	0.998656	0.997109	0.996106	0.0220208	0.992006	29.62	24.4	36.72	25.33
Q9VZQ8	Glutathione peroxidase	80	459	13	169	stress response;other biological processes	ER/Golgi	other molecular function		Gtpx	0.975	0.898	0.876	0.941	0.931	0.998656	0.991669	0.994562	0.931101	0.992006	7.31	3.66	10.95	14.19
Q9VW26	Ornithine aminotransferase, mitochondrial	39	249	13	431	other metabolic processes	cytosol;mitochondrion;other cell component	other molecular function	Glutamate and glutamine metabolism	Oat	0.933	2.223	2.074	1.209	1.716	0.978165	0.604509	0.994562	0.588253	0.992006	15.24	12.75	73.67	15.86
Q7K3M5	DEAH-box helicase 15, isoform A	26	112	13	729	RNA metabolism OR transcription;other metabolic processes;stress response;other biological processes	nucleus	nucleic acid binding activity;other molecular function	mRNA Splicing - Major Pathway	Dhx15	0.841	1.137	0.956	0.721	1.326	0.679263	0.999685	0.994562	0.0482929	0.992006	26.3	29.67	34.02	43.81
Q9VY05	GH11762p	33	287	13	623	other metabolic processes;developmental processes		other molecular function		Dmel\CG9512	0.701	1.562	1.096	1.197	0.916	0.0555488	0.988593	0.994562	0.616401	0.992006	27.04	22.63	16.27	21.84
Q960D4	SD06560p	29	112	13	593		other cell component	other molecular function		EG:22E5.5	1.074	0.887	0.953	0.968	0.984	0.998656	0.991669	0.994562	0.993804	0.992006	9.53	16.94	18.16	17.13
Q9VRP4	Bifunctional phosphopantetheine adenylyltransferase - Dephospho-CoA kinase	33	214	13	518	other metabolic processes;transport;developmental processes;other biological processes	cytosol	kinase activity;other molecular function		Ppat-Dpck	0.894	0.973	0.87	0.971	0.897	0.87321	0.991669	0.994562	0.989454	0.992006	18.07	7.05	6.37	9.11
P55162	Membrane-associated protein Hem	13	106	13	1126	cell adhesion;cell organization and biogenesis;developmental processes;other biological processes	plasma membrane;other membranes;other cell component		Neutrophil degranulation; Regulation of actin dynamics for phagocytic cup formation; VEGFA-VEGFR2 Pathway; RHO GTPases Activate WASPs and WAVEs; RAC1 GTPase cycle; RAC3 GTPase cycle	Hem	0.948	1.237	1.173	1.137	1.032	0.998656	0.991669	0.996701	0.931101	0.992006	10.59	12.78	17.2	13.17
P19334	Transient receptor potential protein	15	90	13	1275	cell organization and biogenesis;stress response;transport;signal transduction;other biological processes	plasma membrane;other membranes;other cell component	transporter activity;other molecular function	Ion homeostasis; TRP channels; Antigen activates B Cell Receptor (BCR) leading to generation of second messengers	trp	0.995	0.726	0.723	0.719	1.006	0.998656	0.914861	0.994562	0.115915	0.992006	18.85	15.16	11.6	13.75
A1Z909	LD11307p	14	170	13	891	RNA metabolism OR transcription;other metabolic processes	nucleus	nucleic acid binding activity;other molecular function		Dmel\CG8545	0.822	1.539	1.265	0.921	1.374	0.551252	0.967113	0.996106	0.931101	0.992006	42.62	31.24	21.42	15.73
Q9V9W2	60S ribosomal protein L6	41	691	13	243	cell organization and biogenesis;protein metabolism;other metabolic processes	cytosol;translational apparatus	nucleic acid binding activity;other molecular function		RpL6	1.003	1.824	1.829	1.028	1.78	0.998656	0.914961	0.994562	0.994447	0.992006	12.29	3.83	16.34	8.73
Q8I725	Uncharacterized protein	44	163	13	347		cytosol	other molecular function	Glyoxylate metabolism and glycine degradation	Dmel\CG1236	1.218	1.311	1.597	1.066	1.497	0.805287	0.991669	0.994562	0.988285	0.992006	33.68	22.43	12.34	14.82
A0A0B4LFM0	Calbindin 53E, isoform B	50	170	13	310			other molecular function		Cbp53E	0.93	0.671	0.624	0.946	0.66	0.981583	0.813903	0.951763	0.957815	0.992006	14.84	11.62	11.82	8.06
Q9VIV8	Uncharacterized protein	28	107	13	454		other cell component			Dmel\CG13084	1.098	2.634	2.891	1.058	2.733	0.969826	0.477834	0.876317	0.989454	0.793764	28.37	20.13	22.61	22.96
Q9VRJ4	SD02021p	37	210	13	317		other cytoplasmic organelle	other molecular function	RA biosynthesis pathway; Peroxisomal protein import	Dhrs4	0.84	1.473	1.237	1.071	1.155	0.493459	0.991669	0.999991	0.963131	0.999391	13.03	9.89	15.71	11.52
Q8INM3	Protein slender lobes	24	201	13	1420	cell organization and biogenesis	nucleus			sle	1.293	1.303	1.686	0.896	1.881	0.618288	0.991669	0.994562	0.931101	0.992006	34.15	19.04	39.37	39.53
A0A6F7R657	Widerborst, isoform H	19	191	13	709	protein metabolism;other metabolic processes;signal transduction	cytosol;nucleus;other cell component	enzyme regulator activity	Negative regulation of MAPK pathway; Beta-catenin phosphorylation cascade; CTLA4 inhibitory signaling; RAF activation; PI5P, PP2A and IER3 Regulate PI3K/AKT Signaling	wdb	0.821	1.221	1.002	1.175	0.853	0.369911	0.995046	0.994562	0.507233	0.992006	7	12.68	10.19	24.83
Q9VLQ9	Sorting nexin	36	138	13	449	cell organization and biogenesis;transport	other membranes;cytosol;other cytoplasmic organelle	other molecular function		Snx6	0.954	1.688	1.61	1.026	1.569	0.998656	0.888938	0.994562	0.994447	0.992006	13.33	14.77	11.9	17.3
Q7KSM5	Activator of SUMO 1	45	186	13	337	protein metabolism;other metabolic processes;other biological processes	nucleus;other cell component	other molecular function		Aos1	1.015	0.618	0.627	0.952	0.659	0.999628	0.842296	0.994562	0.938046	0.992006	17.75	14.32	13.76	6.99
P41093	60S ribosomal protein L18a	60	703	13	177	protein metabolism;other metabolic processes	cytosol;translational apparatus	other molecular function	Nonsense Mediated Decay (NMD) enhanced by the Exon Junction Complex (EJC); L13a-mediated translational silencing of Ceruloplasmin expression; Formation of a pool of free 40S subunits; Nonsense Mediated Decay (NMD) independent of the Exon Junction Complex (EJC); SRP-dependent cotranslational protein targeting to membrane; GTP hydrolysis and joining of the 60S ribosomal subunit	RpL18A	0.937	1.973	1.849	0.947	1.953	0.954286	0.872487	0.994562	0.932299	0.992006	3.89	10.22	10.22	11.42
Q7JXZ2	Gamma-cystathionase	38	315	13	393	other metabolic processes	other cell component	other molecular function	Degradation of cysteine and homocysteine; Cysteine formation from homocysteine	Cth	1.037	1.171	1.214	0.995	1.22	0.998656	0.999685	0.9983	0.994447	0.993518	10.27	13.83	15.83	10.63
Q7K2E1	LD05247p	31	171	13	529	other metabolic processes		other molecular function	Arachidonic acid metabolism	Dmel\CG8839	0.926	1.266	1.172	1.099	1.066	0.954286	0.991669	0.997675	0.939467	0.992006	21.52	15.23	12.18	10.59
D1Z3A2	ATP synthase-coupling factor 6, mitochondrial	72	214	13	106	other metabolic processes;transport	other membranes;mitochondrion	transporter activity		ATPsynCF6	1.036	1.026	1.063	1.154	0.921	0.998656	0.991669	0.996106	0.64275	0.992006	23.8	30.94	37.03	21.88
Q9VBX3	Vig2, isoform B	30	221	13	443	cell organization and biogenesis	nucleus;other cell component	nucleic acid binding activity	Platelet degranulation	vig2	0.92	1.944	1.789	0.84	2.13	0.9158	0.877023	0.994562	0.453441	0.992006	16.69	13.81	34	22.01
P20240	Otefin	38	128	13	424	cell cycle OR cell proliferation;cell organization and biogenesis;RNA metabolism OR transcription;other biological processes	other membranes;cytoskeleton;nucleus;other cell component	other molecular function		Ote	1.242	1.705	2.118	1.037	2.043	0.689903	0.918158	0.994562	0.994447	0.992006	34.17	29.11	22.05	28.96
Q9VMI5	CG9135 protein	34	178	13	487	other biological processes	other membranes	other molecular function		Dmel\CG9135	2.015	0.84	1.693	0.852	1.986	1.8665e-06	0.973991	0.994562	0.53719	0.992006	54.6	38.6	32.52	18.47
Q9VG73	Interleukin enhancer-binding factor 2 homolog	47	133	13	396	RNA metabolism OR transcription;other metabolic processes;other biological processes	nucleus	nucleic acid binding activity	Neutrophil degranulation		1.419	1.5	2.127	1.03	2.066	0.3818	0.991669	0.994562	0.994447	0.992006	34.39	32.07	33.21	29.38
Q7KVB1	ATP binding cassette subfamily B member 7, isoform B	19	192	13	709	transport;other biological processes	other membranes;mitochondrion	transporter activity;other molecular function		ABCB7	0.969	1.089	1.055	1.373	0.768	0.998656	0.997109	0.996106	0.0843903	0.992006	7.99	11.03	13.75	16.58
Q9XYP7	Gamma-tubulin complex component 2 homolog	21	69	13	852	cell cycle OR cell proliferation;cell organization and biogenesis;other biological processes	cytoskeleton;other cell component	cytoskeletal activity		Grip84	2.409	1.722	4.15	0.883	4.697	0.000797198	0.976218	0.338822	0.963131	0.135941	68.07	54.79	48	49.37
A8DQW8	Closca	11	97	13	1836	cell organization and biogenesis;developmental processes;signal transduction	non-structural extracellular			clos	1.514	1.557	2.357	0.988	2.385	0.219391	0.988771	0.951763	0.994447	0.944817	38.96	23.55	40.98	35.49
Q9VAJ9	SD09259p	46	314	13	317	transport	other membranes;mitochondrion	transporter activity	Gluconeogenesis	Dmel\CG1907	0.972	1.181	1.148	0.999	1.149	0.998656	0.997109	0.9983	0.994447	0.998202	13	7.37	8.11	3.77
Q9W2D9	Eukaryotic translation initiation factor 3 subunit K	56	279	13	222	cell organization and biogenesis;protein metabolism;other metabolic processes;other biological processes	translational apparatus;other cell component	translation activity;nucleic acid binding activity	L13a-mediated translational silencing of Ceruloplasmin expression; Formation of a pool of free 40S subunits; Translation initiation complex formation; Formation of the ternary complex, and subsequently, the 43S complex; Ribosomal scanning and start codon recognition	eIF3k	1.122	1.74	1.951	1.008	1.936	0.984445	0.914961	0.994562	0.99878	0.992006	14.34	13.91	32.49	20.78
Q9VG69	LP03547p	44	239	13	378	stress response		other molecular function		Srlp	1.247	0.928	1.157	0.898	1.288	0.716517	0.991669	0.996701	0.826241	0.992006	18.19	18.76	25.81	11.43
Q9VS57	RE14391p	24	164	13	753	transport	other membranes;ER/Golgi;other cell component	transporter activity		Sec63	0.865	1.193	1.032	0.701	1.472	0.681369	0.999685	0.994562	0.00838979	0.992006	9.9	7.14	17.2	9.4
Q9VHA8	LD25575p	33	116	13	498	other biological processes	ER/Golgi	other molecular function	Neutrophil degranulation; Regulation of Insulin-like Growth Factor (IGF) transport and uptake by Insulin-like Growth Factor Binding Proteins (IGFBPs); Post-translational protein phosphorylation	P58IPK	0.843	1.952	1.646	0.98	1.679	0.70347	0.888938	0.994562	0.994447	0.992006	20.53	12.42	31.74	17.29
Q9I7J0	GH21596p	66	655	13	169	cell organization and biogenesis	cytoskeleton	cytoskeletal activity	Neutrophil degranulation; Platelet degranulation	Dmel\CG5023	0.879	0.824	0.724	0.972	0.745	0.661232	0.991669	0.994562	0.980943	0.992006	14.61	18.23	16.88	8.9
Q9VD14	GH07286p	35	163	13	564	RNA metabolism OR transcription;other metabolic processes;other biological processes	mitochondrion;other cell component	nucleic acid binding activity		Dmel\CG13850	0.899	1.264	1.136	1.205	0.942	0.888708	0.991669	0.997675	0.645704	0.992006	20.25	16.26	21.33	17.37
E1JHQ1	Glutamine synthetase	33	201	13	399	other metabolic processes		other molecular function		Gs1	1.096	1.012	1.109	1.192	0.93	0.983502	0.991669	0.996106	0.393761	0.992006	28.17	18.74	21.25	20.44
Q9VJ31	CG10623 protein	44	226	13	331	other metabolic processes		other molecular function		Dmel\CG10623	1.1	1.234	1.357	1.028	1.32	0.998656	0.995286	0.994562	0.994447	0.992006	5.64	9.63	3.83	6.91
Q94514	Cytochrome c oxidase subunit 5A, mitochondrial	58	1715	13	149	other metabolic processes;other biological processes	other membranes;mitochondrion	other molecular function	Cytoprotection by HMOX1; TP53 Regulates Metabolic Genes; Respiratory electron transport	COX5A	0.984	0.799	0.787	0.969	0.812	0.998656	0.988593	0.994562	0.969803	0.992006	6.62	14.86	10.99	10.17
P18053	Proteasome subunit alpha type-4	64	298	13	264	protein metabolism;other metabolic processes	cytosol;nucleus;other cell component		Antigen processing: Ubiquitination & Proteasome degradation; Neddylation; Regulation of RAS by GAPs; ABC-family proteins mediated transport; Degradation of beta-catenin by the destruction complex; Ub-specific processing proteases; Activation of NF-kappaB in B cells; Oxygen-dependent proline hydroxylation of Hypoxia-inducible Factor Alpha; Cross-presentation of soluble exogenous antigens (endosome…	Prosalpha3	1.358	1.158	1.573	1.023	1.538	0.143251	0.999685	0.994562	0.994447	0.992006	28.84	21.24	33.57	13.53
Q94901	RNA-binding protein lark	47	250	13	352	cell organization and biogenesis;RNA metabolism OR transcription;other metabolic processes;transport;developmental processes;other biological processes	cytosol;nucleus;other cell component	nucleic acid binding activity;other molecular function		lark	1.164	0.799	0.93	1.019	0.913	0.901857	0.938316	0.994562	0.994941	0.992006	9.83	10.73	16.52	13.54
Q9VC05	Oxysterol-binding protein	27	144	13	784	cell organization and biogenesis;transport;developmental processes	plasma membrane;other membranes;cytosol;ER/Golgi;other cell component	transporter activity;other molecular function	Sphingolipid de novo biosynthesis; Synthesis of bile acids and bile salts	Osbp	0.97	1.085	1.053	1.009	1.043	0.998656	0.99616	0.996106	0.996612	0.992006	13.4	11.92	6.15	9.02
Q7KR10	Probable cytochrome P450 12d1 distal, mitochondrial	29	101	13	521	other metabolic processes;other biological processes	other membranes;mitochondrion	other molecular function		Cyp12d1-d	0.885	2.544	2.253	0.92	2.449	0.844377	0.409165	0.955797	0.938317	0.728189	24.6	19.3	44.75	35.08
Q9VRL0	Cytochrome c1, isoform A	45	699	13	307	other metabolic processes;transport	other membranes;mitochondrion	transporter activity;other molecular function	Respiratory electron transport	Cyt-c1	1.044	0.79	0.825	1.008	0.818	0.998656	0.983081	0.994562	0.996508	0.992006	9.5	10.35	5.48	6.55
Q9VYS3	Regulator of nonsense transcripts 1 homolog	16	136	13	1180	cell organization and biogenesis;RNA metabolism OR transcription;other metabolic processes;stress response;other biological processes	other cell component	nucleic acid binding activity;other molecular function	Nonsense Mediated Decay (NMD) enhanced by the Exon Junction Complex (EJC); Nonsense Mediated Decay (NMD) independent of the Exon Junction Complex (EJC)	Upf1	0.979	2.156	2.111	0.948	2.227	0.998656	0.757601	0.994562	0.994447	0.992006	13.47	15.65	29.21	34.88
P48810	Heterogeneous nuclear ribonucleoprotein 87F	39	312	13	385	stress response;developmental processes;other biological processes	nucleus;other cell component	nucleic acid binding activity		Hrb87F	0.894	0.837	0.748	1.041	0.718	0.747905	0.991669	0.994562	0.994447	0.992006	14.26	30.74	24.47	24.23
Q9VDI1	LD46328p	28	233	13	494	cell cycle OR cell proliferation;cell organization and biogenesis;other biological processes	plasma membrane;other membranes;other cell component	other molecular function		Synd	0.906	1.079	0.978	1.033	0.947	0.897272	0.991669	0.994562	0.994447	0.992006	20.91	23.64	21.86	25.65
P41374	Eukaryotic translation initiation factor 2 subunit 1	48	295	13	341	protein metabolism;other metabolic processes	cytosol;translational apparatus;other cell component	translation activity;nucleic acid binding activity	ABC-family proteins mediated transport; Recycling of eIF2:GDP; L13a-mediated translational silencing of Ceruloplasmin expression; Translation initiation complex formation; Formation of the ternary complex, and subsequently, the 43S complex; Ribosomal scanning and start codon recognition; PERK regulates gene expression	eIF2alpha	0.97	1.124	1.09	0.874	1.248	0.998656	0.999685	0.996921	0.498974	0.992006	6.9	13.98	6.68	13.98
A1Z7F2	Maltase A7, isoform A	36	166	13	599	other metabolic processes		other molecular function		Mal-A7	0.775	1.809	1.403	1.591	0.882	0.345436	0.830839	0.994562	0.00159175	0.992006	39.15	31.41	40.85	29.12
X2J8C3	Angiotensin-converting enzyme	23	130	13	615	protein metabolism	other membranes	other molecular function		Ance	1.125	0.748	0.841	0.924	0.91	0.998656	0.903432	0.994562	0.931101	0.992006	20.2	15.94	12.63	9.54
Q9W459	Fatty acyl-CoA reductase	35	189	13	494	other metabolic processes	other cytoplasmic organelle;other cell component	other molecular function		Dmel\CG4020	1.306	0.954	1.245	0.917	1.358	0.509263	0.991669	0.997675	0.912829	0.992006	20.19	12.2	15.25	11.01
Q9U9Q4	Eukaryotic translation initiation factor 3 subunit H	45	246	13	338	cell organization and biogenesis;protein metabolism;other metabolic processes;other biological processes	cytosol;translational apparatus;other cell component	nucleic acid binding activity;other molecular function	L13a-mediated translational silencing of Ceruloplasmin expression; Formation of a pool of free 40S subunits; Translation initiation complex formation; Formation of the ternary complex, and subsequently, the 43S complex; Ribosomal scanning and start codon recognition	eIF3h	1.18	1.6	1.889	1.006	1.877	0.888708	0.965462	0.994562	0.99878	0.992006	18.46	21	22.77	22.72
Q9VAV2	FI21480p1	26	138	13	696	protein metabolism;other metabolic processes	mitochondrion;other cell component	nucleic acid binding activity;other molecular function		mIF2	1.018	0.978	0.996	1.115	0.893	0.999039	0.991669	0.994562	0.931101	0.992006	9.31	9.77	8.65	9.92
Q8SXQ1	Aldehyde dehydrogenase 7 family member A1	41	239	13	540			other molecular function	Choline catabolism; Lysine catabolism	Aldh7A1	0.87	1.961	1.706	1.171	1.457	0.644607	0.872021	0.994562	0.654784	0.992006	24.59	16.01	11.54	12.3
Q7KTW9	Asparagine synthetase [glutamine-hydrolyzing]	23	105	13	558	other metabolic processes	cytosol	other molecular function		AsnS	1.082	0.692	0.749	0.94	0.796	0.998656	0.917785	0.994562	0.931101	0.992006	21.91	9.54	7.39	7.35
Q9W3K9	FI02989p	40	392	13	320		other membranes;ER/Golgi;other cell component	other molecular function	RA biosynthesis pathway; The canonical retinoid cycle in rods (twilight vision); Lipid particle organization; The retinoid cycle in cones (daylight vision); Estrogen biosynthesis	Ldsdh1	1.003	1.018	1.021	0.894	1.143	0.998656	0.991669	0.996106	0.670006	0.999203	17.6	8.83	7	6.74
A1YK02	Nuclear pore complex protein Nup75	25	76	13	668	other metabolic processes;transport;other biological processes	other membranes;nucleus	other molecular function	Transport of the SLBP independent Mature mRNA; Transport of the SLBP Dependant Mature mRNA; Transport of Mature mRNA Derived from an Intronless Transcript; Transport of Mature mRNA derived from an Intron-Containing Transcript; Nuclear Pore Complex (NPC) Disassembly; Regulation of HSF1-mediated heat shock response; SUMOylation of SUMOylation proteins; SUMOylation of chromatin organization proteins…	Nup75	1.033	1.782	1.841	0.954	1.929	0.999628	0.888938	0.994562	0.963131	0.992006	14.57	16.94	22.95	19.59
A0A0B4LFT2	Cytochrome P450-4e2, isoform B	33	175	13	526		other membranes	other molecular function		Cyp4e2	1	1.538	1.538	0.993	1.55	0.998656	0.969321	0.994562	0.994447	0.992006	13.53	9.09	32.97	9.66
H8F4T3	MIP34848p1	58	366	13	306	other metabolic processes;stress response;developmental processes	cytosol	other molecular function		smp-30	0.871	2.022	1.762	1.229	1.433	0.616725	0.842296	0.994562	0.223532	0.992006	23.89	18.13	5.65	6.62
Q9I7K6	Protein NASP homolog	38	173	13	492	cell organization and biogenesis	nucleus	other molecular function			2.657	1.105	2.937	0.806	3.644	7.46734e-10	0.999685	0.735135	0.326413	0.34572	69.23	46.13	59.63	48.08
Q9VD29	RE74312p	75	312	13	193	cell organization and biogenesis;transport;developmental processes;other biological processes	other membranes;ER/Golgi	other molecular function	COPII-mediated vesicle transport; Cargo concentration in the ER; Antigen Presentation: Folding, assembly and peptide loading of class I MHC	Sar1	1.023	1.058	1.082	1.029	1.052	0.999628	0.99616	0.996106	0.994447	0.993518	11.24	17.07	10.25	9.56
Q7JV09	GH28348p	16	100	13	1054	other biological processes	plasma membrane;other membranes;cytosol;ER/Golgi			jp	0.937	0.862	0.808	1.022	0.79	0.998656	0.991669	0.994562	0.994447	0.992006	10.08	24.18	15.34	7.2
Q9V9R2	Cullin 2, isoform A	21	91	13	753	protein metabolism;other metabolic processes;other biological processes	other cell component	other molecular function	Antigen processing: Ubiquitination & Proteasome degradation; Neddylation; Oxygen-dependent proline hydroxylation of Hypoxia-inducible Factor Alpha	Cul2	1.383	0.954	1.319	0.827	1.595	0.496561	0.991669	0.996106	0.698825	0.992006	40.21	27.19	32.37	17.98
Q9W3Z3	Serine--pyruvate aminotransferase	38	210	13	394	other metabolic processes	other cytoplasmic organelle	other molecular function	Glyoxylate metabolism and glycine degradation; Peroxisomal protein import	Agxt	1.012	0.846	0.856	1.131	0.757	0.999628	0.991669	0.994562	0.753484	0.992006	19.3	10.17	3.74	4.7
Q9U9Q1	Replication factor C 38kD subunit, isoform A	42	122	13	356	cell cycle OR cell proliferation;cell organization and biogenesis;DNA metabolism;other metabolic processes;stress response	nucleus;other cell component	nucleic acid binding activity;other molecular function	Dual incision in TC-NER; Gap-filling DNA repair synthesis and ligation in TC-NER; Activation of ATR in response to replication stress; Dual Incision in GG-NER; Translesion synthesis by REV1; Recognition of DNA damage by PCNA-containing replication complex; Translesion Synthesis by POLH; Translesion synthesis by POLK; Translesion synthesis by POLI; PCNA-Dependent Long Patch Base Excision Repair; T…	RfC38	1.312	2.051	2.691	1.266	2.126	0.498021	0.737892	0.735135	0.510934	0.90468	31.78	23.52	38.13	21.81
Q9VI25	Neurochondrin homolog	24	173	13	723	cell organization and biogenesis;developmental processes;other biological processes	other cell component			Neurochondrin	1.048	0.926	0.97	0.993	0.978	0.998656	0.991669	0.994562	0.994447	0.992006	9.57	20.42	8.02	3.95
Q9VDL2	LD40493p	53	196	13	257	stress response;other biological processes	mitochondrion;nucleus	nucleic acid binding activity		TFAM	0.926	1.522	1.409	0.979	1.439	0.931204	0.988593	0.994562	0.994447	0.992006	16.6	12.46	8.83	12.58
Q9Y0Y2	Adenylosuccinate synthetase	30	262	13	447	other metabolic processes	other cell component	other molecular function	Purine ribonucleoside monophosphate biosynthesis	AdSS	0.906	1.058	0.958	1.12	0.856	0.839692	0.996958	0.994562	0.807896	0.992006	13.03	10.48	11.36	13.04
Q9VWG3	40S ribosomal protein S10b	71	870	13	160	protein metabolism;other metabolic processes	cytosol;translational apparatus	nucleic acid binding activity	Nonsense Mediated Decay (NMD) enhanced by the Exon Junction Complex (EJC); L13a-mediated translational silencing of Ceruloplasmin expression; Translation initiation complex formation; Formation of a pool of free 40S subunits; Formation of the ternary complex, and subsequently, the 43S complex; Ribosomal scanning and start codon recognition; Nonsense Mediated Decay (NMD) independent of the Exon Ju…	RpS10b	0.97	2.265	2.196	1.082	2.03	0.998656	0.72284	0.994562	0.933682	0.992006	7.73	12.42	18.42	12.93
Q7JWX3	GH10112p	39	132	13	476	other biological processes	non-structural extracellular	enzyme regulator activity	Neutrophil degranulation; Platelet degranulation ; COPII-mediated vesicle transport; Cargo concentration in the ER; Regulation of Insulin-like Growth Factor (IGF) transport and uptake by Insulin-like Growth Factor Binding Proteins (IGFBPs); Post-translational protein phosphorylation; Intrinsic Pathway of Fibrin Clot Formation; Glucocorticoid biosynthesis; Prednisone ADME	nec	1.172	0.595	0.697	0.97	0.719	0.960394	0.717959	0.994562	0.993831	0.992006	24.38	20.09	11.68	5.22
O76904	EG:8D8.1 protein	8	59	13	2118	cell organization and biogenesis;developmental processes;signal transduction;other biological processes	extracellular matrix;plasma membrane;other membranes;other cell component	other molecular function		fs(1)N	1.239	2.076	2.572	1.25	2.058	0.804416	0.842296	0.878852	0.677002	0.992006	38.22	26.2	38.45	22.54
Q7K1Q6	Jabba, isoform B	38	280	13	320		other cell component			Jabba	1.357	1.545	2.096	1.053	1.992	0.125968	0.988593	0.994562	0.992936	0.992006	42.6	26.44	29.16	27.05
A0A0B4LFD9	40S ribosomal protein S23	55	615	13	143	protein metabolism;other metabolic processes	translational apparatus	other molecular function		RpS23	0.955	1.963	1.875	1.02	1.839	0.998656	0.8761	0.994562	0.994447	0.992006	16.08	15.25	12.21	6.22
M9PB84	40S ribosomal protein S2	56	784	13	267	protein metabolism;other metabolic processes	translational apparatus	nucleic acid binding activity;other molecular function		RpS2	0.943	1.651	1.556	1.03	1.51	0.979444	0.969413	0.994562	0.994447	0.992006	13.95	10.2	20.66	7.82
Q7K3E2	LD34147p	26	103	13	554					Dmel\CG5080	1.109	0.741	0.822	1.031	0.797	0.998656	0.888938	0.994562	0.994447	0.992006	13.5	10.18	9.23	6.52
Q95TK5	LD44914p	38	185	13	448	other metabolic processes	mitochondrion	other molecular function	Mitochondrial Fatty Acid Beta-Oxidation	Dmel\CG1635	1.03	0.846	0.871	0.923	0.944	0.999628	0.973991	0.994562	0.927844	0.992006	12.6	17.51	6	11.77
Q8I8U7	Transcription-associated protein 1	4	38	13	3790	cell organization and biogenesis;DNA metabolism;other metabolic processes;stress response;developmental processes;other biological processes	nucleus;other cell component		Ub-specific processing proteases; Formation of the beta-catenin:TCF transactivating complex	Nipped-A	1.538	1.108	1.704	0.919	1.854	0.243393	0.999685	0.994562	0.955309	0.992006	22.59	9.15	10.4	18.32
Q9VUJ1	Proteasome subunit beta	56	179	13	272	protein metabolism;other metabolic processes	cytosol;nucleus;other cell component	other molecular function	Antigen processing: Ubiquitination & Proteasome degradation; Neddylation; UCH proteinases; Ub-specific processing proteases; Neutrophil degranulation; Regulation of RAS by GAPs; ABC-family proteins mediated transport; Degradation of beta-catenin by the destruction complex; Activation of NF-kappaB in B cells; Oxygen-dependent proline hydroxylation of Hypoxia-inducible Factor Alpha; Cross-presentat…	Prosbeta2	0.964	1.312	1.265	1.111	1.138	0.998656	0.991669	0.996701	0.931101	0.996032	16.94	14.21	9.56	18.52
X2JAI2	Arp2/3 complex 34 kDa subunit	45	197	13	301	cell organization and biogenesis	cytoskeleton;other cell component	cytoskeletal activity		Arpc2	1.476	0.912	1.346	1.318	1.022	0.162851	0.991669	0.994562	0.140787	0.992006	26.39	23.81	21.21	25.23
Q9VPF3	4-hydroxyphenylpyruvate dioxygenase	47	204	13	380	other metabolic processes	other membranes;ER/Golgi	other molecular function	Tyrosine catabolism	Hpd	0.849	0.896	0.761	0.893	0.852	0.638455	0.988593	0.994562	0.800567	0.992006	13.13	24.77	17.64	25.94
P07182	Chorion protein S36	36	419	13	284	cell organization and biogenesis	non-structural extracellular;other cell component	other molecular function		Cp36	1.404	3.015	4.232	1.293	3.274	0.0371324	0.318809	0.358505	0.0590915	0.455449	14.35	25	42.14	43.1
Q7KUD4	Calcium-independent phospholipase A2 VIA, isoform B	22	113	13	887	other metabolic processes;other biological processes	mitochondrion;other cell component	other molecular function	COPI-independent Golgi-to-ER retrograde traffic; Role of phospholipids in phagocytosis; Acyl chain remodelling of PC; Acyl chain remodelling of PE	iPLA2-VIA	1.104	0.783	0.864	0.897	0.964	0.998656	0.928382	0.994562	0.816432	0.992006	13.56	18.59	11.88	13.89
Q9VZ55	GH07148p	14	69	13	1288			nucleic acid binding activity;other molecular function		Dmel\CG1582	1.176	1.841	2.164	1.222	1.771	0.983502	0.936111	0.994562	0.904474	0.992006	26.41	18.72	48.23	33
B7YZP9	Muscle LIM protein 60A	52	309	13	486			other molecular function		Mlp60A	0.955	0.752	0.718	1.053	0.682	0.998656	0.888938	0.994562	0.993831	0.992006	14.61	11.18	9.63	4.06
Q9V466	Nuclear pore complex protein Nup107	22	112	13	845	cell cycle OR cell proliferation;cell organization and biogenesis;DNA metabolism;other metabolic processes;stress response;transport;developmental processes;other biological processes	other membranes;cytoskeleton;nucleus;other cell component	other molecular function	Regulation of HSF1-mediated heat shock response; Transport of the SLBP independent Mature mRNA; Transport of the SLBP Dependant Mature mRNA; Transport of Mature mRNA Derived from an Intronless Transcript; Transport of Mature mRNA derived from an Intron-Containing Transcript; Nuclear Pore Complex (NPC) Disassembly; SUMOylation of SUMOylation proteins; SUMOylation of chromatin organization proteins…	Nup107	1.49	1.077	1.605	0.915	1.755	0.199738	0.997109	0.994562	0.93159	0.992006	51.15	27.56	32.03	34.68
A1ZB68	FI01423p	64	276	13	220	other metabolic processes	other cell component	other molecular function		GstE3	0.725	1.82	1.319	1.163	1.134	0.0246377	0.914961	0.996106	0.572242	0.999391	30.94	20.14	9.95	4.14
Q9VB46	Adipocyte plasma membrane-associated protein	30	360	13	579	other metabolic processes	plasma membrane;other membranes;other cell component	other molecular function		Hmu	0.907	1.6	1.451	1.03	1.409	0.832023	0.980994	0.994562	0.994447	0.992006	9.71	6.61	8.73	9.5
P46824	Kinesin light chain	31	123	13	508	cell organization and biogenesis;other biological processes	cytoskeleton;other cell component	cytoskeletal activity	COPI-dependent Golgi-to-ER retrograde traffic; Kinesins	Klc	0.859	1.647	1.414	1.078	1.312	0.73013	0.938316	0.994562	0.963131	0.992006	15.12	21.25	15.4	14.96
P84040	Histone H4	61	1728	13	103	cell organization and biogenesis	nucleus;other cell component	nucleic acid binding activity;other molecular function		His4	0.783	1.216	0.952	0.906	1.051	0.153792	0.992888	0.994562	0.75033	0.993518	20.02	22.37	14.5	7.79
Q9VKX2	Malate dehydrogenase	53	898	13	337	other metabolic processes	cytosol;other cytoplasmic organelle	other molecular function	Gluconeogenesis	Mdh1	1.017	1.401	1.424	1.153	1.236	0.999628	0.991669	0.994562	0.632247	0.992006	6.54	11.79	10.79	9.94
Q9W1X5	GH04942p	16	103	13	1335		other membranes			nahoda	1.174	0.678	0.797	1.215	0.656	0.983502	0.888938	0.994562	0.704301	0.992006	11.1	13.36	13.74	9.25
P46415	Alcohol dehydrogenase class-3	47	248	13	379	other metabolic processes;other biological processes	cytosol	other molecular function	RA biosynthesis pathway; Ethanol oxidation; Abacavir metabolism	Fdh	0.981	1.729	1.695	1.126	1.505	0.998656	0.945683	0.994562	0.784955	0.992006	10.68	15.42	22.05	16.48
Q9W4W8	Paraplegin, isoform A	23	123	13	819	protein metabolism;other metabolic processes	other membranes;mitochondrion	other molecular function	Processing of SMDT1	Spg7	1.061	1.013	1.075	1.034	1.04	0.998656	0.991669	0.994562	0.994447	0.992006	6.81	9.1	17.34	7.26
Q9VH09	Glycine cleavage system P protein	22	139	13	985	other metabolic processes	mitochondrion;other cell component	other molecular function	Glycine degradation	Dmel\CG3999	1.169	1.997	2.334	1.411	1.653	0.928279	0.782552	0.878852	0.152312	0.992006	14.71	10.73	21.13	23.14
Q0KI00	Aminopeptidase	24	142	13	932	protein metabolism;other metabolic processes	other cell component	other molecular function	Neutrophil degranulation; Antigen Presentation: Folding, assembly and peptide loading of class I MHC; Antigen processing: Ubiquitination & Proteasome degradation	SP1029	1.002	1.233	1.235	1.065	1.16	0.998656	0.991669	0.996701	0.988285	0.999838	24.22	5.3	11.52	16.48
Q9VKW1	LD41958p	50	135	13	408		other cytoplasmic organelle	other molecular function		Wdfy2	1.202	1.287	1.547	1.109	1.394	0.897272	0.991669	0.994562	0.939976	0.992006	19.6	20.77	19.75	7.09
Q9VN58	E3 ubiquitin-protein ligase TRIP12	5	50	12	3140	protein metabolism;DNA metabolism;other metabolic processes;stress response;other biological processes	nucleus	other molecular function	Antigen processing: Ubiquitination & Proteasome degradation	ctrip	1.456	1.403	2.042	1.339	1.525	0.181759	0.991669	0.964289	0.282341	0.992006	42.26	23.77	31.87	27.99
Q8SYL3	Eukaryotic initiation factor 4B	35	218	12	390	protein metabolism;other metabolic processes	cytosol	nucleic acid binding activity		eIF4B	1.183	1.519	1.797	1.048	1.714	0.802297	0.991669	0.994562	0.994447	0.992006	12.55	13.89	23.69	23.96
Q8I0S9	Methylcrotonoyl-CoA carboxylase 1, isoform B	28	102	12	634		mitochondrion	other molecular function		Mccc1	1.16	1.211	1.405	0.993	1.414	0.948212	0.991669	0.994562	0.994447	0.992006	7.29	10.56	17.59	6.46
A1Z8Z9	Uncharacterized protein	32	266	12	535	other metabolic processes		other molecular function		mdcds_23070	0.658	1.046	0.689	1.086	0.634	0.00835452	0.993922	0.994562	0.931101	0.992006	37.45	28.5	10.15	6.07
Q8IPX7	Exosome complex component RRP40	66	123	12	232	RNA metabolism OR transcription;other metabolic processes;developmental processes;other biological processes	nucleus;other cytoplasmic organelle;other cell component	nucleic acid binding activity	Major pathway of rRNA processing in the nucleolus and cytosol; Butyrate Response Factor 1 (BRF1) binds and destabilizes mRNA; Tristetraprolin (TTP, ZFP36) binds and destabilizes mRNA; mRNA decay by 3' to 5' exoribonuclease	Rrp40	1.099	1.333	1.465	0.947	1.547	0.998656	0.991669	0.994562	0.963131	0.992006	13.44	11.48	19.73	9.9
Q9VGQ1	Dihydrolipoyllysine-residue succinyltransferase component of 2-oxoglutarate dehydrogenase complex, mitochondrial	31	1107	12	468	other metabolic processes	mitochondrion;other cell component	other molecular function	Glyoxylate metabolism and glycine degradation; Citric acid cycle (TCA cycle); Lysine catabolism	alpha-KGDHC	1.071	0.687	0.736	1.047	0.703	0.998656	0.914961	0.994562	0.992936	0.992006	13.76	12	7.68	11.69
Q9VG79	Dipeptidase C, isoform A	28	134	12	491	protein metabolism		other molecular function		Dip-C	0.975	1.235	1.204	0.952	1.265	0.998656	0.991669	0.9983	0.976694	0.992006	38.66	19.17	14.7	16.3
Q5BIA9	RE10908p	20	90	12	808	other metabolic processes				Dmel\CG8613	1.194	0.782	0.934	0.827	1.13	0.950637	0.95336	0.994562	0.588253	0.9991	20.33	18.15	20.93	24.59
Q9VYA7	RRP12-like protein	12	76	12	1384		other membranes;nucleus				1.031	1.62	1.671	1.221	1.369	0.999628	0.982739	0.994562	0.735191	0.992006	33.64	25.25	18.36	33.1
P42271	Tubulin gamma-2 chain	37	127	12	457	cell cycle OR cell proliferation;cell organization and biogenesis;transport;developmental processes;other biological processes	cytoskeleton;nucleus;other cell component	cytoskeletal activity;other molecular function		gammaTub37C	1.088	1.469	1.598	1.158	1.381	0.998656	0.991669	0.994562	0.743577	0.992006	10.04	10.98	16.66	13.5
Q9VEY5	MICOS complex subunit	65	382	12	226	cell organization and biogenesis	other membranes;mitochondrion		Platelet degranulation	Mic26-27	0.918	0.964	0.885	0.98	0.902	0.89459	0.991669	0.994562	0.993831	0.992006	15.43	14.63	16.35	8.89
Q9VAY9	GH07821p	42	81	12	393	protein metabolism;other metabolic processes	mitochondrion;translational apparatus	other molecular function	Mitochondrial translation elongation; Mitochondrial translation termination	mRpS22	2.083	0.651	1.357	0.723	1.876	0.00227676	0.844219	0.996106	0.204559	0.992006	34.74	27.91	32.65	31.09
M9PJN5	Histone deacetylase 6, isoform G	15	144	12	1179	cell-cell signaling;cell organization and biogenesis;protein metabolism;other metabolic processes;transport;other biological processes	nucleus;other cell component	other molecular function	Aggrephagy; Notch-HLH transcription pathway; HSF1 activation	HDAC6	0.934	1.308	1.221	0.999	1.222	0.984445	0.991669	0.996701	0.994447	0.992006	10.52	9.37	19.58	10.49
Q9VZ58	Purple acid phosphatase	31	149	12	450			other molecular function		Dmel\CG1637	1.185	1.489	1.764	1.074	1.642	0.895827	0.988593	0.994562	0.979633	0.992006	12.36	3.7	7.8	10.69
Q9W028	IP19120p	45	153	12	382		non-structural extracellular			yellow-g2	1.096	3.068	3.362	1.121	3	0.998656	0.0863663	0.39191	0.931101	0.413304	8.49	19.74	27.83	40.68
P36951	Putative hydroxypyruvate isomerase	59	259	12	264	other metabolic processes		other molecular function		Gip	1	1.675	1.675	1.212	1.382	0.998656	0.967501	0.994562	0.471132	0.992006	19.19	11.98	14.91	10.01
A0A0B4JDA0	Moira, isoform B	15	127	12	1145	cell organization and biogenesis;developmental processes;other biological processes	nucleus;other cell component	other molecular function		mor	1.27	1.098	1.395	1.035	1.348	0.740741	0.997109	0.994562	0.994447	0.992006	27.61	16.54	28.96	18.05
P07909	Heterogeneous nuclear ribonucleoprotein A1	35	304	12	365	developmental processes;other biological processes	nucleus;other cell component	nucleic acid binding activity		Hrb98DE	1.012	1.713	1.734	1.02	1.701	0.998656	0.888938	0.994562	0.99592	0.992006	7.45	6.64	16.14	13.58
Q9VAD0	Acid phosphatase 1, isoform A	35	174	12	438	other metabolic processes	non-structural extracellular;other membranes;nucleus	other molecular function		Acph-1	1.036	1.616	1.674	0.935	1.79	0.999628	0.936111	0.994562	0.956506	0.992006	21.25	15.81	22.26	11.8
P06754	Tropomyosin-1, isoforms 9A/A/B	78	3835	12	339	cell organization and biogenesis;stress response;developmental processes;other biological processes	cytoskeleton	cytoskeletal activity;other molecular function		Tm1	0.987	0.86	0.849	1.232	0.689	0.998656	0.991669	0.994562	0.211807	0.992006	25.53	18.31	21.8	17.29
Q8IMI0	LD38861p	45	190	12	387	other metabolic processes	other cell component	other molecular function		Dmel\CG2246	1.011	1.048	1.06	0.995	1.065	0.999628	0.99616	0.996106	0.994447	0.993959	31.76	26.43	35.08	36.87
P40301	Proteasome subunit alpha type-2	51	199	12	234	protein metabolism;other metabolic processes	cytosol;nucleus;other cell component		Ub-specific processing proteases; Neutrophil degranulation; Antigen processing: Ubiquitination & Proteasome degradation; Neddylation; Regulation of RAS by GAPs; ABC-family proteins mediated transport; Degradation of beta-catenin by the destruction complex; Activation of NF-kappaB in B cells; Oxygen-dependent proline hydroxylation of Hypoxia-inducible Factor Alpha; Cross-presentation of soluble ex…	Prosalpha2	1.067	1.49	1.59	0.933	1.704	0.998656	0.991669	0.994562	0.931101	0.992006	18.74	14.63	25.7	19.98
Q961D3	LD17001p	12	61	12	1374	transport	other membranes	transporter activity;other molecular function	Cargo recognition for clathrin-mediated endocytosis; ABC-family proteins mediated transport; Platelet degranulation ; Paracetamol ADME; Aggrephagy; Azathioprine ADME	rdog	1.192	1.235	1.472	0.735	2.002	0.960394	0.993976	0.994562	0.395158	0.992006	12.05	14.86	12.5	32.93
Q9VFW8	Aminopeptidase	21	81	12	885	protein metabolism;other metabolic processes	other cell component	other molecular function		Dmel\CG8774	1.54	0.907	1.397	1.074	1.301	0.199443	0.991669	0.994562	0.979356	0.992006	36.32	31.98	27.27	40.37
A4V3W1	Shaggy, isoform J	24	163	12	575	protein metabolism;other metabolic processes		kinase activity;other molecular function		sgg	1	1.057	1.057	0.942	1.123	0.998656	0.991669	0.994562	0.939976	0.994669	8.74	10.53	9.94	13.22
Q9VZF6	GH04863p	37	154	12	457	other metabolic processes	mitochondrion	other molecular function	Sulfide oxidation to sulfate	Dmel\CG14997	0.929	0.834	0.775	0.998	0.776	0.978165	0.965462	0.994562	0.994447	0.992006	17.42	7.68	9.1	7.23
Q9V3A8	Ergic53, isoform A	36	164	12	512	transport	other membranes;ER/Golgi;other cell component	other molecular function	COPII-mediated vesicle transport; Cargo concentration in the ER; RHOD GTPase cycle	ergic53	1.147	1.27	1.456	1.03	1.414	0.955427	0.991669	0.994562	0.994447	0.992006	6.38	7.59	24.17	20.41
Q9W541	eIF-2B GDP-GTP exchange factor subunit epsilon	23	107	12	669	protein metabolism;other metabolic processes	cytosol;translational apparatus	enzyme regulator activity;nucleic acid binding activity;other molecular function	Recycling of eIF2:GDP	eIF2Bepsilon	1.093	1.911	2.089	1.135	1.841	0.998656	0.809239	0.964289	0.931101	0.992006	12.92	11.22	20.46	42.85
Q9VNA5	Proteasome subunit beta type-4	53	675	12	268	cell cycle OR cell proliferation;cell organization and biogenesis;protein metabolism;other metabolic processes	cytosol;nucleus;other cell component		Antigen processing: Ubiquitination & Proteasome degradation; Neddylation; Regulation of RAS by GAPs; ABC-family proteins mediated transport; Degradation of beta-catenin by the destruction complex; Ub-specific processing proteases; Activation of NF-kappaB in B cells; Oxygen-dependent proline hydroxylation of Hypoxia-inducible Factor Alpha; Cross-presentation of soluble exogenous antigens (endosome…	Prosbeta7	1.457	1.156	1.684	0.713	2.361	0.0140751	0.999685	0.994562	0.00106533	0.929636	39.94	18.32	24.61	32.93
P02283	Histone H2B	64	1698	12	123	cell organization and biogenesis	nucleus;other cell component	nucleic acid binding activity;other molecular function	RUNX1 regulates genes involved in megakaryocyte differentiation and platelet function; Ub-specific processing proteases; HATs acetylate histones; E3 ubiquitin ligases ubiquitinate target proteins	His2B	0.896	1.051	0.942	0.93	1.013	0.765854	0.99616	0.994562	0.883449	0.992006	7.49	13.19	15.92	9.58
Q9VM33	Elongation factor G, mitochondrial	19	147	12	745	protein metabolism;other metabolic processes	mitochondrion;nucleus	nucleic acid binding activity;other molecular function	Mitochondrial translation elongation	mEFG1	0.998	1.123	1.121	0.868	1.292	0.998656	0.999708	0.996701	0.800567	0.992006	13.52	12.01	12.95	10.22
Q7KRU8	Ferritin	61	1046	12	205	transport;other biological processes	ER/Golgi;other cell component	other molecular function		Fer1HCH	0.768	1.137	0.873	1.007	0.867	0.108548	0.999685	0.994562	0.995836	0.992006	9.76	6.6	17.74	29.74
Q9VQ76	THO complex subunit 2	9	114	12	1641	RNA metabolism OR transcription;other metabolic processes;stress response;transport;other biological processes	nucleus	nucleic acid binding activity		tho2	1.459	1.064	1.552	0.863	1.799	0.385578	0.991669	0.994562	0.931101	0.992006	30.56	17.33	28.33	20.8
Q9V774	Probable cytochrome P450 6a21	30	167	12	504		other membranes;ER/Golgi	other molecular function		Cyp6a21	0.643	1.898	1.22	1.214	1.005	0.0318141	0.749275	0.997675	0.625097	0.992006	38.94	28.31	9.79	13.77
Q9VU38	Adenosine kinase	49	252	12	345	other metabolic processes	nucleus	kinase activity;other molecular function	Ribavirin ADME; Purine salvage	Adk2	1.162	0.705	0.819	0.98	0.836	0.931204	0.830839	0.994562	0.994447	0.992006	6	13.46	16.78	7.67
Q0KHQ2	Uncharacterized protein, isoform C	8	46	12	1997	transport	other membranes;other cell component	transporter activity;other molecular function		CG1819	0.829	0.974	0.808	0.868	0.931	0.767213	0.991669	0.994562	0.931101	0.992006	37.93	21.41	14.92	25.57
Q9W259	FI23916p1	38	169	12	503	cell adhesion;cell organization and biogenesis;developmental processes	plasma membrane;other membranes;other cell component	other molecular function	Recycling pathway of L1; Interaction between L1 and Ankyrins; Signal transduction by L1	13506	1.007	0.643	0.648	1.1	0.589	0.998656	0.782552	0.955797	0.939929	0.866487	7.07	15.19	18.23	18.45
M9PFX4	Cuticular protein 76Bd, isoform C	20	78	12	1231	developmental processes	extracellular matrix	other molecular function		Cpr76Bd	1.223	0.287	0.35	1.111	0.315	0.988302	0.0233661	0.300648	0.939467	0.103783	38.18	41.88	49.49	28.73
Q9W0X0	Epithelial membrane protein, isoform B	26	165	12	551	transport	plasma membrane;other membranes;other cell component	other molecular function	Neutrophil degranulation; Platelet degranulation ; Intracellular metabolism of fatty acids regulates insulin secretion; Cross-presentation of particulate exogenous antigens (phagosomes)	emp	1.189	0.774	0.92	0.991	0.929	0.913421	0.945683	0.994562	0.994447	0.992006	15.88	6.38	8.41	11.95
Q9VKK1	Enhancer of mRNA-decapping protein 4 homolog	10	57	12	1354	cell organization and biogenesis;RNA metabolism OR transcription;other metabolic processes;stress response;developmental processes;other biological processes	other cell component		mRNA decay by 5' to 3' exoribonuclease	Ge-1	1.421	1.407	1.999	1.354	1.477	0.443498	0.991669	0.994562	0.50125	0.992006	34.67	16.58	46.01	20.25
Q94915	Rhythmically expressed gene 2 protein	65	222	12	260		nucleus			Reg-2	0.921	1.406	1.295	1.259	1.029	0.954286	0.991669	0.996106	0.342491	0.992006	18.51	13.44	7.46	15.04
Q9VJH8	FI03416p	30	203	12	543		other membranes	other molecular function	Paracetamol ADME; Glycosphingolipid metabolism; Prednisone ADME	Ugt37D1	0.818	1.246	1.018	1.161	0.877	0.55999	0.991669	0.994562	0.747899	0.992006	24.34	24.1	19.87	28.54
P08111	Lethal(2) giant larvae protein	14	141	12	1161	cell cycle OR cell proliferation;cell organization and biogenesis;transport;developmental processes;other biological processes	extracellular matrix;plasma membrane;other membranes;cytoskeleton;ER/Golgi;other cell component	enzyme regulator activity;cytoskeletal activity;other molecular function		l(2)gl	0.787	0.818	0.644	0.93	0.692	0.166997	0.988593	0.994562	0.886359	0.992006	25.29	23.8	15.74	11.77
O97479	FI05212p	41	327	12	360	other metabolic processes		other molecular function		Sodh1	1.059	3.438	3.64	1.088	3.345	0.998656	0.0987364	0.409396	0.961246	0.42462	15.71	13.53	28.18	22.54
Q0KIE6	Beta-Mannosidase, isoform F	24	64	12	778	protein metabolism;other metabolic processes	other cytoplasmic organelle	other molecular function		beta-Man	1.325	1.219	1.616	1.039	1.556	0.744762	0.999685	0.994562	0.994447	0.992006	39.67	16.22	23.08	30.49
A0A0S0X8K7	Mitochondrial import inner membrane translocase subunit TIM50	32	161	12	428	transport	other membranes;mitochondrion	other molecular function		ttm50	1.023	1.008	1.032	0.891	1.158	0.998656	0.991669	0.994562	0.80022	0.999391	7.35	5.75	7.17	17.41
P61851	Superoxide dismutase [Cu-Zn]	91	780	12	153	other metabolic processes;stress response;other biological processes	other cytoplasmic organelle;other cell component	other molecular function		Sod1	0.953	1.271	1.211	1.002	1.209	0.998656	0.991669	0.996701	0.994447	0.992762	11.31	7.9	5.91	7.47
M9PJN8	Glyceraldehyde-3-phosphate dehydrogenase	97	5693	12	332	other metabolic processes		other molecular function		Gapdh2	0.87	1.129	0.982	1.007	0.976	0.610425	0.999685	0.994562	0.995836	0.992006	18.67	12.44	9.26	20.18
Q9W555	Coatomer subunit delta	30	187	12	532	transport;developmental processes;other biological processes	other membranes;ER/Golgi		COPI-dependent Golgi-to-ER retrograde traffic; COPI-mediated anterograde transport	deltaCOP	0.865	1.614	1.395	0.986	1.415	0.612297	0.976218	0.994562	0.994447	0.992006	6.66	9.55	20.45	11.07
Q5BI50	Cullin 4, isoform A	17	119	12	821	cell organization and biogenesis;protein metabolism;DNA metabolism;other metabolic processes;stress response;other biological processes	nucleus;other cell component	other molecular function	Neddylation; DNA Damage Recognition in GG-NER; Formation of Incision Complex in GG-NER; Formation of TC-NER Pre-Incision Complex; Dual incision in TC-NER; Gap-filling DNA repair synthesis and ligation in TC-NER; Dual Incision in GG-NER; Recognition of DNA damage by PCNA-containing replication complex	Cul4	1.018	1.672	1.701	1.008	1.687	0.998656	0.948028	0.994562	0.999436	0.992006	15.39	19.38	24.59	26.57
Q9V3V9	Endonuclease G inhibitor, isoform A	54	155	12	359	other biological processes	nucleus	enzyme regulator activity;other molecular function		EndoGI	2.183	0.618	1.349	0.85	1.588	2.59628e-05	0.749275	0.994562	0.632475	0.992006	103.85	29.1	41.33	60.52
Q03334	40S ribosomal protein S13	52	771	12	151	protein metabolism;other metabolic processes	cytosol;translational apparatus;nucleus;other cell component	nucleic acid binding activity;other molecular function	Nonsense Mediated Decay (NMD) enhanced by the Exon Junction Complex (EJC); Major pathway of rRNA processing in the nucleolus and cytosol; L13a-mediated translational silencing of Ceruloplasmin expression; Translation initiation complex formation; Formation of a pool of free 40S subunits; Formation of the ternary complex, and subsequently, the 43S complex; Ribosomal scanning and start codon recogn…	RpS13	0.873	1.932	1.687	0.912	1.851	0.627816	0.888938	0.994562	0.795274	0.992006	28.15	16.49	12.16	13.74
Q95SI7	GH23390p	67	347	12	293			other molecular function		Dmel\CG6028	1.173	1.04	1.22	1.223	0.997	0.796551	0.991669	0.9983	0.262866	0.992006	7.93	15.06	9.16	6.87
Q9VBT8	IP11925p	37	150	12	420			other molecular function		CT33083	1.09	0.845	0.921	0.954	0.966	0.998656	0.982739	0.994562	0.963131	0.992006	16.86	20.01	12.3	28.14
Q9VTY2	Uncharacterized protein, isoform A	56	177	12	317		cytosol	other molecular function	Pregnenolone biosynthesis; RA biosynthesis pathway; Retinoid metabolism and transport; Prednisone ADME; Estrogen biosynthesis; Synthesis of bile acids and bile salts via 7alpha-hydroxycholesterol; Synthesis of bile acids and bile salts via 24-hydroxycholesterol; Synthesis of bile acids and bile salts via 27-hydroxycholesterol; Synthesis of Prostaglandins (PG) and Thromboxanes (TX); Fructose biosy…	anon-WO0172774.89	1.026	0.997	1.023	0.981	1.043	0.999628	0.991669	0.994562	0.994447	0.992006	25.51	23.5	24.01	17.95
Q8INW7	Paxillin	41	320	12	557	cell organization and biogenesis;RNA metabolism OR transcription;other biological processes	plasma membrane;other membranes;cytoskeleton;other cell component	other molecular function		Pax	0.993	0.856	0.85	1.006	0.845	0.998656	0.988593	0.994562	0.994447	0.992006	5.83	11.67	12.67	5.65
Q9VK60	GH25425p	58	277	12	257	other biological processes	cytosol		MAP2K and MAPK activation; Negative regulation of MAPK pathway	Dmel\CG6180	1.111	1.1	1.222	1	1.221	0.948212	0.999685	0.997675	0.994447	0.992006	25.39	16.52	11.46	9.47
P54358	DNA polymerase delta catalytic subunit	14	103	12	1092	DNA metabolism;other metabolic processes;stress response	nucleus	nucleic acid binding activity;other molecular function	Removal of the Flap Intermediate	PolD1	1.993	1.475	2.939	0.901	3.263	0.00395026	0.991669	0.735135	0.957957	0.461524	56.74	35.98	64.9	54.7
Q9XZ29	EG:BACR25B3.9 protein	14	64	12	1212	cell cycle OR cell proliferation;cell organization and biogenesis;DNA metabolism;other biological processes	cytoskeleton;nucleus;other cell component	cytoskeletal activity;other molecular function	COPI-dependent Golgi-to-ER retrograde traffic; Kinesins	Klp3A	2.408	2.2	5.297	1.366	3.878	0.000321681	0.810353	0.0891931	0.64642	0.293861	69.65	46.08	49.6	35.14
Q7K0B6	Glutathione S transferase T1	46	200	12	228	other metabolic processes;other biological processes	other cell component	other molecular function	Glutathione conjugation	GstT1	1.343	0.995	1.336	1.134	1.177	0.307846	0.991669	0.996701	0.835779	0.999838	28.96	17.06	21.11	16.96
Q9U5L1	Signal recognition particle receptor subunit alpha homolog	20	175	12	614	cell organization and biogenesis;transport;developmental processes;other biological processes	other membranes;ER/Golgi	nucleic acid binding activity;other molecular function		SrpRalpha	0.928	1.369	1.271	1.021	1.244	0.982071	0.991669	0.996701	0.995715	0.992006	10.03	13.97	11.06	11.37
M9PE30	Transgelin	75	397	12	175	signal transduction;other biological processes	cytoskeleton	nucleic acid binding activity		Chd64	0.958	0.982	0.941	0.995	0.946	0.998656	0.991669	0.994562	0.994447	0.992006	18.96	11.49	4.51	4.59
A0A0B4K6U6	Squid, isoform E	42	524	12	308			nucleic acid binding activity		sqd	0.964	1.116	1.076	1.01	1.065	0.998656	0.999685	0.996106	0.999219	0.993518	10.61	13.13	13.45	9.69
Q9V3G7	26S proteasome non-ATPase regulatory subunit 6	33	256	12	389	protein metabolism;other metabolic processes	cytosol;nucleus;other cell component		Neutrophil degranulation; AUF1 (hnRNP D0) binds and destabilizes mRNA; Antigen processing: Ubiquitination & Proteasome degradation; Neddylation; Regulation of RAS by GAPs; ABC-family proteins mediated transport; Degradation of beta-catenin by the destruction complex; Ub-specific processing proteases; Activation of NF-kappaB in B cells; Oxygen-dependent proline hydroxylation of Hypoxia-inducible F…	Rpn7	1.236	1.495	1.848	0.884	2.091	0.417611	0.991669	0.994562	0.707853	0.992006	22.11	18.25	23.3	20.54
Q9VD00	FI07666p	50	200	12	278			other molecular function	Phase I - Functionalization of compounds	Dmel\CG5377	1.141	1.034	1.18	1.065	1.108	0.984445	0.991669	0.9983	0.976034	0.993518	10.85	69.13	11.88	7.87
Q9VLG9	Argininosuccinate lyase, isoform B	29	127	12	469	other metabolic processes	cytosol	other molecular function	Urea cycle	Argl	0.918	0.773	0.71	0.866	0.819	0.896521	0.974852	0.994562	0.444949	0.992006	10.36	16.04	10.62	10.08
P26270	26S proteasome non-ATPase regulatory subunit 7	45	277	12	338	protein metabolism;other metabolic processes	cytosol;nucleus;other cell component		RUNX1 regulates transcription of genes involved in differentiation of HSCs; Neutrophil degranulation; Antigen processing: Ubiquitination & Proteasome degradation; Neddylation; Regulation of RAS by GAPs; ABC-family proteins mediated transport; Degradation of beta-catenin by the destruction complex; Ub-specific processing proteases; Activation of NF-kappaB in B cells; Oxygen-dependent proline hydro…	Rpn8	1.268	1.556	1.974	0.933	2.116	0.40348	0.988593	0.994562	0.933682	0.992006	23.54	16.65	27.71	18.31
O02195	Eukaryotic translation initiation factor 3 subunit I	54	549	12	326	cell organization and biogenesis;protein metabolism;other metabolic processes	translational apparatus;other cell component	nucleic acid binding activity	L13a-mediated translational silencing of Ceruloplasmin expression; Translation initiation complex formation; Formation of a pool of free 40S subunits; Formation of the ternary complex, and subsequently, the 43S complex; Ribosomal scanning and start codon recognition	eIF3i	1.05	1.339	1.406	0.965	1.457	0.998656	0.991669	0.994562	0.976694	0.992006	12.3	15.36	23.18	15.02
P82147	Protein lethal(2)essential for life	64	447	12	187	cell organization and biogenesis;protein metabolism;other metabolic processes;stress response;other biological processes	cytoskeleton;other cell component	other molecular function	HSF1-dependent transactivation	l(2)efl	0.983	1.02	1.003	1.013	0.99	0.998656	0.991669	0.996106	0.999871	0.992006	7.07	12.02	5.07	3.59
A0A0B4LJ12	Nucleoside diphosphate kinase	69	1478	12	153	other metabolic processes		kinase activity;other molecular function		awd	1.026	1.625	1.668	1.119	1.49	0.998656	0.973991	0.994562	0.807902	0.992006	14.15	9.94	14.21	9.19
Q9VRM8	Alkaline phosphatase	31	106	12	524	other metabolic processes	other cell component	other molecular function	Intra-Golgi traffic	Alp10	0.358	1.01	0.361	1.304	0.277	3.8991e-07	0.991669	0.300648	0.27044	0.0539837	52.77	54.97	15.77	13.62
Q8MRM0	GH16740p	58	161	12	237	other metabolic processes;other biological processes	other cell component	other molecular function	Glutathione conjugation	GstT4	0.918	1.149	1.055	1	1.055	0.954286	0.999685	0.994562	0.994447	0.992006	14.51	16.98	17.83	11.04
Q9VXK5	Putative rRNA methyltransferase	16	114	12	817	RNA metabolism OR transcription;other metabolic processes	nucleus;other cell component	other molecular function	Major pathway of rRNA processing in the nucleolus and cytosol	dSpb1	0.891	1.93	1.719	1.192	1.442	0.926852	0.890018	0.994562	0.831281	0.992006	22.27	13.49	12.2	20.57
Q24179	Protein sly1 homolog	25	96	12	639	stress response;transport;developmental processes;other biological processes	plasma membrane;other membranes;ER/Golgi	other molecular function	COPII-mediated vesicle transport; RHOA GTPase cycle	Slh	1.014	1.391	1.41	1.248	1.13	0.998656	0.991669	0.994562	0.666676	0.993518	15.93	3.69	26.35	26.52
Q9VQR2	NADH dehydrogenase [ubiquinone] 1 beta subcomplex subunit 10	65	392	12	159	cell organization and biogenesis	other membranes;mitochondrion	other molecular function	Complex I biogenesis	ND-PDSW	1.007	0.789	0.795	0.936	0.849	0.998656	0.982739	0.994562	0.913054	0.992006	6.2	11.67	12.13	10.76
Q5U0V7	Phosphoinositide 5-phosphatase	13	103	12	1218	cell organization and biogenesis;other metabolic processes;transport;other biological processes	other membranes;other cytoplasmic organelle;other cell component	nucleic acid binding activity;other molecular function	Clathrin-mediated endocytosis; Synthesis of PIPs at the plasma membrane; Synthesis of IP2, IP, and Ins in the cytosol; Synthesis of IP3 and IP4 in the cytosol	Synj	1.051	1.06	1.114	0.917	1.215	0.998656	0.995874	0.996701	0.93159	0.992006	12.42	4.75	11.23	13.11
Q7K0P0	Juvenile hormone-inducible protein 26	33	148	12	439	other biological processes		other molecular function		JhI-26	0.899	0.845	0.759	0.879	0.864	0.901142	0.972761	0.994562	0.728293	0.992006	35.87	23.71	7.95	22.4
Q9VN13	Sideroflexin-1-3	39	201	12	321	other metabolic processes;transport	other membranes;mitochondrion	transporter activity		Sfxn1-3	1.048	0.961	1.007	1.042	0.966	0.998656	0.991669	0.994562	0.994447	0.992006	30.42	17.26	13.39	10.26
Q9VVV8	SET and MYND domain containing, arthropod-specific, member 2	25	131	12	530	other biological processes	other cell component	other molecular function		SmydA-2	0.935	0.734	0.687	0.997	0.689	0.998656	0.928382	0.994562	0.994447	0.992006	20.38	17.47	15.12	8.58
X2JIQ5	60S ribosomal protein L17	51	445	12	186	protein metabolism;other metabolic processes	translational apparatus	other molecular function		RpL17	0.865	1.83	1.582	0.826	1.915	0.571572	0.913109	0.994562	0.189602	0.992006	20.94	11.69	16.77	23.42
Q9VG86	Fatty acyl-CoA reductase	29	207	12	501	other metabolic processes	other membranes;other cytoplasmic organelle;other cell component	other molecular function		anon-WO0140519.58	0.997	1.297	1.293	0.852	1.518	0.998656	0.991669	0.997675	0.535415	0.992006	17.91	9.46	12.02	15.58
Q7KV34	CHK domain-containing protein	29	90	12	635			other molecular function		pkm	0.78	1.29	1.006	1.217	0.826	0.394363	0.991669	0.994562	0.538157	0.992006	21.66	20.29	13.04	17.63
Q9V9X4	Methylthioribose-1-phosphate isomerase	46	226	12	364	other metabolic processes	nucleus;other cell component	other molecular function	Methionine salvage pathway		1.132	0.744	0.842	0.927	0.908	0.983502	0.888938	0.994562	0.931101	0.992006	15.36	15.22	12.98	13.33
A4V4A1	Kinesin-like protein	19	106	12	805	other biological processes	cytoskeleton	cytoskeletal activity;other molecular function		Klp10A	1.502	1.783	2.678	1.112	2.409	0.119219	0.932677	0.73978	0.939976	0.682527	34.51	25.44	46.81	27.14
Q7K4T8	LD23856p	27	185	12	458		mitochondrion;other cell component	other molecular function		FBgn 33734	0.815	0.786	0.64	0.866	0.739	0.493586	0.936111	0.964289	0.685378	0.992006	20.9	20.4	9.4	18.06
P32392	Actin-related protein 3	36	148	12	418	cell cycle OR cell proliferation;cell organization and biogenesis;transport;developmental processes;other biological processes	cytosol;cytoskeleton;nucleus;other cell component	cytoskeletal activity;other molecular function	Regulation of actin dynamics for phagocytic cup formation; RHO GTPases Activate WASPs and WAVEs; Clathrin-mediated endocytosis; EPHB-mediated forward signaling	Arp3	1.156	1.15	1.329	0.879	1.512	0.966647	0.999685	0.994562	0.837688	0.992006	26.29	24.72	29.94	27.05
Q9VHC7	FI21236p1	26	219	12	632	cell organization and biogenesis;stress response;developmental processes;other biological processes	nucleus;other cell component	nucleic acid binding activity		rump	0.98	1.48	1.451	1.008	1.439	0.998656	0.991669	0.994562	0.99592	0.992006	4.49	8.88	9.83	9.96
Q95RI5	Failed axon connections	42	190	12	418	cell organization and biogenesis;developmental processes;other biological processes				fax	0.818	0.94	0.769	1.016	0.757	0.51124	0.991669	0.994562	0.99878	0.992006	23.27	15.56	12.71	14.09
M9PEZ7	Z band alternatively spliced PDZ-motif protein 67, isoform E	22	162	12	725	cell organization and biogenesis;other biological processes	cytoskeleton;other cell component	cytoskeletal activity		Zasp67	1.055	0.772	0.815	1.024	0.795	0.998656	0.914961	0.994562	0.994447	0.992006	15.82	14	10.96	6.33
A0A0B4K851	Ran-binding protein M, isoform E	21	115	12	961					RanBPM	1.103	1.331	1.468	1.037	1.415	0.953223	0.991669	0.994562	0.994447	0.992006	38.48	32.6	26.41	24.6
P33438	Glutactin	20	248	12	1026	cell organization and biogenesis;stress response;developmental processes	non-structural extracellular;extracellular matrix;other cell component			Glt	0.964	1.005	0.969	1.14	0.85	0.998656	0.991669	0.994562	0.701832	0.992006	13.32	19.13	17.16	8.17
Q7KNS3	Lissencephaly-1 homolog	39	120	12	411	cell cycle OR cell proliferation;cell organization and biogenesis;transport;developmental processes;other biological processes	cytosol;cytoskeleton;nucleus;other cell component	cytoskeletal activity;other molecular function	Antigen processing: Ubiquitination & Proteasome degradation; Neddylation; Activation of NF-kappaB in B cells; Downstream TCR signaling; FCERI mediated NF-kB activation; Dectin-1 mediated noncanonical NF-kB signaling; NIK-->noncanonical NF-kB signaling; COPI-independent Golgi-to-ER retrograde traffic; Regulation of PLK1 Activity at G2/M Transition	Lis-1	1.382	1.316	1.819	1.025	1.775	0.140674	0.991669	0.994562	0.994447	0.992006	21.65	19.81	16.65	11.92
Q9W0J9	GH07301p	52	280	12	322		nucleus	other molecular function		CT9987	1.048	1.09	1.142	1.58	0.723	0.998656	0.993922	0.996106	7.9072e-05	0.992006	15.52	9.65	17.65	7.07
A1ZB72	Glutathione S transferase E7	60	128	12	223	other metabolic processes;other biological processes	other cell component	other molecular function		GstE7	0.88	1.412	1.243	1.298	0.958	0.917748	0.991669	0.997675	0.417485	0.992006	20.05	23.35	12.89	13.47
Q9XZ53	Dolichyl-diphosphooligosaccharide--protein glycotransferase	18	169	12	774	protein metabolism;other metabolic processes	other membranes;ER/Golgi	other molecular function		Stt3B	0.959	1.728	1.658	1.138	1.457	0.998656	0.869247	0.994562	0.884444	0.992006	8.79	13.6	16.53	12.63
Q9VC93	Dis3, isoform A	15	99	12	982	cell cycle OR cell proliferation;RNA metabolism OR transcription;other metabolic processes;stress response;other biological processes	nucleus;other cytoplasmic organelle;other cell component	nucleic acid binding activity;other molecular function	Butyrate Response Factor 1 (BRF1) binds and destabilizes mRNA; Tristetraprolin (TTP, ZFP36) binds and destabilizes mRNA; mRNA decay by 3' to 5' exoribonuclease	Dis3	1.126	1.624	1.828	1.118	1.635	0.998656	0.973991	0.994562	0.957957	0.992006	15.05	16.16	32.54	18.41
Q9VSC5	GM09977p	45	143	12	331	other biological processes		other molecular function	N-glycan trimming in the ER and Calnexin/Calreticulin cycle	anon-WO0172774.138	1.22	1.161	1.416	0.918	1.542	0.792543	0.999685	0.994562	0.918539	0.992006	33.09	13.97	27.42	16.64
P16163	Uricase	57	177	12	352	other metabolic processes	other cytoplasmic organelle	other molecular function		Uro	0.927	1.313	1.218	1.796	0.678	0.978165	0.991669	0.996106	2.4604e-06	0.992006	20.77	12.09	20.73	21.39
Q7K0L5	LP01562p	32	170	12	599	other metabolic processes	plasma membrane;other membranes	other molecular function		veil	0.916	1.592	1.458	1.171	1.245	0.954286	0.965462	0.994562	0.848232	0.992006	27.33	13	6.23	13.21
X2JAU8	Protein nervous wreck	11	116	12	1075	cell-cell signaling;cell organization and biogenesis;other metabolic processes;other biological processes	plasma membrane;other membranes;ER/Golgi;other cytoplasmic organelle;other cell component	other molecular function		nwk	0.834	0.881	0.734	1.021	0.719	0.77453	0.991669	0.994562	0.999436	0.992006	16.32	18.08	18.44	8.15
Q9VXZ8	BcDNA.GH02901	35	200	12	597	other metabolic processes	mitochondrion	other molecular function		pdgy	1.032	0.981	1.012	1.096	0.924	0.999628	0.991669	0.994562	0.939976	0.992006	23.5	16.86	17.72	16.54
C0HKA1	40S ribosomal protein S14b	70	693	12	151	cell organization and biogenesis;protein metabolism;RNA metabolism OR transcription;other metabolic processes	cytosol;translational apparatus	nucleic acid binding activity;other molecular function	Nonsense Mediated Decay (NMD) enhanced by the Exon Junction Complex (EJC); Major pathway of rRNA processing in the nucleolus and cytosol; L13a-mediated translational silencing of Ceruloplasmin expression; Translation initiation complex formation; Formation of a pool of free 40S subunits; Formation of the ternary complex, and subsequently, the 43S complex; Ribosomal scanning and start codon recogn…	RpS14b	1.089	1.754	1.911	0.978	1.954	0.983502	0.936111	0.994562	0.99027	0.992006	7.99	7.6	16.77	17.85
Q9VTN9	FI03238p	45	157	12	417	other metabolic processes	mitochondrion	other molecular function		Gcat	1.055	2.295	2.421	1.092	2.216	0.998656	0.541025	0.856704	0.963131	0.821048	18.22	6.23	16.04	2.13
Q9VYV4	Amun, isoform A	35	125	12	550	developmental processes;other biological processes	nucleus			Amun	1.371	1.769	2.425	1.141	2.124	0.361422	0.888938	0.858925	0.91013	0.924188	34.05	26.95	57.68	40.02
A1Z8Y3	Cuticular protein 49Ab	61	198	12	259	developmental processes	extracellular matrix	other molecular function		Cpr49Ab	1.047	0.693	0.725	0.947	0.766	0.998656	0.921724	0.994562	0.933682	0.992006	5.79	10.63	17.04	17.57
O76464	Nitrilase and fragile histidine triad fusion protein NitFhit	25	93	12	460	other metabolic processes		other molecular function		NitFhit	0.889	0.969	0.861	1.031	0.835	0.938053	0.991669	0.994562	0.994447	0.992006	53.6	34.6	25.06	24.61
Q5BIJ2	Serine/threonine protein phosphatase 2A regulatory subunit	22	134	11	656	cell-cell signaling;cell organization and biogenesis;protein metabolism;other metabolic processes;signal transduction;other biological processes	cytosol;nucleus;other cell component	enzyme regulator activity		wrd	1.017	1.39	1.413	1.272	1.111	0.998656	0.991669	0.994562	0.37985	0.998202	13.88	14.41	19.97	20.47
Q9VS34	60S ribosomal protein L18	52	427	11	188	protein metabolism;other metabolic processes	cytosol;translational apparatus	nucleic acid binding activity;other molecular function	Nonsense Mediated Decay (NMD) enhanced by the Exon Junction Complex (EJC); L13a-mediated translational silencing of Ceruloplasmin expression; Formation of a pool of free 40S subunits; Nonsense Mediated Decay (NMD) independent of the Exon Junction Complex (EJC); SRP-dependent cotranslational protein targeting to membrane; GTP hydrolysis and joining of the 60S ribosomal subunit	RpL18	0.978	1.952	1.908	0.97	1.968	0.998656	0.882184	0.994562	0.974255	0.992006	10.58	10.04	15.4	17.49
O18333	GH01619p	52	218	11	213	transport;signal transduction;other biological processes	other membranes;ER/Golgi;other cell component	other molecular function	RAB geranylgeranylation; Golgi Cisternae Pericentriolar Stack Reorganization	Rab2	1.059	1.113	1.179	1	1.179	0.998656	0.999685	0.997675	0.994447	0.999838	6.46	6.75	8.46	5.94
Q960M4	Peroxiredoxin-5	56	480	11	190	other metabolic processes;stress response;other biological processes	cytosol;mitochondrion;nucleus;other cytoplasmic organelle;other cell component	other molecular function	TP53 Regulates Metabolic Genes; Detoxification of Reactive Oxygen Species	Prx5	1.019	0.775	0.79	0.974	0.811	0.999628	0.976218	0.994562	0.984789	0.992006	16.64	6.12	14.79	15.46
Q9VHX4	LD24679p	40	232	11	329		cytosol	other molecular function	RA biosynthesis pathway; Retinoid metabolism and transport; Prednisone ADME; Estrogen biosynthesis; Synthesis of bile acids and bile salts via 7alpha-hydroxycholesterol; Synthesis of bile acids and bile salts via 24-hydroxycholesterol; Synthesis of bile acids and bile salts via 27-hydroxycholesterol; Synthesis of Prostaglandins (PG) and Thromboxanes (TX)	Dmel\CG2767	0.995	1.034	1.029	1.04	0.989	0.998656	0.991669	0.994562	0.994447	0.992006	25.26	17.14	4.77	16.23
P04359	60S ribosomal protein L32	43	652	11	134	protein metabolism;other metabolic processes	cytosol;translational apparatus;nucleus;other cell component	other molecular function	Nonsense Mediated Decay (NMD) enhanced by the Exon Junction Complex (EJC); L13a-mediated translational silencing of Ceruloplasmin expression; Formation of a pool of free 40S subunits; Nonsense Mediated Decay (NMD) independent of the Exon Junction Complex (EJC); SRP-dependent cotranslational protein targeting to membrane; GTP hydrolysis and joining of the 60S ribosomal subunit	RpL32	1.006	1.839	1.85	0.758	2.439	0.998656	0.909462	0.994562	0.0211447	0.884753	6.34	14.11	20.15	23.44
Q24572	Chromatin assembly factor 1 p55 subunit	28	156	11	430	cell organization and biogenesis;protein metabolism;DNA metabolism;other metabolic processes;developmental processes;other biological processes	nucleus;other cell component	nucleic acid binding activity;other molecular function	Neddylation; Transcriptional Regulation by E2F6; HDACs deacetylate histones; Regulation of TP53 Activity through Acetylation; Regulation of PTEN gene transcription; G0 and Early G1; Oxidative Stress Induced Senescence	Caf1-55	2.534	0.921	2.333	0.943	2.475	3.79265e-09	0.991669	0.955797	0.939976	0.927633	62.78	39.61	49.21	38.51
A0A0B4LIA3	Non-specific serine/threonine protein kinase	24	110	11	530	protein metabolism;other metabolic processes		kinase activity;other molecular function		Akt	1.01	1.287	1.3	1.029	1.263	0.998656	0.991669	0.996106	0.994447	0.992006	15.04	16.77	18.83	16.69
Q9VTB3	Guanylate kinase	43	160	11	233	other metabolic processes	cytosol;nucleus;other cell component	kinase activity;other molecular function	Azathioprine ADME; Interconversion of nucleotide di- and triphosphates	Dmel\CG11811	0.847	1.918	1.625	1.146	1.417	0.635396	0.838041	0.994562	0.831281	0.992006	17.31	16.07	11.31	12.63
O62530	Adaptor protein complex 2, mu subunit, isoform A	30	160	11	437	transport	plasma membrane;other membranes;other cell component	other molecular function	VLDLR internalisation and degradation; Cargo recognition for clathrin-mediated endocytosis; LDL clearance; Recycling pathway of L1; Retrograde neurotrophin signalling; Trafficking of GluR2-containing AMPA receptors; EPH-ephrin mediated repulsion of cells; Formation of annular gap junctions; WNT5A-dependent internalization of FZD4; WNT5A-dependent internalization of FZD2, FZD5 and ROR2	AP-2mu	1.027	1.039	1.067	0.922	1.158	0.999628	0.991669	0.996106	0.923002	0.999838	15.22	6.08	8.83	9.05
Q7K2X8	Nucleoporin seh1	47	86	11	354	cell cycle OR cell proliferation;cell organization and biogenesis;stress response;transport;other biological processes	nucleus;other cytoplasmic organelle;other cell component	other molecular function	Transport of the SLBP independent Mature mRNA; Transport of the SLBP Dependant Mature mRNA; Transport of Mature mRNA Derived from an Intronless Transcript; Transport of Mature mRNA derived from an Intron-Containing Transcript; Nuclear Pore Complex (NPC) Disassembly; Regulation of HSF1-mediated heat shock response; SUMOylation of SUMOylation proteins; SUMOylation of chromatin organization proteins…	Nup44A	1.298	2.438	3.164	1.66	1.906	0.191229	0.624612	0.735135	4.91755e-07	0.992006	41.62	55.99	101.79	66.95
Q9VJQ3	RH54244p	36	105	11	438		non-structural extracellular			yellow-c	0.884	0.987	0.873	1.013	0.862	0.852288	0.991669	0.994562	0.999436	0.992006	9.25	8.51	9.75	7.74
Q9VP51	LD40450p	36	126	11	358		other membranes	other molecular function		Dmel\CG11309	0.989	1.088	1.076	1.084	0.993	0.998656	0.999685	0.996106	0.963131	0.992006	17.51	10.82	16.99	14.8
A0A0B4JCU8	3-hydroxyisobutyrate dehydrogenase	49	375	11	324	other metabolic processes		other molecular function		Dmel\CG15093	0.925	1.749	1.618	1.29	1.254	0.922712	0.93661	0.994562	0.0631113	0.992006	12.42	4.98	27.09	9.11
Q7K4Q9	3-hydroxy-3-methylglutaryl coenzyme A synthase	43	131	11	465	other metabolic processes		other molecular function	Cholesterol biosynthesis; Synthesis of Ketone Bodies	Hmgs	0.934	0.752	0.702	0.994	0.706	0.998656	0.936111	0.982759	0.994447	0.992006	13.98	17.04	18.54	11.92
Q9VQI7	Peroxiredoxin 6005	54	147	11	222	other metabolic processes;other biological processes	cytosol;mitochondrion	other molecular function	Neutrophil degranulation	Prx6a	1.064	1.294	1.376	1.057	1.302	0.998656	0.991669	0.994562	0.994447	0.992006	15.31	10.07	17.42	4.42
A0A0B4KF40	Sulfotransferase 3, isoform C	25	84	11	526	other metabolic processes;stress response	cytosol;other cell component	other molecular function	Cytosolic sulfonation of small molecules; Paracetamol ADME	St3	1.042	0.687	0.716	1.212	0.591	0.999628	0.891725	0.994562	0.704301	0.968262	22.3	13	16.3	12.32
Q9VAU1	Snustorr, isoform A	20	143	11	808	transport;developmental processes	plasma membrane;other membranes;other cell component	transporter activity;other molecular function		snu	1.049	0.959	1.005	1.075	0.935	0.998656	0.991669	0.994562	0.976694	0.992006	17.58	14.45	7.6	13.85
Q9VWD1	Cytochrome c oxidase subunit	69	546	11	96	cell organization and biogenesis	other membranes;mitochondrion	other molecular function	Cytoprotection by HMOX1; TP53 Regulates Metabolic Genes; Respiratory electron transport	COX6B	0.842	0.893	0.752	0.834	0.902	0.433178	0.991669	0.994562	0.222779	0.992006	10.83	36.34	14.39	20.77
Q8INW5	MIP27352p	36	262	11	306			other molecular function		Dmel\CG10237	1.057	1.489	1.574	1.027	1.532	0.998656	0.991669	0.994562	0.994447	0.992006	8.27	5.82	4.87	9.66
Q9VV72	Multiple inositol polyphosphate phosphatase 1	34	156	11	467	other metabolic processes;developmental processes;other biological processes	non-structural extracellular;plasma membrane;other membranes;other cell component	other molecular function	Synthesis of IPs in the ER lumen	Mipp1	1.007	0.752	0.758	1.024	0.74	0.998656	0.903432	0.994562	0.994447	0.992006	9.86	11.36	5.05	8.2
P54359	Septin-2	31	171	11	419	cell cycle OR cell proliferation;developmental processes;other biological processes	cytoskeleton;other cell component	other molecular function		Septin2	0.971	1.343	1.304	1.039	1.255	0.998656	0.991669	0.996106	0.994447	0.992006	6.56	8.33	11.31	16.64
A0A0B4K7C5	Peptidylprolyl isomerase	49	257	11	220	developmental processes;other biological processes	non-structural extracellular;ER/Golgi	other molecular function		Fkbp14	1.025	1.109	1.137	1.163	0.978	0.999501	0.997109	0.996106	0.800567	0.992006	22.42	11.47	14.76	8.48
Q9VS02	Uncharacterized protein	32	164	11	508	protein metabolism		other molecular function		Dmel\CG9953	1.801	1.482	2.668	1.182	2.258	0.00309559	0.988593	0.876317	0.738462	0.972462	43.05	27.94	39.45	24.93
P54385	Glutamate dehydrogenase, mitochondrial	68	3037	11	562	other metabolic processes	mitochondrion;other cell component	other molecular function	Transcriptional activation of mitochondrial biogenesis; Glutamate and glutamine metabolism	Gdh	0.917	0.922	0.846	1.06	0.798	0.888811	0.991669	0.994562	0.966973	0.992006	9.03	13.19	14.58	8.31
A0A0B4LFH2	Caspar, isoform C	25	109	11	690	protein metabolism;other metabolic processes;stress response;other biological processes	ER/Golgi;nucleus	other molecular function		casp	1.645	1.184	1.948	1.147	1.699	0.148546	0.997109	0.994562	0.931101	0.992006	46.25	24.45	49.89	23.16
A0A0B4K6N4	Tropomodulin, isoform N	27	171	11	567	cell organization and biogenesis	cytoskeleton;other cell component	cytoskeletal activity	Smooth Muscle Contraction; RHOBTB2 GTPase cycle	tmod	1.078	0.764	0.824	0.843	0.977	0.998656	0.911471	0.994562	0.491979	0.992006	19.64	10.78	20.14	26.93
Q9VBI2	UMP-CMP kinase	40	292	11	253	other metabolic processes	nucleus;other cell component	kinase activity;other molecular function	Interconversion of nucleotide di- and triphosphates	Cmpk	0.945	1.186	1.121	0.962	1.165	0.983502	0.997109	0.996106	0.95942	0.993959	11.41	8.24	10.68	10.26
Q9VFE7	Nuclear pore protein	19	62	11	796	cell organization and biogenesis;other metabolic processes;transport	other membranes;nucleus	other molecular function	Transport of the SLBP independent Mature mRNA; Transport of the SLBP Dependant Mature mRNA; Transport of Mature mRNA Derived from an Intronless Transcript; Transport of Mature mRNA derived from an Intron-Containing Transcript; Nuclear Pore Complex (NPC) Disassembly; Regulation of HSF1-mediated heat shock response; SUMOylation of SUMOylation proteins; SUMOylation of chromatin organization proteins…	Nup93-2	1.384	1.259	1.742	0.895	1.948	0.552673	0.999131	0.994562	0.957957	0.992006	29.89	16.15	44.97	24.75
Q9VQ29	Cytochrome b-c1 complex subunit Rieske, mitochondrial	53	1191	11	230	other metabolic processes;transport	other membranes;mitochondrion	transporter activity;other molecular function	Respiratory electron transport	RFeSP	0.995	0.723	0.719	1.072	0.671	0.998656	0.945683	0.994562	0.940794	0.992006	10.95	14.15	22.45	22.24
Q9VH64	LD29322p	30	193	11	379	other biological processes	ER/Golgi	signal transduction activity or receptor binding;other molecular function		Dmel\CG8507	0.965	2.037	1.965	1.076	1.826	0.998656	0.835153	0.994562	0.961415	0.992006	14.79	11.8	22.94	20.42
P07192	Maltase A3	24	72	11	574	other metabolic processes		other molecular function		Mal-A3	1.03	1.856	1.913	2.122	0.901	0.999628	0.888938	0.994562	3.51853e-05	0.992006	34.55	18.81	28.69	28.54
Q9VJD4	LD24721p	28	131	11	331	transport;other biological processes	other membranes;cytosol	other molecular function	Insertion of tail-anchored proteins into the endoplasmic reticulum membrane	Sgt	1.194	1.528	1.824	1.161	1.571	0.559305	0.988593	0.994562	0.576874	0.992006	32	34.44	41.08	30.23
Q9W3J5	Phenylalanine--tRNA ligase alpha subunit	23	157	11	498	protein metabolism;RNA metabolism OR transcription;other metabolic processes	other cell component	nucleic acid binding activity;other molecular function		alpha-PheRS	1.041	1.228	1.279	0.91	1.405	0.999628	0.995874	0.996701	0.873088	0.992006	10.15	4.79	27.31	27.55
M9ND86	Spellchecker1, isoform D	16	80	11	917	DNA metabolism;other metabolic processes;stress response	nucleus	nucleic acid binding activity;other molecular function		spel1	1.88	1.776	3.338	0.95	3.513	0.021457	0.952042	0.492886	0.994447	0.439641	54.82	37.37	64.17	63.64
Q9VRP3	AT08565p	54	164	11	287		cytosol;other cell component	other molecular function	RHOBTB2 GTPase cycle; RHOU GTPase cycle; RHOV GTPase cycle; RHOBTB1 GTPase cycle	Txl	1.994	1.236	2.465	1.294	1.905	0.000695475	0.991669	0.881918	0.290373	0.992006	50.84	32.24	31.88	26.18
Q7JMV3	Calcium/calmodulin dependent protein kinase I	40	130	11	405	protein metabolism;other metabolic processes	cytosol	kinase activity;other molecular function	Activation of RAC1 downstream of NMDARs	CaMKI	1.113	0.875	0.974	0.922	1.056	0.998656	0.988593	0.994562	0.931101	0.992762	19.09	24.85	20.3	25.33
B5RIR1	FI04125p	42	276	11	309	transport	plasma membrane;other membranes			nrv1	1.067	0.916	0.977	1.007	0.97	0.998656	0.991669	0.994562	0.995836	0.992006	7.4	8.6	6.57	4.3
Q9VKF6	V-type proton ATPase subunit a	19	204	11	814	transport;other biological processes	plasma membrane;other membranes;other cytoplasmic organelle	transporter activity;other molecular function	Neutrophil degranulation; Insulin receptor recycling; Transferrin endocytosis and recycling; Ion channel transport; ROS and RNS production in phagocytes; Amino acids regulate mTORC1	Vha100-5	1.045	2.022	2.113	1.017	2.077	0.998656	0.776221	0.987592	0.999871	0.992006	28.22	25.88	26.58	38.9
O18373	Inactive selenide, water dikinase-like protein	33	162	11	398	cell cycle OR cell proliferation;other metabolic processes;other biological processes	other cell component	kinase activity;other molecular function	Selenocysteine synthesis	Sps1	1.197	1.398	1.674	1.065	1.571	0.868376	0.991669	0.994562	0.989642	0.992006	7.93	17.85	15.25	26.64
Q9V9A7	Probable methylcrotonoyl-CoA carboxylase beta chain, mitochondrial	26	129	11	578	other metabolic processes;other biological processes	mitochondrion;other cell component	other molecular function	Biotin transport and metabolism; Branched-chain amino acid catabolism	Mccc2	0.967	0.866	0.838	1.025	0.817	0.998656	0.984089	0.994562	0.99592	0.992006	67.58	18.89	14	38.11
Q9VE34	Ectopic P granules protein 5 homolog	5	74	11	2455	cell organization and biogenesis;other metabolic processes	other cytoplasmic organelle;other cell component			Epg5	0.734	1.547	1.135	1.065	1.066	0.363272	0.988593	0.996106	0.994447	0.992006	11.43	36.1	14.47	17.11
M9PE54	Uncharacterized protein, isoform B	35	155	11	337	other metabolic processes		other molecular function		BVRA	0.895	0.973	0.871	0.628	1.387	0.879309	0.991669	0.994562	0.000565558	0.992006	15.96	19.19	13.8	18.48
E8NH77	SD15168p	24	76	11	634	other biological processes	cytoskeleton			sw	2.446	0.721	1.764	0.918	1.921	0.000228031	0.888938	0.994562	0.963131	0.992006	55.98	30.85	48.79	32.61
A0A0B4LHF7	RNA helicase	20	108	11	680		other cell component	nucleic acid binding activity;other molecular function		pit	0.828	1.978	1.639	0.823	1.991	0.65209	0.850294	0.994562	0.636074	0.992006	36.05	32.54	12.78	22.1
Q9VUH6	Myopic	9	47	11	1833	cell adhesion;cell cycle OR cell proliferation;cell organization and biogenesis;protein metabolism;other metabolic processes;transport;developmental processes;other biological processes	cytosol;other cytoplasmic organelle;other cell component			mop	1.112	0.966	1.074	0.89	1.207	0.956704	0.991669	0.996106	0.687698	0.993518	14.76	49.55	32.32	37.46
Q7KVX5	VAMP-associated protein 33kDa, isoform A	60	216	11	235	cell-cell signaling;cell organization and biogenesis;other metabolic processes;stress response;transport;developmental processes	non-structural extracellular;plasma membrane;other membranes;cytoskeleton;ER/Golgi;other cell component	other molecular function		Vap33	1.341	0.943	1.264	1.005	1.258	0.265887	0.991669	0.996701	0.995836	0.993518	29.28	14.69	18.44	18.26
A1Z6N5	FI13301p	36	156	11	440	cell organization and biogenesis	other cell component	other molecular function		Dmel\CG3270	1.085	0.806	0.874	1.017	0.859	0.998656	0.945683	0.994562	0.999871	0.992006	10.45	8.57	11.36	10.82
Q9W388	AP-1 complex subunit gamma	16	164	11	963	cell organization and biogenesis;transport;developmental processes	other membranes;ER/Golgi;other cytoplasmic organelle;other cell component	other molecular function		AP-1gamma	1.023	1.62	1.658	1.058	1.568	0.999628	0.948028	0.994562	0.994447	0.992006	15.43	12.94	25.12	11.86
M9PCH6	Omega, isoform H	21	88	11	784	protein metabolism	other membranes	other molecular function		ome	0.983	1.069	1.051	1.183	0.889	0.998656	0.995874	0.996106	0.692517	0.992006	17.01	18.19	16.93	9.14
Q7KUQ6	Limpet, isoform K	6	68	11	2147	stress response				Lmpt	1.039	1.623	1.686	1.252	1.347	0.998656	0.973991	0.994562	0.339703	0.992006	19.77	15.64	9.05	16.05
Q9VJZ6	LD40224p	67	245	11	216	other biological processes	cytosol;nucleus	other molecular function		Grx4	1.056	1.083	1.143	1.013	1.128	0.998656	0.99616	0.996701	0.999871	0.996032	7.99	18.37	13.86	6.22
P41094	40S ribosomal protein S18	49	917	11	152	protein metabolism;other metabolic processes	cytosol;translational apparatus;nucleus;other cell component	nucleic acid binding activity;other molecular function	Nonsense Mediated Decay (NMD) enhanced by the Exon Junction Complex (EJC); L13a-mediated translational silencing of Ceruloplasmin expression; Translation initiation complex formation; Formation of a pool of free 40S subunits; Formation of the ternary complex, and subsequently, the 43S complex; Ribosomal scanning and start codon recognition; Nonsense Mediated Decay (NMD) independent of the Exon Ju…	RpS18	1.09	1.87	2.039	1.031	1.977	0.983502	0.895346	0.994562	0.994447	0.992006	11.52	8.38	14.46	17.49
F3YDF1	ATP-dependent zinc metalloprotease YME1L	22	128	11	740	protein metabolism;other metabolic processes	other membranes;mitochondrion	other molecular function		YME1L	1.171	1.208	1.415	0.989	1.431	0.928092	0.991669	0.994562	0.994447	0.992006	17.02	16.33	20.8	28.51
Q7JXU4	Nucleolar GTP-binding protein 2	19	93	11	674	transport;developmental processes	nucleus	other molecular function		Ns2	0.654	2.454	1.605	0.788	2.038	0.144087	0.581788	0.994562	0.727669	0.992006	41.6	34.19	24.52	14.5
M9PBQ4	Apoptosis inducing factor, isoform C	25	126	11	738	other biological processes	other membranes;mitochondrion	other molecular function		AIF	1.011	1.167	1.179	1.068	1.105	0.998656	0.997109	0.997675	0.988285	0.993959	5.25	24.38	4.57	10.86
P23226	205 kDa microtubule-associated protein	10	221	11	1185	cell cycle OR cell proliferation;cell organization and biogenesis	cytoskeleton;other cell component			Map205	1.144	1.035	1.184	0.95	1.245	0.96785	0.991669	0.9983	0.959992	0.993518	15.7	11.42	19.41	5.25
Q9VIQ8	Cytochrome c oxidase subunit 4, isoform A	49	607	11	182	other metabolic processes	other membranes;mitochondrion		TP53 Regulates Metabolic Genes; Cytoprotection by HMOX1; Respiratory electron transport	COX4	1.544	0.375	0.579	0.868	0.667	0.00248698	0.197645	0.969822	0.453441	0.992006	32.25	31.12	34.44	30.3
P32234	GTP-binding protein 128up	39	161	11	368	protein metabolism;other metabolic processes	other cell component	other molecular function		128up	1.017	1.486	1.51	1.005	1.503	0.998656	0.991669	0.994562	0.995836	0.992006	4.51	11.53	12.49	18.88
P02574	Actin, larval muscle	94	6703	11	376	cell cycle OR cell proliferation	cytoskeleton;other cell component	other molecular function	Platelet degranulation ; RHOF GTPase cycle; RHOBTB2 GTPase cycle; Regulation of actin dynamics for phagocytic cup formation; VEGFA-VEGFR2 Pathway; RHO GTPases Activate WASPs and WAVEs; Clathrin-mediated endocytosis; Recycling pathway of L1; Interaction between L1 and Ankyrins; UCH proteinases; DNA Damage Recognition in GG-NER; EPHB-mediated forward signaling; EPH-ephrin mediated repulsion of cell…	Act79B	0.951	0.626	0.596	0.986	0.604	0.998656	0.858299	0.994562	0.994447	0.992006	11.03	13.8	11.1	2.41
Q9VBP9	Nuclear protein localization protein 4 homolog	23	140	11	652	protein metabolism;other metabolic processes;other biological processes	nucleus	other molecular function	Neddylation; KEAP1-NFE2L2 pathway; Translesion Synthesis by POLH	Npl4	1.11	1.259	1.398	0.926	1.51	0.998656	0.991669	0.994562	0.936959	0.992006	27.67	14.22	26.43	27.06
Q8SXC2	Cysteine-S-conjugate beta-lyase 2	37	192	11	450	other metabolic processes	mitochondrion;other cell component	other molecular function	Tryptophan catabolism; Phenylalanine metabolism; Glutamate and glutamine metabolism	Kyat	1.076	1	1.076	1.022	1.053	0.998656	0.991669	0.996106	0.996508	0.992006	10.8	6.18	40.22	7.56
Q7JV69	SD11922p	46	251	11	374	protein metabolism;other biological processes	non-structural extracellular	enzyme regulator activity;other molecular function	Neutrophil degranulation; COPII-mediated vesicle transport; Cargo concentration in the ER; Platelet degranulation ; Regulation of Insulin-like Growth Factor (IGF) transport and uptake by Insulin-like Growth Factor Binding Proteins (IGFBPs); Post-translational protein phosphorylation; Intrinsic Pathway of Fibrin Clot Formation; Glucocorticoid biosynthesis; Prednisone ADME	Spn55B	0.805	1.377	1.108	1.173	0.945	0.51124	0.991669	0.997675	0.758567	0.992006	33.23	33.34	9.99	18.48
Q24298	DE-cadherin	12	84	11	1507	cell adhesion;cell organization and biogenesis;stress response;developmental processes;other biological processes	plasma membrane;other membranes;other cytoplasmic organelle;other cell component	cytoskeletal activity;other molecular function		shg	1.061	1.011	1.073	0.858	1.25	0.998656	0.991669	0.994562	0.927844	0.999838	32.71	12.05	22.63	19.23
P23572	Cyclin-dependent kinase 1	43	130	11	297	cell cycle OR cell proliferation;cell organization and biogenesis;protein metabolism;other metabolic processes;stress response;developmental processes;signal transduction;other biological processes	nucleus;other cell component	kinase activity;other molecular function	Cdc20:Phospho-APC/C mediated degradation of Cyclin A; Nuclear Pore Complex (NPC) Disassembly; TP53 Regulates Transcription of Genes Involved in G2 Cell Cycle Arrest; Resolution of Sister Chromatid Cohesion; Regulation of PLK1 Activity at G2/M Transition; Cyclin A/B1/B2 associated events during G2/M transition; Transcriptional regulation by RUNX2; Chk1/Chk2(Cds1) mediated inactivation of Cyclin B:…	Cdk1	2.08	1.751	3.643	1.401	2.6	0.000159853	0.9471	0.224788	0.187745	0.582746	55.1	31.42	82.21	62.44
Q7JWR9	Zinc finger CCCH domain-containing protein 15 homolog	22	134	11	404	protein metabolism;other metabolic processes	cytosol	other molecular function			0.982	1.968	1.933	1.1	1.757	0.998656	0.794442	0.994562	0.953181	0.992006	17.27	9.81	17.6	16.95
Q9V3W2	Complex I-B17	54	292	11	167	other metabolic processes	other membranes;mitochondrion	other molecular function		ND-B17	0.745	0.721	0.537	0.96	0.559	0.186748	0.895346	0.807157	0.969803	0.886638	19.21	38.16	27.83	36.06
Q8T0D3	Dek, isoform B	23	111	11	669	cell organization and biogenesis;other biological processes	nucleus	nucleic acid binding activity;other molecular function	Transcriptional regulation by the AP-2 (TFAP2) family of transcription factors	Dek	0.986	1.11	1.094	0.852	1.284	0.998656	0.999685	0.996921	0.652561	0.992006	8.5	24.9	17.25	14.98
Q9VE01	Probable cytochrome P450 12a5, mitochondrial	30	162	11	536		other membranes;mitochondrion	other molecular function		Cyp12a5	0.953	1.105	1.053	1.018	1.035	0.998656	0.999685	0.994562	0.999436	0.992006	21.39	26.7	11.71	12.43
P07486	Glyceraldehyde-3-phosphate dehydrogenase 1	89	6282	11	332	other metabolic processes	cytosol;cytoskeleton	other molecular function	Gluconeogenesis; Glycolysis	Gapdh1	0.906	0.916	0.83	0.963	0.861	0.82781	0.991669	0.994562	0.963131	0.992006	12.44	16.28	14.12	9.1
Q9VHB8	2-oxoisovalerate dehydrogenase subunit alpha	36	156	11	439	other metabolic processes	mitochondrion	other molecular function	Glyoxylate metabolism and glycine degradation; Branched-chain amino acid catabolism	Dmel\CG8199	1.128	1.008	1.137	1.025	1.11	0.997731	0.991669	0.9983	0.994658	0.993959	12.88	6.78	22.22	19.94
P45889	Actin-related protein 1	39	232	11	376	transport;other biological processes	cytoskeleton;other cell component	other molecular function	COPI-mediated anterograde transport; Neutrophil degranulation; HSP90 chaperone cycle for steroid hormone receptors (SHR) in the presence of ligand; COPI-independent Golgi-to-ER retrograde traffic	Arp1	1.193	1.104	1.317	1.088	1.21	0.855004	0.996958	0.996701	0.945548	0.999391	16.21	10.39	16.91	11.65
P27864	Recombination repair protein 1	24	95	11	679	DNA metabolism;other metabolic processes;stress response	nucleus	nucleic acid binding activity;other molecular function	PCNA-Dependent Long Patch Base Excision Repair; Displacement of DNA glycosylase by APEX1	Rrp1	1.426	1.481	2.111	0.983	2.148	0.50258	0.991669	0.994562	0.994447	0.992006	35.46	21.7	37.53	12.59
Q9VEJ0	Peroxiredoxin 3	32	249	11	234	other metabolic processes;stress response;other biological processes	mitochondrion;other cell component	other molecular function	Detoxification of Reactive Oxygen Species	Prx3	0.972	0.967	0.94	1	0.941	0.998656	0.991669	0.994562	0.994447	0.992006	11.07	6.07	4.97	7.91
Q9W4K8	FI22513p1	14	72	11	939		mitochondrion;other cell component	other molecular function	Regulation of pyruvate dehydrogenase (PDH) complex	Dmel\CG3626	1.026	0.971	0.996	1.117	0.892	0.999628	0.991669	0.994562	0.931101	0.992006	8.62	9	10.16	10.02
Q9VTX5	ADP-ribosylation factor GTPase activating protein 1, isoform A	38	108	11	468	other biological processes	other membranes;ER/Golgi	enzyme regulator activity	COPI-mediated anterograde transport; COPI-dependent Golgi-to-ER retrograde traffic	ArfGAP1	0.929	1.647	1.53	0.732	2.091	0.978833	0.945683	0.994562	0.192604	0.968262	8.95	11.66	21.43	37.82
A1Z7F1	Maltase A6, isoform C	28	197	11	601	other metabolic processes		other molecular function		Mal-A6	0.616	1.194	0.736	1.125	0.654	0.00702015	0.999685	0.994562	0.897492	0.992006	29.7	38.73	20.28	15.96
Q9VFM9	Twinfilin	36	120	11	343	cell-cell signaling;cell organization and biogenesis;transport;developmental processes;other biological processes	plasma membrane;other membranes;cytoskeleton;other cell component	cytoskeletal activity	RHOBTB2 GTPase cycle	twf	1.303	1.041	1.356	1.115	1.216	0.750574	0.991669	0.994562	0.935462	0.993518	36.39	18.63	18.39	12.03
A0A0B4K6V8	Alpha-Esterase-5, isoform B	32	123	11	543			other molecular function		alpha-Est5	1.073	1.032	1.107	1.256	0.881	0.998656	0.991669	0.996106	0.451838	0.992006	16.28	9.39	19.53	8.99
O17445	60S ribosomal protein L15	42	260	11	204	protein metabolism;other metabolic processes	cytosol;translational apparatus	nucleic acid binding activity;other molecular function	Nonsense Mediated Decay (NMD) enhanced by the Exon Junction Complex (EJC); L13a-mediated translational silencing of Ceruloplasmin expression; Formation of a pool of free 40S subunits; Nonsense Mediated Decay (NMD) independent of the Exon Junction Complex (EJC); SRP-dependent cotranslational protein targeting to membrane; GTP hydrolysis and joining of the 60S ribosomal subunit	RpL15	0.809	1.661	1.345	0.983	1.368	0.261808	0.965462	0.994562	0.994447	0.992006	23.86	28.38	14.62	17.1
Q9GU68	Eukaryotic translation initiation factor 5A	53	582	11	159	protein metabolism;other metabolic processes;other biological processes	other cell component	translation activity;nucleic acid binding activity	Hypusine synthesis from eIF5A-lysine	eEF5	1.402	0.982	1.376	1.193	1.154	0.0342193	0.991669	0.994562	0.391667	0.996548	16.81	32.01	32.19	28.86
M9NE73	Calpain-B, isoform B	21	124	11	925	protein metabolism		other molecular function		CalpB	0.817	0.935	0.764	0.968	0.789	0.710338	0.991669	0.994562	0.994447	0.992006	19.95	20.17	20.72	18.96
G7H829	Crinkled, isoform C	8	66	11	2167	developmental processes;other biological processes	cytoskeleton;other cell component	cytoskeletal activity;other molecular function		ck	0.728	1.052	0.766	0.792	0.967	0.429693	0.991669	0.994562	0.700735	0.992006	24.48	38.7	27.05	40.55
Q9VN86	AT14148p	36	240	11	430	other metabolic processes	other membranes;other cell component	other molecular function	Platelet degranulation	Sccpdh1	0.897	1.229	1.103	1.03	1.071	0.885572	0.995874	0.996106	0.994447	0.992006	11.87	7.86	9.59	12.19
E2QCY9	Synapsin, isoform D	15	180	11	1041	cell-cell signaling;transport	ER/Golgi	other molecular function		Syn	1.023	0.674	0.69	1.027	0.672	0.999628	0.844219	0.978471	0.994447	0.992006	16.97	28.29	12.37	21.23
A1ZBW0	Heterogeneous nuclear ribonucleoprotein K, isoform C	32	195	11	502	other biological processes	nucleus;other cell component	nucleic acid binding activity;other molecular function	mRNA Splicing - Major Pathway; Processing of Capped Intron-Containing Pre-mRNA; SUMOylation of RNA binding proteins	HnRNP-K	1.236	1.707	2.11	1.102	1.916	0.72286	0.928093	0.964289	0.957957	0.992006	21.62	24.81	38.33	27.4
Q9VSL9	Butyryl-CoA dehydrogenase	31	133	11	420	other metabolic processes	mitochondrion	other molecular function	Branched-chain amino acid catabolism	Dmel\CG6638	0.938	1.131	1.061	1.198	0.886	0.983502	0.999685	0.994562	0.598108	0.992006	18.88	4.08	13.65	11.39
Q9V426	LD07162p	31	165	11	490	cell organization and biogenesis;other biological processes	nucleus;other cell component	nucleic acid binding activity		vig	0.893	1.016	0.908	0.996	0.912	0.851083	0.991669	0.994562	0.994447	0.992006	15.19	16.92	26.27	6.67
Q9W332	Cubilin homolog	5	32	11	3750	transport;other biological processes	plasma membrane;other membranes;other cell component	other molecular function		Cubn	2.047	0.953	1.951	0.911	2.141	0.00266671	0.991669	0.994562	0.942711	0.992006	65.17	33.09	33.21	35.14
Q9W451	Female sterile (1) M3	8	71	11	1836	cell organization and biogenesis;developmental processes;signal transduction;other biological processes	non-structural extracellular;plasma membrane;other membranes;other cell component	other molecular function		fs(1)M3	1.313	1.964	2.579	1.068	2.414	0.77453	0.901875	0.951763	0.994447	0.968262	37.57	29.64	35.95	29.73
Q95RE4	LD37574p	37	183	11	352	RNA metabolism OR transcription;other metabolic processes;other biological processes	nucleus;other cell component	nucleic acid binding activity	mRNA Splicing - Major Pathway; Processing of Capped Intron-Containing Pre-mRNA; mRNA Splicing - Minor Pathway	yps	1.111	1.581	1.757	0.91	1.932	0.937133	0.988593	0.994562	0.843866	0.992006	20.69	16.95	23.35	22.31
Q9VES6	Fatty acyl-CoA reductase	33	116	11	499	other metabolic processes	other membranes;other cytoplasmic organelle;other cell component	other molecular function		Dmel\CG17560	1.079	0.98	1.057	0.862	1.227	0.998656	0.991669	0.994562	0.783626	0.993156	13.01	11.87	16.37	17.64
M9PBZ9	eIF-4F 25 kDa subunit	50	346	11	259	protein metabolism;other metabolic processes	other cell component	nucleic acid binding activity		eIF4E1	1.41	1.489	2.099	0.948	2.213	0.0334871	0.991669	0.994562	0.939467	0.968262	25.45	24.24	29.42	27.96
E4NKJ3	GH04081p	59	990	11	260		cytoskeleton			wupA	0.765	0.992	0.759	1.055	0.719	0.10059	0.991669	0.994562	0.979356	0.992006	23.68	27.31	22.41	17.32
Q9VBS7	Uncharacterized protein, isoform B	28	130	11	425		other membranes	other molecular function		Dmel\CG10550	1.093	0.853	0.932	1.046	0.891	0.998656	0.988593	0.994562	0.994447	0.992006	15.15	11.42	13.96	16.96
Q9W1X4	Nuclear pore complex protein Nup214	9	121	11	1711	transport;other biological processes	other membranes;nucleus	other molecular function	Transport of the SLBP independent Mature mRNA; Transport of the SLBP Dependant Mature mRNA; Transport of Mature mRNA Derived from an Intronless Transcript; Transport of Mature mRNA derived from an Intron-Containing Transcript; Nuclear Pore Complex (NPC) Disassembly; Regulation of HSF1-mediated heat shock response; SUMOylation of SUMOylation proteins; SUMOylation of chromatin organization proteins…	Nup214	1.233	1.631	2.011	1.525	1.319	0.736634	0.946966	0.969822	0.0224447	0.992006	15.48	25.63	36.05	30.61
P26019	DNA polymerase alpha catalytic subunit	10	41	11	1488	cell cycle OR cell proliferation;DNA metabolism;other metabolic processes;stress response	nucleus	nucleic acid binding activity;other molecular function	Activation of the pre-replicative complex; Polymerase switching; Removal of the Flap Intermediate; Inhibition of replication initiation of damaged DNA by RB1/E2F1; DNA replication initiation	PolA1	1.347	1.418	1.911	1.385	1.379	0.627719	0.991669	0.994562	0.533095	0.992006	61.97	120.3	46.5	65.83
P36872	Protein phosphatase PP2A 55 kDa regulatory subunit	29	188	11	499	cell cycle OR cell proliferation;cell organization and biogenesis;protein metabolism;other metabolic processes;developmental processes;other biological processes	cytosol;nucleus;other cell component	enzyme regulator activity	Nonsense Mediated Decay (NMD) enhanced by the Exon Junction Complex (EJC); Cyclin A/B1/B2 associated events during G2/M transition; Phosphorylation of CI; Phosphorylation of SMO; Ubiquitination and proteolysis of phosphorylated CI; Ubiquitination and degradation of phosphorylated ARM; Dephosphorylation of PER; Phosphorylation of AXN and APC; Phosphorylation of ARM; Recruitment of the 'destruction…	tws	1.438	1.488	2.14	1.145	1.869	0.190317	0.991669	0.964289	0.824468	0.992006	34.84	30.72	18.72	13.08
Q7K860	FI07231p	59	601	11	153	other biological processes		enzyme regulator activity;other molecular function		TpnC4	1.056	0.739	0.78	1.047	0.745	0.998656	0.950348	0.994562	0.99246	0.992006	18.24	16.05	17.21	10.89
M9PH99	Glutamic acid decarboxylase 1, isoform D	30	183	11	510	other metabolic processes		other molecular function		Gad1	0.842	0.813	0.684	0.921	0.744	0.697744	0.946456	0.994562	0.910312	0.992006	17.4	20.48	18.35	11.44
Q9VUH8	Tudor domain-containing protein 3	19	49	11	836	cell organization and biogenesis;RNA metabolism OR transcription;other metabolic processes	nucleus;other cell component	nucleic acid binding activity		Tdrd3	1.808	1.319	2.385	0.785	3.037	0.261213	0.991669	0.994562	0.927844	0.869351	49.85	47.42	29.11	55.1
Q9VZL3	Very-long-chain enoyl-CoA reductase	30	243	11	302	other metabolic processes	other membranes;ER/Golgi	other molecular function	Synthesis of very long-chain fatty acyl-CoAs	Sc2	0.893	1.497	1.336	0.952	1.403	0.741576	0.991669	0.994562	0.938126	0.992006	8.87	6.87	6.35	5.82
Q9VH81	Protein-serine/threonine phosphatase	26	148	11	520	cell cycle OR cell proliferation;protein metabolism;other metabolic processes	nucleus;other cell component	other molecular function	Negative regulation of MAPK pathway; ESR-mediated signaling	PpD3	1.239	1.784	2.21	1.396	1.583	0.749526	0.861164	0.951763	0.0699151	0.992006	33.77	19.22	35.72	32.58
M9PBV2	NTPase, isoform F	26	165	11	524	other metabolic processes	other membranes;other cell component	other molecular function	Phosphate bond hydrolysis by NTPDase proteins	NTPase	0.805	1.144	0.922	1.059	0.87	0.331215	0.999685	0.994562	0.975111	0.992006	19.7	13.48	10.54	12.48
Q7K3Z3	NSFL1 cofactor p47	38	125	11	407	cell organization and biogenesis;protein metabolism;other metabolic processes;developmental processes	cytosol;ER/Golgi	other molecular function	RHOH GTPase cycle	p47	2.048	0.716	1.467	0.96	1.528	0.000170104	0.890018	0.994562	0.985962	0.992006	52.64	41.28	45.11	31.74
M9PDQ9	Uncharacterized protein, isoform D	26	158	11	416			other molecular function		Dmel\CG31974	0.847	0.741	0.628	1.3	0.483	0.713187	0.888938	0.964289	0.152873	0.582746	19.46	14.47	9.83	8.52
Q9W229	40S ribosomal protein S24	53	533	11	131	protein metabolism;other metabolic processes	cytosol;translational apparatus	other molecular function	L13a-mediated translational silencing of Ceruloplasmin expression; Translation initiation complex formation; Formation of a pool of free 40S subunits; Formation of the ternary complex, and subsequently, the 43S complex; Ribosomal scanning and start codon recognition; Nonsense Mediated Decay (NMD) enhanced by the Exon Junction Complex (EJC); Major pathway of rRNA processing in the nucleolus and cy…	RpS24	1.018	2.064	2.101	1.17	1.796	0.999628	0.827892	0.994562	0.526061	0.992006	21.63	18.19	14.65	14.87
Q7JRH5	RE28271p	20	77	11	766	other biological processes	cytosol	nucleic acid binding activity		Dmel\CG5726	1.877	2.412	4.528	1.936	2.338	0.0239822	0.64864	0.240861	0.0139515	0.983761	51.27	38.94	67.95	47.19
Q9V595	Uroporphyrinogen decarboxylase	38	93	11	356	other metabolic processes	cytosol	other molecular function	Heme biosynthesis	Urod	1.09	1.167	1.271	1.04	1.222	0.998656	0.999685	0.996106	0.994447	0.992762	9.75	81.29	35.08	35.64
Q9VLL5	LP03571p	18	129	11	778	other metabolic processes		other molecular function	HS-GAG degradation	ESTS:172F5T	1.261	2.08	2.623	1.277	2.054	0.655129	0.747044	0.723944	0.4487	0.968262	19.89	13.44	21.99	15.3
Q9V7D2	V-type proton ATPase subunit D 1	61	457	11	246	transport	plasma membrane;other membranes;other cytoplasmic organelle	transporter activity	Neutrophil degranulation; ROS and RNS production in phagocytes; Insulin receptor recycling; Transferrin endocytosis and recycling; Amino acids regulate mTORC1; Ion channel transport	Vha36-1	1.013	1.161	1.176	1.204	0.977	0.999628	0.999685	0.997675	0.332816	0.992006	10.63	12.99	10.45	9.5
Q9VL89	Methionine aminopeptidase 2	31	269	11	448	protein metabolism;other metabolic processes	other cell component	other molecular function	Inactivation, recovery and regulation of the phototransduction cascade	und	1.104	1.981	2.187	0.986	2.219	0.950637	0.875397	0.994562	0.994447	0.968262	5.37	15.51	23.29	19.61
Q9VU35	RH34413p	83	470	11	103	other biological processes	mitochondrion	other molecular function		Dmel\CG11267	1.046	1.246	1.304	1.059	1.231	0.998656	0.991669	0.996106	0.969803	0.992006	11.44	7.2	13.69	6.73
Q8MST5	Tubulin beta chain	53	2335	11	457	cell cycle OR cell proliferation;cell organization and biogenesis	cytoskeleton;other cell component	cytoskeletal activity;other molecular function	COPI-dependent Golgi-to-ER retrograde traffic; Kinesins; COPI-mediated anterograde transport; HSP90 chaperone cycle for steroid hormone receptors (SHR) in the presence of ligand; COPI-independent Golgi-to-ER retrograde traffic	betaTub97EF	0.995	0.884	0.88	1.158	0.76	0.998656	0.991669	0.994562	0.592389	0.992006	13.16	11.08	11.49	9.11
Q9VGR7	J domain-containing protein CG6693	43	81	11	299		nucleus;other cell component	other molecular function			1.663	2.077	3.454	1.438	2.402	0.119283	0.884188	0.626774	0.410639	0.968262	56.14	39.44	58.12	49.73
Q9VGW7	Arginine methyltransferase 1	46	257	11	376	protein metabolism;RNA metabolism OR transcription;other metabolic processes;other biological processes	nucleus	other molecular function	RUNX1 regulates genes involved in megakaryocyte differentiation and platelet function; Extra-nuclear estrogen signaling; Estrogen-dependent gene expression	Art1	1.602	1.252	2.005	1.095	1.831	0.0693581	0.991669	0.994562	0.939976	0.992006	45.81	13.51	31.78	31.68
Q9VXK0	Protein NipSnap	50	313	11	273	cell organization and biogenesis;other metabolic processes	other membranes;mitochondrion		RHOH GTPase cycle	Nipsnap	0.946	1.263	1.195	1.038	1.151	0.986078	0.991669	0.999991	0.994447	0.999838	12.56	10.42	11.16	14.76
X2JC35	60S ribosomal protein L36	36	264	11	115	protein metabolism;other metabolic processes	translational apparatus;other cell component	other molecular function		RpL36	0.907	1.817	1.649	1.017	1.621	0.833939	0.914961	0.994562	0.996612	0.992006	15.71	5.73	17.92	12.06
Q9VDT1	Arc42	32	166	11	405	other metabolic processes	mitochondrion	other molecular function	Beta oxidation of hexanoyl-CoA to butanoyl-CoA; Beta oxidation of butanoyl-CoA to acetyl-CoA	Arc42	1.144	0.999	1.143	0.978	1.169	0.983502	0.991669	0.997675	0.994447	0.999391	15.69	23.01	13.27	11.45
Q7K8Y3	IP16419p	37	137	11	392	other biological processes	non-structural extracellular	enzyme regulator activity		Spn42Da	0.909	1.211	1.101	1.029	1.069	0.931214	0.991669	0.997675	0.994447	0.993518	10.16	7.71	6.97	4.87
Q7K084	Odorant-binding protein 44a, isoform A	48	219	11	143	other biological processes		other molecular function		Obp44a	0.976	0.893	0.871	0.712	1.225	0.998656	0.991669	0.994562	0.0121576	0.9991	14.84	6.83	10.82	14.3
Q9VWE7	LD26789p	13	50	11	1241	transport	nucleus;other cell component	nucleic acid binding activity;other molecular function		Ranbp21	1.098	1.144	1.256	0.962	1.305	0.998656	0.999685	0.9983	0.994447	0.993518	31.49	26.63	41.29	30.68
Q9VBX1	Nuclear export mediator factor NEMF homolog	17	135	11	992	protein metabolism;other metabolic processes;transport;other biological processes	other membranes;mitochondrion;nucleus;other cell component	translation activity;nucleic acid binding activity		Clbn	1.04	1.904	1.981	1.087	1.822	0.999628	0.888956	0.994562	0.969803	0.992006	15.97	17.81	41.46	21.29
Q9W4P5	V-type proton ATPase subunit d 1	46	149	11	350	transport;developmental processes;other biological processes	plasma membrane;other membranes;other cytoplasmic organelle	transporter activity	ROS and RNS production in phagocytes; Insulin receptor recycling; Transferrin endocytosis and recycling; Amino acids regulate mTORC1; Ion channel transport	VhaAC39-1	1.02	0.817	0.833	0.945	0.882	0.998656	0.973991	0.994562	0.946691	0.992006	19	13.8	14.03	16.09
Q7YTY6	Serine protease inhibitor 42Dd	40	122	11	372	other biological processes		enzyme regulator activity	Neutrophil degranulation; COPII-mediated vesicle transport; Cargo concentration in the ER; Platelet degranulation ; Regulation of Insulin-like Growth Factor (IGF) transport and uptake by Insulin-like Growth Factor Binding Proteins (IGFBPs); Post-translational protein phosphorylation; Intrinsic Pathway of Fibrin Clot Formation; Glucocorticoid biosynthesis; Prednisone ADME	Spn42Dd	0.998	0.675	0.674	1.026	0.657	0.998656	0.877668	0.964289	0.994447	0.992006	13.35	14.5	25.59	18.87
Q9V9Q4	LD43819p	39	166	11	354	other biological processes	cytosol	other molecular function		Dmel\CG1416	1.106	1.269	1.404	1.007	1.394	0.981583	0.991669	0.994562	0.99875	0.992006	11.31	10.72	16.78	19.11
A0A0B4LFL3	Eukaryotic translation elongation factor 1 beta, isoform C	56	427	11	222	protein metabolism;other metabolic processes	other cell component	nucleic acid binding activity		eEF1beta	1.239	1.328	1.646	1.202	1.37	0.371828	0.991669	0.994562	0.341857	0.992006	27.9	19.25	24.92	23.32
Q9VBY8	Protein unc-13 homolog 4B	13	58	11	1153	cell-cell signaling;cell organization and biogenesis;transport;developmental processes	cytoskeleton;ER/Golgi;other cytoplasmic organelle;other cell component	other molecular function	Neutrophil degranulation	stac	1.196	0.861	1.029	0.939	1.096	0.954286	0.973991	0.994562	0.983413	0.992006	19.45	12.89	15.88	14.86
A1Z9A8	Protein PTCD3 homolog, mitochondrial	24	146	11	652	protein metabolism;other metabolic processes;other biological processes	translational apparatus;other cell component	translation activity;nucleic acid binding activity	Mitochondrial translation elongation; Mitochondrial translation termination		1.187	1.381	1.64	0.899	1.825	0.894239	0.991669	0.994562	0.888685	0.992006	12.88	10.57	18	18.74
A0A0B4K8A5	Mahjong, isoform B	9	47	11	1544	protein metabolism;other metabolic processes	nucleus			mahj	0.961	1.348	1.295	0.931	1.391	0.998656	0.991669	0.997675	0.984789	0.992006	19.44	23.48	17.56	38.9
Q9VPR5	Splicing factor 3b subunit 1, isoform A	12	94	11	1340	cell organization and biogenesis;RNA metabolism OR transcription;other metabolic processes	nucleus	nucleic acid binding activity	mRNA Splicing - Major Pathway; mRNA Splicing - Minor Pathway	Sf3b1	1.041	1.557	1.621	0.818	1.982	0.999628	0.988593	0.994562	0.773161	0.992006	24.86	10.17	13.96	26.19
Q9VTB0	LD35289p	35	121	11	407			other molecular function		Dmel\CG8003	0.998	1.806	1.802	0.993	1.814	0.998656	0.809239	0.994562	0.994447	0.992006	11.6	22.53	28.16	17.49
Q9W3H4	LD36273p	62	137	10	247	other metabolic processes		other molecular function		sni	1.386	0.716	0.993	0.803	1.236	0.310101	0.869247	0.994562	0.290908	0.992006	22.96	42.59	25.19	25.96
Q8IN44	Protein Turandot A	62	143	10	129	stress response;other biological processes	non-structural extracellular			TotA	1.419	0.493	0.7	0.764	0.917	0.274567	0.26648	0.964289	0.0689196	0.992006	33.64	29.57	75.8	44.77
Q9VCH8	LD23303p	11	50	10	1197	RNA metabolism OR transcription;other metabolic processes	nucleus;other cell component	nucleic acid binding activity;other molecular function	mRNA decay by 3' to 5' exoribonuclease	tst	1.051	3.014	3.167	1.038	3.051	0.998656	0.39705	0.739529	0.994447	0.601822	31.42	46.23	42.05	35.1
Q9VT38	GH03795p	29	130	10	374	RNA metabolism OR transcription;other metabolic processes	nucleus;other cell component	nucleic acid binding activity		Dmel\CG18178	1.058	1.728	1.827	1.017	1.796	0.998656	0.914961	0.994562	0.999871	0.992006	35.94	19.12	10.01	12.76
A0A0B4LGI1	G protein alpha s subunit, isoform E	39	178	10	382	signal transduction		other molecular function		Galphas	1.097	0.677	0.743	0.898	0.827	0.998656	0.872487	0.994562	0.912885	0.992006	17.06	12.57	7.16	4.76
Q7K3S2	GH13262p	32	125	10	409	stress response	nucleus	nucleic acid binding activity;other molecular function		Nt5c	1.13	0.799	0.903	1.031	0.875	0.998656	0.967113	0.994562	0.994447	0.992006	26.25	20.91	13.27	7.04
Q9VIS3	Fructose-bisphosphatase	37	474	10	334	other metabolic processes	cytosol;other cell component	other molecular function		fbp	0.858	0.9	0.772	1.057	0.731	0.555731	0.991669	0.994562	0.975111	0.992006	4.55	10.53	5.26	11.89
Q9VWI0	NADH dehydrogenase [ubiquinone] iron-sulfur protein 4, mitochondrial	44	215	10	183	cell organization and biogenesis;other metabolic processes	other membranes;mitochondrion		Complex I biogenesis	ND-18	1.148	0.835	0.959	1.086	0.882	0.884451	0.988593	0.994562	0.931101	0.992006	20.08	21.23	23.59	16.68
P22769	Proteasome subunit alpha type-7-1	51	293	10	249	protein metabolism;other metabolic processes	cytosol;nucleus;other cell component		Antigen processing: Ubiquitination & Proteasome degradation; Neddylation; Regulation of RAS by GAPs; ABC-family proteins mediated transport; Degradation of beta-catenin by the destruction complex; Ub-specific processing proteases; Activation of NF-kappaB in B cells; Oxygen-dependent proline hydroxylation of Hypoxia-inducible Factor Alpha; Cross-presentation of soluble exogenous antigens (endosome…	Prosalpha4	0.931	1.507	1.404	0.881	1.593	0.954286	0.991669	0.994562	0.74326	0.992006	15.31	20.39	27.43	20.54
P26686	Serine-arginine protein 55	25	208	10	376	cell cycle OR cell proliferation;RNA metabolism OR transcription;other metabolic processes;stress response;signal transduction;other biological processes	nucleus;other cell component	nucleic acid binding activity		B52	0.965	1.465	1.414	1.137	1.243	0.998656	0.991669	0.994562	0.816432	0.993518	9.22	3.74	30.14	16.15
Q9VHS2	Cytochrome c oxidase subunit 7A, mitochondrial	71	125	10	89	cell organization and biogenesis;other metabolic processes;other biological processes	other membranes;mitochondrion	other molecular function	Cytoprotection by HMOX1; TP53 Regulates Metabolic Genes; Respiratory electron transport	COX7A	1.003	0.918	0.921	0.889	1.036	0.998656	0.991669	0.994562	0.626959	0.992006	14.57	28.61	19.49	24.11
P48375	Peptidyl-prolyl cis-trans isomerase Fkbp12	78	346	10	108	protein metabolism;other metabolic processes;other biological processes	cytosol;other cell component	signal transduction activity or receptor binding;other molecular function	TGF-beta receptor signaling activates SMADs; mTORC1-mediated signalling; Calcineurin activates NFAT	Fkbp12	1.105	1.346	1.487	1.008	1.476	0.948212	0.991669	0.994562	0.99592	0.992006	16.76	12.3	14.13	12.29
C9QPE7	Trehalose 6-phosphate phosphatase	37	199	10	296	other metabolic processes		other molecular function		CG5171-RC	0.885	0.914	0.809	0.989	0.818	0.833537	0.991669	0.994562	0.994447	0.992006	26.56	18.64	8.41	12.58
Q7K1M4	SD04017p	41	159	10	312	cell organization and biogenesis;transport	other cytoplasmic organelle	transporter activity;other molecular function	Vitamin E	Dmel\CG1902	0.787	0.954	0.751	0.976	0.769	0.38741	0.991669	0.994562	0.994447	0.992006	39.24	16.92	7.88	7.81
E1UIK3	CG8768 protein	43	100	10	302					CG8768	2.203	0.542	1.194	1.84	0.649	0.000228031	0.581788	0.9983	9.33607e-06	0.992006	34.83	21.52	21.66	33.95
Q7YU24	Transmembrane GTPase Marf	17	106	10	810	cell organization and biogenesis;other metabolic processes;stress response;transport;developmental processes;other biological processes	other membranes;mitochondrion;other cell component	other molecular function	Factors involved in megakaryocyte development and platelet production; PINK1-PRKN Mediated Mitophagy; RHOT2 GTPase cycle	Marf	1.071	0.655	0.702	0.792	0.886	0.998656	0.758677	0.994562	0.241276	0.992006	22.19	7.29	25.27	14.12
O02373	UDP-glucose 6-dehydrogenase	25	85	10	476	cell-cell signaling;protein metabolism;other metabolic processes;developmental processes;signal transduction	cytosol;nucleus	other molecular function	Formation of the active cofactor, UDP-glucuronate	sgl	1.096	0.938	1.028	1.069	0.962	0.998656	0.991669	0.994562	0.987913	0.992006	10.86	14.77	23.11	18.91
Q961E7	Phosphorylase kinase	32	106	10	419	cell cycle OR cell proliferation;protein metabolism;other metabolic processes;stress response;developmental processes;signal transduction	nucleus;other cell component	kinase activity;other molecular function		PhKgamma	0.736	0.758	0.559	1.09	0.512	0.311076	0.909462	0.815555	0.939976	0.613814	17.68	32.23	19.94	8.27
Q2PDR9	Varicose, isoform C	24	91	10	469	cell organization and biogenesis;developmental processes	plasma membrane;other membranes;other cell component			vari	0.848	0.951	0.806	0.981	0.822	0.835822	0.991669	0.994562	0.994447	0.992006	20.42	28.91	14.58	17.83
Q27237	Protein tumorous imaginal discs, mitochondrial	29	107	10	520	cell organization and biogenesis;stress response;other biological processes	other membranes;cytosol;mitochondrion	signal transduction activity or receptor binding;other molecular function		l(2)tid	0.938	1.254	1.177	0.925	1.273	0.998656	0.991669	0.999991	0.939467	0.992006	20.53	17.01	16.83	18.57
A1Z7P1	Phosphoglucomutase 2a	23	135	10	623	other metabolic processes		other molecular function	Neutrophil degranulation; Glycolysis; Pentose phosphate pathway	Pgm2a	0.747	1.352	1.01	0.915	1.104	0.238191	0.991669	0.994562	0.911633	0.999203	30.94	35.7	26.1	24.88
Q9VMV5	Viking, isoform A	6	220	10	1940	cell organization and biogenesis;developmental processes;other biological processes	non-structural extracellular;extracellular matrix;other membranes	extracellular structural activity	Collagen biosynthesis and modifying enzymes	vkg	0.629	0.83	0.522	0.883	0.591	0.000749719	0.991669	0.898579	0.576874	0.992006	48.64	30.63	36.01	22.76
Q7JQN4	RNA helicase	15	115	10	782		nucleus	nucleic acid binding activity;other molecular function		Rs1	0.722	1.798	1.298	1.005	1.291	0.274567	0.94006	0.996106	0.994447	0.992006	31.6	29.62	16.85	17.51
Q494K2	WD repeat-containing protein 55 homolog	16	38	10	895	cell cycle OR cell proliferation;DNA metabolism;other metabolic processes;stress response;developmental processes	nucleus	other molecular function		Ctf4	1.42	1.411	2.004	0.715	2.804	0.39359	0.991669	0.994562	0.283437	0.641722	30.81	19.36	22.17	26.8
Q86BI3	Zinc-finger protein at 72D, isoform B	16	133	10	884	RNA metabolism OR transcription;other metabolic processes		nucleic acid binding activity;other molecular function		Zn72D	1.152	0.941	1.084	0.951	1.14	0.978165	0.991669	0.996106	0.961415	0.997929	30.07	10.04	23.93	17.49
B7Z0D3	BCL2-associated athanogene 6	16	98	10	1346	cell organization and biogenesis;protein metabolism;other metabolic processes;stress response;other biological processes	non-structural extracellular;cytosol;nucleus	other molecular function		clone 2.45	0.959	1.682	1.612	1.053	1.532	0.998656	0.973991	0.994562	0.994447	0.992006	22.87	17.01	35.94	26.4
A8E702	39S ribosomal protein L28, mitochondrial	38	120	10	302		translational apparatus;other cell component	other molecular function		mRpL28	1.405	0.557	0.783	1.011	0.775	0.247691	0.533891	0.994562	0.999436	0.992006	21.12	21.71	29.95	32.78
Q9VXB0	NECAP-like protein CG9132	48	121	10	246	transport	plasma membrane;other membranes		Cargo recognition for clathrin-mediated endocytosis; Golgi Associated Vesicle Biogenesis		0.949	1.261	1.197	0.937	1.278	0.998656	0.991669	0.999991	0.936959	0.992006	7.82	8.13	3.41	4.36
Q9VXY3	Dihydrolipoamide acetyltransferase component of pyruvate dehydrogenase complex	31	115	10	462	other metabolic processes	mitochondrion;other cell component	other molecular function	RHOH GTPase cycle; Glyoxylate metabolism and glycine degradation; Branched-chain amino acid catabolism	Dbct	1.214	1.181	1.433	0.936	1.531	0.807122	0.997109	0.994562	0.959992	0.992006	5.44	10.5	23.25	16.82
Q9VRS6	Jonah 65Aiv	68	250	10	271	protein metabolism		other molecular function		Jon65Aiv	0.594	1.232	0.732	0.985	0.743	0.000460936	0.99616	0.994562	0.994447	0.992006	46.73	23.24	31.67	15.18
P40304	Proteasome subunit beta type-1	62	406	10	235	protein metabolism;other metabolic processes	cytosol;nucleus;other cell component		Ubiquitination and proteolysis of phosphorylated CI; Degradation of NF-kappa-B inhibitor, CACT; Ubiquitination and degradation of phosphorylated ARM; Nuclear CI is degraded; Degradation of TIM; Degradation of PER; Degradation of CRY	Prosbeta6	1.331	1.1	1.464	0.891	1.642	0.18677	0.997486	0.994562	0.754086	0.992006	26.34	32.64	32.14	31.12
A0A0B4LGX1	Uncharacterized protein, isoform P	33	237	10	365		other cell component			BcDNA:RE18604	0.955	1.478	1.411	0.996	1.417	0.998656	0.991669	0.994562	0.994447	0.992006	7.09	7.76	10.82	7.78
Q9VA18	Coiled-coil-helix-coiled-coil-helix domain containing 3	53	219	10	223	cell organization and biogenesis	other membranes;mitochondrion			Chchd3	0.957	0.888	0.849	0.959	0.885	0.998656	0.991669	0.994562	0.955309	0.992006	7.52	5.84	10.38	4.45
Q9V431	Apoptosis inhibitor 5 homolog	32	135	10	536	other biological processes	nucleus			cass	1.171	0.998	1.169	0.778	1.502	0.954286	0.991669	0.997675	0.346689	0.992006	22.06	20.14	27.89	13.38
Q9W1C9	Ejaculatory bulb-specific protein 3	55	354	10	126	developmental processes;other biological processes	non-structural extracellular			EbpIII	0.777	1.168	0.908	1.01	0.899	0.135608	0.999685	0.994562	0.999436	0.992006	46.49	53.36	7.88	8.83
Q9W2U4	Serine/threonine-protein phosphatase 4 regulatory subunit 2	24	105	10	609	cell cycle OR cell proliferation;other biological processes	nucleus;other cell component	enzyme regulator activity		PPP4R2r	1.604	1.563	2.508	0.989	2.536	0.233526	0.991669	0.953431	0.994447	0.929636	56.15	39.79	60.25	36.02
Q9W2E7	Protein Rae1	30	130	10	346	cell cycle OR cell proliferation;cell organization and biogenesis;transport;signal transduction;other biological processes	cytoskeleton;nucleus;other cell component	nucleic acid binding activity;other molecular function	Transport of the SLBP independent Mature mRNA; Transport of the SLBP Dependant Mature mRNA; Transport of Mature mRNA Derived from an Intronless Transcript; Transport of Mature mRNA derived from an Intron-Containing Transcript; Nuclear Pore Complex (NPC) Disassembly; Regulation of HSF1-mediated heat shock response; SUMOylation of SUMOylation proteins; SUMOylation of chromatin organization proteins…	Rae1	1.377	1.246	1.715	0.867	1.978	0.368565	0.991669	0.994562	0.79624	0.983761	26.74	24.95	24.63	23.65
Q9VZJ8	RH40737p	24	118	10	548	other metabolic processes	other cell component	kinase activity		Dmel\CG11594	0.947	1.103	1.044	0.871	1.198	0.998656	0.999685	0.994562	0.753484	0.993518	11.89	14.57	14.35	18.89
Q9VXP3	GH05406p	29	105	10	557	protein metabolism;other metabolic processes	other membranes;mitochondrion;translational apparatus	other molecular function	Mitochondrial translation elongation; Mitochondrial translation termination	mRpS30	0.816	1.396	1.138	1.024	1.111	0.412384	0.991669	0.996106	0.994447	0.993518	15.83	33.23	17.94	15.83
B7Z0B3	Uncharacterized protein, isoform G	41	160	10	459	signal transduction	non-structural extracellular;extracellular matrix;other membranes	signal transduction activity or receptor binding;other molecular function		AAF47782	1.048	0.771	0.807	0.924	0.873	0.998656	0.927026	0.994562	0.931101	0.992006	60.53	14.41	12.13	9.85
A1Z729	Uncharacterized protein	41	140	10	330	cell organization and biogenesis;other metabolic processes;other biological processes	other membranes;ER/Golgi	other molecular function	RA biosynthesis pathway; The canonical retinoid cycle in rods (twilight vision); Retinoid metabolism and transport	Rdh1	0.96	1.112	1.067	0.9	1.185	0.998656	0.997109	0.996106	0.831281	0.999838	22.73	11.73	30.89	18.41
A0A6F7SG83	Phosphatidylinositol 4-kinase type 2	25	93	10	480	cell organization and biogenesis;other metabolic processes	plasma membrane;other membranes;ER/Golgi;other cytoplasmic organelle	kinase activity;other molecular function		Pi4KIIalpha	1.015	0.743	0.755	0.933	0.809	0.998656	0.888938	0.994562	0.93159	0.992006	31.37	25.73	32.55	37.75
C7LA93	Dorsal, isoform F	13	148	10	999	RNA metabolism OR transcription;developmental processes;other biological processes	other cell component	nucleic acid binding activity;other molecular function		dl	1.108	0.894	0.991	0.989	1.002	0.998656	0.991669	0.994562	0.994447	0.992006	12.94	17.34	24.01	9.85
P46222	60S ribosomal protein L11	50	355	10	184	protein metabolism;other metabolic processes	cytosol;translational apparatus;nucleus;other cell component	nucleic acid binding activity;other molecular function	Nonsense Mediated Decay (NMD) enhanced by the Exon Junction Complex (EJC); L13a-mediated translational silencing of Ceruloplasmin expression; Formation of a pool of free 40S subunits; Nonsense Mediated Decay (NMD) independent of the Exon Junction Complex (EJC); SRP-dependent cotranslational protein targeting to membrane; GTP hydrolysis and joining of the 60S ribosomal subunit	RpL11	1.12	1.566	1.754	0.898	1.953	0.900251	0.988593	0.994562	0.694162	0.992006	7.31	13.95	15.97	14.14
Q9VWP2	RH57257p	58	178	10	242	other metabolic processes		other molecular function	Formation of xylulose-5-phosphate	Dmel\CG7322	0.937	1.258	1.178	1.019	1.156	0.954286	0.991669	0.997675	0.994447	0.999838	11.86	13.43	7.66	6.16
E2QCN3	Alpha/beta hydrolase 1, isoform B	30	98	10	438	other metabolic processes	other membranes	other molecular function		Hydr1	0.597	1.002	0.598	0.906	0.66	0.0493215	0.991669	0.951763	0.931101	0.992006	23.79	31.76	10.74	10.7
Q95083	Proteasome subunit alpha type-5	44	292	10	244	protein metabolism;other metabolic processes;other biological processes	cytosol;nucleus;other cell component		Cdc20:Phospho-APC/C mediated degradation of Cyclin A; UCH proteinases; Ub-specific processing proteases; RUNX1 regulates transcription of genes involved in differentiation of HSCs; Neutrophil degranulation; ABC-family proteins mediated transport; Antigen processing: Ubiquitination & Proteasome degradation; Neddylation; Regulation of RAS by GAPs; Degradation of beta-catenin by the destruction comp…	Prosalpha5	1.624	1.026	1.666	1.049	1.588	0.0269162	0.991669	0.994562	0.994447	0.992006	45.78	28.41	29.93	34.37
Q9VK00	Uncharacterized protein, isoform A	32	147	10	341					Dmel\CG16826	0.764	1.508	1.151	1.288	0.894	0.283843	0.988593	0.997675	0.253541	0.992006	32.53	57.98	22	36.7
Q9VPU7	Arouser, isoform C	13	46	10	778	signal transduction;other biological processes	plasma membrane;other membranes;other cell component	cytoskeletal activity		aru	0.54	1.058	0.571	0.877	0.651	0.0549789	0.991669	0.900717	0.931101	0.944817	19.36	30.56	8.14	23.22
P13677	Protein kinase C, eye isozyme	23	167	10	700	protein metabolism;other metabolic processes;developmental processes;signal transduction;other biological processes	plasma membrane;other membranes;other cell component	kinase activity;other molecular function	Trafficking of GluR2-containing AMPA receptors; Calmodulin induced events; Disinhibition of SNARE formation	inaC	0.689	0.804	0.554	0.743	0.745	0.150037	0.946966	0.807157	0.0749833	0.992006	21.88	19.67	17.11	8.02
M9NFY9	Uncharacterized protein	53	238	10	169					Dmel\CG43090	1.391	0.805	1.12	1.174	0.953	0.0743662	0.98327	0.996921	0.491979	0.992006	10.75	38.59	45.77	33.9
Q24276	Hsp90 co-chaperone Cdc37	25	139	10	389	cell cycle OR cell proliferation;signal transduction;other biological processes	other cell component	signal transduction activity or receptor binding;enzyme regulator activity;other molecular function	Platelet degranulation ; RHOBTB2 GTPase cycle; Downregulation of ERBB2 signaling; Drug-mediated inhibition of ERBB2 signaling	Cdc37	1.024	1.42	1.454	0.928	1.567	0.999628	0.991669	0.994562	0.931101	0.992006	14.14	8.75	19.02	10.95
Q9VP27	Golgi complex-localized glycoprotein 1, isoform A	12	66	10	1103		other membranes;ER/Golgi	other molecular function		Glg1	0.94	1.108	1.041	1.024	1.017	0.998656	0.999685	0.994562	0.996612	0.992006	11.24	6.58	8.66	12.61
M9PGL7	Translocase of outer membrane 40, isoform C	37	124	10	344	cell organization and biogenesis;transport	other membranes;mitochondrion	transporter activity		Tom40	1.19	0.9	1.071	0.896	1.195	0.888708	0.991669	0.996106	0.807902	0.999391	12.32	18.16	19.69	13.23
Q9VK44	LD24832p	12	83	10	1217	protein metabolism;other metabolic processes;stress response	nucleus;other cell component	other molecular function		Ube4B	1.007	1.477	1.488	0.885	1.68	0.998656	0.991669	0.994562	0.939976	0.992006	22.25	23.83	31.14	24.79
Q9VSL4	Glutathione S transferase O2, isoform B	37	123	10	250	other metabolic processes;other biological processes	mitochondrion;other cell component	other molecular function		GstO2	0.824	0.943	0.777	0.816	0.952	0.375087	0.991669	0.994562	0.132486	0.992006	16.79	16.47	24.28	19.45
Q9VIF2	GM01519p	21	176	10	494	DNA metabolism;other biological processes	other membranes;ER/Golgi;other cytoplasmic organelle	other molecular function	Role of phospholipids in phagocytosis; Synthesis of IP3 and IP4 in the cytosol	Pld3	0.886	1.034	0.916	0.943	0.971	0.846743	0.991669	0.994562	0.939976	0.992006	26.3	16.97	22.24	13.98
Q9VYL5	GH19726p	17	86	10	761	transport	other membranes	transporter activity;other molecular function	Antigen Presentation: Folding, assembly and peptide loading of class I MHC; Mitochondrial ABC transporters	Dmel\CG1824	0.662	1.034	0.684	1.184	0.578	0.146007	0.991669	0.993091	0.833515	0.896193	8.75	24.81	20.32	14.23
A0AQH0	Proteasome subunit beta	63	453	10	224	protein metabolism;other metabolic processes	nucleus;other cell component	other molecular function	Antigen processing: Ubiquitination & Proteasome degradation; Neddylation; Regulation of RAS by GAPs; ABC-family proteins mediated transport; Degradation of beta-catenin by the destruction complex; Ub-specific processing proteases; Activation of NF-kappaB in B cells; Oxygen-dependent proline hydroxylation of Hypoxia-inducible Factor Alpha; Cross-presentation of soluble exogenous antigens (endosome…	Prosbeta1	1.077	1.572	1.693	1.017	1.666	0.998656	0.988593	0.994562	0.999871	0.992006	18.89	11.05	23.47	14.58
Q6AWN0	1,2-dihydroxy-3-keto-5-methylthiopentene dioxygenase	56	218	10	186	other metabolic processes;other biological processes	plasma membrane;other membranes;nucleus;other cell component	other molecular function	Methionine salvage pathway	Adi1	0.948	1.006	0.954	1.02	0.936	0.998656	0.991669	0.994562	0.994447	0.992006	6.19	2.91	5.69	5.81
Q8IPH0	Transglutaminase, isoform B	16	117	10	768	protein metabolism;other metabolic processes;stress response		other molecular function		Tg	0.958	0.773	0.741	0.906	0.818	0.998656	0.945683	0.994562	0.867165	0.992006	9.34	14.46	12.71	15.84
Q8I937	Ribosome biogenesis regulatory protein	42	114	10	349	RNA metabolism OR transcription;other metabolic processes;transport;other biological processes	nucleus;other cell component			BcDNA:LD24586	0.725	2.064	1.497	0.96	1.56	0.159001	0.702933	0.994562	0.989642	0.992006	38.54	21.95	12.67	9.8
Q9Y166	BcDNA.GH02431	49	283	10	280	transport	other membranes;mitochondrion	transporter activity	Gluconeogenesis; Organic anion transporters; Sulfide oxidation to sulfate	Dic1	1.159	0.932	1.079	1.133	0.953	0.766037	0.991669	0.996106	0.743104	0.992006	10.23	13.38	8.11	12.48
Q9VE80	Uncharacterized protein, isoform B	34	160	10	336	other metabolic processes	other membranes	other molecular function		Dmel\CG7675	0.84	1.903	1.599	1.01	1.584	0.622293	0.813768	0.994562	0.995836	0.992006	35.97	21.3	8.44	8.42
Q8IP80	Phosphoethanolamine cytidylyltransferase, isoform D	30	89	10	381	other metabolic processes	other cell component	other molecular function		Pect	1.076	1.358	1.461	1.418	1.03	0.998656	0.991669	0.994562	0.159986	0.992006	52.18	15.93	19.74	17.91
Q9VS44	Uncharacterized protein	43	54	10	275					Dmel\CG8607	1.265	1.423	1.8	1.131	1.592	0.828166	0.991669	0.994562	0.961246	0.992006	33.61	27.59	34.37	28.01
O44386	Integrin alpha-PS3	12	92	10	1115	cell adhesion;cell organization and biogenesis;transport;developmental processes;signal transduction;other biological processes	plasma membrane;other membranes;other cell component	other molecular function	Neutrophil degranulation; Smooth Muscle Contraction; Signal transduction by L1; Cell surface interactions at the vascular wall; Integrin cell surface interactions; Immunoregulatory interactions between a Lymphoid and a non-Lymphoid cell; Syndecan interactions	scb	1.122	0.91	1.021	1.067	0.957	0.998656	0.991669	0.994562	0.992295	0.992006	7.04	14.4	21.63	13.85
O18335	Drab11	52	209	10	214	cell cycle OR cell proliferation;cell organization and biogenesis;transport;developmental processes;signal transduction;other biological processes	plasma membrane;other membranes;ER/Golgi;nucleus;other cytoplasmic organelle;other cell component	other molecular function	Vasopressin regulates renal water homeostasis via Aquaporins; VxPx cargo-targeting to cilium; RAB geranylgeranylation	Rab11	1.047	1.381	1.447	1.036	1.396	0.998656	0.991669	0.994562	0.994447	0.992006	12.25	13.2	14.33	7.34
Q9VKQ3	Ribosome biogenesis protein WDR12 homolog	36	120	10	420	RNA metabolism OR transcription;other metabolic processes	nucleus;other cell component	other molecular function	Antigen processing: Ubiquitination & Proteasome degradation; Neddylation; Major pathway of rRNA processing in the nucleolus and cytosol		0.923	1.436	1.325	0.998	1.328	0.969028	0.991669	0.994562	0.994447	0.992006	20.09	15.5	13.65	7.07
P50887	60S ribosomal protein L22	38	630	10	299	protein metabolism;other metabolic processes	cytosol;translational apparatus	nucleic acid binding activity;other molecular function	Nonsense Mediated Decay (NMD) enhanced by the Exon Junction Complex (EJC); L13a-mediated translational silencing of Ceruloplasmin expression; Formation of a pool of free 40S subunits; Nonsense Mediated Decay (NMD) independent of the Exon Junction Complex (EJC); SRP-dependent cotranslational protein targeting to membrane; GTP hydrolysis and joining of the 60S ribosomal subunit	RpL22	0.942	1.98	1.866	1.037	1.799	0.978165	0.869247	0.994562	0.994447	0.992006	13.05	9.63	10.9	13.7
M9NDR2	Bicaudal D, isoform B	17	68	10	750			other molecular function		BicD	1.635	1.379	2.254	1.151	1.959	0.121269	0.991669	0.964289	0.920221	0.992006	44.55	25.23	37.84	26.47
A1Z6V5	FI01422p	31	134	10	393	other biological processes	non-structural extracellular		Neutrophil degranulation; COPII-mediated vesicle transport; Cargo concentration in the ER; Platelet degranulation ; Regulation of Insulin-like Growth Factor (IGF) transport and uptake by Insulin-like Growth Factor Binding Proteins (IGFBPs); Post-translational protein phosphorylation; Intrinsic Pathway of Fibrin Clot Formation; Glucocorticoid biosynthesis; Prednisone ADME	Spn43Ab	0.961	0.915	0.879	1.329	0.661	0.998656	0.991669	0.994562	0.169951	0.992006	17.92	18.13	10.96	3.93
M9PEA0	Sallimus, isoform P	31	6424	10	18468	other biological processes				sls	0.882	0.835	0.737	0.979	0.752	0.896521	0.982739	0.994562	0.994447	0.992006	12.39	11.05	9.82	21.57
Q9VK59	LD23647p	14	101	10	950					Dmel\CG5787	1.023	1.471	1.504	0.882	1.706	0.999628	0.991669	0.994562	0.888996	0.992006	10.44	9.78	17.32	21.13
Q7KQM6	GIGYF family protein CG11148	11	118	10	1574	other biological processes	cytosol;translational apparatus	nucleic acid binding activity		Gyf	1.373	0.961	1.32	0.891	1.481	0.386425	0.991669	0.994562	0.813142	0.992006	24.85	17.86	22.88	30.23
Q8IPZ3	FI02982p	39	128	10	413	developmental processes	mitochondrion	other molecular function		Dmel\CG17221	0.941	1.006	0.947	1.022	0.926	0.998656	0.991669	0.994562	0.99878	0.992006	6.38	16.29	15.65	10.73
Q7KM15	Transcription factor BTF3	57	458	10	169	developmental processes;other biological processes	cytosol;translational apparatus			bic	1.141	1.505	1.717	1.04	1.65	0.814166	0.991669	0.994562	0.994447	0.992006	5.43	22.69	25.01	24.15
M9PI82	Mo25, isoform B	32	143	10	339					Mo25	1.141	1.12	1.278	1	1.277	0.983502	0.999685	0.996106	0.994447	0.992006	28.07	14.89	7.5	14.57
E0R983	Ced-6, isoform D	27	82	10	533	other biological processes				ced-6	1.219	1.992	2.429	1.315	1.847	0.898077	0.830839	0.934005	0.491979	0.992006	13.42	23.5	28.29	23.17
Q9VDY8	MIP08680p	43	187	10	272	cell cycle OR cell proliferation;cell organization and biogenesis;transport;other biological processes	plasma membrane;other membranes;ER/Golgi;other cell component	transporter activity		vib	0.99	1.25	1.237	1.088	1.137	0.998656	0.99616	0.999991	0.940197	0.996032	6.99	12.73	9.38	13.14
Q9W369	Mutant tan	36	138	10	387	other metabolic processes;developmental processes;other biological processes	cytosol;other cell component	other molecular function		t	1.319	0.606	0.799	1.194	0.67	0.657316	0.755482	0.994562	0.713044	0.992006	22.46	20.75	25.98	37.06
Q9VXM4	LD12946p	64	223	10	248		plasma membrane;other membranes	other molecular function	Neutrophil degranulation; RHOD GTPase cycle	MSBP	0.948	1.176	1.114	0.968	1.15	0.984445	0.999685	0.996106	0.988285	0.9991	6.19	10.75	12.77	9.45
Q9XZJ4	Proteasome subunit alpha type-6	41	200	10	244	protein metabolism;other metabolic processes	cytosol;nucleus;other cell component		Ub-specific processing proteases; Activation of NF-kappaB in B cells; Downstream TCR signaling; FCERI mediated NF-kB activation; Interleukin-1 signaling; Antigen processing: Ubiquitination & Proteasome degradation; Neddylation; Regulation of RAS by GAPs; ABC-family proteins mediated transport; Degradation of beta-catenin by the destruction complex; Oxygen-dependent proline hydroxylation of Hypoxi…	Prosalpha1	1.605	1.107	1.776	1.116	1.591	0.00142925	0.999685	0.994562	0.861619	0.992006	39.67	27.96	24.12	26.91
Q9VGT8	UDP-glucuronosyltransferase	22	135	10	517		other membranes	other molecular function	Glycosphingolipid metabolism; Paracetamol ADME; Prednisone ADME	Ugt35C1	0.75	1.048	0.786	1.023	0.768	0.228187	0.991669	0.994562	0.994447	0.992006	26.98	34.37	32.8	25.32
M9NGK3	Terribly reduced optic lobes, isoform AL	39	1903	10	3728	cell organization and biogenesis;developmental processes;other biological processes	extracellular matrix			trol	1.021	0.616	0.629	0.961	0.655	0.999628	0.64864	0.955797	0.969803	0.992006	27.36	12.17	21.74	16.01
O61491	Flotillin-1	33	109	10	426	signal transduction;other biological processes	plasma membrane;other membranes;other cell component	other molecular function	RHOA GTPase cycle; Synaptic adhesion-like molecules	Flo1	0.974	0.562	0.548	0.826	0.663	0.998656	0.538054	0.850413	0.386959	0.992006	41.73	36.1	17.4	39.6
Q9V9K7	Serrate RNA effector molecule homolog	13	90	10	943	RNA metabolism OR transcription;other metabolic processes;stress response;other biological processes	nucleus		mRNA Splicing - Major Pathway; RNA polymerase II transcribes snRNA genes	Ars2	1.052	1.595	1.678	1.153	1.455	0.998656	0.962982	0.994562	0.861619	0.992006	11.74	9.27	26.2	12.88
Q9VGF9	Aurora kinase	31	66	10	411	cell cycle OR cell proliferation;cell organization and biogenesis;protein metabolism;other metabolic processes;developmental processes;other biological processes	cytoskeleton;other cell component	kinase activity;other molecular function	SUMOylation of DNA replication proteins; Regulation of TP53 Activity through Phosphorylation; APC/C:Cdh1 mediated degradation of Cdc20 and other APC/C:Cdh1 targeted proteins in late mitosis/early G1; FBXL7 down-regulates AURKA during mitotic entry and in early mitosis; TP53 Regulates Transcription of Genes Involved in G2 Cell Cycle Arrest	aurA	0.798	1.836	1.466	0.626	2.343	0.578484	0.928382	0.994562	0.0670885	0.968262	43.36	30.12	21.06	36.74
Q9VZD8	THUMP domain-containing protein 1 homolog	37	47	10	324	RNA metabolism OR transcription;other metabolic processes		nucleic acid binding activity			1.054	1.412	1.489	0.831	1.79	0.998656	0.991669	0.994562	0.759235	0.992006	18.8	6.36	15.92	20.1
Q9VK04	Phospholipid-transporting ATPase	14	93	10	1087	cell organization and biogenesis;transport	plasma membrane;other membranes;ER/Golgi;other cytoplasmic organelle	transporter activity;other molecular function		Dmel\CG31729	0.993	1.18	1.172	0.899	1.304	0.998656	0.999685	0.996701	0.927844	0.992006	28.81	14.43	11.62	20.01
Q7K3V6	Elongation factor Tu, mitochondrial	31	83	10	456	protein metabolism;other metabolic processes	mitochondrion	nucleic acid binding activity;other molecular function		mEFTu2	0.919	0.984	0.904	1.032	0.876	0.983502	0.991669	0.994562	0.994447	0.992006	9.79	13.8	11.55	10.56
E2QD73	Phosphodiesterase	15	114	10	1070	signal transduction;other biological processes		other molecular function		dnc	1.244	0.582	0.723	0.942	0.768	0.860956	0.70696	0.994562	0.963131	0.992006	11.38	13.64	8.53	15.08
Q9VJD1	Glucosidase 2 subunit beta	24	132	10	548	protein metabolism;other metabolic processes	ER/Golgi		Regulation of Insulin-like Growth Factor (IGF) transport and uptake by Insulin-like Growth Factor Binding Proteins (IGFBPs); Post-translational protein phosphorylation	GCS2beta	1.289	1.465	1.889	1.24	1.523	0.656884	0.991669	0.994562	0.576874	0.992006	21.37	25.69	38.01	30.49
Q00748	Multidrug resistance protein homolog 65	12	63	10	1302	transport;developmental processes;other biological processes	plasma membrane;other membranes;other cell component	transporter activity;other molecular function	Antigen Presentation: Folding, assembly and peptide loading of class I MHC	Mdr65	0.933	0.9	0.84	1.035	0.812	0.998656	0.991669	0.994562	0.994447	0.992006	18.81	22.2	20.75	14.26
A0A0B4K7L0	Rad50, isoform E	10	54	10	1318	cell organization and biogenesis;DNA metabolism;other metabolic processes;stress response	nucleus	kinase activity;other molecular function		rad50	0.687	2.919	2.007	1.093	1.835	0.172613	0.356452	0.994562	0.985962	0.992006	21.23	22.06	28.97	20.36
Q7KT91	Non-lysosomal glucosylceramidase	14	72	10	948	other metabolic processes	plasma membrane;other membranes	other molecular function	Glycosphingolipid metabolism		1.282	1.034	1.325	0.874	1.516	0.839692	0.991669	0.996921	0.933682	0.992006	41.04	26.45	36.07	26.9
Q08012	Growth factor receptor-bound protein 2	47	90	10	211	cell organization and biogenesis;developmental processes;signal transduction;other biological processes	plasma membrane;other membranes;nucleus;other cell component	signal transduction activity or receptor binding;other molecular function	Cargo recognition for clathrin-mediated endocytosis; EGFR downregulation; Regulation of actin dynamics for phagocytic cup formation; RHO GTPases Activate WASPs and WAVEs; RET signaling; Tie2 Signaling; RAF/MAP kinase cascade; RHOU GTPase cycle; Generation of second messenger molecules; FCERI mediated MAPK activation; Regulation of KIT signaling; PI5P, PP2A and IER3 Regulate PI3K/AKT Signaling; Do…	drk	1.062	1.007	1.07	1.011	1.059	0.998656	0.991669	0.996106	0.999871	0.992006	10.36	7.17	6.9	4.59
Q9VSN9	Signal recognition particle receptor subunit beta	43	161	10	244	transport;developmental processes	other membranes;ER/Golgi	other molecular function		SrpRbeta	0.994	1.596	1.586	0.993	1.597	0.998656	0.927026	0.994562	0.994447	0.992006	16.52	12.1	13.84	16.5
Q9VKM3	ATP synthase subunit	51	329	10	99	other metabolic processes;transport	other membranes;mitochondrion	transporter activity	Formation of ATP by chemiosmotic coupling; Cristae formation	ATPsynG	1.027	0.827	0.85	1.003	0.847	0.998656	0.991669	0.994562	0.994447	0.992006	9.43	21.23	25.6	12.51
[truncated: 3,058 more rows]
